# Supplementary material
Source: publisher figshare collection journal article supplement (https://acs.figshare.com/ndownloader/files/5467481)
Supplement: Supplementary file 1 [file 5467481]

 
data_LAK32211

_audit_creation_method           SHELXL-97
_chemical_name_systematic        ?
_chemical_name_common            ?
_chemical_formula_moiety         ?
_chemical_formula_sum            'C17 H18 Au N S2'
_chemical_melting_point          ?

_exptl_crystal_description       Needle
_exptl_crystal_colour            Colourless

_diffrn_ambient_temperature      173(2)
_chemical_formula_weight         497.41

loop_
_atom_type_symbol
_atom_type_description
_atom_type_scat_dispersion_real
_atom_type_scat_dispersion_imag
_atom_type_scat_source
C C 0.0033 0.0016 'International Tables Vol C Tables 4.2.6.8 and 6.1.1.4'
H H 0.0000 0.0000 'International Tables Vol C Tables 4.2.6.8 and 6.1.1.4'
N N 0.0061 0.0033 'International Tables Vol C Tables 4.2.6.8 and 6.1.1.4'
S S 0.1246 0.1234 'International Tables Vol C Tables 4.2.6.8 and 6.1.1.4'
Au Au -2.0133 8.8022 'International Tables Vol C Tables 4.2.6.8 and 6.1.1.4'

_symmetry_cell_setting           monoclinic
_symmetry_space_group_name_H-M   'P 21/c'
_symmetry_int_tables_number      14


loop_
_symmetry_equiv_pos_as_xyz
'x, y, z'
'-x, y+1/2, -z+1/2'
'-x, -y, -z'
'x, -y-1/2, z-1/2'

_cell_length_a                   17.0760(17)
_cell_length_b                   15.3659(16)
_cell_length_c                   13.1260(13)
_cell_angle_alpha                90.00
_cell_angle_beta                 102.0310(10)
_cell_angle_gamma                90.00
_cell_volume                     3368.5(6)
_cell_formula_units_Z            8
_cell_measurement_temperature    173(2)
_cell_measurement_reflns_used    9971
_cell_measurement_theta_min      2.4
_cell_measurement_theta_max      27.5
_exptl_crystal_size_max          0.35
_exptl_crystal_size_mid          0.15
_exptl_crystal_size_min          0.10
_exptl_crystal_density_meas      ?
_exptl_crystal_density_diffrn    1.962
_exptl_crystal_density_method    'not measured'
_exptl_crystal_F_000             1904
_exptl_absorpt_coefficient_mu    8.975
_exptl_absorpt_correction_type   multi-scan
_exptl_absorpt_correction_T_min  0.25
_exptl_absorpt_correction_T_max  0.47
_exptl_absorpt_process_details   
;
 Data were corrected for decay and absorption using the program SADABS 
 (Sheldrick, G. M. (2003). SADABS. Version 2.10. University of
 G\"ottingen, Germany).
;

_exptl_special_details           
; 
 ? 
;
_diffrn_radiation_probe          ?
_diffrn_radiation_type           MoK\a
_diffrn_radiation_wavelength     0.71073
_diffrn_source                   'fine-focus sealed tube'
_diffrn_radiation_monochromator  graphite

_diffrn_measurement_device_type  'Bruker APEXII CCD area detector'
_diffrn_measurement_method       'omega scans'
_diffrn_detector_area_resol_mean ?
_diffrn_standards_number         ?
_diffrn_standards_interval_count ?
_diffrn_standards_interval_time  ?
_diffrn_standards_decay_%        0.0
_diffrn_reflns_number            38915
_diffrn_reflns_av_R_equivalents  0.0331
_diffrn_reflns_av_sigmaI/netI    0.0254
_diffrn_reflns_limit_h_min       -22
_diffrn_reflns_limit_h_max       22
_diffrn_reflns_limit_k_min       -19
_diffrn_reflns_limit_k_max       19
_diffrn_reflns_limit_l_min       -17
_diffrn_reflns_limit_l_max       17
_diffrn_reflns_theta_min         1.22
_diffrn_reflns_theta_max         27.49
_reflns_number_total             7643
_reflns_number_gt                6716
_reflns_threshold_expression     >2sigma(I)

_computing_data_collection       'APEX2 (Bruker AXS, 2008)'
_computing_cell_refinement       'APEX2 (Bruker AXS, 2008)'
_computing_data_reduction        'APEX2 (Bruker AXS, 2008)'
_computing_structure_solution    'SHELXS-97 (Sheldrick, 1997)'
_computing_structure_refinement  'SHELXL-97 (Sheldrick, 1997)'
_computing_molecular_graphics    'X-SEED, Barbour, 2001'
_computing_publication_material  'CIFTAB (Sheldrick, 1997)'

_refine_special_details          
; 
 Refinement of F^2^ against ALL reflections.  The weighted R-factor wR and 
 goodness of fit S are based on F^2^, conventional R-factors R are based 
 on F, with F set to zero for negative F^2^. The threshold expression of 
 F^2^ > 2sigma(F^2^) is used only for calculating R-factors(gt) etc. and is 
 not relevant to the choice of reflections for refinement.  R-factors based 
 on F^2^ are statistically about twice as large as those based on F, and R- 
 factors based on ALL data will be even larger. 
;

_refine_ls_structure_factor_coef Fsqd
_refine_ls_matrix_type           full
_refine_ls_weighting_scheme      calc
_refine_ls_weighting_details     
'calc w=1/[\s^2^(Fo^2^)+(0.0154P)^2^+1.1182P] where P=(Fo^2^+2Fc^2^)/3'
_atom_sites_solution_primary     direct
_atom_sites_solution_secondary   difmap
_atom_sites_solution_hydrogens   geom
_refine_ls_hydrogen_treatment    constr
_refine_ls_extinction_method     none
_refine_ls_extinction_coef       ?
_refine_ls_number_reflns         7643
_refine_ls_number_parameters     383
_refine_ls_number_restraints     0
_refine_ls_R_factor_all          0.0246
_refine_ls_R_factor_gt           0.0185
_refine_ls_wR_factor_ref         0.0396
_refine_ls_wR_factor_gt          0.0378
_refine_ls_goodness_of_fit_ref   1.021
_refine_ls_restrained_S_all      1.021
_refine_ls_shift/su_max          0.002
_refine_ls_shift/su_mean         0.000

loop_
_atom_site_label
_atom_site_type_symbol
_atom_site_fract_x
_atom_site_fract_y
_atom_site_fract_z
_atom_site_U_iso_or_equiv
_atom_site_adp_type
_atom_site_occupancy
_atom_site_symmetry_multiplicity
_atom_site_calc_flag
_atom_site_refinement_flags
_atom_site_disorder_assembly
_atom_site_disorder_group
Au1 Au 0.490798(6) 0.381742(7) 0.440792(8) 0.02331(3) Uani 1 1 d . . .
Au2 Au 0.016937(6) 0.578102(7) 0.599591(8) 0.02283(3) Uani 1 1 d . . .
S1 S 0.56159(4) 0.47822(5) 0.34902(6) 0.02715(16) Uani 1 1 d . . .
S2 S 0.39166(4) 0.47632(5) 0.34428(6) 0.02898(16) Uani 1 1 d . . .
S3 S 0.08992(4) 0.68442(5) 0.52417(6) 0.02830(16) Uani 1 1 d . . .
S4 S -0.08112(4) 0.67808(5) 0.51114(6) 0.02980(16) Uani 1 1 d . . .
N1 N 0.45911(15) 0.58915(15) 0.23112(19) 0.0286(5) Uani 1 1 d . . .
N2 N -0.01212(15) 0.79014(16) 0.39925(18) 0.0310(6) Uani 1 1 d . . .
C1 C 0.57963(17) 0.30477(18) 0.5195(2) 0.0253(6) Uani 1 1 d . . .
C2 C 0.66008(17) 0.31145(19) 0.5147(2) 0.0311(7) Uani 1 1 d . . .
H2 H 0.6768 0.3533 0.4705 0.037 Uiso 1 1 calc R . .
C3 C 0.71604(18) 0.2562(2) 0.5754(2) 0.0349(7) Uani 1 1 d . . .
H3 H 0.7710 0.2605 0.5722 0.042 Uiso 1 1 calc R . .
C4 C 0.69214(19) 0.1953(2) 0.6401(3) 0.0379(8) Uani 1 1 d . . .
H4 H 0.7306 0.1582 0.6813 0.045 Uiso 1 1 calc R . .
C5 C 0.61205(18) 0.18831(19) 0.6451(2) 0.0330(7) Uani 1 1 d . . .
H5 H 0.5958 0.1462 0.6895 0.040 Uiso 1 1 calc R . .
C6 C 0.55539(17) 0.24268(18) 0.5853(2) 0.0254(6) Uani 1 1 d . . .
C7 C 0.46817(17) 0.24325(18) 0.5833(2) 0.0264(6) Uani 1 1 d . . .
C8 C 0.42430(17) 0.30485(18) 0.5158(2) 0.0265(6) Uani 1 1 d . . .
C9 C 0.34218(18) 0.3114(2) 0.5077(3) 0.0364(7) Uani 1 1 d . . .
H9 H 0.3122 0.3532 0.4624 0.044 Uiso 1 1 calc R . .
C10 C 0.3041(2) 0.2567(2) 0.5662(3) 0.0447(9) Uani 1 1 d . . .
H10 H 0.2478 0.2609 0.5602 0.054 Uiso 1 1 calc R . .
C11 C 0.34720(19) 0.1963(2) 0.6327(3) 0.0401(8) Uani 1 1 d . . .
H11 H 0.3207 0.1598 0.6732 0.048 Uiso 1 1 calc R . .
C12 C 0.42871(18) 0.18876(19) 0.6406(2) 0.0322(7) Uani 1 1 d . . .
H12 H 0.4580 0.1461 0.6855 0.039 Uiso 1 1 calc R . .
C13 C 0.46925(17) 0.52429(17) 0.2977(2) 0.0242(6) Uani 1 1 d . . .
C14 C 0.52767(19) 0.62746(18) 0.1947(2) 0.0323(7) Uani 1 1 d . . .
H14A H 0.5751 0.6274 0.2527 0.039 Uiso 1 1 calc R . .
H14B H 0.5152 0.6887 0.1742 0.039 Uiso 1 1 calc R . .
C15 C 0.5476(2) 0.5787(2) 0.1032(2) 0.0391(8) Uani 1 1 d . . .
H15A H 0.5604 0.5181 0.1232 0.059 Uiso 1 1 calc R . .
H15B H 0.5938 0.6060 0.0827 0.059 Uiso 1 1 calc R . .
H15C H 0.5015 0.5804 0.0446 0.059 Uiso 1 1 calc R . .
C16 C 0.37749(19) 0.6234(2) 0.1886(3) 0.0401(8) Uani 1 1 d . . .
H16A H 0.3818 0.6838 0.1642 0.048 Uiso 1 1 calc R . .
H16B H 0.3470 0.6249 0.2450 0.048 Uiso 1 1 calc R . .
C17 C 0.3319(2) 0.5689(3) 0.0990(3) 0.0554(10) Uani 1 1 d . . .
H17A H 0.3596 0.5710 0.0407 0.083 Uiso 1 1 calc R . .
H17B H 0.2776 0.5920 0.0764 0.083 Uiso 1 1 calc R . .
H17C H 0.3291 0.5085 0.1219 0.083 Uiso 1 1 calc R . .
C18 C 0.10587(16) 0.49998(18) 0.6770(2) 0.0249(6) Uani 1 1 d . . .
C19 C 0.18587(18) 0.5082(2) 0.6759(2) 0.0347(7) Uani 1 1 d . . .
H19 H 0.2034 0.5526 0.6356 0.042 Uiso 1 1 calc R . .
C20 C 0.2413(2) 0.4512(2) 0.7342(3) 0.0456(9) Uani 1 1 d . . .
H20 H 0.2965 0.4568 0.7330 0.055 Uiso 1 1 calc R . .
C21 C 0.2164(2) 0.3864(2) 0.7937(3) 0.0446(9) Uani 1 1 d . . .
H21 H 0.2544 0.3481 0.8337 0.054 Uiso 1 1 calc R . .
C22 C 0.13567(19) 0.37773(19) 0.7948(2) 0.0331(7) Uani 1 1 d . . .
H22 H 0.1186 0.3332 0.8355 0.040 Uiso 1 1 calc R . .
C23 C 0.07961(18) 0.43390(18) 0.7366(2) 0.0261(6) Uani 1 1 d . . .
C24 C -0.00766(17) 0.43093(18) 0.7293(2) 0.0254(6) Uani 1 1 d . . .
C25 C -0.05113(17) 0.49421(18) 0.6638(2) 0.0257(6) Uani 1 1 d . . .
C26 C -0.13382(17) 0.49612(19) 0.6475(2) 0.0302(7) Uani 1 1 d . . .
H26 H -0.1632 0.5389 0.6030 0.036 Uiso 1 1 calc R . .
C27 C -0.17369(19) 0.4352(2) 0.6963(3) 0.0354(7) Uani 1 1 d . . .
H27 H -0.2305 0.4364 0.6849 0.042 Uiso 1 1 calc R . .
C28 C -0.13156(19) 0.3733(2) 0.7611(2) 0.0346(7) Uani 1 1 d . . .
H28 H -0.1595 0.3322 0.7943 0.041 Uiso 1 1 calc R . .
C29 C -0.04896(18) 0.37046(18) 0.7784(2) 0.0299(7) Uani 1 1 d . . .
H29 H -0.0202 0.3276 0.8235 0.036 Uiso 1 1 calc R . .
C30 C -0.00266(17) 0.72770(18) 0.4687(2) 0.0261(6) Uani 1 1 d . . .
C31 C 0.05725(19) 0.8297(2) 0.3658(2) 0.0355(7) Uani 1 1 d . . .
H31A H 0.0395 0.8522 0.2940 0.043 Uiso 1 1 calc R . .
H31B H 0.0978 0.7840 0.3641 0.043 Uiso 1 1 calc R . .
C32 C 0.0960(2) 0.9029(2) 0.4351(3) 0.0464(9) Uani 1 1 d . . .
H32A H 0.0567 0.9492 0.4362 0.070 Uiso 1 1 calc R . .
H32B H 0.1411 0.9262 0.4081 0.070 Uiso 1 1 calc R . .
H32C H 0.1154 0.8809 0.5059 0.070 Uiso 1 1 calc R . .
C33 C -0.0936(2) 0.8223(2) 0.3496(3) 0.0413(8) Uani 1 1 d . . .
H33A H -0.0944 0.8375 0.2761 0.050 Uiso 1 1 calc R . .
H33B H -0.1329 0.7750 0.3500 0.050 Uiso 1 1 calc R . .
C34 C -0.1179(2) 0.8997(2) 0.4036(3) 0.0562(10) Uani 1 1 d . . .
H34A H -0.1162 0.8853 0.4767 0.084 Uiso 1 1 calc R . .
H34B H -0.1725 0.9168 0.3699 0.084 Uiso 1 1 calc R . .
H34C H -0.0811 0.9479 0.3996 0.084 Uiso 1 1 calc R . .

loop_
_atom_site_aniso_label
_atom_site_aniso_U_11
_atom_site_aniso_U_22
_atom_site_aniso_U_33
_atom_site_aniso_U_23
_atom_site_aniso_U_13
_atom_site_aniso_U_12
Au1 0.03011(6) 0.01880(6) 0.02083(6) 0.00078(4) 0.00484(4) 0.00023(4)
Au2 0.03073(6) 0.01822(6) 0.01990(6) -0.00063(4) 0.00608(4) -0.00076(4)
S1 0.0319(4) 0.0241(4) 0.0251(4) 0.0034(3) 0.0052(3) -0.0001(3)
S2 0.0332(4) 0.0256(4) 0.0287(4) 0.0042(3) 0.0077(3) 0.0036(3)
S3 0.0330(4) 0.0244(4) 0.0283(4) 0.0041(3) 0.0081(3) 0.0007(3)
S4 0.0320(4) 0.0257(4) 0.0319(4) 0.0050(3) 0.0072(3) 0.0012(3)
N1 0.0371(14) 0.0233(13) 0.0254(14) 0.0045(10) 0.0064(11) 0.0033(11)
N2 0.0366(14) 0.0293(14) 0.0267(14) 0.0073(11) 0.0056(11) 0.0018(11)
C1 0.0294(15) 0.0197(14) 0.0249(15) -0.0040(12) 0.0014(12) 0.0003(12)
C2 0.0341(16) 0.0279(16) 0.0310(17) -0.0002(13) 0.0059(13) -0.0031(13)
C3 0.0288(16) 0.0317(17) 0.0428(19) 0.0017(14) 0.0037(14) 0.0014(13)
C4 0.0365(18) 0.0315(17) 0.042(2) 0.0072(15) -0.0011(15) 0.0058(14)
C5 0.0390(18) 0.0251(16) 0.0340(18) 0.0084(13) 0.0054(14) 0.0023(13)
C6 0.0300(15) 0.0216(15) 0.0239(15) -0.0033(12) 0.0038(12) -0.0018(12)
C7 0.0326(16) 0.0205(14) 0.0259(15) -0.0036(12) 0.0053(12) -0.0016(12)
C8 0.0318(16) 0.0220(15) 0.0256(15) -0.0009(12) 0.0056(12) -0.0033(12)
C9 0.0353(17) 0.0327(18) 0.0398(19) 0.0083(15) 0.0049(14) 0.0037(14)
C10 0.0331(18) 0.047(2) 0.056(2) 0.0134(18) 0.0149(16) 0.0010(15)
C11 0.0412(19) 0.0371(19) 0.044(2) 0.0098(16) 0.0144(16) -0.0039(15)
C12 0.0362(17) 0.0247(16) 0.0353(18) 0.0054(13) 0.0064(14) -0.0007(13)
C13 0.0326(15) 0.0204(14) 0.0189(14) -0.0039(11) 0.0039(12) -0.0009(12)
C14 0.0440(18) 0.0205(15) 0.0334(18) 0.0068(13) 0.0105(14) -0.0004(13)
C15 0.0457(19) 0.043(2) 0.0297(18) 0.0066(15) 0.0109(15) 0.0016(16)
C16 0.0412(19) 0.0324(19) 0.046(2) 0.0179(15) 0.0089(16) 0.0099(15)
C17 0.050(2) 0.069(3) 0.041(2) 0.0124(19) -0.0057(18) 0.003(2)
C18 0.0309(15) 0.0218(14) 0.0214(15) -0.0032(11) 0.0040(12) 0.0014(12)
C19 0.0361(17) 0.0318(17) 0.0372(19) 0.0075(14) 0.0095(14) -0.0012(14)
C20 0.0317(18) 0.046(2) 0.059(2) 0.0135(18) 0.0085(16) 0.0041(16)
C21 0.0383(19) 0.039(2) 0.054(2) 0.0134(17) 0.0036(17) 0.0085(15)
C22 0.0408(18) 0.0239(16) 0.0343(18) 0.0066(13) 0.0069(14) 0.0016(13)
C23 0.0344(16) 0.0231(15) 0.0211(15) -0.0034(12) 0.0064(12) -0.0029(12)
C24 0.0335(16) 0.0217(15) 0.0211(15) -0.0044(11) 0.0055(12) -0.0016(12)
C25 0.0341(16) 0.0203(14) 0.0233(15) -0.0013(12) 0.0073(12) -0.0065(12)
C26 0.0337(16) 0.0236(15) 0.0336(17) -0.0012(13) 0.0075(13) -0.0006(13)
C27 0.0334(17) 0.0342(18) 0.0403(19) -0.0059(14) 0.0116(14) -0.0057(14)
C28 0.0414(18) 0.0308(18) 0.0340(18) -0.0015(14) 0.0137(15) -0.0095(14)
C29 0.0430(18) 0.0215(15) 0.0257(16) 0.0013(12) 0.0081(13) -0.0021(13)
C30 0.0334(16) 0.0231(15) 0.0224(15) -0.0006(12) 0.0072(12) 0.0010(12)
C31 0.0432(18) 0.0347(18) 0.0298(17) 0.0112(14) 0.0104(14) -0.0005(14)
C32 0.054(2) 0.037(2) 0.048(2) 0.0056(17) 0.0096(18) -0.0097(17)
C33 0.048(2) 0.0352(19) 0.041(2) 0.0128(15) 0.0084(16) 0.0036(16)
C34 0.065(3) 0.050(2) 0.053(3) 0.0081(19) 0.012(2) 0.012(2)

_geom_special_details            
; 
 All esds (except the esd in the dihedral angle between two l.s. planes) 
 are estimated using the full covariance matrix.  The cell esds are taken 
 into account individually in the estimation of esds in distances, angles 
 and torsion angles; correlations between esds in cell parameters are only 
 used when they are defined by crystal symmetry.  An approximate (isotropic) 
 treatment of cell esds is used for estimating esds involving l.s. planes. 
;

loop_
_geom_bond_atom_site_label_1
_geom_bond_atom_site_label_2
_geom_bond_distance
_geom_bond_site_symmetry_2
_geom_bond_publ_flag
Au1 C1 2.028(3) . ?
Au1 C8 2.030(3) . ?
Au1 S2 2.3851(7) . ?
Au1 S1 2.3911(7) . ?
Au2 C25 2.033(3) . ?
Au2 C18 2.034(3) . ?
Au2 S4 2.3877(8) . ?
Au2 S3 2.3909(7) . ?
S1 C13 1.732(3) . ?
S2 C13 1.735(3) . ?
S3 C30 1.730(3) . ?
S4 C30 1.731(3) . ?
N1 C13 1.313(3) . ?
N1 C14 1.476(4) . ?
N1 C16 1.485(4) . ?
N2 C30 1.310(4) . ?
N2 C31 1.477(4) . ?
N2 C33 1.492(4) . ?
C1 C2 1.392(4) . ?
C1 C6 1.406(4) . ?
C2 C3 1.397(4) . ?
C3 C4 1.380(4) . ?
C4 C5 1.387(4) . ?
C5 C6 1.390(4) . ?
C6 C7 1.484(4) . ?
C7 C12 1.391(4) . ?
C7 C8 1.402(4) . ?
C8 C9 1.388(4) . ?
C9 C10 1.388(4) . ?
C10 C11 1.377(4) . ?
C11 C12 1.379(4) . ?
C14 C15 1.513(4) . ?
C16 C17 1.521(5) . ?
C18 C19 1.375(4) . ?
C18 C23 1.411(4) . ?
C19 C20 1.395(4) . ?
C20 C21 1.386(5) . ?
C21 C22 1.387(4) . ?
C22 C23 1.393(4) . ?
C23 C24 1.474(4) . ?
C24 C29 1.402(4) . ?
C24 C25 1.403(4) . ?
C25 C26 1.384(4) . ?
C26 C27 1.390(4) . ?
C27 C28 1.375(4) . ?
C28 C29 1.382(4) . ?
C31 C32 1.509(4) . ?
C33 C34 1.487(5) . ?

loop_
_geom_angle_atom_site_label_1
_geom_angle_atom_site_label_2
_geom_angle_atom_site_label_3
_geom_angle
_geom_angle_site_symmetry_1
_geom_angle_site_symmetry_3
_geom_angle_publ_flag
C1 Au1 C8 81.26(11) . . ?
C1 Au1 S2 176.88(8) . . ?
C8 Au1 S2 101.86(8) . . ?
C1 Au1 S1 102.42(8) . . ?
C8 Au1 S1 176.26(8) . . ?
S2 Au1 S1 74.46(3) . . ?
C25 Au2 C18 81.39(11) . . ?
C25 Au2 S4 101.89(8) . . ?
C18 Au2 S4 176.02(8) . . ?
C25 Au2 S3 175.96(8) . . ?
C18 Au2 S3 102.17(8) . . ?
S4 Au2 S3 74.47(3) . . ?
C13 S1 Au1 86.25(10) . . ?
C13 S2 Au1 86.36(10) . . ?
C30 S3 Au2 85.83(10) . . ?
C30 S4 Au2 85.90(10) . . ?
C13 N1 C14 121.0(2) . . ?
C13 N1 C16 120.1(3) . . ?
C14 N1 C16 118.8(2) . . ?
C30 N2 C31 121.2(2) . . ?
C30 N2 C33 121.0(3) . . ?
C31 N2 C33 117.8(2) . . ?
C2 C1 C6 119.8(3) . . ?
C2 C1 Au1 125.1(2) . . ?
C6 C1 Au1 115.1(2) . . ?
C1 C2 C3 119.6(3) . . ?
C4 C3 C2 120.5(3) . . ?
C3 C4 C5 120.2(3) . . ?
C4 C5 C6 120.2(3) . . ?
C5 C6 C1 119.7(3) . . ?
C5 C6 C7 126.3(3) . . ?
C1 C6 C7 114.1(2) . . ?
C12 C7 C8 119.5(3) . . ?
C12 C7 C6 125.8(3) . . ?
C8 C7 C6 114.7(2) . . ?
C9 C8 C7 119.7(3) . . ?
C9 C8 Au1 125.4(2) . . ?
C7 C8 Au1 114.8(2) . . ?
C10 C9 C8 119.8(3) . . ?
C11 C10 C9 120.5(3) . . ?
C10 C11 C12 120.2(3) . . ?
C11 C12 C7 120.2(3) . . ?
N1 C13 S1 123.5(2) . . ?
N1 C13 S2 123.5(2) . . ?
S1 C13 S2 112.92(15) . . ?
N1 C14 C15 112.6(2) . . ?
N1 C16 C17 112.6(3) . . ?
C19 C18 C23 120.2(3) . . ?
C19 C18 Au2 125.5(2) . . ?
C23 C18 Au2 114.3(2) . . ?
C18 C19 C20 120.0(3) . . ?
C21 C20 C19 120.4(3) . . ?
C20 C21 C22 119.9(3) . . ?
C21 C22 C23 120.3(3) . . ?
C22 C23 C18 119.2(3) . . ?
C22 C23 C24 125.9(3) . . ?
C18 C23 C24 114.8(3) . . ?
C29 C24 C25 119.2(3) . . ?
C29 C24 C23 126.1(3) . . ?
C25 C24 C23 114.7(2) . . ?
C26 C25 C24 120.1(3) . . ?
C26 C25 Au2 125.1(2) . . ?
C24 C25 Au2 114.7(2) . . ?
C25 C26 C27 119.8(3) . . ?
C28 C27 C26 120.5(3) . . ?
C27 C28 C29 120.5(3) . . ?
C28 C29 C24 119.8(3) . . ?
N2 C30 S3 122.9(2) . . ?
N2 C30 S4 123.7(2) . . ?
S3 C30 S4 113.33(16) . . ?
N2 C31 C32 113.9(3) . . ?
C34 C33 N2 112.6(3) . . ?

_diffrn_measured_fraction_theta_max 0.990
_diffrn_reflns_theta_full        27.49
_diffrn_measured_fraction_theta_full 0.990
_refine_diff_density_max         0.698
_refine_diff_density_min         -0.516
_refine_diff_density_rms         0.093

#===END
 
data_LAK7814

_audit_creation_method           SHELXL-2013
_chemical_name_systematic        ?
_chemical_name_common            ?
_chemical_formula_moiety         'C19 H22 Au N O2 S2'
_chemical_formula_sum            'C19 H22 Au N O2 S2'
_chemical_melting_point          ?

_exptl_crystal_description       Block
_exptl_crystal_colour            pale-yellow

_diffrn_ambient_temperature      100(2)
_chemical_formula_weight         557.46

loop_
_atom_type_symbol
_atom_type_description
_atom_type_scat_dispersion_real
_atom_type_scat_dispersion_imag
_atom_type_scat_source
C C 0.0033 0.0016 'International Tables Vol C Tables 4.2.6.8 and 6.1.1.4'
H H 0.0000 0.0000 'International Tables Vol C Tables 4.2.6.8 and 6.1.1.4'
N N 0.0061 0.0033 'International Tables Vol C Tables 4.2.6.8 and 6.1.1.4'
O O 0.0106 0.0060 'International Tables Vol C Tables 4.2.6.8 and 6.1.1.4'
S S 0.1246 0.1234 'International Tables Vol C Tables 4.2.6.8 and 6.1.1.4'
Au Au -2.0133 8.8022 'International Tables Vol C Tables 4.2.6.8 and 6.1.1.4'

_space_group_crystal_system      orthorhombic
_space_group_IT_number           52
_space_group_name_H-M_alt        'P n n a'
_space_group_name_Hall           '-P 2a 2bc'

_shelx_space_group_comment       
;
The symmetry employed for this shelxl refinement is uniquely defined
by the following loop, which should always be used as a source of
symmetry information in preference to the above space-group names.
They are only intended as comments.
;

loop_
_space_group_symop_operation_xyz
'x, y, z'
'-x+1/2, -y, z'
'x, -y+1/2, -z+1/2'
'-x+1/2, y+1/2, -z+1/2'
'-x, -y, -z'
'x-1/2, y, -z'
'-x, y-1/2, z-1/2'
'x-1/2, -y-1/2, z-1/2'

_cell_length_a                   9.6573(7)
_cell_length_b                   14.9056(11)
_cell_length_c                   13.0267(10)
_cell_angle_alpha                90
_cell_angle_beta                 90
_cell_angle_gamma                90
_cell_volume                     1875.2(2)
_cell_formula_units_Z            4
_cell_measurement_temperature    100(2)
_cell_measurement_reflns_used    9441
_cell_measurement_theta_min      2.5
_cell_measurement_theta_max      27.5
_exptl_crystal_density_meas      ?
_exptl_crystal_density_method    ?
_exptl_crystal_density_diffrn    1.975
_exptl_crystal_F_000             1080
_exptl_transmission_factor_min   ?
_exptl_transmission_factor_max   ?
_exptl_crystal_size_max          0.400
_exptl_crystal_size_mid          0.250
_exptl_crystal_size_min          0.150
_exptl_absorpt_coefficient_mu    8.081
_shelx_estimated_absorpt_T_min   0.140
_shelx_estimated_absorpt_T_max   0.377
_exptl_absorpt_correction_type   multi-scan
_exptl_absorpt_correction_T_min  0.21
_exptl_absorpt_correction_T_max  0.38
_exptl_absorpt_process_details   
;
 Data were corrected for decay and absorption using the program SADABS 
 (Sheldrick, G. M. (2003). SADABS. Version 2.10. University of
 G\"ottingen, Germany).
;

_exptl_special_details           
;
 ?
;
_diffrn_radiation_probe          ?
_diffrn_radiation_type           MoK\a
_diffrn_radiation_wavelength     0.71073
_diffrn_source                   ?

_diffrn_measurement_device_type  'Bruker APEXII CCD area detector'
_diffrn_measurement_method       'omega scans'
_diffrn_detector_area_resol_mean ?
_diffrn_reflns_number            20431
_diffrn_reflns_av_unetI/netI     0.0123
_diffrn_reflns_av_R_equivalents  0.0243
_diffrn_reflns_limit_h_min       -12
_diffrn_reflns_limit_h_max       12
_diffrn_reflns_limit_k_min       -19
_diffrn_reflns_limit_k_max       19
_diffrn_reflns_limit_l_min       -16
_diffrn_reflns_limit_l_max       16
_diffrn_reflns_theta_min         2.076
_diffrn_reflns_theta_max         27.526
_diffrn_reflns_theta_full        25.242
_diffrn_measured_fraction_theta_max 1.000
_diffrn_measured_fraction_theta_full 1.000
_diffrn_reflns_Laue_measured_fraction_max 1.000
_diffrn_reflns_Laue_measured_fraction_full 1.000
_diffrn_reflns_point_group_measured_fraction_max 1.000
_diffrn_reflns_point_group_measured_fraction_full 1.000
_reflns_number_total             2168
_reflns_number_gt                1855
_reflns_threshold_expression     'I > 2\s(I)'
_reflns_Friedel_coverage         0.000
_reflns_Friedel_fraction_max     .
_reflns_Friedel_fraction_full    .

_reflns_special_details          
;
 Reflections were merged by SHELXL according to the crystal
 class for the calculation of statistics and refinement.
 
 _reflns_Friedel_fraction is defined as the number of unique
 Friedel pairs measured divided by the number that would be
 possible theoretically, ignoring centric projections and
 systematic absences.
;

_computing_data_collection       'APEX2 (Bruker AXS, 2008)'
_computing_cell_refinement       'APEX2 (Bruker AXS, 2008)'
_computing_data_reduction        'APEX2 (Bruker AXS, 2008)'
_computing_structure_solution    'SHELXS-2013 (Sheldrick, 2013)'
_computing_structure_refinement  'SHELXL-2013 (Sheldrick, 2013)'
_computing_molecular_graphics    'X-SEED, Barbour, 2001'
_computing_publication_material  'CIFTAB (Sheldrick, 2013)'

_refine_special_details          
;
 ?
;
_refine_ls_structure_factor_coef Fsqd
_refine_ls_matrix_type           full
_refine_ls_weighting_scheme      calc
_refine_ls_weighting_details     
'w=1/[\s^2^(Fo^2^)+(0.0132P)^2^+2.5191P] where P=(Fo^2^+2Fc^2^)/3'
_atom_sites_solution_primary     ?
_atom_sites_solution_secondary   ?
_atom_sites_solution_hydrogens   geom
_refine_ls_hydrogen_treatment    constr
_refine_ls_extinction_method     none
_refine_ls_extinction_coef       .
_refine_ls_number_reflns         2168
_refine_ls_number_parameters     117
_refine_ls_number_restraints     0
_refine_ls_R_factor_all          0.0177
_refine_ls_R_factor_gt           0.0139
_refine_ls_wR_factor_ref         0.0333
_refine_ls_wR_factor_gt          0.0321
_refine_ls_goodness_of_fit_ref   1.053
_refine_ls_restrained_S_all      1.053
_refine_ls_shift/su_max          0.002
_refine_ls_shift/su_mean         0.000

loop_
_atom_site_label
_atom_site_type_symbol
_atom_site_fract_x
_atom_site_fract_y
_atom_site_fract_z
_atom_site_U_iso_or_equiv
_atom_site_adp_type
_atom_site_occupancy
_atom_site_site_symmetry_order
_atom_site_calc_flag
_atom_site_refinement_flags_posn
_atom_site_refinement_flags_adp
_atom_site_refinement_flags_occupancy
_atom_site_disorder_assembly
_atom_site_disorder_group
Au1 Au 0.2500 0.5000 0.28119(2) 0.01180(4) Uani 1 2 d S T P . .
S1 S 0.14835(6) 0.57176(3) 0.42759(4) 0.01476(10) Uani 1 1 d . . . . .
O1 O -0.00826(17) 0.67993(11) -0.10076(12) 0.0196(3) Uani 1 1 d . . . . .
N1 N 0.2500 0.5000 0.6014(2) 0.0145(5) Uani 1 2 d S T P . .
C1 C 0.1591(2) 0.56549(14) 0.16278(15) 0.0136(4) Uani 1 1 d . . . . .
C2 C 0.0639(2) 0.63436(15) 0.17280(17) 0.0170(4) Uani 1 1 d . . . . .
H2 H 0.0386 0.6547 0.2393 0.020 Uiso 1 1 calc R U . . .
C3 C 0.0042(2) 0.67447(15) 0.08611(17) 0.0178(5) Uani 1 1 d . . . . .
H3 H -0.0619 0.7212 0.0937 0.021 Uiso 1 1 calc R U . . .
C4 C 0.0427(2) 0.64522(15) -0.01111(16) 0.0155(4) Uani 1 1 d . . . . .
C5 C 0.1402(2) 0.57626(14) -0.02218(16) 0.0151(4) Uani 1 1 d . . . . .
H5 H 0.1667 0.5567 -0.0888 0.018 Uiso 1 1 calc R U . . .
C6 C 0.1979(2) 0.53663(15) 0.06385(17) 0.0140(4) Uani 1 1 d . . . . .
C7 C -0.1079(2) 0.75067(15) -0.09177(17) 0.0195(5) Uani 1 1 d . . . . .
H7A H -0.1902 0.7283 -0.0560 0.029 Uiso 1 1 calc R U . . .
H7B H -0.1340 0.7716 -0.1604 0.029 Uiso 1 1 calc R U . . .
H7C H -0.0676 0.8005 -0.0528 0.029 Uiso 1 1 calc R U . . .
C8 C 0.2500 0.5000 0.5005(2) 0.0140(6) Uani 1 2 d S T P . .
C9 C 0.1512(2) 0.55458(14) 0.66066(16) 0.0163(4) Uani 1 1 d . . . . .
H9A H 0.1253 0.5217 0.7239 0.020 Uiso 1 1 calc R U . . .
H9B H 0.0660 0.5632 0.6195 0.020 Uiso 1 1 calc R U . . .
C10 C 0.2088(3) 0.64561(17) 0.6900(2) 0.0232(5) Uani 1 1 d . . . . .
H10A H 0.2969 0.6377 0.7264 0.035 Uiso 1 1 calc R U . . .
H10B H 0.1428 0.6766 0.7348 0.035 Uiso 1 1 calc R U . . .
H10C H 0.2241 0.6813 0.6279 0.035 Uiso 1 1 calc R U . . .

loop_
_atom_site_aniso_label
_atom_site_aniso_U_11
_atom_site_aniso_U_22
_atom_site_aniso_U_33
_atom_site_aniso_U_23
_atom_site_aniso_U_13
_atom_site_aniso_U_12
Au1 0.01063(6) 0.01477(6) 0.01002(6) 0.000 0.000 -0.00062(5)
S1 0.0160(2) 0.0163(2) 0.0120(2) 0.0002(2) 0.0003(2) 0.0013(2)
O1 0.0205(8) 0.0237(8) 0.0146(8) 0.0026(6) -0.0003(6) 0.0092(7)
N1 0.0153(12) 0.0144(12) 0.0137(12) 0.000 0.000 -0.0032(11)
C1 0.0108(10) 0.0172(10) 0.0128(10) 0.0018(8) -0.0007(8) -0.0017(8)
C2 0.0158(11) 0.0209(11) 0.0144(10) -0.0020(8) 0.0038(9) 0.0016(9)
C3 0.0136(10) 0.0201(11) 0.0198(12) 0.0006(9) 0.0021(9) 0.0044(9)
C4 0.0126(10) 0.0179(10) 0.0159(10) 0.0022(8) -0.0007(8) 0.0004(9)
C5 0.0144(10) 0.0188(10) 0.0119(10) -0.0005(8) 0.0010(8) 0.0016(9)
C6 0.0101(9) 0.0149(10) 0.0169(11) -0.0006(9) 0.0011(9) -0.0003(8)
C7 0.0179(11) 0.0202(11) 0.0203(11) 0.0023(9) -0.0016(9) 0.0057(9)
C8 0.0130(14) 0.0118(13) 0.0171(14) 0.000 0.000 -0.0034(12)
C9 0.0170(11) 0.0189(11) 0.0130(10) -0.0018(8) 0.0023(9) -0.0003(9)
C10 0.0226(12) 0.0229(12) 0.0242(12) -0.0074(10) 0.0012(10) -0.0022(10)

_geom_special_details            
;
 All esds (except the esd in the dihedral angle between two l.s. planes)
 are estimated using the full covariance matrix.  The cell esds are taken
 into account individually in the estimation of esds in distances, angles
 and torsion angles; correlations between esds in cell parameters are only
 used when they are defined by crystal symmetry.  An approximate (isotropic)
 treatment of cell esds is used for estimating esds involving l.s. planes.
;

loop_
_geom_bond_atom_site_label_1
_geom_bond_atom_site_label_2
_geom_bond_distance
_geom_bond_site_symmetry_2
_geom_bond_publ_flag
Au1 C1 2.025(2) 2_565 ?
Au1 C1 2.026(2) . ?
Au1 S1 2.3968(5) . ?
Au1 S1 2.3968(5) 2_565 ?
S1 C8 1.7349(18) . ?
O1 C4 1.369(3) . ?
O1 C7 1.432(3) . ?
N1 C8 1.314(4) . ?
N1 C9 1.473(2) . ?
N1 C9 1.473(2) 2_565 ?
C1 C2 1.385(3) . ?
C1 C6 1.409(3) . ?
C2 C3 1.402(3) . ?
C2 H2 0.9500 . ?
C3 C4 1.390(3) . ?
C3 H3 0.9500 . ?
C4 C5 1.401(3) . ?
C5 C6 1.384(3) . ?
C5 H5 0.9500 . ?
C6 C6 1.485(4) 2_565 ?
C7 H7A 0.9800 . ?
C7 H7B 0.9800 . ?
C7 H7C 0.9800 . ?
C8 S1 1.7350(18) 2_565 ?
C9 C10 1.516(3) . ?
C9 H9A 0.9900 . ?
C9 H9B 0.9900 . ?
C10 H10A 0.9800 . ?
C10 H10B 0.9800 . ?
C10 H10C 0.9800 . ?

loop_
_geom_angle_atom_site_label_1
_geom_angle_atom_site_label_2
_geom_angle_atom_site_label_3
_geom_angle
_geom_angle_site_symmetry_1
_geom_angle_site_symmetry_3
_geom_angle_publ_flag
C1 Au1 C1 80.80(12) 2_565 . ?
C1 Au1 S1 176.86(6) 2_565 . ?
C1 Au1 S1 102.32(6) . . ?
C1 Au1 S1 102.32(6) 2_565 2_565 ?
C1 Au1 S1 176.86(6) . 2_565 ?
S1 Au1 S1 74.56(3) . 2_565 ?
C8 S1 Au1 85.91(9) . . ?
C4 O1 C7 116.75(17) . . ?
C8 N1 C9 121.62(12) . . ?
C8 N1 C9 121.62(12) . 2_565 ?
C9 N1 C9 116.8(2) . 2_565 ?
C2 C1 C6 119.29(19) . . ?
C2 C1 Au1 124.99(16) . . ?
C6 C1 Au1 115.72(15) . . ?
C1 C2 C3 120.89(19) . . ?
C1 C2 H2 119.6 . . ?
C3 C2 H2 119.6 . . ?
C4 C3 C2 119.4(2) . . ?
C4 C3 H3 120.3 . . ?
C2 C3 H3 120.3 . . ?
O1 C4 C3 124.2(2) . . ?
O1 C4 C5 115.53(18) . . ?
C3 C4 C5 120.23(19) . . ?
C6 C5 C4 120.02(19) . . ?
C6 C5 H5 120.0 . . ?
C4 C5 H5 120.0 . . ?
C5 C6 C1 120.20(19) . . ?
C5 C6 C6 125.93(12) . 2_565 ?
C1 C6 C6 113.87(12) . 2_565 ?
O1 C7 H7A 109.5 . . ?
O1 C7 H7B 109.5 . . ?
H7A C7 H7B 109.5 . . ?
O1 C7 H7C 109.5 . . ?
H7A C7 H7C 109.5 . . ?
H7B C7 H7C 109.5 . . ?
N1 C8 S1 123.20(9) . . ?
N1 C8 S1 123.20(9) . 2_565 ?
S1 C8 S1 113.61(18) . 2_565 ?
N1 C9 C10 112.87(17) . . ?
N1 C9 H9A 109.0 . . ?
C10 C9 H9A 109.0 . . ?
N1 C9 H9B 109.0 . . ?
C10 C9 H9B 109.0 . . ?
H9A C9 H9B 107.8 . . ?
C9 C10 H10A 109.5 . . ?
C9 C10 H10B 109.5 . . ?
H10A C10 H10B 109.5 . . ?
C9 C10 H10C 109.5 . . ?
H10A C10 H10C 109.5 . . ?
H10B C10 H10C 109.5 . . ?

loop_
_geom_torsion_atom_site_label_1
_geom_torsion_atom_site_label_2
_geom_torsion_atom_site_label_3
_geom_torsion_atom_site_label_4
_geom_torsion
_geom_torsion_site_symmetry_1
_geom_torsion_site_symmetry_2
_geom_torsion_site_symmetry_3
_geom_torsion_site_symmetry_4
_geom_torsion_publ_flag
C6 C1 C2 C3 1.1(3) . . . . ?
Au1 C1 C2 C3 -178.65(17) . . . . ?
C1 C2 C3 C4 -0.8(3) . . . . ?
C7 O1 C4 C3 -0.2(3) . . . . ?
C7 O1 C4 C5 -179.9(2) . . . . ?
C2 C3 C4 O1 -179.6(2) . . . . ?
C2 C3 C4 C5 0.0(3) . . . . ?
O1 C4 C5 C6 -179.9(2) . . . . ?
C3 C4 C5 C6 0.4(3) . . . . ?
C4 C5 C6 C1 -0.1(3) . . . . ?
C4 C5 C6 C6 -179.9(3) . . . 2_565 ?
C2 C1 C6 C5 -0.6(3) . . . . ?
Au1 C1 C6 C5 179.10(17) . . . . ?
C2 C1 C6 C6 179.2(2) . . . 2_565 ?
Au1 C1 C6 C6 -1.1(3) . . . 2_565 ?
C9 N1 C8 S1 7.01(10) . . . . ?
C9 N1 C8 S1 -172.99(10) 2_565 . . . ?
C9 N1 C8 S1 -172.99(10) . . . 2_565 ?
C9 N1 C8 S1 7.01(10) 2_565 . . 2_565 ?
Au1 S1 C8 N1 180.000(1) . . . . ?
Au1 S1 C8 S1 0.000(0) . . . 2_565 ?
C8 N1 C9 C10 -93.56(18) . . . . ?
C9 N1 C9 C10 86.44(18) 2_565 . . . ?

_refine_diff_density_max         0.824
_refine_diff_density_min         -0.864
_refine_diff_density_rms         0.081

_shelxl_version_number           2013-4

_shelx_res_file                  
;
TITL LAK7814 in Pnna
CELL 0.71073 9.6573 14.9056 13.0267 90.000 90.000 90.000
ZERR 4.0000 0.0007 0.0011 0.0010 0.000 0.000 0.000
LATT 1
SYMM 0.5-X, -Y, Z
SYMM X, 0.5-Y, 0.5-Z
SYMM 0.5-X, 0.5+Y, 0.5-Z
SFAC C H N O S AU
UNIT 76 88 4 8 8 4
MERG 2
FMAP 2
GRID
PLAN 20
TEMP -173
SIZE 0.15 0.25 0.4
BOND $H
CONF

L.S. 10
ACTA
WGHT    0.013200    2.519100
FVAR       0.06950
AU1   6    0.250000    0.500000    0.281195    10.50000    0.01063    0.01477 =
         0.01002    0.00000    0.00000   -0.00062
S1    5    0.148350    0.571758    0.427589    11.00000    0.01598    0.01629 =
         0.01201    0.00020    0.00028    0.00130
O1    4   -0.008264    0.679927   -0.100757    11.00000    0.02047    0.02370 =
         0.01463    0.00260   -0.00035    0.00924
N1    3    0.250000    0.500000    0.601392    10.50000    0.01529    0.01435 =
         0.01373    0.00000    0.00000   -0.00325
C1    1    0.159112    0.565489    0.162783    11.00000    0.01081    0.01724 =
         0.01280    0.00178   -0.00074   -0.00169
C2    1    0.063863    0.634358    0.172798    11.00000    0.01581    0.02091 =
         0.01436   -0.00198    0.00381    0.00157
AFIX  43
H2    2    0.038588    0.654697    0.239323    11.00000   -1.20000
AFIX   0
C3    1    0.004229    0.674470    0.086109    11.00000    0.01363    0.02005 =
         0.01978    0.00060    0.00212    0.00441
AFIX  43
H3    2   -0.061873    0.721200    0.093720    11.00000   -1.20000
AFIX   0
C4    1    0.042733    0.645225   -0.011106    11.00000    0.01257    0.01793 =
         0.01589    0.00217   -0.00067    0.00043
C5    1    0.140205    0.576259   -0.022177    11.00000    0.01445    0.01882 =
         0.01194   -0.00051    0.00098    0.00162
AFIX  43
H5    2    0.166675    0.556699   -0.088753    11.00000   -1.20000
AFIX   0
C6    1    0.197926    0.536628    0.063854    11.00000    0.01010    0.01487 =
         0.01688   -0.00062    0.00105   -0.00032
C7    1   -0.107879    0.750669   -0.091768    11.00000    0.01791    0.02024 =
         0.02035    0.00226   -0.00161    0.00570
AFIX 137
H7A   2   -0.190196    0.728304   -0.055983    11.00000   -1.50000
H7B   2   -0.134027    0.771638   -0.160384    11.00000   -1.50000
H7C   2   -0.067580    0.800472   -0.052787    11.00000   -1.50000
AFIX   0
C8    1    0.250000    0.500000    0.500508    10.50000    0.01302    0.01182 =
         0.01708    0.00000    0.00000   -0.00339
C9    1    0.151168    0.554582    0.660662    11.00000    0.01696    0.01889 =
         0.01299   -0.00178    0.00232   -0.00028
AFIX  23
H9A   2    0.125339    0.521703    0.723858    11.00000   -1.20000
H9B   2    0.066041    0.563200    0.619483    11.00000   -1.20000
AFIX   0
C10   1    0.208844    0.645615    0.690040    11.00000    0.02259    0.02290 =
         0.02416   -0.00744    0.00120   -0.00221
AFIX 137
H10A  2    0.296860    0.637733    0.726379    11.00000   -1.50000
H10B  2    0.142820    0.676620    0.734819    11.00000   -1.50000
H10C  2    0.224138    0.681344    0.627914    11.00000   -1.50000
AFIX   0
HKLF 4

REM  LAK7814 in Pnna
REM R1 =  0.0139 for    1855 Fo > 4sig(Fo)  and  0.0177 for all    2168 data
REM    117 parameters refined using      0 restraints

END

WGHT      0.0132      2.5191

REM Highest difference peak  0.824,  deepest hole -0.864,  1-sigma level  0.081
Q1    1   0.2508  0.4419  0.2781  11.00000  0.05    0.82
Q2    1   0.1808  0.5672  0.1041  11.00000  0.05    0.35
Q3    1   0.1787  0.6033  0.6696  11.00000  0.05    0.34
Q4    1   0.0927  0.6105 -0.0136  11.00000  0.05    0.33
Q5    1   0.0244  0.6581  0.0380  11.00000  0.05    0.33
Q6    1   0.2500  0.5000  0.2185  10.50000  0.05    0.32
Q7    1   0.1167  0.6002  0.1590  11.00000  0.05    0.31
Q8    1   0.2500  0.5000  0.4060  10.50000  0.05    0.31
Q9    1   0.0182  0.6609 -0.0436  11.00000  0.05    0.30
Q10   1   0.0306  0.6416  0.1241  11.00000  0.05    0.30
Q11   1   0.1780  0.5701  0.0264  11.00000  0.05    0.30
Q12   1   0.2458  0.6598  0.6575  11.00000  0.05    0.25
Q13   1   0.1688  0.4926  0.3148  11.00000  0.05    0.25
Q14   1   0.2446  0.5259  0.0671  11.00000  0.05    0.25
Q15   1  -0.1996  0.7362 -0.0996  11.00000  0.05    0.24
Q16   1   0.1629  0.7793  0.6464  11.00000  0.05    0.23
Q17   1  -0.0659  0.7072 -0.0969  11.00000  0.05    0.23
Q18   1  -0.0022  0.6712 -0.1507  11.00000  0.05    0.23
Q19   1   0.2079  0.5331  0.6363  11.00000  0.05    0.23
Q20   1  -0.0279  0.7217 -0.0981  11.00000  0.05    0.23
;
_shelx_res_checksum              48581

_shelx_hkl_file                  
;
   1   0   0    0.23    0.09
  -1   0   0    0.08    0.07
  -1   0   0    0.05    0.05
   1   0   0   -0.01    0.04
  -2   0   0  450.73    9.65
   2   0   0  450.41    9.74
   2   0   0  442.27   10.27
  -2   0   0  460.43    9.86
  -3   0   0   -0.01    0.08
  -3   0   0   -0.01    0.07
   3   0   0   -0.02    0.05
   3   0   0   -0.17    0.09
  -4   0   0  234.87    5.22
   4   0   0  229.74    5.35
   4   0   0  233.84    5.34
  -4   0   0  226.53    5.20
  -5   0   0   -0.10    0.11
   5   0   0   -0.07    0.19
  -5   0   0   -0.12    0.15
   5   0   0   -0.18    0.08
   6   0   0   67.32    1.69
  -6   0   0   66.08    1.90
  -6   0   0   65.69    1.76
   6   0   0   67.83    2.04
   7   0   0    0.20    0.26
  -7   0   0    0.05    0.19
  -7   0   0   -0.29    0.13
  -8   0   0  230.71    5.38
   8   0   0  225.86    5.72
  -8   0   0  221.79    5.53
  -9   0   0   -0.11    0.26
   9   0   0   -0.08    0.33
  10   0   0  171.35    4.78
 -10   0   0  175.82    4.69
 -11   0   0    0.06    0.40
  11   0   0    0.76    0.48
  12   0   0   78.88    2.83
 -12   0   0   84.09    2.88
   0   0  -1    0.01    0.02
   0   0  -1    0.01    0.03
   0   0   1   -0.02    0.02
  -1   0   1  428.71    9.00
   1   0   1  420.40    9.09
   1   0   1  423.65    9.31
   1   0  -1  413.13    9.06
   1   0  -1  414.02    9.71
  -1   0  -1  448.72    9.72
  -2   0  -1   -0.05    0.08
   2   0   1   -0.05    0.11
   2   0  -1   -0.08    0.09
  -2   0   1    0.08    0.07
  -2   0   1   -0.14    0.07
  -2   0  -1   -0.07    0.10
  -2   0  -1    0.00    0.07
   2   0  -1   -0.03    0.06
   3   0  -1  159.76    3.75
  -3   0   1  164.55    3.67
  -3   0  -1  160.35    3.72
   3   0  -1  162.91    3.80
   3   0   1  164.37    3.79
  -3   0   1  160.12    3.64
  -3   0  -1  164.55    3.72
  -3   0  -1  164.13    3.79
   4   0  -1    0.08    0.14
  -4   0   1   -0.09    0.10
   4   0   1    0.19    0.15
  -4   0   1    0.00    0.08
  -4   0  -1   -0.02    0.07
   4   0  -1   -0.04    0.06
  -4   0  -1   -0.01    0.12
  -4   0  -1   -0.02    0.09
   5   0  -1  206.17    4.91
  -5   0   1  206.58    4.71
  -5   0   1  199.88    4.74
  -5   0  -1  200.49    4.80
   5   0   1  211.15    4.94
   5   0  -1  207.54    4.83
  -5   0  -1  208.62    4.77
  -5   0  -1  207.59    4.81
  -6   0  -1   -0.01    0.13
  -6   0  -1   -0.06    0.09
   6   0   1    0.09    0.22
  -6   0   1   -0.10    0.15
  -6   0   1   -0.19    0.11
  -6   0  -1   -0.10    0.17
   6   0  -1    0.25    0.25
   6   0  -1   -0.09    0.09
   7   0  -1  138.79    3.72
  -7   0  -1  136.55    3.59
   7   0   1  136.44    3.71
  -7   0   1  142.44    3.39
  -7   0   1  138.82    3.54
  -7   0  -1  141.26    3.44
  -8   0   1   -0.29    0.14
  -8   0  -1   -0.37    0.17
   8   0   1    0.07    0.29
   8   0  -1    0.03    0.31
  -8   0  -1    0.28    0.27
  -8   0   1   -0.09    0.22
   9   0   1  135.42    3.79
  -9   0   1  132.03    3.65
   9   0  -1  130.28    3.81
  -9   0  -1  134.14    3.71
 -10   0   1    0.20    0.32
  10   0  -1    0.52    0.40
  10   0   1   -0.27    0.34
 -10   0  -1    0.09    0.32
  11   0  -1   92.67    3.10
 -11   0  -1   90.14    2.99
  11   0   1   96.33    3.05
 -11   0   1   90.43    2.98
 -12   0   1    0.02    0.44
 -12   0  -1   -0.13    0.39
  12   0   1    0.08    0.49
  12   0  -1    0.34    0.55
   0   0  -2   63.66    1.63
   0   0   2   66.27    1.41
   0   0  -2   66.99    1.43
   0   0   2   63.52    1.51
   1   0  -2   -0.05    0.08
  -1   0   2   -0.13    0.04
  -1   0  -2    0.02    0.07
  -1   0   2   -0.13    0.05
   1   0   2    0.04    0.06
   1   0   2   -0.07    0.07
   1   0  -2   -0.06    0.05
  -1   0  -2    0.08    0.09
   2   0  -2  363.63    8.10
   2   0   2  367.47    8.32
   2   0   2  371.35    8.14
  -2   0   2  381.45    8.23
   2   0  -2  370.82    8.65
  -2   0  -2  387.20    8.15
  -2   0  -2  381.45    8.66
   3   0   2    0.03    0.13
  -3   0   2   -0.15    0.07
  -3   0  -2    0.16    0.14
   3   0   2    0.21    0.12
   3   0  -2   -0.12    0.11
   3   0  -2    0.12    0.09
  -3   0   2   -0.20    0.06
  -3   0  -2    0.09    0.09
   4   0   2  251.01    5.86
   4   0  -2  254.21    5.97
  -4   0  -2  252.51    5.81
  -4   0  -2  265.06    5.97
  -4   0  -2  256.78    5.84
   4   0   2  256.35    5.84
  -4   0   2  261.96    5.73
  -4   0   2  252.72    5.67
   4   0  -2  248.46    5.82
  -5   0  -2    0.01    0.15
   5   0  -2   -0.03    0.09
  -5   0  -2    0.01    0.10
  -5   0   2   -0.06    0.09
   5   0  -2    0.02    0.17
  -5   0  -2    0.02    0.12
   5   0   2    0.04    0.17
  -5   0   2    0.06    0.14
   6   0  -2  247.26    5.76
  -6   0  -2  247.86    5.72
   6   0   2  242.27    5.85
  -6   0   2  242.71    5.61
  -6   0  -2  254.43    5.76
  -6   0  -2  242.27    5.77
  -6   0   2  243.48    5.65
   6   0  -2  238.01    5.83
  -7   0  -2   -0.05    0.20
   7   0   2    0.02    0.25
  -7   0   2    0.00    0.14
  -7   0  -2   -0.15    0.15
  -7   0   2   -0.20    0.19
   7   0  -2   -0.13    0.23
  -8   0   2   73.65    2.06
  -8   0   2   75.66    2.27
  -8   0  -2   82.42    2.22
   8   0   2   78.12    2.42
  -8   0  -2   76.05    2.37
   8   0  -2   74.94    2.45
   9   0   2   -0.13    0.32
  -9   0  -2   -0.35    0.27
   9   0  -2    0.20    0.37
  -9   0   2   -0.33    0.23
 -10   0  -2   54.89    2.03
  10   0  -2   59.00    2.23
  10   0   2   54.87    2.06
 -10   0   2   52.60    1.98
 -11   0  -2   -0.10    0.38
  11   0  -2   -0.30    0.45
  11   0   2    0.65    0.43
 -11   0   2   -0.61    0.33
 -12   0   2   58.29    2.31
  12   0   2   55.86    2.22
  12   0  -2   56.64    2.34
 -12   0  -2   60.78    2.30
   0   0  -3    0.06    0.09
   0   0  -3    0.04    0.05
   0   0   3   -0.03    0.04
   0   0   3   -0.09    0.05
   1   0  -3   62.26    1.63
   1   0   3   61.77    1.52
  -1   0  -3   63.18    1.44
  -1   0  -3   59.22    1.62
   1   0   3   62.82    1.40
   1   0  -3   61.04    1.39
  -1   0   3   61.84    1.47
  -1   0   3   60.91    1.38
   2   0   3    0.22    0.10
  -2   0  -3    0.02    0.09
   2   0  -3    0.31    0.10
  -2   0   3   -0.01    0.06
  -2   0  -3    0.03    0.09
   2   0   3    0.16    0.10
   2   0  -3   -0.01    0.07
  -2   0   3    0.03    0.06
   3   0   3  303.32    6.81
   3   0  -3  297.99    6.78
  -3   0  -3  316.83    6.85
  -3   0   3  312.15    6.67
  -3   0  -3  307.13    7.20
   3   0   3  305.35    6.97
   3   0  -3  305.99    7.20
  -3   0   3  311.70    6.84
   4   0  -3   -0.08    0.14
  -4   0   3   -0.08    0.10
  -4   0  -3    0.39    0.17
  -4   0   3   -0.08    0.07
   4   0   3    0.03    0.15
   4   0  -3    0.10    0.11
  -4   0  -3    0.05    0.11
   4   0   3    0.11    0.14
   5   0  -3  324.25    7.51
   5   0   3  325.08    7.56
  -5   0  -3  324.95    7.48
  -5   0   3  335.74    7.32
  -5   0   3  326.45    7.39
   5   0  -3  335.44    7.72
   5   0   3  331.45    7.51
  -5   0  -3  334.62    7.72
   6   0   3   -0.09    0.20
  -6   0   3    0.03    0.12
  -6   0  -3    0.16    0.19
  -6   0   3    0.11    0.17
   6   0  -3   -0.03    0.20
   6   0  -3    0.03    0.12
   6   0   3    0.23    0.18
  -7   0   3  153.87    3.85
  -7   0   3  158.75    3.75
   7   0   3  154.82    4.00
   7   0   3  155.37    3.90
  -7   0  -3  157.41    4.00
   7   0  -3  152.92    4.05
  -8   0  -3    0.06    0.25
  -8   0   3    0.18    0.18
   8   0  -3   -0.43    0.25
   8   0   3    0.15    0.25
  -8   0   3    0.00    0.22
   8   0   3   -0.08    0.26
   9   0   3   59.32    2.05
  -9   0   3   59.47    1.97
  -9   0  -3   59.39    2.04
   9   0  -3   57.37    2.13
  10   0   3    0.31    0.39
 -10   0  -3   -0.10    0.29
  10   0  -3    0.30    0.44
 -10   0   3   -0.18    0.32
  11   0  -3   61.47    2.40
 -11   0   3   58.64    2.21
  11   0   3   62.33    2.24
 -11   0  -3   60.32    2.21
 -12   0   3   -0.41    0.37
 -12   0  -3   -0.23    0.37
  12   0  -3    0.03    0.53
  12   0   3    0.63    0.53
   0   0  -4   45.88    1.08
   0   0   4   46.35    1.05
   1   0   4    0.02    0.05
   1   0   4   -0.04    0.08
   1   0  -4    0.01    0.05
   1   0  -4    0.06    0.05
   1   0  -4   -0.08    0.08
  -1   0   4   -0.05    0.05
  -1   0  -4    0.07    0.11
  -1   0  -4    0.06    0.06
  -2   0   4  216.64    4.66
  -2   0  -4  221.14    4.79
   2   0  -4  213.56    5.17
   2   0   4  221.28    4.74
  -2   0   4  214.10    4.85
  -2   0  -4  200.20    5.17
   2   0  -4  212.70    4.72
   2   0   4  219.52    4.96
  -3   0   4    0.16    0.09
   3   0  -4    0.03    0.11
  -3   0   4    0.53    0.12
  -3   0  -4    0.15    0.13
  -3   0  -4   -0.08    0.10
   3   0  -4    0.04    0.12
   3   0   4    0.19    0.13
   3   0   4    0.02    0.11
  -4   0   4  129.90    3.01
   4   0  -4  131.71    3.25
   4   0   4  130.41    3.15
  -4   0  -4  132.85    3.20
  -4   0  -4  131.69    3.26
   4   0  -4  129.88    3.15
  -4   0   4  128.86    3.06
   4   0   4  126.39    3.20
  -5   0  -4   -0.02    0.12
   5   0  -4    0.08    0.13
  -5   0  -4    0.02    0.17
  -5   0   4    0.15    0.14
   5   0   4   -0.10    0.17
   5   0  -4    0.15    0.18
  -5   0   4   -0.10    0.10
   5   0   4   -0.14    0.14
  -6   0   4  153.49    3.59
   6   0   4  149.16    3.71
  -6   0   4  144.71    3.53
   6   0   4  145.89    3.71
  -6   0  -4  144.75    3.73
   6   0  -4  148.63    3.67
   6   0  -4  152.58    3.80
   7   0   4   -0.12    0.22
   7   0   4    0.24    0.22
   7   0  -4    0.30    0.29
  -7   0   4    0.04    0.15
   7   0  -4   -0.11    0.15
  -7   0   4    0.08    0.22
  -7   0  -4    0.11    0.23
   8   0   4   47.64    1.67
  -8   0  -4   44.69    1.64
  -8   0   4   48.86    1.61
   8   0   4   47.74    1.57
  -8   0   4   45.77    1.42
   8   0  -4   47.54    1.77
  -9   0   4    0.25    0.31
  -9   0  -4    0.00    0.28
   9   0   4   -0.16    0.28
   9   0  -4    0.35    0.35
 -10   0  -4   54.99    2.00
  10   0  -4   56.12    2.21
 -10   0   4   57.56    2.01
  10   0   4   56.20    2.01
 -11   0   4   -0.15    0.35
  11   0  -4   -0.03    0.51
  11   0   4    0.08    0.40
 -11   0  -4   -0.06    0.34
 -12   0   4   15.07    1.23
  12   0   4   15.41    1.13
  12   0  -4   14.68    1.33
 -12   0  -4   14.97    1.06
   0   0   5   -0.08    0.08
   0   0  -5    0.17    0.14
   0   0  -5   -0.03    0.06
   0   0   5    0.11    0.06
   1   0  -5  203.50    5.13
   1   0  -5  211.97    4.54
   1   0  -5  216.14    4.55
   1   0   5  210.48    4.83
   1   0   5  211.60    4.54
  -1   0  -5  204.45    5.15
  -1   0  -5  208.49    4.59
  -1   0   5  211.18    4.78
  -2   0  -5   -0.11    0.09
  -2   0  -5   -0.20    0.11
   2   0  -5    0.11    0.14
   2   0   5    0.30    0.14
   2   0   5    0.06    0.09
   2   0  -5    0.06    0.09
  -2   0   5    0.00    0.07
  -2   0   5    0.20    0.10
  -3   0  -5  109.12    2.69
   3   0   5  109.32    2.63
  -3   0   5  113.61    2.53
   3   0  -5  111.51    2.88
   3   0  -5  112.60    2.64
  -3   0  -5  109.84    2.89
  -3   0   5  112.33    2.65
   3   0   5  105.08    2.77
   4   0   5    0.21    0.17
  -4   0  -5    0.01    0.14
  -4   0   5   -0.18    0.10
   4   0   5    0.04    0.14
   4   0  -5   -0.05    0.13
   4   0  -5   -0.29    0.13
  -4   0  -5    0.08    0.16
  -4   0   5   -0.15    0.10
   5   0   5   23.84    0.91
  -5   0   5   24.51    0.82
   5   0  -5   24.75    0.88
  -5   0  -5   24.40    0.89
  -5   0   5   24.97    0.81
   5   0   5   24.93    0.95
  -5   0  -5   24.01    0.96
   5   0  -5   24.70    0.96
  -6   0   5   -0.17    0.12
   6   0   5    0.11    0.22
   6   0   5   -0.06    0.19
  -6   0  -5    0.03    0.21
   6   0  -5    0.05    0.15
  -6   0   5    0.35    0.19
   6   0  -5   -0.05    0.20
  -7   0   5   40.04    1.22
  -7   0   5   39.29    1.31
   7   0  -5   40.11    1.25
   7   0  -5   41.02    1.52
  -7   0  -5   37.64    1.40
   7   0   5   38.10    1.38
   7   0   5   39.41    1.36
   8   0   5   -0.35    0.22
   8   0   5   -0.23    0.27
  -8   0   5   -0.01    0.18
  -8   0   5    0.16    0.25
  -8   0  -5    0.37    0.27
   8   0  -5   -0.35    0.30
  -9   0  -5   42.96    1.64
  -9   0   5   43.27    1.58
   9   0   5   43.29    1.63
   9   0  -5   41.57    1.75
  10   0  -5   -0.16    0.42
  10   0   5   -0.37    0.35
 -10   0  -5    0.21    0.32
 -10   0   5    0.30    0.36
 -11   0   5   23.53    1.27
  11   0   5   21.74    1.23
  11   0  -5   25.15    1.47
 -11   0  -5   21.85    1.22
   0   0  -6  113.96    3.10
   0   0  -6  117.26    2.61
   0   0   6  118.66    2.56
   0   0   6  114.59    2.81
  -1   0  -6   -0.05    0.08
   1   0   6   -0.07    0.11
   1   0   6   -0.02    0.07
  -1   0   6    1.43    0.20
  -1   0  -6    0.26    0.17
   1   0  -6    0.00    0.15
   1   0  -6   -0.11    0.07
   2   0  -6   22.78    0.91
   2   0   6   24.72    0.86
   2   0   6   24.20    0.68
  -2   0  -6   23.46    0.75
  -2   0  -6   21.60    0.92
   2   0  -6   24.08    0.70
  -2   0   6   24.22    0.77
  -2   0   6   24.09    0.67
  -3   0  -6    0.03    0.17
  -3   0   6   -0.26    0.10
  -3   0  -6    0.08    0.14
   3   0   6   -0.08    0.11
   3   0  -6    0.08    0.13
  -3   0   6   -0.02    0.10
   3   0   6    0.07    0.15
   3   0  -6   -0.06    0.16
  -4   0  -6   37.60    1.26
  -4   0   6   37.19    1.10
   4   0  -6   37.88    1.18
   4   0  -6   38.31    1.24
   4   0   6   36.64    1.24
  -4   0   6   39.04    1.06
   4   0   6   36.49    1.14
  -4   0  -6   36.07    1.20
   5   0  -6    0.23    0.18
   5   0   6   -0.02    0.18
   5   0  -6    0.13    0.20
  -5   0   6    0.09    0.15
  -5   0  -6   -0.10    0.16
  -5   0  -6   -0.01    0.16
   5   0   6    0.23    0.19
  -5   0   6   -0.11    0.12
  -6   0   6    3.54    0.37
  -6   0  -6    4.11    0.47
   6   0  -6    6.63    0.60
   6   0   6    3.95    0.44
   6   0   6    3.86    0.43
   6   0  -6    4.02    0.40
  -6   0   6    4.08    0.35
  -7   0   6    0.19    0.18
   7   0  -6   -0.13    0.27
   7   0   6   -0.17    0.22
  -7   0   6    0.12    0.22
  -7   0  -6   -0.10    0.22
   7   0   6   -0.10    0.21
   7   0  -6   -0.03    0.19
   8   0   6   55.31    1.81
  -8   0  -6   54.57    1.85
   8   0  -6   53.04    1.97
   8   0   6   55.54    1.79
  -8   0   6   57.70    1.78
  -8   0   6   56.78    1.66
   9   0  -6   -0.17    0.37
  -9   0   6    0.01    0.30
  -9   0  -6   -0.10    0.26
   9   0   6    0.04    0.33
 -10   0  -6    3.16    0.54
  10   0   6    4.13    0.61
  10   0  -6    3.48    0.70
 -10   0   6    3.62    0.57
  11   0   6   -0.14    0.41
  11   0  -6   -0.19    0.51
 -11   0  -6    0.03    0.36
 -11   0   6   -0.28    0.33
   0   0  -7   -0.11    0.08
   0   0   7   -0.10    0.07
   0   0  -7   -0.35    0.15
   0   0   7    0.48    0.17
   1   0   7   12.12    0.57
  -1   0   7   13.30    0.56
   1   0  -7   13.02    0.42
   1   0   7   12.54    0.40
   1   0  -7   13.28    0.70
   1   0  -7   12.20    0.43
  -1   0  -7   12.77    0.47
   2   0  -7   -0.07    0.10
   2   0  -7    0.02    0.16
  -2   0  -7    0.33    0.22
   2   0   7   -0.11    0.14
  -2   0  -7   -0.05    0.10
   2   0   7   -0.03    0.09
  -2   0   7    0.10    0.10
  -2   0   7    0.09    0.13
  -3   0   7    3.15    0.23
   3   0  -7    3.79    0.41
   3   0   7    3.32    0.28
  -3   0  -7    3.10    0.40
   3   0  -7    2.93    0.29
   3   0   7    4.43    0.43
  -3   0  -7    2.92    0.30
  -3   0   7    3.43    0.31
  -4   0  -7    0.18    0.19
   4   0   7    0.12    0.18
   4   0   7    0.29    0.17
  -4   0  -7    0.00    0.16
  -4   0   7   -0.03    0.13
  -4   0   7    0.19    0.14
   4   0  -7    0.51    0.20
   4   0  -7   -0.02    0.15
   5   0   7    3.11    0.35
  -5   0  -7    2.55    0.37
   5   0  -7    3.00    0.37
  -5   0   7    1.91    0.27
   5   0   7    1.40    0.30
   5   0  -7    2.34    0.35
  -5   0  -7    3.80    0.42
  -5   0   7    2.40    0.28
   6   0   7    0.19    0.22
  -6   0  -7    0.51    0.24
  -6   0   7    0.07    0.18
   6   0  -7    0.00    0.18
  -6   0   7    0.02    0.16
   6   0  -7    0.51    0.28
   6   0   7    0.19    0.24
  -7   0  -7    4.52    0.52
   7   0   7    4.18    0.50
  -7   0   7    4.60    0.42
   7   0   7    4.30    0.48
   7   0  -7    4.84    0.58
   7   0  -7    4.03    0.43
  -7   0   7    5.20    0.48
   8   0  -7   -0.10    0.34
   8   0   7    0.17    0.31
  -8   0   7   -0.13    0.19
   8   0   7   -0.38    0.25
  -8   0   7   -0.46    0.23
  -8   0  -7    0.03    0.28
   9   0  -7   10.71    0.98
  -9   0   7   11.24    0.75
  -9   0  -7    8.93    0.79
   9   0   7    9.36    0.79
  10   0   7    0.21    0.40
 -10   0  -7   -0.22    0.34
  10   0  -7   -0.27    0.48
  11   0  -7    0.17    0.55
  11   0   7    0.67    0.44
 -11   0  -7    0.11    0.40
   0   0  -8   23.83    0.71
   0   0   8   22.94    0.86
   0   0  -8   24.15    1.06
   0   0   8   24.01    0.64
  -1   0  -8    0.03    0.11
   1   0  -8   -0.24    0.09
   1   0   8   -0.05    0.09
  -1   0  -8    0.06    0.18
   1   0  -8    0.02    0.18
   1   0   8    0.27    0.17
   1   0  -8    0.19    0.11
  -1   0   8    1.49    0.24
   2   0  -8    7.41    0.56
  -2   0   8    7.37    0.45
  -2   0  -8    7.93    0.41
  -2   0   8    8.09    0.35
   2   0  -8    7.21    0.36
   2   0   8    7.50    0.33
   2   0   8    7.73    0.50
  -2   0  -8    7.25    0.57
   3   0   8    0.52    0.22
  -3   0  -8    0.24    0.15
  -3   0   8    0.05    0.13
  -3   0   8    0.04    0.12
   3   0  -8   -0.06    0.18
   3   0  -8   -0.07    0.14
  -3   0  -8    0.25    0.23
   3   0   8    0.00    0.13
   4   0   8   14.59    0.77
  -4   0   8   15.43    0.64
  -4   0  -8   14.13    0.67
   4   0   8   14.03    0.60
  -4   0   8   14.60    0.56
   4   0  -8   14.91    0.67
   4   0  -8   13.04    0.72
  -4   0  -8   13.48    0.77
   5   0  -8    0.09    0.21
  -5   0   8    0.14    0.17
  -5   0   8    0.04    0.16
  -5   0  -8    0.25    0.23
  -5   0  -8    0.60    0.25
   5   0   8    0.10    0.18
   5   0   8    0.27    0.23
   5   0  -8    0.15    0.21
   6   0   8    8.12    0.67
  -6   0   8    9.83    0.53
   6   0  -8    9.53    0.62
   6   0  -8    7.83    0.68
  -6   0   8    8.66    0.53
   6   0   8    9.05    0.57
  -6   0  -8    8.24    0.60
  -7   0   8    0.06    0.20
   7   0   8   -0.18    0.23
   7   0  -8    0.11    0.31
  -7   0  -8   -0.16    0.22
  -7   0   8    0.09    0.24
   7   0   8    0.83    0.32
   7   0  -8   -0.03    0.23
   8   0   8    0.28    0.32
  -8   0   8    0.91    0.29
   8   0   8    0.85    0.35
  -8   0  -8    1.09    0.37
   8   0  -8    0.78    0.43
   9   0   8    0.33    0.36
  -9   0  -8   -0.40    0.27
   9   0  -8    0.26    0.44
 -10   0  -8    1.49    0.45
  10   0   8    1.03    0.43
  10   0  -8   -0.42    0.42
  11   0   8   -0.08    0.44
  11   0  -8   -0.12    0.56
   0   0  -9   -0.13    0.20
   0   0   9   -0.05    0.14
   0   0  -9    0.13    0.12
  -1   0  -9   40.29    1.11
   1   0   9   40.58    1.33
   1   0  -9   39.14    1.53
  -1   0   9   43.08    1.30
  -1   0  -9   38.23    1.53
   1   0  -9   40.13    1.07
  -2   0   9    0.13    0.18
   2   0  -9   -0.07    0.19
  -2   0  -9    0.08    0.25
   2   0   9   -0.04    0.17
   2   0  -9    0.62    0.16
  -2   0   9   -0.03    0.11
  -2   0  -9    0.19    0.14
  -3   0  -9    2.54    0.31
  -3   0   9    3.07    0.35
   3   0  -9    2.31    0.41
   3   0  -9    2.64    0.30
  -3   0   9    2.76    0.26
   3   0   9    2.34    0.37
  -3   0  -9    2.08    0.39
   4   0  -9    0.05    0.25
   4   0   9    0.01    0.22
  -4   0  -9   -0.04    0.19
  -4   0  -9    0.14    0.25
  -4   0   9    0.01    0.17
  -4   0   9    0.02    0.15
   4   0  -9    0.19    0.20
   5   0   9    1.50    0.29
   5   0  -9    1.50    0.34
   5   0   9    1.79    0.37
  -5   0  -9    1.62    0.37
  -5   0   9    1.60    0.26
  -5   0  -9    0.92    0.29
   5   0  -9    1.72    0.35
  -5   0   9    1.06    0.25
   6   0  -9   -0.08    0.23
   6   0   9    0.00    0.24
  -6   0  -9   -0.07    0.23
  -6   0   9   -0.22    0.18
   6   0  -9   -0.60    0.25
   7   0   9    2.21    0.43
  -7   0  -9    1.29    0.36
  -7   0   9    1.83    0.32
   7   0  -9    2.14    0.40
   7   0  -9    1.99    0.46
   8   0   9   -0.14    0.29
   8   0  -9    0.19    0.39
  -8   0   9   -0.28    0.21
  -8   0  -9   -0.05    0.28
  -9   0  -9   17.73    1.00
   9   0  -9   19.27    1.22
 -10   0  -9    0.52    0.40
   0   0 -10   54.39    1.42
   0   0 -10   53.99    1.98
   0   0  10   56.95    1.70
   1   0 -10   -0.03    0.13
  -1   0  10    0.62    0.23
   1   0  10    0.15    0.21
  -1   0 -10   -0.07    0.22
  -1   0 -10    0.26    0.15
   1   0 -10    0.04    0.23
  -2   0 -10    6.60    0.41
  -2   0  10    7.65    0.39
   2   0 -10    7.39    0.69
  -2   0 -10    7.43    0.72
   2   0  10    8.01    0.57
  -2   0  10    7.69    0.50
  -3   0  10   -0.07    0.17
   3   0 -10    0.16    0.27
   3   0  10    0.58    0.28
  -3   0 -10   -0.10    0.23
  -3   0 -10   -0.04    0.17
  -4   0 -10   63.85    1.84
  -4   0  10   64.11    1.86
  -4   0 -10   65.54    2.17
   4   0 -10   62.95    2.11
   4   0  10   61.52    2.02
   5   0  10    0.04    0.28
   5   0 -10    0.09    0.27
  -5   0  10    0.29    0.22
  -5   0 -10   -0.20    0.26
  -5   0 -10   -0.35    0.21
   6   0 -10   24.82    1.16
   6   0  10   26.80    1.20
  -6   0 -10   27.90    1.14
  -6   0  10   27.09    1.05
   7   0 -10   -0.32    0.25
  -7   0 -10    0.14    0.28
  -7   0  10   -0.05    0.23
   7   0  10   -0.19    0.27
  -8   0 -10   26.69    1.21
  -8   0  10   27.93    1.12
   8   0  10   27.69    1.25
  -9   0 -10    0.08    0.30
 -10   0 -10    2.91    0.55
   0   0 -11   -0.04    0.27
   0   0 -11   -0.21    0.13
   0   0  11    0.19    0.21
  -1   0 -11    2.58    0.28
   1   0 -11    2.71    0.50
  -1   0  11    2.82    0.38
   1   0  11    2.42    0.38
  -1   0 -11    2.57    0.50
   2   0  11   -0.22    0.22
  -2   0 -11    0.01    0.29
  -2   0  11   -0.01    0.20
   2   0 -11    0.27    0.28
  -2   0 -11   -0.15    0.15
  -3   0 -11   56.95    2.09
   3   0  11   59.77    1.95
  -3   0 -11   57.27    1.66
  -3   0  11   57.20    1.77
   3   0 -11   60.50    2.10
  -4   0  11    0.01    0.20
  -4   0 -11   -0.19    0.27
   4   0 -11   -0.07    0.27
  -4   0 -11    0.29    0.23
   4   0  11   -0.27    0.25
  -5   0 -11   69.60    2.05
  -5   0 -11   74.40    2.37
   5   0  11   69.01    2.22
  -5   0  11   67.64    2.03
   5   0 -11   65.01    2.26
  -6   0  11    0.18    0.24
   6   0  11    0.19    0.33
   6   0 -11    0.25    0.31
  -6   0 -11   -0.23    0.25
   7   0  11   40.71    1.60
  -7   0  11   40.88    1.43
  -7   0 -11   39.39    1.51
   7   0 -11   43.82    1.63
   8   0  11   -0.47    0.32
  -8   0  11    0.13    0.27
  -8   0 -11    0.01    0.28
  -9   0 -11    6.52    0.71
   0   0  12    4.07    0.50
   0   0 -12    3.55    0.60
  -1   0  12    0.25    0.23
   1   0 -12    0.14    0.30
  -1   0 -12    0.14    0.32
   1   0  12   -0.15    0.24
  -2   0 -12   69.06    2.45
   2   0 -12   63.89    2.38
  -2   0  12   67.37    2.04
   2   0  12   67.75    2.15
   3   0  12    0.03    0.26
   3   0 -12    0.16    0.29
  -3   0 -12   -0.26    0.19
  -3   0  12   -0.28    0.21
  -3   0 -12   -0.08    0.32
  -4   0  12   80.11    2.33
  -4   0 -12   85.98    2.72
   4   0  12   78.31    2.50
  -4   0 -12   82.78    2.24
   4   0 -12   72.27    2.59
  -5   0 -12   -0.27    0.22
  -5   0 -12   -0.12    0.33
   5   0  12    0.19    0.34
   5   0 -12    0.19    0.31
  -5   0  12    0.01    0.23
  -6   0  12   77.40    2.27
   6   0  12   75.52    2.44
   6   0 -12   70.57    2.47
  -6   0 -12   79.29    2.31
   7   0  12    0.27    0.35
  -7   0  12    0.09    0.28
   7   0 -12   -0.10    0.31
  -7   0 -12   -0.03    0.30
   8   0  12   20.82    1.16
  -8   0  12   22.29    1.05
  -8   0 -12   22.43    1.13
   0   0  13    0.34    0.28
   0   0 -13   -0.14    0.31
   1   0 -13  106.24    3.44
   1   0  13  107.23    3.05
  -1   0 -13  102.35    3.42
  -2   0  13   -0.32    0.25
   2   0  13   -0.39    0.25
  -2   0 -13    0.14    0.36
   2   0 -13    0.30    0.36
   3   0 -13   81.15    2.86
  -3   0 -13   92.59    2.98
   3   0  13   83.47    2.65
  -3   0  13   85.80    2.51
  -4   0 -13   -0.29    0.34
   4   0  13   -0.60    0.24
   4   0 -13   -0.30    0.28
  -4   0  13   -0.20    0.22
  -5   0  13   39.68    1.47
   5   0  13   40.51    1.65
   5   0 -13   39.16    1.69
   6   0 -13    0.09    0.34
  -6   0 -13   -0.12    0.30
   6   0  13   -0.29    0.34
  -6   0  13   -0.10    0.27
  -7   0  13   42.40    1.56
   7   0  13   42.38    1.72
   7   0 -13   40.93    1.72
  -7   0 -13   43.37    1.60
  -8   0  13    0.04    0.33
  -8   0 -13   -0.21    0.30
   8   0  13   -0.41    0.34
   0   0  14  118.11    3.30
   0   0 -14  110.56    3.70
   1   0 -14   -0.09    0.35
  -1   0 -14    0.08    0.40
  -1   0  14    0.16    0.31
   1   0  14    0.03    0.32
   2   0 -14  111.48    3.62
  -2   0 -14  110.42    3.60
  -2   0  14  109.48    3.11
   2   0  14  106.33    3.22
   3   0  14   -0.19    0.31
  -3   0  14    0.39    0.31
  -3   0 -14    0.00    0.36
   3   0 -14   -0.42    0.33
  -4   0 -14   45.29    1.87
   4   0 -14   40.83    1.80
   4   0  14   35.47    1.61
  -4   0  14   38.12    1.49
  -5   0  14    0.06    0.28
   5   0  14   -0.26    0.33
   5   0 -14    0.24    0.39
  -6   0  14   34.33    1.39
   6   0  14   37.23    1.60
   6   0 -14   33.20    1.60
   7   0  14   -0.36    0.40
  -7   0  14   -0.05    0.33
   7   0 -14    0.03    0.40
   0   0 -15    0.62    0.46
   0   0  15    0.06    0.35
  -1   0 -15   93.44    3.23
  -1   0  15   90.75    2.77
   1   0  15   89.03    2.82
   1   0 -15   85.76    3.19
   2   0 -15    0.07    0.41
  -2   0  15    0.31    0.32
  -2   0 -15   -0.14    0.39
   2   0  15   -0.23    0.31
  -3   0 -15   83.74    2.96
   3   0  15   78.72    2.66
  -3   0  15   76.69    2.50
   3   0 -15   86.44    3.03
  -4   0 -15   -0.25    0.41
  -4   0  15   -0.24    0.28
   4   0  15   -0.34    0.37
   4   0 -15    0.20    0.41
   5   0  15   43.06    1.83
   5   0 -15   43.19    1.94
  -5   0  15   45.00    1.69
   0   0 -16   76.13    2.93
   0   0  16   70.90    2.46
   1   0  16    0.07    0.36
  -1   0  16   -0.03    0.35
   1   0 -16    0.11    0.45
  -1   0 -16   -0.26    0.42
  -2   0  16   45.84    1.79
  -2   0 -16   50.13    2.20
   2   0  16   46.46    1.91
   2   0 -16   44.58    2.14
   3   0  16   -0.57    0.38
  -3   0  16   -0.07    0.34
  -3   0 -16    0.33    0.49
   3   0 -16    0.07    0.45
  -4   0 -16   65.56    2.56
   1  -1   0   -0.13    0.09
   1  -1   0    1.03    0.13
   1   1   0    0.43    0.10
  -1   1   0    0.25    0.09
  -1  -1   0    0.26    0.10
  -1  -1   0    0.77    0.12
   2   1   0   51.04    1.27
  -2  -1   0   49.65    1.28
  -2   1   0   53.00    1.20
   2  -1   0   50.57    1.27
  -2   1   0   52.72    1.24
  -2  -1   0   52.66    1.25
   3  -1   0    0.17    0.15
  -3   1   0   -0.01    0.10
   3   1   0   -0.16    0.10
  -3   1   0    0.10    0.07
  -3  -1   0    0.20    0.12
   3   1   0    0.11    0.05
   3  -1   0    0.02    0.07
  -3  -1   0   -0.08    0.08
   4   1   0    8.04    0.46
   4   1   0    8.16    0.26
   4  -1   0    8.77    0.52
  -4   1   0    7.80    0.33
  -4  -1   0    7.76    0.43
   4  -1   0    8.02    0.33
  -4   1   0    7.97    0.41
  -4  -1   0    8.38    0.37
   5   1   0    0.13    0.08
   5   1   0    0.29    0.20
   5  -1   0   -0.03    0.10
  -5  -1   0    0.11    0.18
   5  -1   0    0.59    0.25
  -5   1   0    0.50    0.19
  -5  -1   0    0.11    0.14
  -5   1   0    0.18    0.12
   6  -1   0    1.55    0.19
  -6   1   0    1.44    0.28
   6  -1   0    1.50    0.34
   6   1   0    1.59    0.32
  -6   1   0    1.89    0.23
  -6  -1   0    1.35    0.29
  -6  -1   0    1.37    0.23
  -7  -1   0    0.10    0.16
  -7   1   0    0.11    0.21
   7   1   0    0.01    0.23
  -7  -1   0    0.07    0.20
   7  -1   0    0.27    0.26
  -7   1   0    0.16    0.15
  -8  -1   0    7.75    0.71
  -8   1   0    8.33    0.51
  -8   1   0    7.81    0.69
   8   1   0    9.18    0.82
   8  -1   0    8.25    0.79
  -8  -1   0    7.95    0.53
  -9   1   0   -0.07    0.25
   9  -1   0    0.12    0.36
   9   1   0    0.56    0.39
  -9  -1   0    0.26    0.31
  -9  -1   0    0.45    0.23
  10  -1   0   -0.30    0.36
 -10   1   0   -0.01    0.35
  10   1   0   -0.40    0.37
 -10  -1   0    0.20    0.34
 -11   1   0   -0.24    0.34
 -11  -1   0    0.42    0.42
  11  -1   0    0.73    0.47
  11   1   0    0.61    0.46
 -12   1   0    6.32    0.87
 -12  -1   0    4.55    0.75
  12  -1   0    4.72    0.78
  12   1   0    4.01    0.81
   0   1   1   16.05    0.43
   0   1  -1   16.19    0.48
   0  -1   1   15.86    0.40
   0  -1   1   15.84    0.39
   0  -1  -1   15.60    0.43
  -1  -1   1    0.07    0.05
  -1  -1   1    0.06    0.05
   1   1   1    0.01    0.05
  -1   1  -1   -0.05    0.05
   1  -1  -1   -0.05    0.05
   1  -1  -1    0.66    0.10
  -1   1  -1    0.12    0.06
   1  -1   1    0.04    0.06
  -1   1   1    0.02    0.03
  -1  -1  -1    0.21    0.05
   1  -1   1    0.07    0.04
   1   1  -1    0.10    0.05
  -1  -1  -1   -0.03    0.05
  -1  -1  -1    0.09    0.06
  -1   1   1   -0.01    0.04
   1   1  -1    0.16    0.06
  -2   1  -1  111.49    2.50
   2   1   1  115.38    2.54
  -2  -1   1  110.20    2.51
  -2  -1   1  108.49    2.47
   2  -1  -1  108.61    2.58
   2  -1  -1  113.37    2.62
  -2   1  -1  109.92    2.62
  -2  -1  -1  113.36    2.57
  -2  -1  -1  110.27    2.56
   2   1  -1  111.75    2.60
  -2  -1  -1  106.46    2.55
   2  -1   1  109.32    2.53
   2   1  -1  109.47    2.50
   2  -1   1  104.68    2.56
  -2   1   1  111.90    2.46
   2  -1   1  106.22    2.61
  -2   1   1  112.13    2.46
  -3  -1   1    0.82    0.15
  -3  -1   1    0.58    0.11
   3  -1  -1    0.69    0.19
   3  -1  -1    0.55    0.11
   3   1   1    0.44    0.15
  -3   1  -1    0.80    0.15
  -3   1  -1    0.52    0.11
   3  -1   1    0.48    0.17
  -3  -1  -1    0.79    0.08
  -3   1   1    0.49    0.09
  -3   1   1    0.69    0.13
   3   1  -1    0.65    0.09
  -3  -1  -1    0.48    0.16
   3   1  -1    0.69    0.16
   3  -1   1    0.75    0.11
   4   1   1    0.33    0.17
   4  -1  -1    0.03    0.17
   4  -1  -1    0.33    0.11
  -4   1  -1    0.91    0.19
  -4   1  -1    0.54    0.13
  -4  -1   1    0.66    0.17
  -4  -1   1    0.40    0.12
  -4   1   1    0.33    0.10
  -4   1   1    0.95    0.18
  -4  -1  -1    0.61    0.18
   4  -1   1    0.43    0.11
   4   1  -1    0.31    0.08
   4   1  -1    0.68    0.19
  -4  -1  -1    0.63    0.08
  -4  -1  -1    0.31    0.12
   4  -1   1    0.45    0.20
   5  -1  -1    0.65    0.25
  -5  -1   1    0.62    0.15
  -5   1  -1    0.43    0.13
  -5  -1   1    0.33    0.16
   5  -1  -1    0.44    0.13
   5   1   1    0.73    0.23
  -5   1  -1    0.51    0.18
  -5  -1  -1    0.46    0.09
  -5   1   1    0.34    0.17
   5  -1   1    0.51    0.13
   5   1  -1    0.48    0.10
  -5  -1  -1    1.20    0.20
  -5   1   1    0.68    0.14
   5  -1   1    0.62    0.24
  -5  -1  -1    0.67    0.21
   5   1  -1    0.66    0.22
   6  -1  -1   12.15    0.48
   6  -1  -1   11.39    0.73
  -6  -1   1   13.24    0.66
   6   1   1   13.15    0.72
  -6   1  -1   12.14    0.64
  -6  -1   1   11.15    0.52
  -6   1  -1   13.06    0.55
   6   1  -1   13.08    0.71
  -6  -1  -1   13.62    0.71
  -6   1   1   13.10    0.64
   6   1  -1   12.02    0.42
   6  -1   1   12.85    0.74
  -6   1   1   12.18    0.50
  -6  -1  -1   12.42    0.58
   6  -1   1   13.14    0.50
  -7  -1   1    0.28    0.16
   7   1   1   -0.22    0.21
  -7   1  -1   -0.17    0.18
   7  -1  -1    0.03    0.26
  -7  -1   1    0.14    0.22
  -7   1  -1    0.01    0.15
   7   1  -1    0.06    0.24
  -7   1   1   -0.07    0.13
   7  -1   1   -0.12    0.24
  -7  -1  -1    0.75    0.29
  -7   1   1    0.09    0.19
  -7  -1  -1    0.04    0.15
   8  -1  -1   18.06    1.05
  -8  -1   1   18.92    0.80
   8   1   1   19.05    1.04
  -8  -1   1   19.60    0.97
  -8   1  -1   21.22    0.83
  -8   1  -1   19.80    1.00
   8  -1   1   17.73    1.01
  -8   1   1   19.53    0.77
  -8   1   1   19.27    0.94
  -8  -1  -1   18.60    0.99
  -8  -1  -1   19.90    0.85
   8   1  -1   18.81    1.03
  -9   1  -1    2.85    0.49
  -9  -1   1    2.94    0.39
   9   1   1    2.11    0.50
   9  -1  -1    3.57    0.62
  -9  -1   1    3.42    0.54
  -9  -1  -1    2.93    0.41
  -9   1   1    2.74    0.47
  -9  -1  -1    2.56    0.48
   9   1  -1    3.41    0.61
   9  -1   1    2.80    0.53
  10  -1  -1   23.55    1.34
 -10   1  -1   23.88    1.27
  10   1   1   22.98    1.32
 -10  -1   1   22.66    1.22
 -10  -1  -1   22.76    1.23
 -10   1   1   23.70    1.21
  10  -1   1   24.38    1.27
  10   1  -1   23.45    1.32
  11  -1  -1    0.00    0.42
 -11  -1   1    0.24    0.37
  11   1   1   -0.01    0.42
 -11   1  -1    0.80    0.43
 -11  -1  -1    0.22    0.38
 -11   1   1    0.31    0.42
  11   1  -1    0.27    0.46
  11  -1   1    0.06    0.40
  12   1   1    7.50    0.91
  12  -1  -1    5.81    0.85
 -12  -1   1    7.61    0.92
 -12   1  -1    7.07    0.89
 -12   1   1    5.49    0.80
  12  -1   1    8.50    0.93
 -12  -1  -1    7.39    0.87
  12   1  -1    6.98    0.91
   0  -1   2   -0.12    0.04
   0   1  -2   -0.08    0.03
   0   1  -2    0.40    0.11
   0   1   2   -0.11    0.06
   0  -1  -2    0.10    0.08
   0  -1   2    0.00    0.06
   0  -1  -2   -0.15    0.04
  -1   1  -2   12.01    0.46
  -1  -1   2   12.29    0.31
  -1  -1   2   11.61    0.37
  -1   1  -2   12.27    0.40
   1  -1  -2   12.64    0.38
   1   1   2   12.26    0.37
   1  -1  -2   12.95    0.42
   1   1   2   11.88    0.44
  -1  -1   2   12.62    0.35
   1   1  -2   11.91    0.35
  -1   1   2   13.34    0.36
  -1   1   2   12.55    0.34
   1  -1   2   12.73    0.36
   1   1  -2   12.55    0.44
  -1  -1  -2   12.12    0.41
   1  -1   2   12.74    0.38
  -1  -1  -2   12.78    0.38
  -2  -1   2    0.24    0.08
   2   1   2   -0.05    0.10
  -2   1  -2    0.29    0.11
  -2   1  -2   -0.09    0.09
   2   1   2    0.07    0.10
   2  -1  -2    0.33    0.12
   2  -1  -2    0.00    0.07
  -2  -1   2    0.01    0.07
  -2   1   2   -0.05    0.07
   2  -1   2    0.05    0.09
  -2  -1  -2    0.15    0.09
  -2  -1  -2    0.10    0.10
  -2   1   2    0.10    0.06
   2  -1   2    0.03    0.10
   2   1  -2    0.10    0.08
   2   1  -2    0.10    0.08
  -3   1  -2   20.55    0.70
   3  -1  -2   22.20    0.65
  -3  -1   2   20.78    0.63
  -3   1  -2   20.56    0.65
   3  -1  -2   21.07    0.74
  -3  -1   2   21.15    0.61
   3   1   2   20.59    0.71
  -3  -1  -2   19.59    0.68
   3   1  -2   22.18    0.63
   3   1  -2   20.96    0.68
  -3  -1  -2   20.92    0.74
  -3   1   2   20.81    0.57
  -3  -1  -2   18.55    0.59
  -3   1   2   20.91    0.63
   3  -1   2   20.87    0.67
   3  -1   2   19.41    0.72
  -4  -1   2    0.06    0.09
  -4  -1   2    0.22    0.14
  -4   1  -2    0.18    0.14
   4   1   2    0.16    0.16
   4  -1  -2    0.17    0.11
  -4   1  -2    0.15    0.10
   4  -1  -2    0.12    0.16
  -4   1   2    0.12    0.09
   4   1  -2    0.29    0.16
  -4   1   2    0.90    0.17
   4   1  -2    0.11    0.09
  -4  -1  -2    0.20    0.09
   4  -1   2    0.06    0.16
  -4  -1  -2    0.24    0.16
  -4  -1  -2    0.12    0.11
   4  -1   2    0.09    0.12
  -5   1  -2    6.72    0.45
  -5   1  -2    6.78    0.33
   5  -1  -2    6.42    0.33
  -5  -1   2    5.77    0.34
  -5  -1   2    6.90    0.43
   5  -1  -2    6.25    0.54
   5   1   2    6.27    0.46
  -5  -1  -2    6.39    0.46
  -5  -1  -2    6.17    0.27
   5   1  -2    6.16    0.29
   5   1  -2    6.74    0.48
  -5   1   2    6.96    0.33
  -5  -1  -2    5.91    0.39
   5  -1   2    6.11    0.38
  -5   1   2    6.45    0.39
   5  -1   2    6.36    0.47
  -6  -1   2    0.29    0.19
   6   1   2    0.55    0.27
  -6  -1   2    0.50    0.16
  -6   1  -2    0.70    0.16
   6  -1  -2    0.34    0.14
   6  -1  -2    0.23    0.24
  -6   1  -2    0.43    0.22
  -6   1   2    0.65    0.16
   6   1  -2    0.37    0.12
  -6  -1  -2    0.30    0.17
   6  -1   2    0.48    0.25
   6  -1   2    0.39    0.17
   6   1  -2    0.48    0.24
  -6   1   2   -0.06    0.17
  -6  -1  -2    0.22    0.20
  -7  -1   2   29.35    1.16
  -7  -1   2   31.32    1.04
   7  -1  -2   30.74    0.97
   7  -1  -2   32.10    1.36
   7   1   2   31.15    1.29
  -7   1  -2   31.62    1.24
  -7   1   2   31.65    0.99
  -7  -1  -2   32.28    1.13
   7  -1   2   32.24    1.08
   7  -1   2   33.96    1.30
  -7  -1  -2   33.44    1.26
   7   1  -2   31.88    1.28
  -7   1   2   30.68    1.14
  -8  -1   2    3.03    0.46
   8   1   2    2.90    0.50
  -8   1  -2    3.07    0.48
   8  -1  -2    3.44    0.57
  -8  -1   2    3.83    0.39
  -8  -1  -2    3.06    0.40
   8  -1   2    3.45    0.40
  -8  -1  -2    3.01    0.46
  -8   1   2    4.19    0.52
  -8   1   2    3.21    0.34
   8  -1   2    2.86    0.48
   8   1  -2    2.98    0.52
  -9  -1   2   34.14    1.20
   9  -1  -2   32.03    1.54
  -9   1  -2   31.80    1.43
  -9  -1   2   32.02    1.39
   9   1   2   35.42    1.52
   9  -1   2   34.15    1.45
  -9  -1  -2   32.89    1.27
   9   1  -2   32.53    1.48
  -9   1   2   32.19    1.36
  -9  -1  -2   35.16    1.44
  10  -1  -2    0.00    0.39
 -10  -1   2    0.59    0.37
  10   1   2    0.29    0.39
 -10   1  -2    0.43    0.35
  10  -1   2    0.08    0.35
  10   1  -2    0.00    0.39
 -10  -1  -2    0.33    0.33
 -10   1   2    0.48    0.35
  11  -1  -2   16.56    1.17
  11   1   2   18.57    1.19
 -11  -1   2   15.76    1.11
 -11   1  -2   16.55    1.13
  11   1  -2   16.64    1.23
  11  -1   2   16.73    1.09
 -11   1   2   15.91    1.06
 -11  -1  -2   15.38    1.05
  12   1   2    0.25    0.49
 -12  -1   2    0.36    0.44
  12  -1  -2   -0.08    0.52
 -12   1  -2   -0.16    0.42
 -12  -1  -2    0.35    0.46
 -12   1   2    0.36    0.43
  12  -1   2    0.47    0.50
  12   1  -2    0.54    0.55
   0   1   3  179.05    3.80
   0   1  -3  174.95    4.31
   0  -1   3  184.36    3.87
   0   1  -3  183.86    3.83
   0  -1  -3  170.84    4.28
   0  -1  -3  185.71    3.88
   0  -1   3  174.92    4.02
   1   1   3    4.35    0.18
  -1  -1   3    4.38    0.18
  -1  -1   3    4.13    0.15
   1  -1  -3    4.21    0.19
   1   1   3    4.41    0.25
  -1  -1   3    3.92    0.20
  -1   1  -3    3.97    0.28
   1  -1  -3    3.94    0.26
  -1   1  -3    4.69    0.22
   1  -1   3    4.17    0.22
  -1   1   3    4.46    0.19
  -1  -1  -3    4.48    0.21
  -1   1   3    4.06    0.20
  -1  -1  -3    4.81    0.27
   1  -1   3    4.16    0.18
   2  -1  -3  137.41    3.45
  -2  -1   3  145.52    3.26
   2   1   3  141.33    3.23
  -2   1  -3  145.96    3.28
  -2  -1   3  141.61    3.11
   2  -1  -3  140.86    3.23
   2   1   3  133.60    3.37
  -2   1  -3  146.24    3.51
   2  -1   3  145.41    3.31
   2  -1   3  147.82    3.23
   2   1  -3  139.36    3.46
  -2  -1  -3  138.01    3.45
  -2  -1  -3  148.53    3.25
  -2   1   3  141.48    3.14
  -2   1   3  147.11    3.23
   2   1  -3  140.68    3.18
  -3   1  -3    9.04    0.42
  -3  -1   3    8.83    0.36
   3   1   3    8.89    0.44
   3  -1  -3    8.31    0.44
  -3   1  -3    8.05    0.43
   3   1   3    9.22    0.46
   3  -1  -3    9.10    0.40
  -3  -1   3    9.39    0.35
   3   1  -3    8.77    0.39
   3  -1   3    8.32    0.39
  -3  -1  -3    8.02    0.37
  -3   1   3    8.93    0.33
   3   1  -3    8.58    0.39
  -3   1   3    9.32    0.36
  -3  -1  -3    8.45    0.44
   3  -1   3    7.57    0.41
  -4  -1   3   76.33    1.88
  -4   1  -3   76.03    2.00
  -4  -1   3   78.16    1.89
   4  -1  -3   77.36    1.98
   4   1   3   75.91    2.03
   4   1   3   75.20    2.04
  -4   1  -3   75.89    2.03
   4  -1  -3   71.90    2.03
  -4  -1  -3   75.30    1.94
   4   1  -3   77.09    1.96
  -4   1   3   76.92    1.84
  -4   1   3   76.25    1.87
   4  -1   3   76.31    2.02
   4  -1   3   78.48    1.98
   4   1  -3   75.15    1.97
   5  -1  -3    1.22    0.28
   5   1   3    0.93    0.25
  -5   1  -3    1.06    0.19
  -5  -1   3    1.08    0.18
  -5  -1   3    0.83    0.20
   5   1   3    1.05    0.24
  -5   1  -3    0.94    0.24
   5   1  -3    1.13    0.17
   5  -1   3    1.12    0.26
  -5  -1  -3    1.14    0.17
   5   1  -3    0.63    0.22
   5  -1   3    1.42    0.24
  -5   1   3    0.85    0.15
  -5   1   3    0.82    0.20
  -5  -1  -3    0.59    0.21
  -6  -1   3   53.40    1.58
   6  -1  -3   53.87    1.77
  -6   1  -3   55.43    1.71
   6  -1  -3   51.58    1.48
   6   1   3   49.86    1.69
  -6  -1   3   51.74    1.48
   6   1   3   54.20    1.63
  -6   1  -3   54.20    1.51
  -6   1   3   56.89    1.58
   6  -1   3   56.71    1.59
   6   1  -3   53.99    1.45
   6  -1   3   52.45    1.68
   6   1  -3   55.65    1.72
  -6  -1  -3   52.86    1.68
  -6   1   3   54.50    1.44
  -7   1  -3    0.79    0.30
   7   1   3    1.18    0.29
   7   1   3    0.57    0.31
  -7  -1   3    0.94    0.25
   7  -1  -3    0.73    0.20
   7  -1  -3    0.99    0.38
  -7  -1   3    1.07    0.22
  -7  -1  -3    0.56    0.26
   7  -1   3    1.05    0.27
   7   1  -3    1.24    0.36
   7  -1   3    0.65    0.29
  -7   1   3    0.95    0.26
  -7   1   3    0.92    0.19
   8   1   3   42.94    1.48
   8   1   3   44.45    1.64
   8  -1  -3   41.20    1.70
  -8   1  -3   41.49    1.58
  -8  -1   3   41.82    1.34
  -8  -1   3   44.80    1.54
   8  -1   3   42.70    1.42
   8   1  -3   44.48    1.66
  -8  -1  -3   42.25    1.56
  -8   1   3   41.64    1.29
  -8   1   3   42.74    1.50
   8  -1   3   40.63    1.55
   9   1   3    1.34    0.37
   9   1   3    1.25    0.42
   9  -1  -3    0.72    0.46
  -9  -1   3    1.47    0.30
  -9  -1   3    1.66    0.42
  -9   1  -3    1.39    0.41
  -9  -1  -3    1.47    0.40
   9  -1   3    1.21    0.42
  -9   1   3    0.96    0.35
   9   1  -3    1.01    0.45
 -10   1  -3   24.39    1.26
 -10  -1   3   22.23    1.19
  10   1   3   28.10    1.35
  10  -1  -3   25.07    1.39
 -10  -1  -3   23.79    1.23
  10  -1   3   25.23    1.25
 -10   1   3   23.37    1.19
  10   1  -3   21.08    1.27
 -11   1  -3   -0.03    0.35
  11   1   3    0.70    0.49
 -11  -1   3    0.07    0.37
  11  -1  -3   -0.22    0.40
  11   1  -3    0.56    0.49
 -11  -1  -3    0.51    0.39
  11  -1   3   -0.12    0.41
 -11   1   3    0.89    0.41
  12  -1  -3    9.61    1.06
 -12  -1   3   10.93    1.10
 -12   1  -3   12.01    1.08
  12   1   3   10.26    1.03
  12  -1   3   10.49    1.01
  12   1  -3    9.38    1.09
 -12   1   3    7.33    0.91
 -12  -1  -3    9.30    0.94
   0  -1  -4   -0.02    0.09
   0  -1  -4   -0.04    0.04
   0   1  -4   -0.13    0.09
   0  -1   4    0.04    0.05
   0   1   4   -0.05    0.06
   0  -1   4    0.05    0.07
   0   1   4    0.04    0.03
   0   1  -4    0.02    0.04
  -1  -1   4   31.43    0.77
   1  -1  -4   31.79    0.76
  -1   1  -4   30.56    0.80
  -1   1  -4   28.91    0.99
   1   1   4   30.64    0.73
  -1  -1   4   31.01    0.73
  -1  -1   4   31.33    0.85
   1   1   4   30.10    0.91
   1  -1  -4   31.41    0.77
  -1  -1  -4   30.83    0.81
   1  -1   4   30.78    0.87
   1   1  -4   32.03    1.00
  -1   1   4   32.67    0.85
  -1  -1  -4   29.78    0.98
   1  -1   4   30.52    0.77
   2  -1  -4    2.55    0.26
   2   1   4    2.16    0.19
  -2  -1   4    2.64    0.15
   2  -1  -4    2.58    0.22
   2   1   4    2.78    0.28
  -2   1  -4    2.64    0.24
  -2   1  -4    2.78    0.29
  -2  -1   4    2.49    0.21
  -2  -1  -4    2.73    0.23
  -2  -1  -4    2.58    0.27
  -2   1   4    2.62    0.19
   2  -1   4    3.04    0.21
  -2   1   4    2.70    0.17
   2   1  -4    2.22    0.24
   2   1  -4    2.74    0.19
   2  -1   4    2.22    0.22
  -3   1  -4  287.95    6.78
  -3  -1   4  288.12    6.37
  -3  -1   4  287.76    6.16
   3  -1  -4  285.42    6.73
   3  -1  -4  278.16    6.33
   3   1   4  291.57    6.31
  -3   1  -4  290.01    6.36
   3   1   4  281.26    6.53
  -3   1   4  285.41    6.17
  -3   1   4  290.05    6.34
  -3  -1  -4  262.59    6.71
  -3  -1  -4  284.95    6.34
   3  -1   4  277.32    6.46
   3   1  -4  280.92    6.26
   3  -1   4  286.32    6.31
   3   1  -4  281.50    6.73
  -4   1  -4    4.83    0.42
   4   1   4    4.15    0.39
  -4  -1   4    4.55    0.29
   4  -1  -4    4.39    0.32
  -4  -1   4    4.85    0.30
   4   1   4    4.61    0.40
  -4   1  -4    5.64    0.37
   4  -1  -4    4.47    0.41
   4  -1   4    5.10    0.36
   4  -1   4    4.58    0.39
  -4   1   4    5.46    0.29
   4   1  -4    5.12    0.33
   4   1  -4    4.81    0.35
  -4  -1  -4    4.36    0.33
  -4   1   4    4.72    0.30
  -4  -1  -4    4.45    0.40
   5   1   4  273.36    6.37
   5   1   4  270.48    6.24
  -5   1  -4  281.07    6.49
  -5   1  -4  270.01    6.25
  -5  -1   4  268.15    6.06
   5  -1  -4  266.91    6.45
   5  -1  -4  268.61    6.32
  -5  -1   4  271.50    6.17
   5  -1   4  275.20    6.29
   5  -1   4  271.59    6.22
  -5   1   4  268.32    6.11
  -5   1   4  268.54    6.05
   5   1  -4  260.83    6.20
   5   1  -4  277.12    6.44
  -5  -1  -4  270.15    6.42
  -6  -1   4    0.11    0.14
   6  -1  -4    0.16    0.25
   6   1   4   -0.11    0.18
  -6   1  -4    0.19    0.21
   6   1   4   -0.02    0.21
   6  -1  -4    0.18    0.16
  -6  -1   4    0.16    0.18
  -6   1  -4    0.43    0.18
  -6  -1  -4    0.74    0.26
  -6   1   4    0.11    0.13
   6   1  -4   -0.04    0.21
   6  -1   4    0.09    0.22
  -6   1   4    0.00    0.17
   6   1  -4    0.22    0.14
   6  -1   4    0.17    0.17
   7   1   4  108.95    2.92
  -7  -1   4  105.12    2.82
   7  -1  -4  105.30    2.77
  -7   1  -4  107.81    2.96
  -7  -1   4  106.93    2.73
   7   1   4  109.41    2.96
   7  -1  -4  106.45    3.07
  -7   1   4  108.69    2.68
  -7   1   4  106.96    2.80
   7  -1   4  112.28    2.85
  -7  -1  -4  103.20    2.91
   7   1  -4  109.55    3.00
   7  -1   4  107.31    2.93
   8   1   4   -0.34    0.22
  -8  -1   4    0.41    0.26
   8  -1  -4    0.06    0.35
  -8  -1   4    0.01    0.18
   8   1   4    0.26    0.30
  -8   1  -4    0.27    0.27
   8  -1   4   -0.16    0.27
  -8   1   4    0.12    0.17
   8  -1   4    0.11    0.23
  -8   1   4    0.13    0.23
   8   1  -4   -0.29    0.25
  -8  -1  -4    0.08    0.22
  -9   1  -4   19.00    1.05
  -9  -1   4   19.22    0.87
   9   1   4   19.36    1.05
  -9  -1   4   21.32    1.05
   9  -1  -4   18.44    1.16
   9   1   4   21.42    1.02
   9  -1   4   19.69    1.06
   9   1  -4   22.17    1.18
  -9   1   4   23.31    1.08
  -9  -1  -4   19.86    1.05
 -10  -1   4    1.08    0.42
  10   1   4    0.58    0.41
  10  -1  -4    0.65    0.44
 -10   1  -4    1.33    0.45
  10   1  -4    1.39    0.52
  10  -1   4    0.42    0.41
 -10  -1  -4    1.14    0.39
 -10   1   4    0.53    0.35
  11   1   4   10.96    1.00
  11  -1  -4    9.29    1.04
 -11   1  -4   11.03    0.98
 -11  -1   4   11.91    1.03
  11   1  -4    9.52    1.05
  11  -1   4   10.31    0.96
 -11   1   4    9.97    0.92
 -11  -1  -4   13.24    0.96
  12  -1  -4    0.70    0.54
 -12  -1   4    0.65    0.46
  12   1   4    0.47    0.49
 -12   1   4    0.31    0.45
  12   1  -4    1.08    0.57
  12  -1   4    0.73    0.52
   0  -1   5  148.01    3.20
   0  -1  -5  145.87    3.23
   0   1   5  144.68    3.14
   0   1  -5  149.86    3.18
   0  -1  -5  140.43    3.69
   0   1  -5  147.00    3.73
  -1  -1   5    0.03    0.07
   1   1   5    0.05    0.05
   1   1   5   -0.03    0.09
  -1  -1   5    0.12    0.09
   1  -1  -5   -0.03    0.06
  -1   1  -5   -0.06    0.06
  -1  -1   5    0.10    0.06
   1  -1  -5    0.08    0.07
   1  -1  -5    0.11    0.12
  -1   1  -5   -0.19    0.11
   1  -1   5    0.01    0.10
  -1  -1  -5    0.05    0.11
  -1  -1  -5   -0.07    0.06
   1  -1   5    0.06    0.07
  -1   1   5    0.17    0.10
   1   1  -5    0.21    0.14
  -2   1  -5  197.44    4.37
   2  -1  -5  198.23    4.33
  -2  -1   5  196.13    4.47
  -2  -1   5  195.56    4.22
   2   1   5  190.99    4.59
   2   1   5  198.91    4.29
  -2   1  -5  191.41    4.82
   2  -1   5  197.16    4.31
  -2   1   5  197.21    4.45
  -2  -1  -5  200.88    4.37
   2   1  -5  194.82    4.30
   2   1  -5  189.09    4.78
  -2   1   5  191.07    4.27
  -2  -1  -5  185.32    4.80
   2  -1   5  194.18    4.52
  -3  -1   5    1.57    0.17
   3  -1  -5    1.45    0.23
  -3   1  -5    1.49    0.26
   3  -1  -5    1.55    0.23
   3   1   5    1.20    0.23
   3   1   5    1.85    0.22
  -3   1  -5    1.39    0.23
  -3  -1   5    1.75    0.20
   3  -1   5    1.46    0.20
  -3   1   5    1.67    0.19
  -3  -1  -5    1.62    0.25
   3   1  -5    1.27    0.22
  -3   1   5    1.92    0.19
   3  -1   5    2.27    0.28
  -3  -1  -5    1.58    0.23
   3   1  -5    1.81    0.22
   4  -1  -5  289.57    6.63
  -4   1  -5  295.07    7.02
  -4  -1   5  300.33    6.41
   4   1   5  291.49    6.80
  -4   1  -5  297.07    6.62
  -4  -1   5  299.65    6.62
   4  -1  -5  290.17    6.98
   4   1   5  295.64    6.55
  -4   1   5  292.98    6.42
   4   1  -5  284.28    6.54
  -4  -1  -5  285.65    6.99
  -4  -1  -5  287.41    6.62
  -4   1   5  295.44    6.57
   4  -1   5  288.04    6.74
   4   1  -5  290.30    6.98
   4  -1   5  284.05    6.56
  -5  -1   5    2.05    0.25
   5  -1  -5    2.41    0.29
   5  -1  -5    2.42    0.37
  -5  -1   5    2.66    0.28
   5   1   5    2.23    0.31
  -5   1  -5    2.12    0.29
  -5   1  -5    2.12    0.33
   5   1   5    3.11    0.37
   5  -1   5    2.29    0.32
  -5   1   5    2.18    0.26
  -5   1   5    2.04    0.23
  -5  -1  -5    2.76    0.32
   5  -1   5    2.16    0.31
   5   1  -5    2.05    0.27
   5   1  -5    2.41    0.33
  -5  -1  -5    2.40    0.36
  -6   1  -5  131.51    3.35
   6  -1  -5  128.51    3.44
  -6  -1   5  131.53    3.19
   6   1   5  127.92    3.30
   6  -1  -5  125.64    3.31
   6   1   5  128.06    3.37
  -6  -1   5  128.01    3.17
  -6   1  -5  129.28    3.33
   6  -1   5  128.57    3.30
  -6  -1  -5  132.73    3.36
   6  -1   5  133.49    3.32
  -6   1   5  131.85    3.17
  -6   1   5  130.23    3.13
   6   1  -5  128.68    3.35
   6   1  -5  132.33    3.31
   7   1   5    1.92    0.37
  -7  -1   5    1.64    0.32
   7  -1  -5    2.06    0.44
  -7   1  -5    1.64    0.35
   7  -1  -5    1.43    0.27
  -7  -1   5    2.54    0.31
   7   1   5    2.08    0.36
  -7  -1  -5    2.68    0.41
  -7   1   5    1.65    0.25
   7  -1   5    2.23    0.35
   7  -1   5    2.36    0.39
   7   1  -5    1.82    0.40
  -7   1   5    2.31    0.36
   8   1   5   82.49    2.43
  -8  -1   5   84.35    2.40
  -8   1  -5   84.73    2.50
   8  -1  -5   82.67    2.65
  -8  -1   5   85.26    2.28
   8   1   5   82.84    2.46
   8   1  -5   79.69    2.55
   8  -1   5   84.33    2.37
   8  -1   5   83.38    2.45
  -8   1   5   81.99    2.36
  -8   1   5   83.23    2.22
   9   1   5    0.18    0.30
  -9  -1   5    0.21    0.23
   9  -1  -5    0.22    0.43
   9   1   5   -0.10    0.29
  -9   1  -5    0.24    0.29
  -9  -1   5   -0.23    0.28
  -9   1   5    0.02    0.30
  -9  -1  -5    0.42    0.30
   9   1  -5    0.20    0.39
   9  -1   5    0.09    0.32
  10  -1  -5   22.71    1.35
  10   1   5   21.98    1.16
 -10  -1   5   21.27    1.14
 -10   1  -5   20.86    1.13
  10   1  -5   18.65    1.22
 -10  -1  -5   20.22    1.10
 -10   1   5   20.33    1.10
  10  -1   5   20.37    1.10
  11  -1  -5   -0.74    0.46
  11   1   5   -0.02    0.43
 -11   1  -5   -0.61    0.31
 -11  -1   5   -0.40    0.36
  11  -1   5    0.07    0.38
 -11   1   5   -0.04    0.35
  11   1  -5   -0.49    0.41
 -11  -1  -5   -0.15    0.32
   0   1  -6    0.09    0.15
   0   1   6    0.00    0.05
   0  -1  -6   -0.12    0.06
   0  -1  -6    0.01    0.14
   0   1  -6    0.14    0.08
   0   1   6    0.10    0.11
   0  -1   6    0.05    0.10
   0  -1   6    0.12    0.08
   1  -1  -6  295.79    6.29
  -1   1  -6  266.63    7.05
  -1   1  -6  297.11    6.30
   1   1   6  291.51    6.22
   1   1   6  295.84    6.66
   1  -1  -6  280.36    7.04
  -1  -1   6  284.75    6.58
  -1  -1   6  288.71    6.29
   1  -1  -6  296.18    6.26
  -1  -1  -6  299.32    6.34
   1  -1   6  293.02    6.61
   1  -1   6  286.87    6.28
  -1   1   6  291.42    6.58
  -1  -1  -6  292.76    7.08
   1   1  -6  296.77    6.24
  -2   1  -6    6.97    0.36
   2   1   6    6.61    0.29
  -2   1  -6    6.29    0.47
   2  -1  -6    6.76    0.45
   2   1   6    7.28    0.44
   2  -1  -6    6.96    0.33
  -2  -1   6    7.60    0.28
  -2  -1  -6    6.34    0.46
   2   1  -6    6.54    0.31
   2  -1   6    6.44    0.31
  -2  -1  -6    7.37    0.37
   2  -1   6    7.22    0.41
  -2   1   6    6.35    0.35
   2   1  -6    6.20    0.44
  -2   1   6    7.09    0.31
  -3   1  -6  154.94    3.98
  -3   1  -6  150.18    3.62
  -3  -1   6  154.15    3.65
  -3  -1   6  157.57    3.45
   3  -1  -6  159.87    3.95
   3   1   6  147.24    3.80
   3   1   6  149.60    3.53
   3  -1  -6  161.33    3.62
  -3   1   6  156.05    3.48
  -3  -1  -6  141.79    3.95
   3   1  -6  154.70    3.55
  -3  -1  -6  160.52    3.65
  -3   1   6  156.33    3.63
   3  -1   6  156.06    3.56
   3  -1   6  154.49    3.76
   3   1  -6  153.60    3.95
   4   1   6    5.92    0.50
  -4  -1   6    4.89    0.34
  -4   1  -6    5.83    0.45
   4  -1  -6    6.05    0.44
  -4  -1   6    6.15    0.33
  -4   1  -6    5.35    0.46
   4   1   6    5.84    0.38
   4  -1  -6    6.20    0.46
   4  -1   6    5.10    0.38
  -4   1   6    5.90    0.34
   4   1  -6    5.77    0.43
  -4  -1  -6    5.50    0.47
  -4  -1  -6    5.32    0.47
  -4   1   6    5.47    0.33
   4   1  -6    6.19    0.41
   4  -1   6    5.03    0.44
   5   1   6  121.36    3.20
   5  -1  -6  128.44    3.20
  -5   1  -6  126.31    3.24
  -5  -1   6  121.54    3.01
   5   1   6  123.42    3.04
  -5   1  -6  121.63    3.12
   5  -1  -6  120.84    3.20
  -5  -1   6  125.30    2.93
  -5   1   6  121.57    2.93
  -5   1   6  119.47    2.97
  -5  -1  -6  122.75    3.14
  -5  -1  -6  125.22    3.23
   5   1  -6  122.77    3.20
   5   1  -6  120.34    3.09
   5  -1   6  120.88    3.15
   5  -1   6  119.71    3.06
   6  -1  -6    2.31    0.32
   6   1   6    2.22    0.35
  -6   1  -6    2.64    0.35
   6   1   6    2.85    0.39
   6  -1  -6    2.11    0.40
  -6  -1   6    2.45    0.30
  -6  -1   6    2.20    0.31
  -6   1  -6    3.41    0.44
   6  -1   6    1.92    0.34
  -6   1   6    2.94    0.34
   6  -1   6    2.47    0.37
  -6   1   6    3.20    0.31
   6   1  -6    2.48    0.32
   6   1  -6    2.66    0.39
  -6  -1  -6    2.16    0.38
  -7  -1   6  121.82    3.05
  -7  -1   6  117.18    3.06
   7  -1  -6  125.87    3.41
   7   1   6  122.21    3.17
   7  -1  -6  120.59    3.18
   7   1   6  116.03    3.22
  -7   1  -6  119.28    3.21
  -7  -1  -6  120.93    3.23
   7   1  -6  121.29    3.29
   7  -1   6  122.49    3.17
  -7   1   6  122.29    3.00
   7  -1   6  118.44    3.16
   7   1  -6  118.84    3.14
  -7   1   6  118.80    3.06
  -8   1  -6    0.41    0.30
   8   1   6    0.37    0.30
  -8  -1   6    0.24    0.22
  -8  -1   6    0.65    0.31
   8   1   6    0.30    0.32
   8  -1  -6   -0.15    0.32
   8   1  -6    0.23    0.35
  -8  -1  -6    0.03    0.25
  -8   1   6    0.08    0.20
  -8   1   6    0.30    0.25
   8  -1   6    0.47    0.27
   8  -1   6    0.53    0.30
  -9  -1   6  134.78    3.53
  -9   1  -6  134.85    3.72
  -9  -1   6  142.18    3.69
   9   1   6  140.54    3.71
   9   1   6  135.87    3.69
   9  -1  -6  136.53    3.99
  -9   1   6  138.33    3.65
   9  -1   6  139.37    3.69
   9   1  -6  135.59    3.89
  -9  -1  -6  133.90    3.71
 -10   1  -6    0.05    0.31
 -10  -1   6    0.20    0.36
  10   1   6   -0.14    0.34
  10  -1  -6    0.18    0.50
  10   1  -6    0.40    0.42
 -10   1   6   -0.15    0.29
 -10  -1  -6    0.27    0.33
  10  -1   6    0.36    0.40
 -11   1  -6   79.95    2.64
  11   1   6   80.08    2.60
  11  -1  -6   81.34    2.92
  11   1  -6   83.09    2.91
 -11   1   6   80.72    2.62
  11  -1   6   79.00    2.58
 -11  -1  -6   76.51    2.59
   0   1  -7  373.29    9.23
   0  -1   7  387.06    8.21
   0   1   7  381.17    8.14
   0  -1   7  372.07    8.60
   0   1  -7  388.06    8.19
   0  -1  -7  381.53    8.24
   0  -1  -7  386.41    9.24
  -1   1  -7    2.53    0.38
   1  -1  -7    3.10    0.38
   1   1   7    2.53    0.16
  -1  -1   7    2.70    0.28
  -1  -1   7    2.49    0.20
   1  -1  -7    2.55    0.22
  -1   1  -7    2.41    0.21
   1   1   7    2.68    0.32
   1  -1  -7    2.78    0.18
  -1  -1  -7    2.79    0.38
   1  -1   7    2.40    0.20
   1  -1   7    2.35    0.28
  -1   1   7    2.45    0.27
   1   1  -7    2.77    0.18
   1   1  -7    2.55    0.37
  -1  -1  -7    2.39    0.23
   2   1   7  227.41    5.00
  -2  -1   7  232.61    4.99
   2   1   7  227.88    5.43
   2  -1  -7  233.14    5.74
  -2   1  -7  220.95    5.76
  -2   1  -7  231.23    5.11
  -2  -1   7  226.31    5.30
   2  -1  -7  236.81    5.09
   2  -1   7  231.01    5.39
   2   1  -7  228.57    5.74
   2  -1   7  228.92    5.05
  -2   1   7  230.54    5.04
  -2  -1  -7  217.21    5.75
  -2  -1  -7  228.70    5.13
  -2   1   7  231.11    5.30
   2   1  -7  231.83    5.07
   3   1   7    1.77    0.22
  -3   1  -7    2.04    0.27
   3   1   7    1.77    0.30
  -3  -1   7    1.88    0.20
   3  -1  -7    1.94    0.31
   3  -1  -7    2.10    0.27
  -3   1  -7    2.27    0.36
  -3  -1   7    2.14    0.26
  -3  -1  -7    2.89    0.31
   3  -1   7    1.84    0.29
   3  -1   7    1.91    0.23
  -3   1   7    2.26    0.23
  -3   1   7    1.70    0.23
   3   1  -7    1.83    0.31
  -3  -1  -7    2.04    0.34
   3   1  -7    2.04    0.24
  -4   1  -7   84.43    2.26
  -4  -1   7   86.39    2.07
   4  -1  -7   88.32    2.28
  -4   1  -7   87.94    2.47
   4   1   7   84.64    2.15
   4  -1  -7   86.03    2.42
   4   1   7   88.85    2.41
  -4  -1   7   84.62    2.20
   4   1  -7   86.57    2.21
  -4   1   7   81.81    2.17
  -4  -1  -7   86.10    2.48
   4  -1   7   84.62    2.18
   4   1  -7   84.56    2.43
  -4   1   7   86.37    2.09
  -4  -1  -7   82.31    2.26
   4  -1   7   82.18    2.33
  -5  -1   7    0.51    0.18
   5   1   7    0.61    0.23
  -5   1  -7    0.66    0.25
  -5   1  -7    0.53    0.23
   5  -1  -7    0.76    0.27
  -5  -1   7    0.56    0.18
   5  -1  -7    0.61    0.23
   5   1   7    0.32    0.24
   5  -1   7    0.51    0.22
  -5   1   7    0.42    0.18
   5  -1   7    0.65    0.24
   5   1  -7    0.36    0.21
   5   1  -7    0.34    0.20
  -5  -1  -7    0.24    0.22
  -5   1   7    0.35    0.16
  -5  -1  -7    0.97    0.27
   6  -1  -7  105.76    2.84
   6   1   7   97.81    2.59
  -6  -1   7   94.69    2.54
  -6   1  -7  101.97    2.75
  -6   1  -7   99.83    2.69
   6   1   7   97.30    2.74
   6  -1  -7   98.14    2.73
  -6  -1   7   99.24    2.51
  -6   1   7   99.81    2.51
   6  -1   7   97.49    2.61
   6  -1   7   99.42    2.71
   6   1  -7   99.54    2.71
   6   1  -7   96.76    2.71
  -6  -1  -7   95.15    2.68
  -6   1   7   97.26    2.51
  -7  -1   7   -0.18    0.20
  -7   1  -7   -0.01    0.22
   7   1   7   -0.24    0.24
  -7  -1   7    0.08    0.20
   7  -1  -7    0.14    0.23
   7  -1  -7    0.22    0.32
   7   1   7    0.04    0.23
   7   1  -7   -0.17    0.19
   7   1  -7    0.26    0.29
   7  -1   7    0.15    0.24
   7  -1   7   -0.17    0.23
  -7  -1  -7    0.06    0.24
  -7   1   7    0.10    0.18
  -7   1   7   -0.21    0.20
   8   1   7  123.24    3.36
   8   1   7  120.58    3.26
  -8  -1   7  125.98    3.19
  -8  -1   7  127.32    3.26
  -8   1  -7  115.09    3.30
   8  -1  -7  127.18    3.59
   8  -1   7  123.15    3.30
  -8   1   7  125.24    3.23
  -8   1   7  121.70    3.12
   8   1  -7  123.52    3.48
  -8  -1  -7  120.85    3.34
   8  -1   7  120.91    3.27
   9  -1  -7    0.16    0.40
   9   1   7   -0.15    0.30
  -9   1  -7   -0.01    0.29
  -9  -1   7    0.04    0.24
   9   1   7    0.15    0.32
  -9   1   7    0.35    0.32
   9   1  -7    0.05    0.35
  -9  -1  -7    0.26    0.31
   9  -1   7    0.63    0.36
  10   1   7  138.34    3.79
  10  -1  -7  150.46    4.28
 -10   1  -7  139.59    3.87
  10   1  -7  141.97    4.11
 -10  -1  -7  134.93    3.83
  10  -1   7  136.41    3.78
 -10   1   7  141.70    3.83
  11   1   7    1.23    0.50
  11  -1  -7    1.02    0.62
 -11   1  -7    0.53    0.40
 -11  -1  -7    0.88    0.43
  11  -1   7    0.57    0.46
  11   1  -7    0.69    0.57
   0  -1   8   -0.04    0.14
   0   1   8    0.02    0.07
   0  -1  -8    0.10    0.11
   0  -1   8   -0.03    0.09
   0  -1  -8   -0.09    0.17
   0   1  -8   -0.38    0.14
   0   1   8    0.03    0.14
   0   1  -8    0.03    0.09
  -1   1  -8  248.25    6.66
   1  -1  -8  268.55    5.77
  -1  -1   8  266.91    5.80
   1  -1  -8  267.89    5.82
   1   1   8  271.39    5.72
  -1  -1   8  269.42    6.16
  -1   1  -8  265.28    5.82
   1   1   8  268.50    6.23
   1   1  -8  266.41    6.68
   1   1  -8  268.03    5.76
   1  -1   8  266.42    6.19
  -1   1   8  264.51    6.15
  -1  -1  -8  260.34    6.69
   1  -1   8  265.92    5.80
  -1  -1  -8  263.33    5.86
  -2   1  -8    3.15    0.28
   2   1   8    3.25    0.22
   2  -1  -8    3.81    0.28
   2   1   8    3.39    0.39
  -2   1  -8    3.31    0.45
  -2  -1   8    3.09    0.32
  -2  -1   8    3.43    0.23
   2  -1  -8    3.54    0.43
  -2  -1  -8    3.32    0.30
  -2   1   8    2.90    0.31
   2  -1   8    3.39    0.38
  -2   1   8    3.14    0.26
   2   1  -8    3.11    0.26
  -2  -1  -8    3.40    0.46
   2   1  -8    2.88    0.40
   2  -1   8    3.69    0.26
  -3   1  -8  156.87    4.18
  -3  -1   8  153.75    3.78
   3   1   8  148.93    3.94
  -3   1  -8  154.70    3.68
   3   1   8  154.67    3.54
  -3  -1   8  160.06    3.52
   3  -1  -8  165.33    3.69
   3  -1  -8  153.39    4.12
   3   1  -8  156.49    3.63
  -3  -1  -8  149.29    4.17
   3   1  -8  154.71    4.14
  -3   1   8  154.24    3.76
  -3   1   8  159.67    3.57
  -3  -1  -8  157.49    3.70
   3  -1   8  159.43    3.60
   3  -1   8  157.98    3.92
  -4   1  -8    3.48    0.45
   4   1   8    3.27    0.32
  -4  -1   8    3.49    0.35
  -4  -1   8    3.18    0.28
   4   1   8    2.64    0.39
  -4   1  -8    3.04    0.37
   4  -1  -8    3.46    0.43
   4  -1  -8    3.33    0.39
   4  -1   8    2.67    0.37
  -4  -1  -8    3.44    0.46
   4  -1   8    3.08    0.33
   4   1  -8    3.44    0.43
  -4   1   8    3.23    0.30
  -4  -1  -8    2.98    0.37
  -4   1   8    2.89    0.31
   4   1  -8    3.83    0.38
   5  -1  -8   95.61    2.52
  -5   1  -8   88.57    2.59
   5   1   8   89.32    2.54
   5   1   8   89.03    2.30
  -5  -1   8   89.28    2.35
  -5   1  -8   86.22    2.41
   5  -1  -8   86.15    2.55
  -5  -1   8   88.61    2.22
  -5   1   8   89.60    2.25
   5   1  -8   88.28    2.40
   5  -1   8   86.03    2.50
  -5   1   8   87.69    2.31
   5   1  -8   88.66    2.56
  -5  -1  -8   92.91    2.63
  -5  -1  -8   87.02    2.44
   5  -1   8   87.96    2.33
   6  -1  -8    0.09    0.22
  -6   1  -8    0.49    0.25
   6   1   8    0.19    0.25
   6  -1  -8    0.45    0.31
   6   1   8    0.17    0.23
  -6  -1   8    0.31    0.20
  -6  -1   8    0.14    0.18
   6  -1   8   -0.16    0.21
  -6   1   8   -0.04    0.16
   6  -1   8   -0.05    0.22
   6   1  -8    0.25    0.25
   6   1  -8   -0.01    0.19
  -6  -1  -8    0.01    0.21
  -6   1   8    0.21    0.20
  -7   1  -8   91.52    2.69
   7   1   8   95.73    2.60
   7   1   8   95.32    2.76
   7  -1  -8   97.66    2.74
   7  -1  -8  100.53    2.91
  -7  -1   8   94.46    2.58
   7   1  -8   97.03    2.80
   7  -1   8   95.07    2.71
   7   1  -8  100.63    2.74
  -7  -1  -8   97.73    2.74
  -7   1   8   96.16    2.54
   7  -1   8   94.08    2.62
  -7   1   8   99.08    2.57
   8   1   8    0.16    0.30
  -8   1  -8    0.22    0.27
   8   1   8    0.64    0.33
  -8  -1   8   -0.04    0.22
   8  -1  -8   -0.07    0.36
  -8   1   8    0.27    0.23
   8  -1   8    0.06    0.30
  -8   1   8    0.01    0.25
   8  -1   8    0.08    0.29
   8   1  -8    0.13    0.34
  -8  -1  -8   -0.01    0.27
   9   1   8   95.57    2.72
   9  -1  -8  101.14    3.15
   9   1   8   97.41    2.82
  -9  -1   8   96.65    2.66
  -9   1  -8   93.74    2.79
   9   1  -8   90.68    2.98
  -9  -1  -8   92.84    2.79
   9  -1   8   93.34    2.73
  -9   1   8   94.20    2.72
  10  -1  -8   -0.27    0.45
 -10   1  -8    0.29    0.37
  10   1   8   -0.03    0.37
  10  -1   8    0.40    0.39
  10   1  -8    0.59    0.50
 -10  -1  -8    0.35    0.34
  11  -1  -8   89.52    3.15
  11   1  -8   87.27    3.07
  11  -1   8   83.18    2.67
   0  -1  -9  157.47    3.60
   0  -1  -9  158.91    4.34
   0   1  -9  156.66    3.54
   0  -1   9  157.04    3.89
   0   1   9  161.77    3.91
   0  -1   9  159.60    3.54
   0   1  -9  156.33    4.33
   1  -1  -9    1.32    0.19
  -1   1  -9    1.30    0.19
  -1   1  -9    1.27    0.34
   1   1   9    1.75    0.30
  -1  -1   9    1.38    0.18
  -1  -1   9    1.23    0.24
   1  -1  -9    1.15    0.31
   1  -1   9    1.38    0.27
   1   1  -9    1.32    0.17
   1  -1   9    1.30    0.17
  -1  -1  -9    1.23    0.20
   1   1  -9    1.65    0.36
  -1   1   9    1.38    0.26
  -1  -1  -9    0.95    0.33
  -2  -1   9  221.21    5.27
   2  -1  -9  225.97    5.76
  -2   1  -9  217.78    5.78
   2   1   9  225.06    5.41
  -2  -1   9  225.85    4.90
  -2   1  -9  223.36    5.01
  -2   1   9  226.81    5.27
   2   1  -9  223.02    5.78
   2  -1   9  227.95    5.38
  -2  -1  -9  222.74    5.04
  -2  -1  -9  211.72    5.78
   2  -1   9  217.25    4.93
   2   1  -9  220.86    4.97
  -2   1   9  225.45    4.96
  -3   1  -9    0.54    0.26
  -3  -1   9    0.53    0.15
   3  -1  -9    0.29    0.23
  -3   1  -9    0.48    0.19
  -3  -1   9    0.32    0.19
   3   1   9    1.01    0.29
   3  -1   9    0.10    0.21
  -3  -1  -9    0.38    0.18
  -3   1   9    0.30    0.17
   3   1  -9    0.26    0.23
  -3  -1  -9    0.62    0.30
   3   1  -9    0.64    0.19
  -3   1   9    0.61    0.17
   3  -1   9    0.41    0.17
  -4   1  -9  201.84    4.83
   4   1   9  202.51    5.13
   4  -1  -9  202.92    5.31
  -4   1  -9  216.11    5.39
  -4  -1   9  204.40    4.93
  -4   1   9  202.75    4.90
   4   1  -9  207.03    4.81
  -4  -1  -9  201.06    4.85
  -4   1   9  210.12    4.68
   4   1  -9  206.17    5.35
   4  -1   9  204.04    4.73
  -4  -1  -9  213.76    5.41
   4  -1   9  204.95    5.09
  -5   1  -9    0.04    0.25
   5  -1  -9    0.11    0.21
  -5  -1   9   -0.04    0.16
   5   1   9    0.38    0.27
  -5   1  -9    0.18    0.21
   5   1  -9    0.26    0.23
   5  -1   9   -0.21    0.22
   5  -1   9    0.28    0.22
  -5  -1  -9    0.12    0.22
  -5  -1  -9    0.07    0.23
  -5   1   9   -0.01    0.17
  -5   1   9   -0.13    0.17
   5   1  -9    0.08    0.23
  -6  -1   9  182.70    4.43
   6  -1  -9  180.31    4.74
  -6   1  -9  184.88    4.48
   6   1   9  181.15    4.64
   6  -1   9  176.82    4.59
  -6   1   9  179.28    4.39
   6   1  -9  177.43    4.71
  -6  -1  -9  176.74    4.49
   6  -1   9  181.44    4.36
   6   1  -9  185.35    4.53
  -6   1   9  182.64    4.28
  -7   1  -9    2.36    0.42
  -7  -1   9    2.31    0.35
   7  -1  -9    2.63    0.44
   7   1   9    2.41    0.46
   7   1  -9    2.43    0.41
  -7  -1  -9    2.71    0.45
   7  -1   9    2.31    0.43
  -7   1   9    2.38    0.38
   7   1  -9    2.13    0.46
   7  -1   9    3.11    0.45
  -7   1   9    1.90    0.33
  -8   1  -9   67.68    2.16
  -8  -1   9   69.81    2.05
   8   1   9   65.67    2.19
  -8  -1  -9   68.55    2.18
   8  -1   9   69.16    2.17
   8  -1   9   70.12    2.09
   8   1  -9   69.09    2.32
   9   1   9    1.09    0.42
  -9   1  -9    1.59    0.45
  -9  -1   9    1.13    0.35
   9   1  -9    2.35    0.59
   9  -1   9    2.00    0.46
  -9  -1  -9    1.31    0.43
 -10   1  -9   45.57    1.79
 -10  -1  -9   48.38    1.83
  10   1  -9   51.87    2.11
   0   1 -10   -0.02    0.23
   0  -1  10    0.20    0.20
   0   1 -10    0.03    0.12
   0  -1 -10    0.24    0.26
   0   1  10    0.00    0.18
   0  -1 -10    0.03    0.14
   1   1  10  136.43    3.51
   1  -1 -10  135.50    3.87
  -1  -1  10  136.38    3.44
   1  -1 -10  136.33    3.14
  -1   1 -10  124.72    3.83
  -1   1 -10  135.93    3.13
   1  -1  10  137.01    3.49
  -1   1  10  134.11    3.44
   1   1 -10  140.98    3.92
  -1  -1 -10  131.48    3.88
  -1  -1 -10  138.62    3.18
   2   1  10    1.39    0.32
  -2  -1  10    1.49    0.27
  -2   1 -10    1.03    0.21
   2  -1 -10    0.42    0.27
  -2   1 -10    1.12    0.37
  -2  -1 -10    0.98    0.36
  -2   1  10    0.98    0.25
  -2   1  10    1.18    0.21
   2  -1  10    1.23    0.31
   2   1 -10    1.90    0.40
  -2  -1 -10    0.99    0.22
  -3   1 -10  134.99    3.26
   3   1  10  131.50    3.58
  -3  -1  10  130.84    3.41
  -3   1 -10  134.41    3.84
   3  -1 -10  132.71    3.79
  -3  -1 -10  138.22    3.90
  -3   1  10  136.42    3.41
  -3  -1 -10  135.71    3.29
   3  -1  10  131.53    3.55
  -3   1  10  140.15    3.18
   3   1 -10  134.98    3.82
   4  -1 -10    0.31    0.25
   4   1  10    0.29    0.27
  -4   1 -10   -0.04    0.19
  -4  -1  10    0.16    0.19
  -4   1 -10   -0.10    0.23
  -4   1  10   -0.03    0.19
   4  -1  10    0.16    0.26
   4   1 -10   -0.06    0.23
  -4  -1 -10   -0.05    0.20
  -4  -1 -10   -0.13    0.26
  -4   1  10   -0.08    0.16
   5   1  10  154.09    4.06
  -5  -1  10  153.58    3.85
  -5   1 -10  147.10    3.80
  -5   1 -10  163.90    4.26
   5  -1 -10  147.41    4.15
   5   1 -10  149.51    4.17
  -5  -1 -10  164.46    4.28
  -5   1  10  151.23    3.82
   5  -1  10  151.67    4.02
  -5  -1 -10  147.31    3.83
   6  -1 -10    1.43    0.36
   6   1  10    1.57    0.41
  -6  -1  10    0.68    0.26
  -6   1 -10    1.40    0.35
   6   1 -10    1.18    0.36
  -6  -1 -10    0.98    0.34
  -6   1  10    1.61    0.32
   6  -1  10    0.80    0.33
  -7   1 -10   71.33    2.22
   7   1  10   72.01    2.32
  -7  -1  10   74.03    2.14
   7  -1 -10   72.85    2.32
   7   1 -10   74.45    2.31
  -7   1  10   76.21    2.13
   7  -1  10   72.62    2.29
  -7  -1 -10   72.18    2.25
   8   1  10    0.54    0.35
  -8   1 -10    0.26    0.32
  -8  -1  10    0.46    0.30
  -8  -1 -10    0.25    0.32
  -9   1 -10   40.99    1.61
  -9  -1  10   42.78    1.50
   9   1  10   41.59    1.64
  -9  -1 -10   40.38    1.61
 -10   1 -10   -0.05    0.33
 -10  -1 -10   -0.31    0.33
   0   1  11   92.74    2.57
   0  -1 -11   95.11    2.99
   0  -1  11   90.89    2.56
   0   1 -11   88.84    2.93
   0  -1 -11   91.97    2.26
   1  -1 -11   10.31    0.81
   1  -1 -11    8.77    0.45
  -1  -1  11    9.19    0.59
  -1   1 -11    8.09    0.82
   1   1  11    9.51    0.64
   1  -1  11   10.01    0.64
  -1   1  11    8.99    0.59
  -1  -1 -11    9.32    0.47
  -1  -1 -11    7.69    0.80
   1   1 -11    9.10    0.84
  -2   1 -11   50.86    1.43
   2   1  11   52.66    1.75
  -2   1 -11   52.97    1.98
   2  -1 -11   53.68    1.96
  -2  -1  11   50.92    1.63
  -2  -1 -11   51.92    1.48
   2   1 -11   53.31    1.98
  -2   1  11   52.29    1.42
  -2  -1 -11   48.55    1.95
   2  -1  11   52.29    1.73
  -2   1  11   53.06    1.65
   3   1  11    0.42    0.31
  -3   1 -11    0.74    0.23
  -3  -1  11    0.69    0.25
   3  -1 -11    0.42    0.30
  -3   1 -11    0.92    0.36
   3  -1  11    0.37    0.26
  -3  -1 -11    0.61    0.23
  -3   1  11    0.49    0.23
   3   1 -11    0.24    0.30
  -3  -1 -11    0.32    0.34
   4  -1 -11   92.80    2.84
  -4  -1  11   91.69    2.53
   4   1  11   86.36    2.67
  -4   1 -11   89.37    2.42
  -4   1 -11   91.20    2.87
   4  -1  11   85.77    2.65
   4   1 -11   90.35    2.84
  -4   1  11   91.14    2.51
  -4  -1 -11   95.70    2.92
  -4  -1 -11   93.02    2.47
  -5  -1  11    0.56    0.26
   5   1  11    0.97    0.35
   5  -1 -11    1.26    0.38
  -5   1 -11    0.76    0.37
  -5   1 -11    0.93    0.30
   5   1 -11    0.47    0.33
   5  -1  11    0.78    0.36
  -5  -1 -11    0.66    0.28
  -5   1  11    1.00    0.29
  -6   1 -11   65.60    1.99
   6   1  11   63.54    2.12
  -6  -1  11   61.54    1.93
   6  -1 -11   63.22    2.14
  -6  -1 -11   63.85    2.00
   6  -1  11   61.85    2.09
   6   1 -11   61.76    2.13
  -6   1  11   65.36    1.93
  -7  -1  11    1.72    0.36
   7   1  11    1.03    0.43
   7  -1 -11    1.36    0.41
  -7   1 -11    1.64    0.40
   7  -1  11    1.19    0.41
  -7   1  11    1.19    0.31
  -7  -1 -11    1.35    0.38
   7   1 -11    2.27    0.45
   8   1  11   42.33    1.69
  -8  -1  11   43.70    1.55
   8  -1 -11   45.31    1.68
  -8   1 -11   44.49    1.64
  -8  -1 -11   41.70    1.62
   9   1  11   -0.26    0.37
  -9   1 -11    0.21    0.34
  -9  -1 -11    0.42    0.35
   0  -1  12    0.17    0.23
   0   1 -12    0.23    0.32
   0   1  12    0.31    0.26
   0  -1 -12    0.23    0.31
  -1  -1  12   76.77    2.26
  -1   1 -12   74.99    2.63
   1  -1 -12   80.34    2.70
   1   1  12   76.33    2.31
  -1  -1 -12   72.96    2.63
   1   1 -12   74.68    2.65
  -1   1  12   74.44    2.24
   1  -1  12   77.28    2.32
  -1  -1 -12   76.24    1.99
  -2   1 -12    1.92    0.47
  -2  -1  12    1.19    0.31
   2   1  12    1.51    0.39
   2  -1 -12    1.94    0.47
   2  -1  12    1.53    0.37
  -2  -1 -12    1.50    0.45
  -2   1  12    1.90    0.37
  -2  -1 -12    1.49    0.28
   2   1 -12    1.31    0.43
   3   1  12   54.36    1.94
  -3   1 -12   60.02    2.17
   3  -1 -12   57.85    2.13
  -3  -1  12   59.68    1.84
  -3  -1 -12   58.20    1.69
   3  -1  12   56.08    1.94
  -3  -1 -12   60.68    2.20
   3   1 -12   56.62    2.15
  -3   1  12   55.14    1.79
   4  -1 -12    0.25    0.33
  -4   1 -12   -0.18    0.30
  -4  -1  12    0.21    0.24
   4   1  12    0.00    0.30
  -4  -1 -12    0.08    0.24
  -4  -1 -12   -0.08    0.30
  -4   1  12   -0.19    0.22
   4   1 -12    0.03    0.29
   4  -1  12   -0.19    0.28
  -5   1 -12   41.42    1.45
   5  -1 -12   44.68    1.73
  -5  -1  12   44.97    1.51
   5   1  12   41.67    1.64
  -5   1 -12   43.49    1.74
   5   1 -12   40.74    1.70
   5  -1  12   39.52    1.62
  -5   1  12   42.18    1.47
  -5  -1 -12   42.90    1.49
  -6  -1  12   -0.09    0.24
   6  -1 -12   -0.43    0.30
  -6   1 -12   -0.22    0.24
   6   1  12   -0.14    0.34
  -6  -1 -12   -0.06    0.29
   6   1 -12    0.11    0.30
   6  -1  12    0.02    0.31
  -6   1  12    0.32    0.27
  -7   1 -12   45.65    1.62
   7   1  12   44.35    1.73
  -7  -1  12   43.75    1.56
   7  -1 -12   42.89    1.72
  -7  -1 -12   43.38    1.63
   7  -1  12   42.81    1.71
   7   1 -12   45.24    1.75
  -7   1  12   45.50    1.55
   8   1  12    1.96    0.52
   8  -1 -12    2.11    0.51
  -8  -1  12    1.94    0.42
  -8   1 -12    2.38    0.47
  -8  -1 -12    3.87    0.56
   0  -1 -13   61.63    2.36
   0   1  13   59.83    1.98
   0  -1  13   60.30    1.99
   0   1 -13   60.50    2.36
  -1  -1  13    1.10    0.35
  -1   1 -13    1.66    0.50
   1   1  13    1.37    0.38
   1  -1 -13    2.04    0.53
  -1   1  13    1.83    0.39
  -1  -1 -13    0.47    0.41
   1  -1  13    1.37    0.37
   1   1 -13    2.34    0.53
   2   1  13   41.19    1.60
   2  -1 -13   42.72    1.82
  -2  -1  13   38.59    1.47
  -2   1 -13   42.82    1.82
   2   1 -13   45.40    1.88
  -2   1  13   37.06    1.44
   2  -1  13   41.04    1.59
  -2  -1 -13   38.71    1.79
   3  -1 -13   -0.03    0.34
  -3   1 -13    0.56    0.38
  -3  -1  13    1.05    0.33
   3   1  13    0.72    0.37
   3   1 -13   -0.36    0.29
  -3  -1 -13   -0.15    0.36
  -3   1  13    0.52    0.29
   3  -1  13    0.25    0.31
  -4   1 -13    9.44    0.92
   4  -1 -13    8.03    0.84
   4   1  13    7.57    0.76
  -4  -1  13    7.42    0.66
  -4  -1 -13   10.40    0.97
   4  -1  13    8.48    0.80
  -4   1  13    8.18    0.62
   4   1 -13    8.53    0.86
  -4  -1 -13    9.12    0.61
  -5  -1  13    0.40    0.30
   5  -1 -13    0.25    0.36
  -5   1 -13    0.37    0.37
   5   1  13   -0.29    0.29
   5  -1  13   -0.12    0.31
  -5  -1 -13   -0.11    0.25
   5   1 -13   -0.12    0.32
  -5   1  13    0.21    0.28
   6  -1 -13   14.06    0.97
   6   1  13   13.77    0.96
  -6  -1  13   13.95    0.82
  -6  -1 -13   12.33    0.80
  -6   1  13   13.52    0.82
   6  -1  13   12.04    0.89
   6   1 -13   14.27    0.95
   7  -1 -13    0.74    0.43
  -7  -1  13    1.22    0.38
   7   1  13   -0.15    0.39
  -7  -1 -13    0.56    0.39
   7  -1  13    1.00    0.46
  -7   1  13    0.81    0.35
   7   1 -13    0.74    0.43
  -8  -1  13   35.60    1.40
   8   1  13   34.25    1.52
   8  -1 -13   34.02    1.52
  -8  -1 -13   32.24    1.43
   0   1 -14   -0.07    0.37
   0  -1  14    0.27    0.29
   0   1  14    0.66    0.35
   0  -1 -14   -0.25    0.39
   1   1  14   13.03    0.90
  -1   1 -14   14.80    1.13
  -1  -1  14   15.86    0.92
   1  -1 -14   15.18    1.15
  -1   1  14   16.52    0.92
   1  -1  14   14.95    0.95
   1   1 -14   15.55    1.13
  -1  -1 -14   15.78    1.16
   2   1  14    0.28    0.38
   2  -1 -14    0.13    0.39
  -2  -1  14    1.12    0.36
  -2   1 -14    1.27    0.51
  -2   1  14    1.01    0.35
  -2  -1 -14    0.43    0.41
   2  -1  14    1.03    0.41
   2   1 -14    1.17    0.48
  -3  -1  14   13.96    0.85
  -3   1 -14   16.52    1.15
   3   1  14   13.91    0.94
   3  -1 -14   14.68    1.07
   3  -1  14   13.89    0.96
   3   1 -14   15.83    1.11
  -3   1  14   14.04    0.84
  -3  -1 -14   15.83    1.14
  -4  -1  14    0.42    0.31
   4   1  14    0.56    0.39
  -4   1 -14   -0.18    0.39
   4  -1 -14    0.28    0.37
   4  -1  14    0.30    0.38
  -4   1  14    0.51    0.31
   4   1 -14    0.13    0.37
  -4  -1 -14    0.39    0.43
  -5  -1  14   13.29    0.86
   5   1  14   14.50    0.99
   5  -1 -14   15.31    1.08
   5  -1  14   15.00    1.02
  -5   1  14   14.78    0.88
   5   1 -14   14.05    1.02
   6  -1 -14    0.76    0.45
  -6  -1  14    0.35    0.35
   6   1  14    0.03    0.42
  -6   1  14    0.44    0.32
   6   1 -14    0.59    0.43
   6  -1  14    0.32    0.43
   7   1  14   10.17    0.94
  -7  -1  14    9.49    0.81
   7  -1 -14    9.38    0.93
   7   1 -14    9.21    0.92
  -7   1  14    9.91    0.82
   7  -1  14   10.60    0.94
   0   1  15    0.76    0.38
   0   1 -15    0.14    0.40
   0  -1  15    1.13    0.41
   0  -1 -15    0.67    0.48
   1  -1 -15    0.02    0.40
  -1  -1  15   -0.11    0.30
   1   1  15    0.05    0.32
  -1   1 -15    0.50    0.47
   1  -1  15    0.12    0.34
  -1   1  15   -0.02    0.32
  -1  -1 -15   -0.35    0.36
   1   1 -15   -0.17    0.37
   2   1  15    4.09    0.61
   2  -1 -15    3.83    0.73
  -2   1 -15    4.03    0.73
  -2  -1  15    3.45    0.54
  -2   1  15    3.73    0.56
  -2  -1 -15    3.62    0.73
   2  -1  15    4.89    0.68
   2   1 -15    4.80    0.81
  -3   1 -15   -0.26    0.41
  -3  -1  15   -0.16    0.31
   3   1  15    0.13    0.36
   3  -1 -15   -0.01    0.42
   3   1 -15   -0.04    0.44
  -3   1  15   -0.08    0.28
   3  -1  15    0.04    0.37
  -3  -1 -15   -0.57    0.37
  -4  -1  15   11.25    0.83
   4   1  15    9.31    0.92
  -4   1 -15   11.52    1.10
   4  -1 -15    9.54    1.00
  -4   1  15   12.01    0.83
  -4  -1 -15   13.44    1.17
   4   1 -15   13.07    1.19
   4  -1  15   10.88    0.98
  -5  -1  15    1.33    0.41
   5  -1 -15    1.22    0.51
   5   1  15    1.03    0.47
   5   1 -15    1.48    0.55
  -5   1  15    0.96    0.38
   5  -1  15    0.84    0.49
   0  -1  16    0.10    0.38
   0   1 -16    0.06    0.43
   0   1  16    0.51    0.39
   0  -1 -16   -0.73    0.36
  -1   1 -16    7.54    0.97
   1  -1 -16    6.57    0.93
  -1  -1  16    7.56    0.79
   1   1  16    6.34    0.75
   1  -1  16    7.61    0.83
  -1  -1 -16    6.35    0.91
   1   1 -16    6.73    0.97
  -1   1  16    5.96    0.73
  -2  -1  16    1.20    0.44
   2   1  16    0.86    0.44
   2  -1 -16    0.97    0.53
  -2   1 -16    0.41    0.50
  -2   1  16    0.84    0.41
   2   1 -16    0.62    0.54
  -2  -1 -16   -0.30    0.40
   2  -1  16    0.56    0.47
  -3   1 -16    1.32    0.55
   3   1  16    0.69    0.44
  -3  -1  16    2.72    0.55
   3  -1 -16    2.36    0.67
   3   1 -16    2.40    0.67
  -3   1  16    2.49    0.52
   3  -1  16    2.44    0.58
  -3  -1 -16    2.20    0.63
  -4   1 -16    0.12    0.45
  -4   1  16   -0.03    0.32
   4  -1  16    0.60    0.47
   0  -2   0  583.78   13.19
   0  -2   0  582.21   13.79
   0  -2   0  623.76   12.91
   0  -2   0  631.50   12.86
   1  -2   0   -0.20    0.08
  -1  -2   0   -0.32    0.06
   1   2   0   -0.04    0.08
  -1  -2   0   -0.07    0.07
  -1   2   0   -0.17    0.07
  -1  -2   0    0.19    0.10
   1  -2   0   -0.11    0.08
  -2   2   0  953.89   20.53
  -2   2   0  967.19   21.05
  -2  -2   0  964.56   20.59
  -2  -2   0  930.13   21.12
   2  -2   0  959.04   22.08
   2   2   0  999.89   22.00
   2  -2   0  979.49   20.68
   2   2   0 1000.00   20.61
  -3   2   0   -0.23    0.09
  -3  -2   0   -0.05    0.13
   3  -2   0   -0.30    0.07
  -3   2   0   -0.29    0.05
   3  -2   0   -0.16    0.12
   3   2   0   -0.06    0.11
  -3  -2   0   -0.28    0.08
  -4  -2   0  145.58    3.45
  -4   2   0  146.10    3.41
   4   2   0  147.10    3.48
  -4  -2   0  143.27    3.52
   4  -2   0  146.66    3.54
  -4   2   0  152.89    3.35
   5  -2   0   -0.03    0.10
   5  -2   0    0.00    0.19
  -5  -2   0   -0.04    0.16
  -5   2   0   -0.10    0.09
  -5  -2   0   -0.16    0.10
  -5   2   0    0.00    0.14
   5   2   0    0.03    0.18
  -6  -2   0  148.26    3.80
  -6   2   0  152.01    3.71
   6   2   0  151.72    3.82
   6  -2   0  153.16    3.72
  -6  -2   0  153.62    3.69
   6  -2   0  149.14    3.91
  -6   2   0  157.54    3.59
   7  -2   0    0.10    0.24
   7   2   0    0.15    0.24
   7  -2   0    0.05    0.15
  -7  -2   0   -0.21    0.14
  -7   2   0   -0.19    0.12
  -7  -2   0    0.22    0.26
  -7   2   0   -0.16    0.19
  -8  -2   0  151.25    3.98
   8   2   0  150.87    4.03
  -8  -2   0  153.04    3.79
  -8   2   0  150.29    3.89
   8  -2   0  148.38    4.05
  -9   2   0    0.03    0.26
  -9  -2   0   -0.34    0.26
  -9  -2   0   -0.14    0.22
   9  -2   0   -0.13    0.30
   9   2   0    0.06    0.31
 -10   2   0  196.83    5.16
 -10  -2   0  197.19    4.97
 -10  -2   0  200.74    5.18
  10  -2   0  195.99    5.25
  10   2   0  198.75    5.32
 -11  -2   0    0.28    0.39
  11   2   0   -0.39    0.42
  11  -2   0   -0.07    0.41
 -11   2   0    0.53    0.41
 -12  -2   0   74.75    2.65
  12   2   0   75.66    2.81
  12  -2   0   74.96    2.70
 -12   2   0   78.98    2.77
   0  -2   1   -0.09    0.05
   0   2  -1   -0.04    0.03
   0  -2  -1   -0.06    0.03
   0  -2   1   -0.02    0.05
   0  -2  -1   -0.03    0.06
   0  -2  -1   -0.13    0.04
   1   2   1  430.40    8.84
  -1   2  -1  427.74    8.82
  -1  -2   1  427.03    8.80
   1  -2  -1  422.95    8.86
  -1   2  -1  423.55    9.55
  -1  -2   1  419.30    8.85
  -1  -2   1  386.77    9.07
   1  -2  -1  388.59    9.51
  -1  -2  -1  408.17    9.14
   1   2  -1  387.96    9.54
   1  -2   1  391.35    9.53
  -1   2   1  425.54    9.03
   1  -2   1  429.79    9.03
  -1  -2  -1  423.45    9.46
  -1  -2  -1  425.56    8.84
  -1   2   1  419.40    8.82
   1  -2   1  417.03    8.87
   2  -2  -1    0.15    0.11
   2  -2  -1    0.29    0.09
  -2  -2   1    0.57    0.13
   2   2   1    0.21    0.10
  -2   2  -1    0.31    0.10
  -2  -2   1    0.09    0.08
  -2   2   1    0.26    0.05
  -2  -2  -1    0.43    0.12
   2   2  -1    0.27    0.10
  -2  -2  -1    0.29    0.11
   2  -2   1    0.41    0.12
   2   2  -1    0.29    0.09
   2  -2   1    0.35    0.08
   2  -2   1    0.19    0.09
  -2  -2  -1    0.31    0.05
  -2   2   1    0.34    0.09
  -3  -2   1  388.86    8.49
   3   2   1  387.59    8.37
  -3   2  -1  387.16    8.31
  -3  -2   1  388.36    8.36
   3  -2  -1  388.09    8.86
   3  -2  -1  376.74    8.49
  -3   2   1  398.18    8.38
   3  -2   1  381.36    8.45
   3   2  -1  389.93    8.78
   3   2  -1  381.87    8.35
  -3  -2  -1  389.07    8.55
  -3  -2  -1  379.23    8.40
   3  -2   1  353.98    8.42
   3  -2   1  374.38    8.86
   4  -2  -1   12.07    0.64
  -4  -2   1   11.35    0.53
  -4   2  -1   11.84    0.51
   4  -2  -1   11.57    0.44
  -4   2  -1   10.89    0.42
   4   2   1   11.00    0.53
  -4  -2   1   11.61    0.46
  -4   2   1   10.88    0.47
  -4  -2  -1   11.90    0.57
   4   2  -1   11.83    0.36
  -4  -2  -1   11.61    0.49
   4  -2   1   11.53    0.45
  -4   2   1   11.40    0.38
   4  -2   1   11.96    0.59
   4   2  -1   12.31    0.55
  -5  -2   1  189.76    4.51
   5   2   1  195.40    4.57
  -5  -2   1  191.62    4.47
   5  -2  -1  192.29    4.59
  -5   2  -1  193.42    4.41
   5  -2  -1  188.07    4.70
  -5   2  -1  197.05    4.49
  -5   2   1  197.18    4.36
   5   2  -1  191.89    4.54
   5  -2   1  195.51    4.64
   5   2  -1  190.22    4.45
  -5  -2  -1  191.17    4.52
  -5   2   1  190.04    4.43
  -5  -2  -1  186.23    4.56
   5  -2   1  194.14    4.60
  -6  -2   1    5.79    0.52
   6   2   1    5.51    0.52
   6  -2  -1    5.93    0.35
   6  -2  -1    6.19    0.61
  -6   2  -1    6.19    0.37
  -6  -2   1    5.07    0.36
  -6   2  -1    7.67    0.49
  -6   2   1    6.07    0.33
  -6   2   1    6.68    0.45
  -6  -2  -1    5.50    0.52
   6  -2   1    6.13    0.36
   6  -2   1    6.13    0.57
  -6  -2  -1    5.73    0.42
   6   2  -1    5.32    0.51
  -7   2  -1  133.68    3.44
   7  -2  -1  134.20    3.33
   7  -2  -1  132.35    3.64
  -7   2  -1  141.06    3.29
   7   2   1  131.40    3.53
  -7  -2   1  130.10    3.46
  -7  -2   1  130.72    3.31
  -7  -2  -1  131.58    3.49
  -7  -2  -1  132.80    3.37
  -7   2   1  139.63    3.22
   7  -2   1  135.21    3.57
  -7   2   1  131.22    3.38
   7   2  -1  130.79    3.51
   8  -2  -1    0.75    0.38
  -8   2  -1    1.23    0.33
  -8  -2   1    0.73    0.24
   8   2   1    1.32    0.39
  -8  -2   1    0.92    0.33
   8   2  -1    1.40    0.39
   8  -2   1    0.86    0.35
  -8   2   1    1.31    0.33
  -8  -2  -1    1.68    0.32
  -8  -2  -1    1.25    0.35
  -9  -2   1  110.68    2.94
  -9  -2   1  106.42    3.17
   9   2   1  110.26    3.27
  -9   2  -1  102.71    3.11
   9  -2  -1  113.04    3.32
  -9  -2  -1  112.71    3.01
   9   2  -1  108.20    3.23
   9  -2   1  117.15    3.28
  -9   2   1  112.66    3.12
  -9  -2  -1  104.51    3.12
 -10  -2   1   -0.50    0.28
 -10  -2   1   -0.18    0.22
 -10   2  -1    0.49    0.36
  10  -2  -1    0.30    0.40
  10   2   1    0.04    0.42
 -10  -2  -1    0.01    0.26
  10  -2   1    0.64    0.42
  10   2  -1   -0.16    0.36
 -10  -2  -1   -0.13    0.29
 -10   2   1   -0.11    0.28
 -11  -2   1   84.35    2.77
  11  -2  -1   86.50    2.86
  11   2   1   83.03    2.88
 -11   2  -1   78.68    2.75
 -11  -2  -1   80.86    2.70
  11   2  -1   81.56    2.87
  11  -2   1   87.90    2.82
 -11   2   1   81.44    2.74
  12   2   1    0.61    0.52
  12  -2  -1    1.36    0.58
 -12  -2   1    0.82    0.51
 -12   2  -1    1.45    0.57
 -12  -2  -1    0.26    0.42
  12   2  -1    1.14    0.59
  12  -2   1    0.85    0.54
 -12   2   1    0.79    0.47
   0  -2  -2  248.72    5.12
   0   2  -2  230.16    5.63
   0   2  -2  230.07    5.06
   0   2   2  232.51    5.31
   0  -2   2  242.05    5.13
   0  -2  -2  242.67    5.05
   0  -2  -2  240.06    5.54
   0  -2   2  240.99    5.27
  -1  -2   2    0.81    0.11
  -1  -2   2    1.02    0.08
   1  -2  -2    0.87    0.11
  -1   2  -2    0.76    0.10
  -1   2  -2    0.97    0.15
   1   2   2    0.78    0.09
   1  -2  -2    0.43    0.10
   1   2   2    1.10    0.16
  -1  -2   2    0.55    0.09
  -1  -2  -2    0.67    0.10
  -1  -2  -2    0.72    0.11
  -1   2   2    0.70    0.09
  -1   2   2    0.65    0.09
   1  -2   2    0.56    0.09
   1   2  -2    0.65    0.14
   1  -2   2    0.57    0.08
  -2   2  -2  147.34    3.31
  -2   2  -2  148.10    3.57
   2  -2  -2  148.29    3.54
   2   2   2  148.97    3.32
  -2  -2   2  145.70    3.36
   2  -2  -2  135.76    3.39
  -2  -2   2  145.91    3.26
   2  -2   2  152.16    3.34
   2  -2   2  151.80    3.35
  -2  -2  -2  150.28    3.46
   2   2  -2  149.63    3.29
   2   2  -2  145.91    3.53
  -2  -2  -2  145.57    3.47
  -2   2   2  145.28    3.26
  -2  -2  -2  154.23    3.35
  -2   2   2  152.43    3.30
  -3   2  -2   -0.07    0.08
  -3   2  -2   -0.04    0.09
  -3  -2   2    0.04    0.09
   3   2   2    0.17    0.12
  -3  -2   2    0.01    0.08
   3  -2  -2   -0.04    0.08
   3  -2  -2    0.24    0.15
   3  -2   2   -0.18    0.09
  -3  -2  -2    0.11    0.13
   3   2  -2    0.08    0.08
   3  -2   2   -0.11    0.08
   3   2  -2    0.24    0.11
  -3   2   2    0.04    0.06
  -3  -2  -2   -0.02    0.05
  -3  -2  -2   -0.14    0.09
  -3   2   2   -0.03    0.08
  -4  -2   2  266.82    5.97
   4  -2  -2  262.74    6.22
  -4  -2   2  259.36    5.88
   4   2   2  261.29    5.98
   4  -2  -2  258.18    6.12
  -4   2  -2  262.92    5.93
  -4   2  -2  266.50    6.23
   4   2  -2  270.80    6.16
   4  -2   2  261.48    6.02
   4   2  -2  266.69    5.95
  -4   2   2  264.39    5.85
  -4   2   2  266.99    5.86
  -4  -2  -2  261.55    6.01
   4  -2   2  265.09    5.97
  -4  -2  -2  267.48    6.08
   5  -2  -2    0.29    0.13
  -5   2  -2    0.28    0.13
  -5  -2   2    0.33    0.17
  -5  -2   2    0.12    0.11
  -5   2  -2    0.46    0.19
   5  -2  -2    0.02    0.20
   5   2   2    0.19    0.19
   5  -2   2    0.15    0.13
   5   2  -2    0.22    0.10
  -5   2   2    0.16    0.14
  -5   2   2    0.42    0.11
  -5  -2  -2    0.50    0.20
   5   2  -2    0.15    0.17
  -5  -2  -2    0.25    0.15
   5  -2   2    0.17    0.18
  -6  -2   2  173.39    4.20
  -6  -2   2  171.68    4.13
   6  -2  -2  173.20    4.45
  -6   2  -2  174.94    4.22
   6  -2  -2  172.02    4.22
   6   2   2  170.02    4.28
  -6   2  -2  177.90    4.24
  -6  -2  -2  174.49    4.28
   6  -2   2  179.76    4.33
   6  -2   2  174.11    4.13
  -6   2   2  176.18    4.02
   6   2  -2  169.88    4.26
  -6  -2  -2  175.87    4.24
   6   2  -2  173.46    4.10
  -6   2   2  174.10    4.13
   7   2   2   11.23    0.75
   7  -2  -2   12.24    0.55
  -7  -2   2   11.06    0.57
  -7  -2   2   11.64    0.70
   7  -2  -2   11.48    0.83
  -7   2  -2   12.14    0.72
  -7  -2  -2   12.11    0.66
  -7  -2  -2   13.16    0.75
  -7   2   2   12.92    0.69
   7  -2   2   13.21    0.77
   7   2  -2   12.76    0.76
   7  -2   2   13.28    0.62
  -7   2   2   12.70    0.53
  -8  -2   2  111.24    3.11
  -8   2  -2  111.61    3.13
   8   2   2  112.56    3.23
  -8  -2   2  113.72    2.94
   8  -2  -2  112.69    3.32
   8  -2   2  115.78    3.19
   8   2  -2  106.93    3.16
  -8  -2  -2  114.75    3.14
  -8   2   2  116.64    3.06
  -8  -2  -2  113.27    3.03
   9   2   2    0.13    0.37
   9  -2  -2    0.75    0.42
  -9  -2   2    0.23    0.22
  -9  -2   2   -0.04    0.27
  -9   2  -2    0.18    0.31
   9   2  -2   -0.61    0.28
  -9   2   2   -0.34    0.22
  -9  -2  -2    0.15    0.24
  -9  -2  -2   -0.08    0.25
   9  -2   2   -0.34    0.26
  10  -2  -2   64.14    2.32
 -10   2  -2   63.55    2.22
 -10  -2   2   59.27    2.18
 -10  -2   2   59.72    1.91
  10   2   2   61.81    2.26
  10   2  -2   61.10    2.27
 -10  -2  -2   62.16    2.14
  10  -2   2   60.80    2.18
 -10  -2  -2   60.83    2.02
 -10   2   2   60.98    2.11
  11  -2  -2    0.27    0.47
 -11  -2   2    0.85    0.44
 -11   2  -2    0.59    0.46
  11   2   2    0.65    0.46
 -11  -2  -2    1.00    0.45
  11   2  -2    0.99    0.51
 -11   2   2    0.61    0.41
  11  -2   2    0.50    0.46
  12  -2  -2   57.61    2.33
 -12  -2   2   57.34    2.22
 -12   2  -2   52.53    2.21
  12   2   2   55.80    2.25
 -12  -2  -2   57.69    2.19
 -12   2   2   56.74    2.23
  12  -2   2   54.94    2.18
  12   2  -2   58.75    2.39
   0   2  -3   -0.02    0.03
   0   2  -3    0.22    0.12
   0  -2   3   -0.08    0.05
   0   2   3   -0.07    0.07
   0  -2   3   -0.04    0.06
   0  -2  -3    0.53    0.12
   0  -2  -3   -0.09    0.05
   1  -2  -3  206.22    4.73
   1  -2  -3  218.02    4.71
   1  -2  -3  214.03    5.16
  -1   2  -3  221.31    4.76
  -1   2  -3  220.74    5.25
   1   2   3  212.87    4.70
   1   2   3  211.99    4.98
  -1  -2   3  221.05    4.73
  -1  -2   3  221.41    4.63
  -1   2   3  219.69    4.72
   1  -2   3  222.29    4.74
   1  -2   3  217.34    4.86
  -1  -2  -3  216.05    5.15
  -1  -2  -3  228.12    4.75
  -1   2   3  221.70    4.87
   1   2  -3  216.42    5.22
   2   2   3    1.45    0.21
  -2   2  -3    1.80    0.22
   2   2   3    1.59    0.17
   2  -2  -3    1.81    0.19
  -2  -2   3    1.92    0.13
  -2  -2   3    2.00    0.17
   2  -2  -3    1.70    0.21
  -2   2  -3    1.53    0.18
  -2   2   3    2.03    0.14
  -2  -2  -3    1.85    0.19
  -2  -2  -3    1.71    0.18
   2  -2   3    1.74    0.18
  -2   2   3    1.65    0.15
   2   2  -3    1.79    0.20
   2  -2   3    1.90    0.17
   2   2  -3    1.86    0.16
  -3  -2   3  196.54    4.42
  -3   2  -3  200.43    4.55
  -3  -2   3  203.97    4.57
   3  -2  -3  201.87    4.80
   3  -2  -3  199.63    4.65
  -3   2  -3  202.41    4.85
   3   2   3  199.47    4.73
   3   2   3  201.78    4.54
   3  -2   3  204.75    4.57
   3  -2   3  201.84    4.58
  -3   2   3  199.29    4.43
  -3  -2  -3  194.23    4.74
   3   2  -3  197.28    4.78
  -3   2   3  204.42    4.49
   3   2  -3  199.95    4.49
  -3  -2  -3  201.65    4.57
   4  -2  -3    1.14    0.26
  -4  -2   3    1.18    0.17
   4  -2  -3    1.13    0.18
  -4  -2   3    1.01    0.18
  -4   2  -3    1.61    0.25
   4   2   3    1.25    0.23
   4   2   3    1.41    0.23
  -4   2  -3    0.99    0.18
   4  -2   3    1.02    0.18
   4  -2   3    0.59    0.18
  -4   2   3    0.87    0.12
  -4  -2  -3    1.23    0.23
  -4   2   3    1.53    0.19
   4   2  -3    1.08    0.16
  -4  -2  -3    1.32    0.16
   4   2  -3    1.01    0.19
   5   2   3  253.86    5.81
   5  -2  -3  249.16    5.95
  -5  -2   3  244.23    5.65
   5  -2  -3  250.83    5.95
  -5  -2   3  252.16    5.72
  -5   2  -3  251.01    5.76
  -5   2  -3  249.51    5.97
   5   2   3  250.58    5.88
   5  -2   3  253.36    5.75
   5   2  -3  254.65    5.88
  -5   2   3  251.19    5.61
   5  -2   3  250.73    5.80
  -5  -2  -3  251.05    5.80
   5   2  -3  250.71    5.75
  -5   2   3  255.19    5.62
  -5  -2  -3  245.77    5.87
  -5  -2  -3  231.47    5.80
  -6  -2   3    1.28    0.27
   6   2   3    1.21    0.30
  -6  -2   3    1.11    0.21
  -6   2  -3    0.96    0.21
   6  -2  -3    1.14    0.21
   6  -2  -3    1.14    0.34
  -6   2  -3    0.77    0.26
   6   2   3    1.36    0.28
   6   2  -3    1.17    0.17
  -6  -2  -3    1.25    0.28
   6   2  -3    1.35    0.29
  -6  -2  -3    1.06    0.25
   6  -2   3    1.10    0.23
   6  -2   3    1.36    0.31
  -6   2   3    1.61    0.20
  -6   2   3    1.51    0.27
   7   2   3  163.46    4.08
  -7  -2   3  159.91    4.01
  -7  -2   3  160.44    3.93
  -7   2  -3  160.66    4.10
   7  -2  -3  159.46    4.00
   7   2   3  159.52    4.16
   7  -2  -3  160.18    4.31
  -7  -2  -3  159.64    4.08
  -7   2   3  160.83    3.81
   7  -2   3  161.96    4.12
  -7   2   3  163.43    3.96
   7   2  -3  161.95    4.13
  -7  -2  -3  168.12    4.10
   7  -2   3  163.55    3.94
  -8   2  -3   -0.02    0.26
   8  -2  -3   -0.11    0.31
   8   2   3   -0.41    0.20
  -8  -2   3    0.04    0.24
  -8  -2   3   -0.17    0.18
   8   2   3   -0.25    0.27
  -8   2   3   -0.05    0.22
  -8  -2  -3   -0.25    0.21
   8  -2   3   -0.19    0.25
   8   2  -3   -0.03    0.26
   9   2   3   76.20    2.29
   9  -2  -3   75.40    2.59
  -9  -2   3   74.59    2.37
   9   2   3   73.83    2.46
  -9   2  -3   75.53    2.45
  -9  -2   3   77.35    2.18
   9  -2   3   77.83    2.42
   9   2  -3   71.47    2.44
  -9   2   3   75.46    2.30
  -9  -2  -3   69.11    2.31
  10   2   3    2.23    0.55
 -10  -2   3    2.14    0.40
 -10   2  -3    1.38    0.44
 -10  -2   3    1.89    0.49
  10   2   3    2.51    0.50
  10  -2  -3    2.94    0.64
 -10   2   3    1.95    0.48
  10  -2   3    3.13    0.55
 -10  -2  -3    2.74    0.53
  10   2  -3    2.17    0.57
  11   2   3   38.78    1.74
  11  -2  -3   38.43    1.83
 -11   2  -3   43.19    1.81
 -11  -2   3   40.49    1.78
 -11   2   3   39.53    1.67
  11   2  -3   36.84    1.79
 -11  -2  -3   38.72    1.68
  11  -2   3   44.23    1.78
  12   2   3    0.10    0.50
 -12  -2   3    0.45    0.47
  12  -2  -3    0.10    0.50
 -12   2  -3    0.43    0.45
  12   2  -3    0.02    0.55
 -12  -2  -3    0.19    0.40
 -12   2   3    0.05    0.43
  12  -2   3    0.47    0.49
   0  -2   4  213.85    4.98
   0   2  -4  228.42    4.72
   0   2   4  220.26    5.03
   0  -2  -4  219.36    5.31
   0  -2   4  221.39    4.80
   0  -2  -4  225.07    4.81
   1   2   4   57.61    1.28
  -1   2  -4   58.71    1.36
  -1   2  -4   55.88    1.64
   1  -2  -4   55.42    1.34
   1  -2  -4   58.15    1.35
   1   2   4   55.95    1.52
   1  -2  -4   54.51    1.57
  -1  -2   4   57.40    1.25
  -1  -2   4   58.55    1.35
   1  -2   4   56.22    1.42
  -1  -2  -4   55.86    1.58
  -1   2   4   58.28    1.42
  -1  -2  -4   58.39    1.38
   1  -2   4   57.19    1.35
   2   2   4   98.37    2.27
  -2   2  -4   99.93    2.33
   2  -2  -4   94.94    2.50
  -2  -2   4   98.85    2.34
   2   2   4   93.67    2.46
  -2   2  -4   98.66    2.58
   2  -2  -4   97.20    2.33
  -2  -2   4   99.53    2.16
   2   2  -4   95.95    2.24
  -2   2   4   98.10    2.29
   2  -2   4  100.41    2.27
   2   2  -4   97.84    2.53
  -2  -2  -4   96.91    2.30
  -2  -2  -4   92.15    2.49
  -2   2   4   97.72    2.23
   2  -2   4   98.96    2.34
   3  -2  -4   41.52    1.22
  -3  -2   4   41.18    1.04
  -3  -2   4   41.50    1.12
   3   2   4   41.17    1.27
   3   2   4   41.10    1.17
  -3   2  -4   39.91    1.20
  -3   2  -4   41.32    1.28
   3  -2  -4   41.15    1.24
  -3  -2  -4   39.87    1.19
   3   2  -4   39.73    1.11
  -3  -2  -4   38.46    1.20
  -3   2   4   40.18    1.07
   3  -2   4   43.33    1.17
   3   2  -4   40.54    1.21
  -3   2   4   41.10    1.07
   3  -2   4   42.45    1.17
  -4  -2   4  163.35    3.72
   4  -2  -4  159.23    3.92
  -4   2  -4  160.10    3.98
   4   2   4  160.84    3.92
   4   2   4  161.24    3.77
  -4  -2   4  160.62    3.62
   4  -2  -4  155.02    3.87
  -4   2  -4  157.63    3.80
  -4   2   4  159.82    3.62
   4  -2   4  154.61    3.76
   4   2  -4  165.30    3.91
  -4   2   4  164.95    3.64
   4  -2   4  155.98    3.76
   4   2  -4  158.80    3.71
  -4  -2  -4  141.66    3.85
  -4  -2  -4  154.66    3.79
  -5   2  -4    0.13    0.17
  -5  -2   4   -0.14    0.13
   5  -2  -4   -0.02    0.20
  -5   2  -4   -0.01    0.15
   5   2   4   -0.30    0.16
  -5  -2   4   -0.02    0.11
   5  -2  -4    0.12    0.14
   5   2   4   -0.06    0.15
  -5   2   4    0.09    0.13
   5  -2   4    0.05    0.15
   5  -2   4    0.20    0.20
  -5  -2  -4   -0.09    0.12
   5   2  -4    0.06    0.13
  -5   2   4    0.03    0.10
   5   2  -4    0.23    0.19
  -5  -2  -4    0.07    0.17
  -6   2  -4  101.32    2.75
  -6  -2   4  100.72    2.56
   6   2   4   99.06    2.75
  -6  -2   4   99.81    2.60
   6  -2  -4  101.88    2.65
  -6   2  -4  102.64    2.69
   6  -2  -4   98.19    2.87
   6   2   4  102.16    2.75
   6  -2   4  105.82    2.62
  -6   2   4  100.62    2.45
   6   2  -4   98.09    2.69
  -6   2   4   99.90    2.55
   6  -2   4   98.71    2.70
   6   2  -4  103.63    2.58
  -7  -2   4    7.17    0.47
   7  -2  -4    6.05    0.70
   7  -2  -4    6.81    0.45
  -7  -2   4    8.18    0.57
   7   2   4    6.91    0.61
   7   2   4    6.26    0.62
  -7   2  -4    7.71    0.67
  -7  -2  -4    7.49    0.65
   7  -2   4    8.48    0.53
   7  -2   4    5.47    0.55
   7   2  -4    6.44    0.63
  -7   2   4    7.22    0.41
  -7   2   4    7.38    0.51
  -8  -2   4   87.58    2.41
   8   2   4   89.43    2.60
  -8   2  -4   89.55    2.66
   8  -2  -4   90.48    2.86
  -8  -2   4   85.41    2.53
   8   2   4   94.30    2.69
   8  -2   4   89.81    2.60
  -8   2   4   91.74    2.51
  -8  -2  -4   83.05    2.56
   9  -2  -4    6.38    0.83
  -9  -2   4    4.59    0.59
   9   2   4    6.63    0.67
  -9  -2   4    5.85    0.54
   9   2   4    6.34    0.71
  -9   2  -4    5.48    0.67
  -9  -2  -4    5.88    0.64
  -9   2   4    5.04    0.60
   9  -2   4    5.90    0.67
   9   2  -4    4.90    0.66
  10   2   4   29.68    1.38
  10  -2  -4   25.15    1.41
  10   2   4   27.58    1.27
 -10   2  -4   23.91    1.29
 -10  -2   4   24.40    1.08
 -10  -2   4   26.40    1.31
  10  -2   4   27.18    1.30
 -10   2   4   24.87    1.23
 -10  -2  -4   27.09    1.27
  10   2  -4   26.24    1.38
 -11   2  -4    5.53    0.74
 -11  -2   4    5.48    0.74
  11  -2  -4    4.81    0.81
  11   2   4    5.58    0.77
  11   2  -4    5.45    0.81
  11  -2   4    5.85    0.76
 -11  -2  -4    5.30    0.70
 -11   2   4    5.50    0.70
 -12  -2   4   31.46    1.62
  12   2   4   29.26    1.54
  12  -2  -4   32.25    1.69
 -12   2   4   31.17    1.56
  12  -2   4   31.02    1.54
   0  -2   5   -0.01    0.07
   0  -2  -5   -0.01    0.07
   0   2  -5    0.13    0.14
   0  -2  -5    0.12    0.12
   0   2  -5   -0.04    0.05
   0  -2   5    0.10    0.09
   0   2   5   -0.04    0.08
   1  -2  -5  152.31    3.41
   1  -2  -5  151.70    3.88
  -1  -2   5  159.51    3.44
  -1   2  -5  161.26    3.43
   1   2   5  155.85    3.70
  -1   2  -5  146.30    3.93
  -1  -2   5  155.88    3.33
   1   2   5  154.23    3.33
  -1  -2   5  151.85    3.60
   1  -2  -5  156.32    3.43
   1  -2   5  156.33    3.44
   1  -2   5  151.88    3.60
  -1   2   5  155.90    3.59
  -1  -2  -5  150.21    3.89
   1   2  -5  157.68    3.94
  -1  -2  -5  159.59    3.48
  -2   2  -5   23.78    0.75
  -2  -2   5   24.13    0.76
  -2  -2   5   25.15    0.62
  -2   2  -5   26.89    0.96
   2  -2  -5   23.70    0.86
   2  -2  -5   24.70    0.77
   2   2   5   23.70    0.68
   2   2   5   22.70    0.85
   2  -2   5   24.21    0.71
   2  -2   5   24.19    0.78
  -2  -2  -5   22.68    0.87
   2   2  -5   24.23    0.89
  -2   2   5   23.52    0.73
  -2   2   5   23.72    0.69
  -2  -2  -5   24.22    0.75
   2   2  -5   24.32    0.70
  -3   2  -5   84.13    2.11
   3   2   5   80.85    2.23
   3  -2  -5   80.70    2.13
  -3  -2   5   83.86    2.07
  -3   2  -5   83.93    2.30
   3  -2  -5   81.42    2.23
  -3  -2   5   83.67    1.92
   3   2   5   86.08    2.04
  -3   2   5   80.27    1.97
  -3  -2  -5   86.17    2.11
   3  -2   5   84.28    2.05
  -3   2   5   85.44    2.03
   3   2  -5   81.74    2.01
  -3  -2  -5   76.45    2.23
   3   2  -5   81.53    2.24
   3  -2   5   81.86    2.12
  -4   2  -5    3.08    0.35
   4  -2  -5    3.86    0.41
  -4  -2   5    4.03    0.30
  -4  -2   5    3.40    0.28
   4  -2  -5    3.92    0.37
   4   2   5    4.44    0.44
   4   2   5    3.61    0.35
  -4   2  -5    3.33    0.36
  -4  -2  -5    3.29    0.35
   4  -2   5    3.12    0.32
   4   2  -5    3.41    0.32
   4  -2   5    3.49    0.35
  -4  -2  -5    2.78    0.33
  -4   2   5    3.87    0.26
  -4   2   5    4.18    0.28
   4   2  -5    4.07    0.37
   5  -2  -5   40.06    1.41
  -5  -2   5   38.76    1.17
   5  -2  -5   40.21    1.27
   5   2   5   42.96    1.37
  -5   2  -5   39.32    1.31
   5   2   5   39.37    1.27
  -5   2  -5   38.57    1.29
  -5  -2   5   39.29    1.17
   5   2  -5   38.56    1.23
  -5   2   5   39.40    1.16
   5   2  -5   39.91    1.27
  -5  -2  -5   41.57    1.34
   5  -2   5   40.28    1.25
  -5   2   5   40.96    1.11
  -5  -2  -5   33.26    1.19
   5  -2   5   41.92    1.30
   6  -2  -5    1.45    0.26
   6  -2  -5    0.80    0.30
   6   2   5    1.18    0.29
  -6  -2   5    1.30    0.27
  -6  -2   5    1.25    0.23
  -6   2  -5    0.87    0.27
  -6   2  -5    0.77    0.24
   6   2   5    0.82    0.28
   6  -2   5    1.12    0.30
  -6  -2  -5    0.81    0.27
   6   2  -5    1.14    0.29
  -6   2   5    0.73    0.17
   6   2  -5    1.20    0.23
   6  -2   5    1.50    0.28
  -6   2   5    1.23    0.25
  -7   2  -5   34.74    1.33
   7  -2  -5   34.53    1.17
  -7  -2   5   37.01    1.26
   7   2   5   35.51    1.33
  -7  -2   5   34.43    1.15
   7  -2  -5   32.94    1.46
   7   2   5   33.85    1.30
  -7   2   5   34.27    1.20
   7  -2   5   36.14    1.31
  -7   2   5   33.97    1.07
  -7  -2  -5   34.56    1.32
   7  -2   5   35.34    1.21
   7   2  -5   35.17    1.34
   8   2   5   10.39    0.72
   8  -2  -5   11.14    0.98
  -8  -2   5   10.80    0.71
  -8  -2   5   10.91    0.62
   8   2   5   10.30    0.74
  -8   2  -5    9.92    0.72
   8  -2   5   11.16    0.75
  -8   2   5   10.36    0.66
   8   2  -5   11.67    0.80
  -8  -2  -5   10.42    0.74
   9   2   5   37.72    1.53
   9  -2  -5   37.36    1.74
  -9  -2   5   35.82    1.48
  -9  -2   5   38.98    1.37
   9   2   5   42.76    1.55
  -9   2  -5   36.33    1.54
  -9  -2  -5   38.78    1.52
   9   2  -5   38.64    1.62
  -9   2   5   41.66    1.49
   9  -2   5   40.42    1.54
  10  -2  -5   -0.44    0.45
 -10  -2   5   -0.28    0.23
  10   2   5   -0.15    0.33
 -10   2  -5   -0.57    0.28
  10   2   5    0.18    0.38
 -10  -2   5   -0.30    0.29
 -10   2   5   -0.07    0.32
 -10  -2  -5   -0.06    0.32
  10  -2   5   -0.49    0.30
  10   2  -5   -0.16    0.39
  11  -2  -5   27.55    1.53
  11   2   5   26.82    1.37
 -11   2  -5   28.08    1.39
  11  -2   5   25.43    1.34
 -11  -2  -5   25.76    1.31
 -11   2   5   28.08    1.36
  11   2  -5   27.28    1.50
   0  -2   6   21.58    0.73
   0   2  -6   21.84    0.57
   0  -2  -6   21.46    0.89
   0   2   6   22.61    0.77
   0   2  -6   22.81    0.93
   0  -2  -6   22.23    0.66
   0  -2   6   22.17    0.63
  -1  -2   6    0.39    0.08
  -1  -2   6    0.45    0.11
  -1   2  -6    0.21    0.18
   1   2   6    0.36    0.06
  -1  -2   6    0.40    0.13
   1  -2  -6    0.33    0.10
   1  -2  -6    0.16    0.16
   1  -2  -6    0.27    0.10
  -1   2  -6    0.43    0.10
   1   2   6    0.49    0.17
  -1  -2  -6    0.53    0.13
   1   2  -6    0.28    0.18
  -1  -2  -6    0.53    0.20
   1  -2   6    0.45    0.15
   1  -2   6    0.51    0.12
  -1   2   6    0.48    0.14
   2  -2  -6   87.35    2.16
  -2  -2   6   93.03    2.01
  -2  -2   6   91.14    2.25
   2  -2  -6   87.43    2.46
  -2   2  -6   89.93    2.53
  -2   2  -6   88.94    2.16
   2   2   6   89.55    2.04
   2   2   6   88.45    2.37
  -2  -2  -6   86.59    2.50
  -2  -2  -6   89.64    2.17
   2  -2   6   88.79    2.12
   2   2  -6   89.25    2.49
   2   2  -6   90.21    2.12
  -2   2   6   93.01    2.23
  -2   2   6   90.24    2.11
   2  -2   6   88.32    2.27
  -3  -2   6    4.76    0.34
   3   2   6    4.51    0.43
  -3   2  -6    5.70    0.44
   3   2   6    5.13    0.32
  -3   2  -6    4.86    0.36
   3  -2  -6    5.16    0.40
  -3  -2   6    5.47    0.27
   3  -2  -6    5.29    0.43
  -3   2   6    5.61    0.31
  -3  -2  -6    4.88    0.47
   3  -2   6    5.25    0.37
   3  -2   6    5.12    0.33
  -3  -2  -6    5.07    0.35
   3   2  -6    5.55    0.43
  -3   2   6    5.36    0.32
   3   2  -6    5.40    0.33
  -4  -2   6   24.46    0.74
   4  -2  -6   22.75    0.90
  -4  -2   6   22.55    0.80
  -4   2  -6   23.13    0.88
   4   2   6   24.07    0.96
  -4   2  -6   24.17    0.94
   4   2   6   24.58    0.82
   4  -2  -6   22.39    0.93
  -4  -2  -6   20.63    0.90
   4  -2   6   24.17    0.85
  -4   2   6   22.24    0.75
   4   2  -6   22.88    0.90
  -4  -2  -6   23.32    0.89
   4  -2   6   22.77    0.87
  -4   2   6   22.98    0.76
   4   2  -6   23.91    0.83
  -5   2  -6    2.80    0.37
   5   2   6    2.11    0.34
   5   2   6    2.85    0.35
  -5  -2   6    2.87    0.30
   5  -2  -6    2.38    0.31
  -5  -2   6    2.50    0.29
   5  -2  -6    2.81    0.42
  -5   2  -6    2.08    0.32
  -5   2   6    2.21    0.27
   5  -2   6    2.96    0.37
  -5   2   6    2.69    0.27
  -5  -2  -6    3.04    0.39
   5  -2   6    1.72    0.29
   5   2  -6    2.97    0.35
   5   2  -6    2.53    0.33
  -5  -2  -6    2.46    0.34
  -6   2  -6   26.22    1.01
   6   2   6   25.48    1.07
  -6  -2   6   25.63    0.93
   6   2   6   25.93    1.01
  -6   2  -6   25.13    1.05
   6  -2  -6   26.37    1.00
  -6  -2   6   27.31    0.96
   6  -2  -6   26.68    1.19
  -6   2   6   25.33    0.86
  -6  -2  -6   25.94    1.06
   6   2  -6   26.33    0.96
   6  -2   6   24.83    0.99
   6  -2   6   26.69    1.03
   6   2  -6   26.78    1.05
  -6   2   6   25.30    0.92
   7   2   6    3.93    0.50
   7   2   6    4.30    0.50
  -7  -2   6    3.84    0.44
  -7  -2   6    3.64    0.38
   7  -2  -6    3.13    0.56
  -7   2  -6    4.32    0.51
   7  -2  -6    3.31    0.40
   7  -2   6    3.24    0.45
  -7   2   6    3.84    0.43
   7  -2   6    4.41    0.47
  -7  -2  -6    3.30    0.46
  -7   2   6    3.73    0.35
   7   2  -6    4.04    0.51
   8   2   6    7.65    0.69
   8  -2  -6    8.47    0.89
  -8  -2   6    7.19    0.54
   8   2   6    7.43    0.67
  -8  -2   6    8.02    0.68
  -8   2  -6    7.32    0.68
   8  -2   6    6.70    0.64
   8   2  -6    7.17    0.72
  -8  -2  -6    8.13    0.71
  -8   2   6    6.96    0.61
   9  -2  -6    1.44    0.53
   9   2   6    1.19    0.42
  -9  -2   6    1.20    0.32
   9   2   6    1.56    0.41
  -9   2  -6    1.97    0.43
   9   2  -6    0.89    0.41
  -9   2   6    1.62    0.41
   9  -2   6    1.49    0.41
  -9  -2  -6    2.22    0.44
  10   2   6   21.25    1.14
 -10   2  -6   22.17    1.19
  10  -2  -6   23.05    1.38
  10   2   6   22.68    1.14
  10  -2   6   21.38    1.12
 -10  -2  -6   21.05    1.14
  10   2  -6   22.28    1.31
 -10   2   6   20.04    1.11
  11  -2  -6    0.78    0.57
 -11   2  -6    0.78    0.43
  11   2   6    1.71    0.55
 -11   2   6    1.02    0.46
  11  -2   6    1.83    0.52
  11   2  -6    1.88    0.60
 -11  -2  -6    1.01    0.41
   0  -2  -7    0.01    0.05
   0   2  -7    0.14    0.20
   0   2   7    0.28    0.15
   0  -2   7   -0.04    0.09
   0   2  -7    0.02    0.08
   0  -2  -7   -0.04    0.10
   0  -2   7   -0.27    0.11
   0  -2  -7    0.25    0.19
   1  -2  -7    3.39    0.40
  -1  -2   7    2.50    0.27
   1  -2  -7    3.65    0.21
   1   2   7    2.86    0.32
  -1   2  -7    3.19    0.21
  -1   2  -7    2.64    0.39
   1  -2  -7    2.74    0.23
  -1  -2   7    2.81    0.22
   1   2   7    2.96    0.14
  -1  -2   7    3.21    0.18
  -1  -2  -7    3.34    0.41
  -1   2   7    2.45    0.27
  -1  -2  -7    2.85    0.25
   1   2  -7    3.57    0.44
   1  -2   7    3.24    0.22
   1  -2   7    2.63    0.29
   2  -2  -7   23.61    0.97
  -2   2  -7   25.41    0.78
  -2  -2   7   25.60    0.85
   2  -2  -7   23.88    0.78
  -2   2  -7   23.95    1.04
  -2  -2   7   23.90    0.65
   2   2   7   23.82    0.93
   2   2   7   24.02    0.65
   2  -2   7   24.88    0.88
   2   2  -7   24.36    1.01
   2   2  -7   23.92    0.74
   2  -2   7   24.19    0.74
  -2   2   7   25.13    0.75
  -2   2   7   24.51    0.83
  -2  -2  -7   24.94    0.80
  -2  -2  -7   25.11    1.04
   3   2   7    5.55    0.31
   3  -2  -7    6.23    0.43
   3  -2  -7    6.46    0.47
  -3  -2   7    6.51    0.30
  -3   2  -7    6.52    0.52
  -3   2  -7    5.10    0.36
   3   2   7    4.99    0.47
  -3  -2   7    6.12    0.38
  -3  -2  -7    6.51    0.52
   3   2  -7    5.66    0.36
  -3  -2  -7    5.61    0.38
   3  -2   7    5.19    0.34
   3   2  -7    5.73    0.52
  -3   2   7    4.33    0.31
   3  -2   7    5.61    0.43
  -3   2   7    5.65    0.36
   4   2   7    0.69    0.20
   4   2   7    0.75    0.25
   4  -2  -7    0.76    0.23
  -4   2  -7    0.97    0.25
  -4  -2   7    1.23    0.19
   4  -2  -7    0.62    0.25
  -4   2  -7    0.80    0.23
  -4  -2   7    0.92    0.21
   4  -2   7    0.30    0.19
  -4   2   7    0.70    0.18
  -4  -2  -7    0.87    0.26
  -4  -2  -7    1.16    0.24
  -4   2   7    0.85    0.19
   4  -2   7    0.90    0.22
   4   2  -7    0.82    0.23
   4   2  -7    0.80    0.21
   5   2   7    2.31    0.31
  -5   2  -7    1.89    0.33
  -5  -2   7    2.83    0.29
   5   2   7    1.99    0.36
  -5  -2   7    1.71    0.26
   5  -2  -7    2.39    0.41
   5  -2  -7    1.82    0.32
  -5   2  -7    1.87    0.33
  -5  -2  -7    1.90    0.34
   5  -2   7    1.54    0.31
   5   2  -7    1.68    0.31
  -5  -2  -7    1.71    0.33
   5  -2   7    1.87    0.31
  -5   2   7    2.05    0.26
  -5   2   7    2.11    0.28
   5   2  -7    2.32    0.34
  -6   2  -7    1.70    0.33
  -6   2  -7    1.73    0.35
   6   2   7    1.47    0.35
  -6  -2   7    1.30    0.26
  -6  -2   7    1.83    0.29
   6  -2  -7    1.25    0.30
   6   2   7    1.77    0.33
   6  -2  -7    2.80    0.48
  -6   2   7    2.08    0.27
  -6  -2  -7    1.51    0.34
   6   2  -7    2.05    0.33
   6  -2   7    1.56    0.33
  -6   2   7    2.11    0.31
   6  -2   7    2.00    0.34
   6   2  -7    1.14    0.32
   7  -2  -7    3.93    0.44
  -7  -2   7    4.42    0.44
  -7   2  -7    3.40    0.47
   7   2   7    3.70    0.47
   7   2   7    3.68    0.49
   7  -2  -7    3.44    0.58
   7   2  -7    3.25    0.48
  -7   2   7    3.53    0.36
   7  -2   7    3.79    0.44
   7  -2   7    3.31    0.45
  -7  -2  -7    3.66    0.49
  -7   2   7    4.60    0.46
   8   2   7    9.38    0.76
   8   2   7    8.88    0.71
   8  -2  -7    8.25    0.90
  -8   2  -7    8.15    0.72
   8  -2  -7    9.00    0.61
  -8  -2   7    8.59    0.58
   8   2  -7    8.11    0.79
  -8  -2  -7    9.94    0.71
   8  -2   7    9.63    0.67
  -8   2   7    8.14    0.60
   9   2   7    5.52    0.62
  -9   2  -7    5.32    0.63
  -9  -2   7    4.44    0.51
   9  -2  -7    3.74    0.71
   9   2   7    4.54    0.59
  -9  -2  -7    5.23    0.63
   9  -2   7    5.35    0.63
  -9   2   7    4.49    0.55
   9   2  -7    4.05    0.64
  10  -2  -7    0.34    0.50
  10   2   7    0.61    0.40
 -10   2  -7    0.44    0.38
 -10   2   7    0.19    0.36
  10   2  -7    0.42    0.48
 -10  -2  -7   -0.23    0.29
  10  -2   7    1.21    0.46
  11  -2  -7    5.17    0.85
  11   2   7    5.48    0.70
 -11   2  -7    6.01    0.74
  11  -2   7    5.20    0.68
  11   2  -7    4.55    0.77
 -11  -2  -7    5.20    0.70
 -11   2   7    4.57    0.66
   0  -2   8    6.04    0.31
   0   2  -8    5.84    0.27
   0  -2  -8    6.28    0.34
   0   2   8    6.03    0.44
   0  -2   8    6.58    0.42
   0  -2  -8    4.98    0.53
   0   2  -8    5.98    0.60
  -1  -2   8    3.27    0.25
   1   2   8    3.46    0.38
   1  -2  -8    3.86    0.27
  -1   2  -8    3.29    0.24
   1  -2  -8    3.64    0.47
  -1  -2   8    3.44    0.21
  -1  -2   8    3.45    0.34
  -1   2  -8    3.64    0.49
   1  -2   8    3.75    0.36
   1  -2   8    3.32    0.24
  -1   2   8    3.98    0.36
  -1  -2  -8    3.57    0.47
   1   2  -8    3.66    0.48
  -1  -2  -8    4.34    0.29
   2   2   8    0.65    0.22
   2  -2  -8    0.38    0.20
  -2  -2   8    0.31    0.16
  -2  -2   8    0.25    0.10
  -2   2  -8    0.03    0.12
  -2   2  -8    0.42    0.23
   2   2  -8    0.42    0.14
  -2   2   8    1.07    0.18
  -2   2   8    0.15    0.14
  -2  -2  -8    0.67    0.17
   2  -2   8    0.35    0.18
   2  -2   8    0.47    0.14
   2   2  -8    0.36    0.21
  -2  -2  -8    0.61    0.26
  -3   2  -8    3.64    0.35
   3  -2  -8    3.75    0.38
   3   2   8    4.10    0.46
   3  -2  -8    3.97    0.46
  -3  -2   8    3.53    0.36
  -3   2  -8    3.74    0.47
  -3  -2   8    3.73    0.25
   3   2  -8    3.96    0.34
   3  -2   8    4.09    0.34
   3  -2   8    4.19    0.43
  -3   2   8    3.43    0.30
   3   2  -8    4.05    0.47
  -3  -2  -8    3.08    0.45
  -3  -2  -8    3.71    0.35
  -3   2   8    3.62    0.34
   4  -2  -8    4.83    0.48
  -4   2  -8    4.57    0.43
   4  -2  -8    4.02    0.46
  -4  -2   8    4.05    0.38
  -4   2  -8    5.11    0.53
   4   2   8    4.83    0.50
   4   2  -8    4.47    0.48
   4  -2   8    4.43    0.45
   4  -2   8    4.33    0.38
  -4  -2  -8    6.28    0.60
  -4   2   8    4.80    0.40
   4   2  -8    4.89    0.42
  -4   2   8    4.67    0.34
  -4  -2  -8    4.57    0.44
  -5  -2   8    0.11    0.19
   5   2   8   -0.23    0.19
   5   2   8   -0.09    0.19
   5  -2  -8    0.05    0.21
  -5   2  -8   -0.07    0.20
   5  -2  -8    0.20    0.26
  -5   2  -8   -0.12    0.19
   5   2  -8    0.08    0.21
  -5   2   8    0.03    0.15
   5  -2   8   -0.06    0.20
  -5  -2  -8    0.02    0.22
  -5   2   8    0.15    0.16
   5   2  -8    0.26    0.22
  -5  -2  -8    0.19    0.21
   5  -2   8    0.05    0.23
  -6  -2   8    7.62    0.50
  -6   2  -8    8.12    0.59
   6  -2  -8    7.23    0.57
   6  -2  -8    7.13    0.71
  -6   2  -8    7.28    0.57
   6   2   8    6.72    0.50
   6   2   8    7.59    0.66
  -6   2   8    7.96    0.51
   6   2  -8    5.84    0.57
   6  -2   8    7.48    0.53
   6  -2   8    7.38    0.62
  -6  -2  -8    5.71    0.57
  -6   2   8    7.60    0.48
   6   2  -8    8.28    0.58
   7  -2  -8    1.44    0.34
   7   2   8    1.67    0.41
   7   2   8    1.70    0.35
  -7  -2   8    1.52    0.30
   7  -2  -8    2.10    0.52
  -7   2  -8    1.80    0.38
   7  -2   8    1.19    0.35
   7   2  -8    1.35    0.37
   7   2  -8    1.45    0.32
  -7   2   8    1.73    0.34
  -7  -2  -8    1.65    0.38
  -7   2   8    2.09    0.31
   7  -2   8    1.78    0.38
   8  -2  -8    0.22    0.27
   8  -2  -8    0.59    0.47
   8   2   8    0.70    0.36
  -8  -2   8    1.27    0.32
  -8   2  -8    0.54    0.31
  -8   2   8    0.19    0.28
   8   2  -8   -0.04    0.31
   8  -2   8    0.40    0.32
  -8  -2  -8   -0.08    0.30
   9   2   8    1.37    0.41
   9  -2  -8    1.59    0.58
  -9   2  -8    1.09    0.37
  -9  -2   8    1.70    0.37
   9  -2   8    2.06    0.47
   9   2  -8    1.86    0.54
  -9   2   8    1.97    0.43
  -9  -2  -8    1.37    0.41
 -10   2  -8    0.63    0.39
  10  -2  -8    0.38    0.52
 -10  -2  -8    0.71    0.38
  10  -2   8    0.33    0.38
 -10   2   8    0.64    0.37
  10   2  -8    0.85    0.49
   0  -2   9    0.18    0.18
   0   2  -9    0.22    0.23
   0  -2   9    0.13    0.11
   0   2   9    0.03    0.17
   0   2  -9   -0.01    0.10
   0  -2  -9    0.30    0.23
   0  -2  -9   -0.02    0.13
   1  -2  -9   19.06    0.64
  -1   2  -9   17.55    0.59
  -1   2  -9   15.98    0.92
   1  -2  -9   17.63    0.94
  -1  -2   9   17.69    0.75
  -1  -2   9   18.42    0.61
   1   2   9   18.48    0.82
  -1  -2  -9   17.86    0.66
   1  -2   9   18.67    0.79
  -1   2   9   18.47    0.76
  -1  -2  -9   19.42    0.98
   1   2  -9   18.00    0.96
   1  -2   9   18.04    0.60
   2   2   9    1.44    0.30
  -2   2  -9    2.44    0.25
   2  -2  -9    1.79    0.35
  -2   2  -9    1.66    0.38
  -2  -2   9    1.43    0.26
   2   2  -9    1.44    0.36
   2  -2   9    1.89    0.31
   2   2  -9    1.53    0.22
  -2  -2  -9    1.93    0.40
   2  -2   9    1.63    0.22
  -2   2   9    1.42    0.22
  -2   2   9    1.81    0.28
  -2  -2  -9    1.84    0.25
  -3   2  -9    7.25    0.43
   3   2   9    4.76    0.50
  -3   2  -9    6.08    0.62
  -3  -2   9    6.22    0.44
   3  -2  -9    5.03    0.53
   3   2  -9    5.23    0.41
   3   2  -9    5.29    0.58
  -3  -2  -9    4.52    0.41
   3  -2   9    5.65    0.52
  -3   2   9    5.75    0.36
  -3  -2  -9    5.02    0.59
  -3   2   9    6.37    0.44
   3  -2   9    5.07    0.36
  -4   2  -9    1.17    0.35
  -4  -2   9    1.31    0.28
   4   2   9    1.36    0.35
  -4   2  -9    1.95    0.32
   4   2  -9    0.75    0.29
  -4  -2  -9    1.96    0.33
   4   2  -9    1.45    0.27
   4  -2   9    1.40    0.33
  -4  -2  -9    1.73    0.39
  -4   2   9    1.95    0.30
  -4   2   9    1.89    0.27
   4  -2   9    1.49    0.27
   5   2   9    0.08    0.28
  -5   2  -9    0.85    0.31
   5  -2  -9    0.43    0.27
  -5   2  -9   -0.01    0.22
  -5  -2   9    0.13    0.21
   5   2  -9    0.42    0.25
   5   2  -9    0.43    0.28
  -5   2   9    0.40    0.20
  -5   2   9    0.64    0.22
  -5  -2  -9    0.49    0.25
   5  -2   9    0.59    0.24
   5  -2   9    0.14    0.26
   6  -2  -9    1.50    0.35
   6   2   9    1.48    0.38
  -6   2  -9    2.25    0.41
  -6   2  -9    1.76    0.35
  -6  -2   9    2.07    0.35
  -6   2   9    1.73    0.30
  -6  -2  -9    2.20    0.40
   6   2  -9    1.45    0.34
   6   2  -9    2.31    0.39
   6  -2   9    1.60    0.37
   6  -2   9    1.45    0.34
  -6   2   9    1.71    0.31
  -7  -2   9    1.73    0.33
  -7   2  -9    1.29    0.35
   7  -2  -9    1.41    0.38
   7   2   9    0.96    0.37
   7  -2   9    2.06    0.41
  -7   2   9    1.26    0.28
   7   2  -9    1.40    0.38
   7  -2   9    1.30    0.35
  -7  -2  -9    1.53    0.39
  -7   2   9    1.68    0.34
   7   2  -9    0.96    0.33
   8   2   9    2.82    0.50
   8  -2  -9    1.71    0.40
  -8   2  -9    2.10    0.42
  -8  -2   9    2.40    0.40
   8   2  -9    2.78    0.53
  -8  -2  -9    2.06    0.43
  -8   2   9    2.75    0.45
   8  -2   9    2.08    0.43
   9   2   9    6.71    0.72
  -9  -2   9    6.25    0.61
  -9   2  -9    6.14    0.67
   9  -2   9    6.22    0.67
  -9  -2  -9    6.37    0.68
   9   2  -9    6.64    0.79
 -10   2  -9    0.75    0.40
 -10  -2  -9    0.54    0.36
  10  -2   9    0.60    0.42
  10   2  -9    0.88    0.50
   0  -2 -10    4.60    0.59
   0  -2  10    4.83    0.30
   0   2  10    4.09    0.43
   0   2 -10    4.51    0.59
   0  -2 -10    3.71    0.33
   0  -2  10    3.86    0.41
   1  -2 -10    2.16    0.25
  -1  -2  10    1.79    0.22
  -1  -2  10    1.93    0.31
   1  -2 -10    1.49    0.37
  -1   2 -10    1.60    0.40
   1   2  10    1.68    0.32
   1   2 -10    2.50    0.45
   1  -2  10    1.06    0.27
  -1  -2 -10    1.62    0.24
  -1   2  10    0.93    0.25
  -1  -2 -10    2.06    0.46
   2  -2 -10   39.90    1.56
  -2   2 -10   40.80    1.15
  -2   2 -10   39.81    1.61
  -2  -2  10   38.98    1.32
   2   2  10   40.53    1.45
   2  -2  10   38.81    1.37
  -2   2  10   40.59    1.31
  -2   2  10   39.68    1.15
   2   2 -10   41.59    1.61
   2   2 -10   40.69    1.15
  -2  -2 -10   39.93    1.21
  -2  -2 -10   38.15    1.60
  -3   2 -10    3.18    0.49
  -3   2 -10    3.33    0.35
  -3  -2  10    3.59    0.40
   3  -2 -10    3.03    0.48
   3   2  10    2.94    0.43
  -3  -2 -10    3.45    0.55
   3  -2  10    4.02    0.49
   3   2 -10    2.87    0.47
   3   2 -10    3.24    0.34
  -3   2  10    3.72    0.39
  -3   2  10    4.27    0.36
  -3  -2 -10    3.86    0.40
  -4   2 -10   26.44    1.24
  -4   2 -10   26.60    1.01
   4  -2 -10   29.35    1.24
  -4  -2  10   29.65    1.08
   4   2  10   27.48    1.19
  -4  -2 -10   30.29    1.33
  -4  -2 -10   25.55    1.02
   4  -2  10   27.65    1.15
   4   2 -10   28.79    1.02
   4  -2  10   26.65    0.95
  -4   2  10   30.67    0.96
   4   2 -10   26.60    1.22
  -4   2  10   26.95    1.01
  -5   2 -10    1.15    0.37
   5  -2 -10    0.91    0.34
  -5  -2  10    0.89    0.28
   5   2  10    0.85    0.36
  -5   2 -10    0.97    0.30
  -5   2  10    1.02    0.26
   5  -2  10    1.03    0.36
   5   2 -10    0.94    0.34
  -5   2  10    0.94    0.26
  -5  -2 -10    0.72    0.29
   5   2 -10    0.73    0.29
  -6  -2  10   38.11    1.33
   6  -2 -10   39.49    1.49
  -6   2 -10   38.16    1.39
   6   2  10   38.30    1.51
   6  -2  10   38.18    1.47
   6   2 -10   38.88    1.43
  -6  -2 -10   37.86    1.43
  -6   2  10   37.46    1.29
  -6   2  10   37.44    1.26
   6   2 -10   40.25    1.50
  -7   2 -10    3.21    0.47
  -7  -2  10    3.65    0.45
   7   2  10    3.42    0.52
   7  -2 -10    3.49    0.50
   7   2 -10    3.56    0.50
  -7  -2 -10    3.05    0.50
   7   2 -10    4.00    0.58
   7  -2  10    3.42    0.52
  -7   2  10    3.79    0.42
  -8   2 -10   11.31    0.80
  -8  -2  10   13.04    0.76
   8   2  10   10.17    0.86
   8  -2 -10   12.67    0.80
  -8  -2 -10   11.85    0.81
   8   2 -10   12.86    1.03
   9   2  10    0.47    0.42
  -9  -2  10   -0.08    0.28
  -9   2 -10    0.11    0.31
  -9  -2 -10   -0.19    0.33
 -10   2 -10   17.27    1.05
   0   2  11    0.03    0.21
   0  -2 -11    0.01    0.16
   0  -2  11   -0.03    0.19
   0  -2 -11    0.06    0.29
   0   2 -11    0.12    0.27
  -1   2 -11   15.81    0.98
   1  -2 -11   14.17    0.92
   1   2  11   14.21    0.79
  -1  -2  11   13.96    0.73
   1  -2 -11   15.28    0.61
  -1  -2 -11   13.32    0.59
  -1   2  11   15.07    0.76
   1  -2  11   13.78    0.76
  -1  -2 -11   13.93    0.96
   1   2 -11   13.85    0.92
   2   2  11    0.30    0.27
  -2   2 -11    0.08    0.28
   2  -2 -11   -0.13    0.25
  -2  -2  11    0.16    0.21
  -2  -2 -11    0.07    0.31
  -2  -2 -11    0.08    0.18
   2   2 -11    0.40    0.33
  -2   2  11    0.27    0.23
  -2   2  11   -0.08    0.17
   2  -2  11   -0.05    0.22
   3  -2 -11   39.18    1.60
  -3  -2  11   40.23    1.38
   3   2  11   39.74    1.52
  -3   2 -11   40.29    1.65
  -3   2  11   40.17    1.21
  -3  -2 -11   40.40    1.70
   3  -2  11   40.83    1.49
   3   2 -11   42.45    1.69
  -3   2  11   39.90    1.36
  -3  -2 -11   41.99    1.32
   4  -2 -11    3.13    0.51
  -4   2 -11    3.21    0.39
   4   2  11    3.12    0.51
  -4  -2  11    3.26    0.44
  -4   2 -11    2.60    0.49
   4  -2  11    2.57    0.43
   4   2 -11    2.91    0.50
  -4   2  11    3.63    0.37
  -4  -2 -11    2.82    0.40
  -4   2  11    2.39    0.36
  -4  -2 -11    2.53    0.53
   5  -2 -11   54.99    1.98
   5   2  11   60.70    2.00
  -5  -2  11   53.97    1.77
  -5   2 -11   59.58    2.06
  -5   2 -11   60.51    1.78
   5  -2  11   53.99    1.91
  -5   2  11   59.79    1.77
   5   2 -11   57.31    2.03
  -5  -2 -11   52.99    1.78
   6   2  11    0.36    0.33
  -6  -2  11    0.54    0.29
  -6   2 -11    0.32    0.28
   6  -2 -11    0.59    0.34
   6   2 -11    0.13    0.29
   6  -2  11    0.16    0.32
  -6  -2 -11    0.36    0.30
  -6   2  11    0.42    0.25
  -7   2 -11   33.46    1.31
  -7  -2  11   32.17    1.25
   7  -2 -11   28.55    1.31
   7   2  11   29.42    1.35
  -7  -2 -11   31.34    1.32
   7  -2  11   30.90    1.33
  -7   2  11   31.14    1.18
   7   2 -11   29.87    1.32
  -8   2 -11    0.32    0.33
   8  -2 -11    0.27    0.33
  -8  -2  11    0.28    0.28
   8   2  11   -0.11    0.36
  -8  -2 -11   -0.30    0.32
  -9   2 -11    9.91    0.85
   9   2  11   11.52    0.95
  -9  -2  11   11.15    0.78
  -9  -2 -11   11.73    0.84
   0  -2 -12   37.79    1.72
   0  -2 -12   41.05    1.21
   0   2 -12   37.49    1.71
   0   2  12   41.21    1.46
   0  -2  12   41.15    1.46
   1  -2 -12    0.41    0.19
   1   2  12    0.09    0.27
  -1   2 -12   -0.15    0.31
   1  -2 -12    0.37    0.33
  -1  -2  12   -0.18    0.19
  -1   2  12    0.07    0.19
   1   2 -12    0.21    0.33
  -1   2  12    0.47    0.26
   1  -2  12    0.58    0.28
  -1  -2 -12   -0.16    0.30
  -1  -2 -12    0.27    0.20
  -2   2 -12   32.61    1.50
  -2  -2  12   32.27    1.22
   2   2  12   29.61    1.29
   2  -2 -12   30.32    1.43
   2  -2  12   29.97    1.27
   2   2 -12   31.77    1.51
  -2   2  12   29.36    1.17
  -2  -2 -12   28.80    1.46
  -2  -2 -12   30.24    1.05
  -3  -2  12    2.98    0.43
   3  -2 -12    2.91    0.53
  -3   2 -12    3.46    0.56
   3   2  12    3.68    0.53
  -3  -2 -12    3.46    0.40
  -3   2  12    3.66    0.44
   3  -2  12    4.10    0.56
  -3  -2 -12    3.92    0.63
   3   2 -12    2.87    0.54
   4   2  12   67.73    2.31
  -4   2 -12   73.87    2.50
   4  -2 -12   73.56    2.48
  -4  -2  12   72.13    2.18
  -4  -2 -12   73.43    2.54
  -4   2  12   75.44    2.16
   4  -2  12   70.54    2.30
   4   2 -12   74.46    2.52
  -4  -2 -12   70.95    2.09
  -5  -2  12    0.19    0.26
   5   2  12   -0.23    0.31
  -5   2 -12    0.19    0.32
   5  -2 -12    0.72    0.38
   5   2 -12   -0.19    0.31
  -5  -2 -12    0.29    0.29
   5  -2  12   -0.18    0.29
  -5   2  12    0.41    0.27
   6   2  12   57.30    2.04
   6  -2 -12   58.27    2.08
  -6  -2  12   56.13    1.86
  -6  -2 -12   57.29    1.91
   6   2 -12   54.93    2.05
   6  -2  12   59.88    2.03
  -6   2  12   59.95    1.84
  -7  -2  12    0.06    0.26
   7   2  12    0.13    0.36
   7  -2 -12    0.09    0.36
  -7   2  12   -0.09    0.26
   7   2 -12    0.42    0.37
  -7  -2 -12    0.40    0.34
   7  -2  12   -0.34    0.30
   8  -2 -12   31.12    1.42
  -8   2 -12   32.33    1.35
   8   2  12   31.12    1.45
  -8  -2  12   32.23    1.33
  -8  -2 -12   30.77    1.38
   0   2 -13   -0.03    0.31
   0  -2 -13   -0.46    0.31
   0  -2  13   -0.11    0.25
   0   2  13    0.26    0.29
  -1  -2  13  109.45    3.10
   1  -2 -13  116.86    3.61
  -1   2 -13  114.80    3.60
   1   2  13  109.93    3.17
   1  -2  13  108.10    3.14
  -1   2  13  108.45    3.09
  -1  -2 -13  107.57    3.56
   1   2 -13  114.86    3.63
  -1  -2 -13  111.92    2.80
  -2   2 -13    3.87    0.63
  -2  -2  13    2.88    0.47
   2   2  13    2.54    0.47
   2  -2 -13    3.97    0.62
  -2   2  13    3.11    0.46
  -2  -2 -13    2.52    0.36
  -2  -2 -13    3.06    0.60
   2   2 -13    2.54    0.60
   2  -2  13    3.73    0.56
   3  -2 -13   60.11    2.30
  -3  -2  13   61.77    2.00
  -3   2 -13   67.25    2.39
   3   2  13   62.61    2.16
  -3   2  13   60.18    1.95
   3   2 -13   62.12    2.36
  -3  -2 -13   64.45    1.86
  -3  -2 -13   65.58    2.42
   3  -2  13   61.74    2.12
  -4   2 -13    1.12    0.42
   4  -2 -13    0.85    0.38
  -4  -2  13    0.97    0.35
   4   2  13    0.69    0.38
  -4  -2 -13    1.64    0.52
  -4  -2 -13    1.17    0.34
   4   2 -13    1.26    0.46
  -4   2  13    0.71    0.30
   4  -2  13    1.26    0.41
  -5   2 -13   51.57    1.99
   5   2  13   50.56    1.90
  -5  -2  13   48.73    1.71
   5  -2 -13   47.25    1.92
   5   2 -13   47.22    1.95
  -5   2  13   50.11    1.68
   5  -2  13   49.35    1.85
  -5  -2 -13   48.64    1.67
   6   2  13    6.63    0.75
  -6  -2  13    5.15    0.60
   6  -2 -13    5.75    0.73
   6   2 -13    4.72    0.68
   6  -2  13    5.01    0.67
  -6   2  13    5.27    0.57
  -6  -2 -13    5.61    0.63
   7   2  13   50.34    1.94
  -7  -2  13   53.25    1.81
   7  -2 -13   49.75    1.95
  -7  -2 -13   50.93    1.82
   7  -2  13   50.16    1.90
   7   2 -13   50.69    1.97
   0   2 -14  130.82    4.15
   0  -2 -14  133.40    4.15
   0  -2  14  130.66    3.65
   0   2  14  128.36    3.62
  -1   2 -14   -0.18    0.35
   1   2  14   -0.17    0.29
  -1  -2  14    0.45    0.33
   1  -2 -14    0.20    0.41
  -1   2  14    0.29    0.31
  -1  -2 -14    0.19    0.39
   1   2 -14   -0.20    0.34
   1  -2  14    0.20    0.32
  -2  -2  14   79.82    2.54
  -2   2 -14   91.46    3.03
   2   2  14   85.34    2.70
   2  -2 -14   81.79    2.95
  -2  -2 -14   87.01    3.04
  -2   2  14   82.65    2.54
   2  -2  14   85.33    2.68
   2   2 -14   89.14    3.09
   3   2  14   -0.09    0.36
  -3   2 -14    0.11    0.34
   3  -2 -14    0.03    0.33
  -3  -2  14    0.19    0.27
  -3   2  14    0.66    0.32
   3   2 -14   -0.19    0.36
   3  -2  14   -0.15    0.31
  -3  -2 -14   -0.50    0.38
  -4  -2  14   54.48    1.92
   4   2  14   52.80    2.06
   4  -2 -14   55.94    2.23
  -4   2 -14   60.61    2.28
  -4   2  14   57.86    1.92
   4   2 -14   59.95    2.33
   4  -2  14   54.24    2.06
  -4  -2 -14   65.18    2.37
  -5  -2  14    0.10    0.31
   5  -2 -14    0.73    0.44
  -5   2 -14   -0.02    0.38
   5   2  14   -0.29    0.37
  -5   2  14   -0.08    0.27
   5   2 -14   -0.17    0.37
   5  -2  14   -0.23    0.34
  -5  -2 -14    0.12    0.32
   6   2  14   43.52    1.78
  -6  -2  14   41.04    1.60
   6  -2 -14   43.00    1.82
   6  -2  14   41.32    1.74
  -6   2  14   42.14    1.57
   6   2 -14   45.92    1.87
  -6  -2 -14   40.05    1.58
   0   2 -15    0.21    0.42
   0  -2 -15   -0.05    0.42
   0   2  15   -0.26    0.30
   0  -2  15    0.09    0.32
   1   2  15   75.48    2.53
   1  -2 -15   70.64    2.81
  -1  -2  15   78.98    2.50
  -1   2 -15   80.72    2.94
   1   2 -15   82.41    2.99
  -1  -2 -15   72.73    2.85
   1  -2  15   77.17    2.53
  -1   2  15   75.86    2.45
  -2  -2  15    5.99    0.67
   2   2  15    4.49    0.66
  -2   2 -15    5.24    0.81
   2  -2 -15    4.92    0.78
  -2  -2 -15    4.70    0.78
  -2   2  15    3.00    0.52
   2   2 -15    5.60    0.83
   2  -2  15    4.29    0.63
  -3   2 -15   78.64    2.78
   3   2  15   71.42    2.50
   3  -2 -15   72.42    2.74
  -3  -2  15   69.80    2.33
  -3  -2 -15   78.07    2.81
   3   2 -15   77.25    2.85
   3  -2  15   69.91    2.48
  -3   2  15   69.30    2.30
  -4   2 -15    1.97    0.55
   4   2  15    0.47    0.43
  -4  -2  15    1.28    0.42
   4  -2 -15    1.11    0.51
  -4   2  15    1.27    0.39
   4  -2  15    1.11    0.45
   4   2 -15    0.65    0.48
   5   2  15   59.35    2.23
  -5  -2  15   60.51    2.07
   5  -2 -15   56.70    2.31
  -5   2  15   58.89    2.01
   5   2 -15   63.44    2.43
   5  -2  15   57.46    2.19
   0  -2 -16   49.66    2.24
   0  -2  16   48.56    1.91
   0   2  16   48.23    1.89
   0   2 -16   49.84    2.27
  -1  -2  16    2.38    0.52
   1  -2 -16    2.12    0.62
   1   2  16    3.44    0.59
  -1   2 -16    3.51    0.73
  -1  -2 -16    3.48    0.72
  -1   2  16    2.67    0.56
   1   2 -16    2.66    0.68
   1  -2  16    3.16    0.61
   2   2  16   68.52    2.49
  -2   2 -16   75.17    2.86
   2  -2 -16   73.51    2.85
  -2  -2  16   70.65    2.42
   2   2 -16   71.24    2.88
   2  -2  16   72.07    2.54
  -2   2  16   68.59    2.37
  -2  -2 -16   83.54    2.94
   3   2  16    2.97    0.61
  -3  -2  16    4.44    0.64
   3  -2 -16    3.51    0.72
  -3   2 -16    6.03    0.86
   3  -2  16    4.33    0.69
   3   2 -16    4.36    0.83
  -3   2  16    5.26    0.66
  -3  -2 -16    5.35    0.86
   0  -3   0   -0.04    0.05
   0  -3   0   -0.15    0.07
   0  -3   0   -0.04    0.06
   0  -3   0    0.48    0.08
   1  -3   0    0.29    0.10
  -1  -3   0    0.31    0.07
  -1  -3   0   -0.04    0.06
   1  -3   0   -0.01    0.06
  -1  -3   0    0.13    0.07
  -1  -3   0    0.01    0.07
  -1   3   0    0.18    0.06
   1  -3   0    0.09    0.04
   2   3   0  404.86    8.64
  -2   3   0  400.21    8.61
   2  -3   0  390.92    9.29
   2   3   0  389.23    9.20
   2  -3   0  412.64    8.70
  -2  -3   0  391.34    8.89
  -2  -3   0  417.77    8.64
   3   3   0    0.21    0.07
   3  -3   0    0.26    0.16
  -3   3   0   -0.13    0.05
   3  -3   0    0.01    0.11
  -3   3   0    0.51    0.14
   3   3   0    0.97    0.17
  -3  -3   0    0.92    0.19
   4   3   0   26.14    0.85
  -4   3   0   24.93    0.66
  -4   3   0   23.98    0.80
   4  -3   0   25.50    0.80
   4  -3   0   23.04    0.90
  -4  -3   0   25.06    0.88
  -4  -3   0   25.13    0.81
  -5   3   0    0.19    0.09
  -5  -3   0    0.21    0.16
   5  -3   0    0.58    0.23
   5   3   0   -0.21    0.15
  -5   3   0    0.61    0.18
   5  -3   0    0.01    0.11
  -5  -3   0   -0.09    0.11
   6  -3   0    9.46    0.64
  -6  -3   0    9.06    0.50
  -6  -3   0   10.25    0.61
   6  -3   0   10.47    0.49
  -6   3   0    9.94    0.42
   6   3   0   10.34    0.63
  -6   3   0    8.63    0.52
  -7  -3   0    0.12    0.17
  -7  -3   0    0.39    0.25
   7  -3   0    0.01    0.17
  -7   3   0    0.10    0.20
   7   3   0    0.40    0.26
   7  -3   0    0.56    0.28
  -8  -3   0   17.78    0.95
   8   3   0   15.91    0.95
  -8  -3   0   17.52    0.82
  -8   3   0   17.73    0.90
   8  -3   0   19.21    1.03
  -9  -3   0   -0.04    0.26
  -9  -3   0    0.33    0.24
   9  -3   0   -0.14    0.36
  -9   3   0    0.00    0.26
   9   3   0    0.30    0.36
 -10  -3   0    0.32    0.27
 -10   3   0    0.08    0.33
  10  -3   0   -0.02    0.37
 -10  -3   0   -0.05    0.29
  10   3   0   -0.05    0.37
  11   3   0    0.00    0.46
 -11  -3   0    0.76    0.41
 -11   3   0    0.89    0.47
  11  -3   0    0.06    0.43
  12   3   0    7.75    0.99
 -12  -3   0    8.39    0.92
  12  -3   0    7.55    0.92
 -12   3   0    8.84    0.99
   0  -3  -1  182.27    4.25
   0   3  -1  193.71    4.04
   0  -3  -1  192.35    4.08
   0  -3  -1  192.13    4.07
   0   3  -1  190.47    4.47
   0  -3  -1  183.82    4.42
   0  -3   1  188.92    4.19
  -1   3  -1   19.21    0.51
   1  -3  -1   19.41    0.60
  -1  -3   1   20.26    0.48
  -1  -3   1   19.20    0.53
   1  -3  -1   19.49    0.52
  -1  -3   1   19.32    0.55
  -1  -3  -1   20.29    0.61
  -1   3   1   19.45    0.53
  -1  -3  -1   18.78    0.55
  -1  -3  -1   20.13    0.51
   1  -3   1   18.31    0.61
   1  -3   1   19.31    0.49
   1  -3   1   20.20    0.55
  -1   3   1   19.94    0.51
  -1  -3  -1   19.39    0.53
   1   3  -1   19.57    0.62
   2   3   1   12.77    0.40
   2  -3  -1   11.73    0.43
   2  -3  -1   10.89    0.42
  -2   3  -1   11.57    0.39
  -2  -3   1   12.14    0.40
  -2  -3   1   10.71    0.40
   2   3  -1   12.63    0.43
  -2   3   1   11.99    0.29
   2  -3   1   10.44    0.43
   2   3  -1   11.19    0.39
   2  -3   1   11.54    0.30
  -2  -3  -1   11.02    0.44
  -2  -3  -1   11.79    0.42
  -2  -3  -1   11.41    0.34
   2  -3   1   11.71    0.43
   3  -3  -1    7.86    0.42
  -3   3  -1    7.14    0.34
  -3  -3   1    7.22    0.38
   3   3   1    7.94    0.36
   3  -3  -1    7.14    0.34
  -3  -3   1    7.71    0.34
  -3  -3  -1    7.53    0.37
  -3  -3  -1    7.17    0.39
   3   3  -1    7.14    0.34
   3  -3   1    6.85    0.35
   3   3  -1    7.05    0.28
  -3   3   1    7.41    0.22
   3  -3   1    7.08    0.26
  -4  -3   1   60.91    1.68
  -4  -3   1   59.94    1.59
  -4   3  -1   62.14    1.60
   4   3   1   62.63    1.64
   4  -3  -1   60.31    1.62
   4  -3   1   59.61    1.63
  -4  -3  -1   59.70    1.68
   4   3  -1   61.77    1.49
   4   3  -1   60.58    1.62
   4  -3   1   56.40    1.69
  -4  -3  -1   63.24    1.65
  -4   3   1   58.45    1.56
   4  -3   1   62.93    1.50
  -4   3   1   62.30    1.43
  -5  -3   1    0.03    0.13
   5  -3  -1    0.06    0.12
  -5   3  -1    0.10    0.16
  -5  -3   1   -0.09    0.16
   5   3   1    0.30    0.19
   5  -3  -1    0.06    0.21
   5  -3   1    0.18    0.19
   5  -3   1    0.21    0.13
  -5   3   1    0.10    0.14
   5   3  -1    0.05    0.07
   5  -3   1    0.15    0.12
  -5   3   1    0.22    0.10
  -5  -3  -1    0.23    0.15
  -5  -3  -1    0.20    0.18
   5   3  -1    0.34    0.20
   6   3   1    2.75    0.40
  -6   3  -1    3.07    0.37
   6  -3  -1    2.87    0.44
   6  -3  -1    3.03    0.30
  -6  -3   1    2.69    0.38
  -6  -3   1    2.45    0.30
  -6   3   1    3.24    0.35
  -6   3   1    3.21    0.25
   6  -3   1    3.30    0.32
   6  -3   1    2.88    0.41
  -6  -3  -1    2.94    0.39
   6  -3   1    3.60    0.30
   6   3  -1    3.04    0.40
  -6  -3  -1    2.86    0.33
   7   3   1    1.69    0.36
  -7   3  -1    1.57    0.32
   7  -3  -1    1.74    0.26
  -7  -3   1    1.62    0.35
  -7  -3   1    1.43    0.26
   7  -3  -1    1.81    0.40
  -7  -3  -1    1.57    0.30
  -7  -3  -1    1.27    0.32
   7  -3   1    2.01    0.39
   7   3  -1    1.98    0.37
  -7   3   1    1.60    0.31
   7  -3   1    2.01    0.27
  -8   3  -1   25.97    1.11
   8   3   1   24.04    1.14
  -8  -3   1   22.71    1.10
   8  -3  -1   25.71    1.24
  -8  -3   1   21.78    0.93
  -8  -3  -1   25.97    1.13
   8   3  -1   23.33    1.12
  -8  -3  -1   24.14    1.00
  -8   3   1   24.14    1.05
   8  -3   1   22.66    1.12
  -9  -3   1    0.54    0.25
  -9   3  -1    0.69    0.35
  -9  -3   1    0.46    0.32
   9   3   1    0.76    0.42
   9  -3  -1    0.21    0.34
   9   3  -1    0.65    0.37
  -9  -3  -1    1.22    0.40
  -9  -3  -1    0.92    0.30
   9  -3   1    0.65    0.37
  -9   3   1    0.69    0.32
  10  -3  -1   10.90    1.00
 -10  -3   1   11.31    0.73
 -10   3  -1   10.26    0.91
 -10  -3   1   12.22    0.89
  10   3   1   11.08    1.02
  10   3  -1   10.11    0.95
 -10   3   1   10.25    0.88
 -10  -3  -1   11.84    0.96
  10  -3   1   10.21    0.93
 -10  -3  -1   11.71    0.77
  11  -3  -1   -0.15    0.46
 -11  -3   1    0.43    0.41
  11   3   1   -0.22    0.44
 -11   3  -1    0.71    0.43
 -11  -3  -1   -0.19    0.32
  11   3  -1    0.14    0.43
 -11   3   1    0.21    0.40
  11  -3   1    0.42    0.43
 -12  -3   1    7.38    0.89
  12  -3  -1    7.22    0.91
 -12   3  -1    8.94    0.98
  12   3   1    7.21    0.94
 -12   3   1    7.27    0.87
  12  -3   1    8.50    0.94
  12   3  -1    7.40    0.95
 -12  -3  -1    7.54    0.86
   0  -3  -2   -0.15    0.07
   0   3  -2    0.14    0.11
   0   3   2    0.12    0.10
   0  -3  -2    0.03    0.04
   0  -3   2    0.15    0.07
   0   3  -2   -0.01    0.04
   0  -3  -2   -0.17    0.05
   0  -3   2    0.00    0.06
  -1   3  -2   48.25    1.10
   1  -3  -2   44.74    1.24
  -1  -3   2   46.10    1.16
  -1   3  -2   48.10    1.31
   1  -3  -2   47.42    1.09
  -1  -3   2   47.15    1.13
  -1  -3   2   48.21    1.03
   1   3   2   46.60    1.28
   1   3   2   47.96    1.08
  -1  -3  -2   45.26    1.20
   1  -3   2   46.15    1.12
  -1   3   2   47.88    1.14
   1   3  -2   46.76    1.32
  -1  -3  -2   46.97    1.14
  -1   3   2   47.06    1.12
  -2   3  -2   33.78    1.00
   2  -3  -2   33.82    0.97
  -2   3  -2   32.86    0.88
  -2  -3   2   31.86    0.89
  -2  -3   2   32.33    0.86
   2   3   2   34.61    0.88
   2  -3  -2   34.54    0.92
  -2   3   2   34.14    0.81
  -2  -3  -2   34.02    0.91
   2   3  -2   34.74    0.98
   2  -3   2   34.59    0.92
  -2   3   2   33.00    0.86
   2   3  -2   33.84    0.88
   2  -3   2   33.08    0.82
  -2  -3  -2   33.18    0.87
  -2  -3  -2   32.51    0.99
  -3  -3   2   24.39    0.74
  -3   3  -2   24.91    0.80
   3   3   2   23.91    0.76
  -3  -3   2   24.28    0.78
  -3   3  -2   24.82    0.75
   3  -3  -2   23.41    0.76
   3  -3  -2   21.85    0.81
  -3   3   2   24.83    0.62
  -3   3   2   23.86    0.72
  -3  -3  -2   23.70    0.63
  -3  -3  -2   24.14    0.79
   3   3  -2   25.54    0.75
   3   3  -2   24.39    0.73
   3  -3   2   24.47    0.67
   3  -3   2   25.73    0.81
  -3  -3  -2   24.44    0.82
   4  -3  -2    2.62    0.34
  -4  -3   2    2.50    0.25
   4   3   2    3.45    0.32
  -4  -3   2    2.47    0.29
  -4   3  -2    2.22    0.26
  -4   3  -2    2.58    0.26
   4  -3  -2    2.61    0.25
  -4   3   2    2.56    0.16
  -4  -3  -2    2.18    0.27
   4  -3   2    2.48    0.31
   4   3  -2    2.95    0.20
  -4  -3  -2    2.91    0.33
  -4   3   2    2.74    0.26
   4   3  -2    2.77    0.28
   4  -3   2    2.50    0.22
   5   3   2   43.17    1.36
   5  -3  -2   43.03    1.49
  -5   3  -2   44.57    1.29
   5  -3  -2   43.13    1.28
  -5   3  -2   44.38    1.33
  -5  -3   2   43.40    1.36
  -5  -3   2   42.55    1.26
   5   3  -2   44.09    1.16
  -5  -3  -2   44.31    1.35
  -5   3   2   43.51    1.26
   5  -3   2   44.89    1.21
   5  -3   2   44.19    1.42
  -5  -3  -2   45.46    1.41
   5   3  -2   45.10    1.36
  -5   3   2   44.46    1.12
  -6   3  -2    3.95    0.43
  -6  -3   2    4.07    0.44
   6  -3  -2    4.21    0.53
  -6  -3   2    3.74    0.35
  -6   3  -2    3.45    0.33
   6   3   2    3.21    0.42
   6  -3  -2    3.19    0.31
   6   3  -2    3.81    0.42
  -6  -3  -2    3.41    0.38
  -6   3   2    3.45    0.36
   6  -3   2    3.42    0.31
  -6  -3  -2    3.96    0.46
   6  -3   2    2.92    0.41
  -6   3   2    3.96    0.26
  -7   3  -2   16.43    0.68
   7   3   2   16.18    0.85
   7  -3  -2   17.23    0.96
  -7   3  -2   17.56    0.85
  -7  -3   2   15.52    0.70
   7  -3  -2   15.51    0.66
  -7  -3   2   14.60    0.80
  -7  -3  -2   16.11    0.85
   7  -3   2   16.01    0.86
  -7   3   2   15.42    0.75
  -7  -3  -2   15.24    0.76
   7   3  -2   16.15    0.84
   8  -3  -2    2.60    0.51
  -8  -3   2    2.98    0.47
  -8  -3   2    3.08    0.38
   8   3   2    2.78    0.48
  -8   3  -2    2.88    0.47
   8  -3   2    3.64    0.51
   8   3  -2    3.80    0.55
  -8   3   2    3.31    0.44
  -8  -3  -2    3.00    0.46
  -8  -3  -2    3.66    0.46
  -9   3  -2   17.68    1.00
  -9  -3   2   16.34    0.83
   9  -3  -2   17.82    1.11
  -9  -3   2   17.75    1.03
   9   3   2   17.89    1.06
   9   3  -2   18.47    1.07
  -9  -3  -2   18.32    0.92
  -9  -3  -2   18.41    0.99
   9  -3   2   18.89    1.06
  -9   3   2   16.77    0.93
 -10  -3   2    0.80    0.39
  10  -3  -2    1.68    0.55
 -10   3  -2    1.68    0.46
  10   3   2    0.88    0.49
 -10  -3   2    0.81    0.32
  10   3  -2    0.12    0.40
  10  -3   2    0.37    0.39
 -10  -3  -2    0.42    0.37
 -10  -3  -2    0.81    0.35
 -10   3   2    0.98    0.38
 -11  -3   2    8.82    0.90
 -11   3  -2    8.09    0.87
  11   3   2    9.95    0.99
  11  -3  -2    7.71    0.92
 -11   3   2    7.21    0.80
  11   3  -2    7.90    0.93
  11  -3   2    8.43    0.88
 -11  -3  -2    9.12    0.90
  12  -3  -2    0.51    0.56
 -12  -3   2    1.16    0.51
  12   3   2   -0.01    0.49
 -12   3  -2    0.52    0.48
 -12   3   2    0.34    0.44
 -12  -3  -2    0.71    0.47
  12  -3   2    0.55    0.54
  12   3  -2    0.03    0.52
   0   3   3   98.36    2.35
   0   3  -3   96.47    2.12
   0  -3   3   98.56    2.22
   0   3  -3   95.35    2.56
   0  -3  -3   97.72    2.10
   0  -3   3  100.50    2.29
   0  -3  -3  101.36    2.45
   0  -3  -3   98.94    2.22
   1  -3  -3   26.81    0.82
   1  -3  -3   26.75    0.71
  -1   3  -3   27.79    0.71
   1   3   3   24.70    0.84
  -1  -3   3   28.40    0.72
   1   3   3   26.31    0.65
  -1  -3   3   25.54    0.74
  -1   3  -3   26.61    0.90
   1  -3  -3   27.95    0.65
  -1  -3  -3   26.93    0.79
   1  -3   3   26.35    0.72
  -1  -3  -3   27.34    0.73
  -1   3   3   26.22    0.71
   1  -3   3   26.96    0.72
  -1   3   3   26.50    0.73
   1   3  -3   26.31    0.89
   2   3   3   49.77    1.47
  -2   3  -3   52.01    1.49
  -2  -3   3   50.67    1.33
   2  -3  -3   51.23    1.43
   2  -3  -3   53.30    1.33
   2   3   3   55.26    1.29
  -2   3  -3   52.29    1.31
  -2  -3   3   51.83    1.24
   2   3  -3   52.26    1.46
  -2   3   3   53.01    1.26
  -2   3   3   51.34    1.27
   2  -3   3   51.45    1.28
   2   3  -3   50.31    1.28
   2  -3   3   54.03    1.32
  -2  -3  -3   52.56    1.35
  -2  -3  -3   50.89    1.32
   3  -3  -3   38.76    1.14
   3   3   3   40.20    1.09
  -3  -3   3   38.74    1.05
  -3   3  -3   39.27    1.10
   3   3   3   39.04    1.21
  -3  -3   3   38.16    1.07
   3  -3  -3   35.16    1.16
  -3   3  -3   37.13    1.17
  -3   3   3   38.54    1.03
   3  -3   3   39.20    1.12
  -3  -3  -3   40.25    1.03
   3   3  -3   38.00    1.12
   3   3  -3   37.89    1.06
  -3  -3  -3   39.31    1.13
  -3   3   3   39.17    0.97
   3  -3   3   40.22    1.03
  -4   3  -3   60.15    1.67
  -4  -3   3   59.19    1.57
  -4   3  -3   59.46    1.61
   4  -3  -3   59.65    1.64
   4  -3  -3   58.80    1.76
  -4  -3   3   60.01    1.56
   4   3   3   59.84    1.71
   4   3   3   60.29    1.62
   4  -3   3   60.26    1.53
  -4   3   3   57.49    1.52
   4  -3   3   56.12    1.65
  -4  -3  -3   57.94    1.66
  -4   3   3   60.16    1.44
   4   3  -3   58.69    1.58
  -4  -3  -3   58.26    1.69
  -4  -3  -3   59.83    1.46
   4   3  -3   60.42    1.59
   5  -3  -3   -0.09    0.21
  -5   3  -3   -0.11    0.15
   5   3   3   -0.03    0.17
  -5  -3   3    0.05    0.12
  -5  -3   3   -0.01    0.15
  -5   3  -3    0.20    0.14
   5  -3  -3    0.34    0.15
  -5   3   3    0.22    0.10
   5  -3   3    0.11    0.13
   5   3  -3    0.06    0.11
   5  -3   3    0.17    0.20
  -5  -3  -3    0.13    0.17
   5   3  -3    0.08    0.15
  -5   3   3    0.14    0.14
  -5  -3  -3    0.21    0.17
  -6   3  -3   55.69    1.58
   6  -3  -3   53.94    1.84
  -6  -3   3   52.44    1.52
  -6   3  -3   52.83    1.64
   6  -3  -3   50.54    1.53
  -6  -3   3   52.57    1.62
   6   3   3   51.95    1.67
  -6  -3  -3   53.43    1.68
  -6   3   3   53.95    1.38
   6  -3   3   53.48    1.69
  -6  -3  -3   52.18    1.65
  -6   3   3   54.05    1.54
   6  -3   3   55.51    1.50
   6   3  -3   52.09    1.63
   7  -3  -3    7.46    0.74
  -7  -3   3    7.21    0.49
   7  -3  -3    8.55    0.48
  -7   3  -3    7.85    0.65
   7   3   3    7.23    0.66
  -7  -3   3    7.39    0.63
  -7   3  -3    8.39    0.50
   7  -3   3    7.34    0.66
  -7   3   3    7.65    0.53
   7   3  -3    7.54    0.64
  -7  -3  -3    8.22    0.58
  -7  -3  -3    8.84    0.70
  -8  -3   3   42.27    1.39
  -8   3  -3   42.91    1.57
   8   3   3   43.05    1.62
  -8  -3   3   39.47    1.52
   8  -3  -3   42.73    1.74
   8  -3   3   42.30    1.57
  -8  -3  -3   41.68    1.50
  -8   3   3   41.46    1.44
  -8  -3  -3   41.99    1.55
   8   3  -3   39.04    1.54
   9   3   3   -0.16    0.27
   9   3   3    0.32    0.37
  -9  -3   3    0.41    0.34
  -9   3  -3    0.07    0.29
   9  -3  -3   -0.20    0.36
  -9  -3   3   -0.10    0.22
   9   3  -3   -0.16    0.31
   9  -3   3    0.60    0.38
  -9  -3  -3    0.14    0.29
  -9   3   3   -0.31    0.26
  -9  -3  -3    0.46    0.29
 -10  -3   3   24.27    1.26
  10   3   3   25.28    1.20
  10  -3  -3   24.59    1.38
 -10  -3   3   23.59    1.07
  10   3   3   25.48    1.33
 -10   3  -3   24.84    1.31
  10  -3   3   22.40    1.20
 -10  -3  -3   24.74    1.23
  10   3  -3   23.40    1.29
 -10   3   3   24.57    1.21
 -11  -3   3    0.00    0.42
  11  -3  -3    0.05    0.49
 -11   3  -3    0.46    0.43
  11   3   3    0.68    0.49
 -11  -3  -3    0.55    0.39
 -11   3   3    0.27    0.37
  11  -3   3    1.18    0.51
  11   3  -3    0.61    0.48
  12   3   3   23.32    1.39
  12  -3  -3   25.10    1.46
 -12  -3   3   25.15    1.39
 -12   3   3   24.08    1.35
  12  -3   3   27.10    1.44
 -12  -3  -3   23.87    1.35
   0  -3   4    0.06    0.08
   0   3   4    0.01    0.09
   0   3  -4    0.00    0.12
   0  -3   4   -0.07    0.07
   0  -3  -4    0.14    0.07
   0   3  -4   -0.03    0.03
   0  -3  -4   -0.03    0.08
   1   3   4  222.83    4.80
  -1   3  -4  224.52    5.47
  -1  -3   4  223.40    5.05
  -1  -3   4  226.65    4.88
   1  -3  -4  228.68    4.78
   1  -3  -4  223.41    4.86
   1   3   4  212.16    5.15
  -1   3  -4  220.75    4.86
   1  -3  -4  216.16    5.34
   1  -3   4  220.91    5.02
  -1   3   4  225.48    5.03
  -1  -3  -4  228.30    4.89
   1  -3   4  223.56    4.89
   1   3  -4  225.95    5.45
  -1  -3  -4  221.51    5.33
   2   3   4   11.39    0.41
  -2  -3   4   10.89    0.34
  -2   3  -4   11.06    0.56
   2  -3  -4   10.57    0.44
  -2  -3   4   11.02    0.44
   2  -3  -4   11.17    0.50
   2   3   4   11.31    0.55
  -2   3  -4   11.10    0.46
  -2  -3   4   11.97    0.42
   2   3  -4   11.01    0.52
  -2   3   4   11.97    0.40
  -2  -3  -4   10.98    0.47
   2  -3   4   11.13    0.42
  -2  -3  -4   10.86    0.44
   2  -3   4   10.19    0.41
   2   3  -4   11.27    0.42
  -2   3   4   10.91    0.40
   3  -3  -4  166.94    4.19
  -3  -3   4  177.44    3.97
   3  -3  -4  176.77    4.38
  -3   3  -4  179.35    4.12
  -3  -3   4  180.73    4.14
  -3   3  -4  180.27    4.46
   3   3   4  176.09    4.34
   3   3   4  182.09    4.07
  -3  -3  -4  180.87    4.31
   3  -3   4  178.29    4.10
   3  -3   4  183.89    4.12
  -3   3   4  176.38    4.00
  -3  -3  -4  180.37    4.12
   3   3  -4  177.04    4.04
  -3   3   4  183.48    4.05
   3   3  -4  179.49    4.38
   4  -3  -4    0.79    0.25
   4  -3  -4    1.03    0.21
  -4  -3   4    0.83    0.17
  -4   3  -4    0.96    0.21
  -4   3  -4    0.52    0.19
   4   3   4    0.80    0.20
  -4  -3   4    0.72    0.16
   4   3   4    0.85    0.23
  -4  -3  -4    1.04    0.22
  -4   3   4    0.81    0.16
   4  -3   4    0.55    0.15
   4   3  -4    1.15    0.21
  -4  -3  -4    0.71    0.15
   4   3  -4    0.82    0.17
  -4   3   4    0.93    0.13
   4  -3   4    1.04    0.23
   5  -3  -4  181.86    4.62
  -5   3  -4  185.84    4.61
   5   3   4  191.24    4.43
  -5  -3   4  181.68    4.29
   5  -3  -4  183.94    4.55
  -5   3  -4  183.95    4.41
  -5  -3   4  180.98    4.35
   5   3   4  181.99    4.56
  -5  -3  -4  185.30    4.45
  -5   3   4  189.36    4.22
   5  -3   4  177.55    4.34
   5   3  -4  185.40    4.37
   5   3  -4  188.00    4.49
   5  -3   4  188.76    4.44
  -6  -3   4    1.29    0.27
   6  -3  -4    1.16    0.37
  -6  -3   4    1.17    0.24
  -6   3  -4    1.17    0.29
   6   3   4    1.12    0.29
   6  -3  -4    1.28    0.23
  -6   3  -4    1.15    0.25
   6   3   4    1.35    0.32
   6  -3   4    1.34    0.30
   6   3  -4    0.86    0.19
  -6  -3  -4    0.94    0.29
   6   3  -4    1.16    0.28
   6  -3   4    1.15    0.23
  -6   3   4    1.25    0.25
  -6   3   4    1.01    0.17
  -7   3  -4   77.69    2.31
  -7  -3   4   77.52    2.13
  -7  -3   4   81.45    2.26
   7   3   4   77.58    2.32
   7  -3  -4   76.36    2.49
   7  -3  -4   76.08    2.15
   7   3   4   75.86    2.30
   7  -3   4   74.42    2.26
  -7   3   4   79.04    2.16
   7   3  -4   79.35    2.30
  -7  -3  -4   77.30    2.29
  -8  -3   4    0.10    0.28
   8   3   4    0.30    0.33
  -8  -3   4    0.44    0.22
   8  -3  -4    0.68    0.41
  -8   3  -4    0.47    0.30
   8   3   4    0.26    0.29
  -8   3   4    0.14    0.26
   8   3  -4   -0.05    0.27
   8  -3   4    0.40    0.32
  -8  -3  -4    0.36    0.27
   9   3   4   28.65    1.28
  -9   3  -4   26.99    1.30
   9  -3  -4   26.55    1.40
  -9  -3   4   26.78    1.27
  -9  -3   4   28.27    1.12
   9   3   4   26.74    1.31
  -9   3   4   27.81    1.18
   9   3  -4   26.90    1.32
   9  -3   4   28.62    1.26
  -9  -3  -4   25.05    1.21
  10   3   4   -0.43    0.34
 -10  -3   4    0.33    0.39
 -10   3  -4   -0.03    0.33
  10  -3  -4    0.52    0.48
  10   3   4    0.52    0.40
 -10  -3   4   -0.10    0.26
  10   3  -4    0.18    0.42
 -10  -3  -4    0.05    0.31
 -10   3   4    0.42    0.35
  10  -3   4   -0.15    0.35
  11   3   4   29.12    1.48
 -11   3  -4   29.81    1.50
  11  -3  -4   26.17    1.51
 -11  -3  -4   29.72    1.39
 -11   3   4   28.07    1.37
  11   3  -4   26.49    1.51
  11  -3   4   28.35    1.39
  12  -3  -4    0.65    0.57
  12   3   4    0.02    0.46
 -12   3   4    0.25    0.44
   0   3  -5  110.05    2.33
   0   3  -5  106.66    2.90
   0  -3  -5  101.28    2.79
   0  -3  -5  111.98    2.48
   0  -3   5  107.14    2.58
   0  -3   5  104.64    2.45
   0   3   5  111.20    2.64
  -1  -3   5    2.26    0.22
   1  -3  -5    2.67    0.13
  -1   3  -5    3.06    0.35
  -1   3  -5    3.11    0.19
  -1  -3   5    2.61    0.21
   1  -3  -5    2.91    0.22
   1   3   5    2.45    0.11
  -1  -3   5    2.59    0.11
   1   3   5    2.49    0.28
   1  -3  -5    2.50    0.29
  -1  -3  -5    2.72    0.29
  -1  -3  -5    2.28    0.21
   1  -3   5    2.68    0.20
  -1   3   5    2.41    0.22
   1   3  -5    2.53    0.32
   1  -3   5    3.85    0.24
   2  -3  -5  210.83    4.87
   2   3   5  227.12    4.80
  -2  -3   5  225.79    4.83
   2   3   5  213.51    5.16
  -2   3  -5  220.47    4.88
  -2  -3   5  208.88    4.68
  -2   3  -5  221.70    5.43
   2  -3   5  216.97    4.98
   2   3  -5  221.29    5.38
  -2   3   5  217.37    4.94
  -2   3   5  215.37    4.80
   2  -3   5  216.50    4.84
  -2  -3  -5  220.75    4.87
  -2  -3  -5  213.96    5.31
  -3   3  -5   14.59    0.71
  -3  -3   5   15.14    0.50
  -3  -3   5   14.62    0.58
   3   3   5   17.68    0.75
  -3   3  -5   17.24    0.66
   3  -3  -5   14.20    0.67
   3   3   5   15.75    0.59
   3  -3  -5   15.97    0.68
   3  -3   5   15.79    0.60
   3   3  -5   15.76    0.58
   3   3  -5   15.42    0.68
  -3  -3  -5   15.93    0.63
   3  -3   5   16.24    0.61
  -3   3   5   16.44    0.54
  -3  -3  -5   16.16    0.66
  -3   3   5   14.69    0.54
   4   3   5   95.02    2.59
   4  -3  -5   88.24    2.55
  -4   3  -5   93.99    2.61
  -4  -3   5   95.88    2.39
   4   3   5   92.52    2.40
  -4   3  -5   92.65    2.45
  -4  -3   5   95.24    2.28
   4  -3  -5   95.89    2.55
  -4  -3  -5   98.54    2.48
   4   3  -5   96.51    2.37
  -4   3   5   97.83    2.31
   4  -3   5   95.84    2.42
  -4  -3  -5   94.63    2.49
  -4   3   5   97.97    2.29
   4  -3   5   95.76    2.40
   4   3  -5   91.92    2.52
   5  -3  -5    0.65    0.20
   5  -3  -5    0.71    0.30
  -5   3  -5    0.32    0.19
  -5   3  -5    0.47    0.22
  -5  -3   5    0.38    0.17
  -5  -3   5    0.46    0.16
   5   3   5    0.69    0.26
   5   3   5    0.39    0.22
  -5   3   5    0.59    0.14
  -5  -3  -5    0.35    0.21
   5   3  -5    0.37    0.20
  -5   3   5    0.58    0.19
   5   3  -5    0.47    0.18
   5  -3   5    0.37    0.21
   5  -3   5    0.49    0.19
   6   3   5  180.90    4.43
   6  -3  -5  171.45    4.65
  -6   3  -5  175.16    4.44
  -6  -3   5  174.12    4.28
  -6  -3   5  178.86    4.33
  -6   3  -5  189.03    4.62
   6   3   5  180.34    4.56
   6  -3  -5  178.95    4.52
  -6  -3  -5  185.91    4.47
  -6   3   5  179.41    4.24
   6  -3   5  181.82    4.35
   6   3  -5  182.86    4.45
  -6   3   5  183.38    4.19
   6  -3   5  184.67    4.42
   6   3  -5  177.09    4.38
  -7   3  -5    2.56    0.44
  -7  -3   5    3.24    0.42
   7  -3  -5    3.04    0.37
   7   3   5    2.62    0.45
  -7  -3   5    2.87    0.36
   7   3   5    3.41    0.48
   7  -3  -5    2.83    0.55
   7   3  -5    2.69    0.43
  -7   3   5    3.04    0.37
  -7  -3  -5    3.32    0.46
   7  -3   5    2.08    0.39
   8   3   5   46.67    1.66
  -8  -3   5   45.48    1.47
   8  -3  -5   43.72    1.45
  -8  -3   5   46.64    1.61
   8   3   5   42.78    1.61
   8  -3  -5   45.83    1.86
  -8   3  -5   44.43    1.65
   8  -3   5   41.99    1.56
  -8  -3  -5   46.49    1.63
   8   3  -5   43.39    1.63
  -8   3   5   44.46    1.50
   9  -3  -5   -0.19    0.37
  -9  -3   5   -0.02    0.30
  -9   3  -5   -0.06    0.31
   9   3   5   -0.33    0.31
   9   3   5   -0.09    0.32
  -9  -3   5   -0.01    0.22
  -9   3   5   -0.27    0.27
   9  -3   5    0.18    0.32
  -9  -3  -5   -0.05    0.26
   9   3  -5   -0.29    0.34
  10  -3  -5   84.66    2.88
  10   3   5   86.76    2.67
 -10  -3   5   87.79    2.51
  10   3   5   81.43    2.65
 -10   3  -5   84.90    2.71
  10  -3   5   83.18    2.61
  10   3  -5   83.60    2.78
 -10   3   5   83.02    2.58
 -10  -3  -5   77.43    2.57
  11   3   5    0.66    0.47
  11  -3  -5    0.30    0.54
 -11   3  -5    0.40    0.43
 -11  -3  -5    0.38    0.38
  11   3  -5    0.60    0.48
 -11   3   5   -0.10    0.34
  11  -3   5    0.50    0.43
   0  -3  -6    0.00    0.10
   0  -3   6   -0.10    0.09
   0   3  -6   -0.03    0.16
   0  -3  -6    0.19    0.16
   0  -3   6   -0.06    0.10
   0   3   6    0.11    0.12
   0   3  -6   -0.04    0.06
   1  -3  -6  263.17    5.69
  -1  -3   6  264.94    5.53
   1  -3  -6  262.27    5.55
  -1   3  -6  255.97    6.43
  -1  -3   6  258.53    5.93
   1   3   6  256.33    6.03
  -1   3  -6  265.55    5.62
  -1  -3   6  262.27    5.69
   1  -3   6  252.81    5.92
   1   3  -6  258.38    6.42
   1  -3   6  259.09    5.70
  -1  -3  -6  246.52    6.34
  -1   3   6  259.48    5.92
  -1  -3  -6  266.18    5.73
   2  -3  -6    3.26    0.28
  -2  -3   6    2.78    0.24
   2   3   6    2.60    0.19
  -2   3  -6    2.88    0.26
   2   3   6    3.09    0.35
  -2  -3   6    2.67    0.27
  -2  -3   6    3.32    0.17
   2  -3  -6    3.41    0.37
  -2   3  -6    3.93    0.42
  -2   3   6    2.68    0.26
   2  -3   6    2.93    0.28
  -2   3   6    3.43    0.24
   2   3  -6    3.15    0.38
   2  -3   6    2.75    0.25
  -2  -3  -6    2.63    0.26
  -2  -3  -6    2.35    0.33
  -3   3  -6  217.77    5.43
  -3   3  -6  220.94    4.94
   3   3   6  214.46    5.21
  -3  -3   6  215.79    5.02
   3  -3  -6  197.95    4.99
   3  -3  -6  211.15    5.34
   3   3   6  220.54    4.83
  -3  -3   6  214.62    4.72
  -3   3   6  218.97    4.95
  -3  -3  -6  209.22    5.36
   3   3  -6  218.13    4.87
  -3  -3  -6  225.86    4.95
   3   3  -6  211.74    5.36
  -3   3   6  216.45    4.82
   3  -3   6  222.51    5.05
   3  -3   6  216.15    4.88
  -4   3  -6    1.67    0.27
   4   3   6    1.66    0.31
   4  -3  -6    1.69    0.29
  -4  -3   6    1.71    0.20
  -4  -3   6    1.48    0.23
  -4   3  -6    1.25    0.27
   4   3   6    1.78    0.26
   4  -3  -6    1.58    0.33
  -4  -3  -6    2.46    0.31
   4  -3   6    1.89    0.28
  -4  -3  -6    1.91    0.30
  -4   3   6    1.93    0.22
   4   3  -6    1.48    0.24
   4  -3   6    1.43    0.25
   4   3  -6    1.66    0.28
  -4   3   6    1.05    0.19
  -5   3  -6  141.23    3.67
  -5  -3   6  144.13    3.41
   5   3   6  138.72    3.38
   5   3   6  138.17    3.61
   5  -3  -6  134.71    3.65
   5  -3  -6  135.79    3.60
  -5   3  -6  140.30    3.47
  -5  -3   6  138.75    3.29
   5   3  -6  135.34    3.57
  -5   3   6  140.93    3.31
  -5  -3  -6  136.58    3.50
   5  -3   6  135.94    3.44
  -5   3   6  140.51    3.29
   5  -3   6  133.80    3.42
   5   3  -6  139.13    3.40
   6   3   6    2.15    0.36
   6   3   6    3.44    0.46
  -6  -3   6    3.58    0.37
  -6   3  -6    3.53    0.43
  -6   3  -6    3.53    0.42
   6  -3  -6    4.22    0.59
  -6  -3   6    3.51    0.38
   6  -3  -6    3.66    0.40
  -6   3   6    4.07    0.39
  -6  -3  -6    3.10    0.43
  -6   3   6    3.42    0.31
   6  -3   6    3.70    0.44
   6  -3   6    3.16    0.38
   6   3  -6    3.25    0.43
   6   3  -6    3.91    0.40
  -7  -3   6  130.30    3.33
   7   3   6  132.31    3.53
  -7   3  -6  131.37    3.45
   7  -3  -6  130.38    3.45
   7  -3  -6  128.40    3.73
  -7  -3   6  128.90    3.31
   7   3   6  131.80    3.40
   7  -3   6  129.74    3.40
  -7   3   6  126.41    3.25
  -7  -3  -6  131.83    3.47
   7   3  -6  129.70    3.45
  -8   3  -6   -0.04    0.26
   8   3   6    0.35    0.33
   8  -3  -6    0.11    0.23
  -8  -3   6    0.04    0.22
   8   3   6    0.09    0.30
   8  -3  -6    0.03    0.38
   8   3  -6    0.35    0.30
  -8   3   6   -0.03    0.23
   8  -3   6    0.21    0.31
  -8  -3  -6   -0.23    0.23
   9   3   6   81.89    2.54
  -9  -3   6   81.49    2.41
  -9   3  -6   80.61    2.57
   9  -3  -6   89.21    2.91
   9   3   6   85.66    2.60
  -9  -3  -6   81.01    2.54
   9   3  -6   83.87    2.67
  -9   3   6   82.43    2.45
   9  -3   6   87.87    2.56
 -10   3  -6   -0.15    0.34
  10   3   6    0.65    0.43
  10  -3  -6    0.33    0.51
 -10  -3   6   -0.22    0.25
  10   3   6    0.49    0.41
 -10  -3  -6    0.81    0.36
  10   3  -6    0.42    0.43
 -10   3   6    0.39    0.35
  10  -3   6    0.14    0.36
  11   3   6   67.39    2.33
 -11   3  -6   66.03    2.37
  11  -3  -6   73.36    2.66
  11   3  -6   70.56    2.58
 -11   3   6   66.74    2.31
  11  -3   6   67.34    2.32
 -11  -3  -6   64.00    2.29
   0  -3   7  198.02    4.69
   0   3  -7  201.68    4.32
   0  -3  -7  203.25    4.49
   0  -3  -7  195.75    5.08
   0  -3   7  202.58    4.46
   0   3  -7  194.95    5.16
   0   3   7  204.99    4.75
   1  -3  -7    1.02    0.25
   1   3   7    0.72    0.21
  -1   3  -7    1.26    0.15
  -1   3  -7    0.88    0.27
  -1  -3   7    1.04    0.17
  -1  -3   7    1.14    0.22
   1  -3  -7    0.99    0.17
  -1  -3   7    1.23    0.11
   1  -3   7    0.89    0.16
   1  -3   7    1.14    0.21
  -1  -3  -7    0.88    0.18
   1   3  -7    1.25    0.31
  -1  -3  -7    1.06    0.26
  -1   3   7    0.96    0.20
   2  -3  -7  163.13    4.22
  -2   3  -7  164.67    4.30
   2  -3  -7  154.03    3.72
   2   3   7  163.27    3.56
  -2  -3   7  165.48    3.55
  -2   3  -7  163.45    3.71
  -2  -3   7  164.59    3.71
  -2  -3  -7  158.18    3.76
   2   3  -7  166.23    3.71
  -2   3   7  164.38    3.86
   2  -3   7  163.24    3.91
  -2   3   7  163.77    3.71
   2   3  -7  167.92    4.30
  -2  -3  -7  161.28    4.27
   2  -3   7  160.79    3.71
  -3  -3   7    1.29    0.15
  -3   3  -7    1.07    0.22
   3  -3  -7    0.97    0.24
   3   3   7    0.63    0.15
  -3  -3   7    0.86    0.20
  -3   3  -7    0.73    0.25
   3  -3  -7    0.65    0.22
   3   3   7    0.93    0.26
  -3   3   7    1.07    0.19
   3  -3   7    0.52    0.17
  -3   3   7    1.17    0.20
   3   3  -7    1.12    0.26
   3   3  -7    0.89    0.18
   3  -3   7    1.03    0.23
  -3  -3  -7    0.94    0.21
  -3  -3  -7    1.15    0.29
  -4   3  -7  166.24    3.86
  -4  -3   7  165.04    3.89
  -4   3  -7  167.37    4.23
   4  -3  -7  155.64    4.13
   4   3   7  160.39    4.09
   4   3   7  166.65    3.73
   4  -3  -7  148.60    3.95
  -4   3   7  163.22    3.79
   4  -3   7  156.49    3.79
  -4  -3  -7  145.85    4.14
   4   3  -7  160.16    3.78
   4  -3   7  160.61    3.93
  -4  -3  -7  163.33    3.88
   4   3  -7  156.97    4.15
  -4   3   7  158.13    3.70
   5  -3  -7    0.07    0.19
   5  -3  -7    0.24    0.27
   5   3   7    0.40    0.26
  -5   3  -7    0.12    0.22
  -5  -3   7    0.18    0.17
  -5   3  -7    0.09    0.20
   5   3   7    0.02    0.19
   5   3  -7    0.02    0.18
   5   3  -7    0.10    0.18
   5  -3   7    0.10    0.19
   5  -3   7    0.15    0.21
  -5  -3  -7   -0.01    0.20
  -5   3   7   -0.15    0.12
  -5   3   7    0.03    0.14
   6   3   7  100.55    2.84
  -6   3  -7   98.51    2.82
  -6   3  -7  102.45    2.73
   6   3   7  100.40    2.62
   6  -3  -7  100.71    2.81
  -6  -3   7  101.24    2.64
   6  -3  -7   99.65    2.97
   6   3  -7  100.38    2.71
  -6  -3  -7   95.72    2.75
   6  -3   7   99.79    2.69
  -6   3   7   99.17    2.55
  -6   3   7  102.10    2.52
   6  -3   7   98.39    2.67
   6   3  -7   99.09    2.75
   7  -3  -7    1.89    0.50
   7   3   7    0.86    0.34
  -7  -3   7    0.92    0.26
   7  -3  -7    1.56    0.34
   7   3   7    1.99    0.37
  -7   3  -7    1.63    0.35
  -7   3   7    1.52    0.31
  -7  -3  -7    0.79    0.33
   7   3  -7    1.45    0.37
   7  -3   7    1.98    0.39
   8   3   7  138.80    3.62
   8  -3  -7  146.00    4.09
  -8   3  -7  137.40    3.69
   8  -3  -7  139.04    3.72
  -8  -3   7  141.76    3.60
   8   3   7  136.66    3.77
   8   3  -7  136.16    3.76
  -8  -3  -7  134.93    3.71
  -8   3   7  136.98    3.55
   8  -3   7  141.18    3.67
  -9   3  -7    1.03    0.39
   9   3   7    1.11    0.41
   9   3   7    1.08    0.40
   9  -3  -7    0.86    0.54
  -9  -3   7    1.03    0.32
  -9  -3  -7    1.14    0.38
  -9   3   7    1.19    0.39
   9  -3   7    1.85    0.45
   9   3  -7    0.46    0.40
  10   3   7   67.86    2.29
  10   3   7   68.30    2.25
 -10   3  -7   69.20    2.33
  10  -3  -7   74.81    2.66
 -10  -3   7   68.61    2.17
 -10   3   7   67.22    2.22
  10   3  -7   68.86    2.45
 -10  -3  -7   65.38    2.27
  10  -3   7   67.97    2.24
 -11   3  -7    0.74    0.46
  11  -3  -7   -0.16    0.48
 -11  -3  -7    0.32    0.39
  11   3  -7    0.25    0.52
  11  -3   7    0.09    0.41
 -11   3   7   -0.12    0.38
   0   3  -8    0.13    0.22
   0   3  -8   -0.03    0.08
   0  -3   8   -0.08    0.12
   0  -3   8   -0.06    0.14
   0   3   8    0.06    0.16
   0  -3  -8   -0.01    0.19
   0  -3  -8   -0.07    0.11
  -1   3  -8  215.24    5.62
  -1  -3   8  218.25    4.83
  -1   3  -8  220.29    4.75
  -1  -3   8  213.80    5.10
   1  -3  -8  216.43    4.85
   1   3   8  212.61    5.19
   1  -3  -8  217.69    5.54
   1   3  -8  220.26    5.61
  -1   3   8  216.51    5.10
   1  -3   8  212.61    4.83
   1  -3   8  214.26    5.11
  -1  -3  -8  214.82    4.88
  -1  -3  -8  224.89    5.61
  -2  -3   8   18.82    0.66
   2   3   8   18.96    0.85
  -2  -3   8   19.15    0.77
  -2   3  -8   19.60    0.96
   2  -3  -8   19.25    0.91
  -2   3  -8   19.77    0.66
   2  -3   8   20.29    0.67
   2   3  -8   19.70    0.95
   2  -3   8   20.10    0.80
  -2   3   8   20.06    0.75
   2   3  -8   19.27    0.67
  -2  -3  -8   19.93    0.96
  -2   3   8   19.49    0.68
  -2  -3  -8   18.72    0.71
   3  -3  -8  153.93    4.10
  -3   3  -8  156.95    4.18
  -3  -3   8  156.11    3.79
   3   3   8  153.98    3.98
  -3   3  -8  157.15    3.65
   3  -3   8  156.63    3.84
   3   3  -8  157.22    4.15
   3  -3   8  157.51    3.62
  -3   3   8  152.37    3.58
  -3  -3  -8  162.16    3.71
  -3  -3  -8  143.86    4.15
  -3   3   8  152.40    3.72
   3   3  -8  151.69    3.61
   4  -3  -8    8.60    0.59
   4   3   8    7.36    0.64
  -4   3  -8    7.77    0.51
  -4   3  -8    9.11    0.64
  -4  -3   8    8.35    0.50
   4  -3   8    8.98    0.58
   4  -3   8    8.52    0.50
  -4  -3  -8    8.37    0.54
   4   3  -8    8.87    0.50
  -4   3   8    9.12    0.47
  -4  -3  -8    7.66    0.67
  -4   3   8    8.85    0.45
   4   3  -8    7.50    0.58
  -5   3  -8  122.40    3.38
   5   3   8  120.80    3.31
  -5  -3   8  125.68    3.11
   5  -3  -8  122.20    3.34
  -5   3  -8  124.43    3.11
  -5   3   8  121.38    2.97
  -5  -3  -8  118.90    3.15
   5   3  -8  119.98    3.08
  -5   3   8  123.78    3.01
   5   3  -8  121.98    3.33
   5  -3   8  118.79    3.06
   5  -3   8  114.72    3.17
   6   3   8    1.87    0.40
   6  -3  -8    1.13    0.31
  -6  -3   8    1.21    0.28
  -6   3  -8    1.59    0.35
  -6   3  -8    1.47    0.33
  -6   3   8    1.32    0.28
   6  -3   8    0.85    0.30
   6   3  -8    1.07    0.32
  -6   3   8    0.94    0.23
   6  -3   8    1.23    0.32
   6   3  -8    0.66    0.27
  -6  -3  -8    1.01    0.32
   7   3   8   86.68    2.60
  -7   3  -8   87.96    2.49
  -7  -3   8   84.06    2.38
   7  -3  -8   88.51    2.55
  -7  -3  -8   86.17    2.54
   7  -3   8   81.86    2.42
   7   3  -8   84.10    2.51
  -7   3   8   85.58    2.34
   8   3   8    3.28    0.52
  -8   3  -8    3.04    0.48
  -8  -3   8    1.98    0.37
   8  -3  -8    2.61    0.43
   8   3  -8    3.67    0.57
  -8  -3  -8    3.95    0.55
   8  -3   8    3.61    0.52
  -8   3   8    2.86    0.45
   9   3   8  101.07    3.01
  -9  -3   8  100.79    2.83
  -9   3  -8  101.78    2.95
   9  -3   8  101.63    2.88
  -9   3   8   98.53    2.82
  -9  -3  -8   98.38    2.95
   9   3  -8  100.15    3.08
 -10   3  -8   -0.01    0.35
  10   3   8   -0.30    0.37
 -10  -3   8    0.04    0.31
  10   3  -8   -0.46    0.41
 -10  -3  -8    0.17    0.33
 -10   3   8   -0.14    0.32
  10  -3   8    0.05    0.36
   0  -3   9  256.24    6.01
   0  -3   9  257.17    5.66
   0   3  -9  244.95    6.56
   0  -3  -9  259.58    6.56
   0  -3  -9  254.83    5.70
   0   3   9  258.97    6.05
  -1   3  -9   13.01    0.82
  -1  -3   9   12.93    0.52
   1  -3  -9   14.07    0.56
   1   3   9   12.70    0.69
  -1  -3   9   13.27    0.65
   1  -3   9   13.82    0.53
  -1  -3  -9   13.82    0.85
  -1  -3  -9   13.73    0.57
   1   3  -9   11.56    0.79
  -1   3   9   13.64    0.66
   1  -3   9   13.37    0.65
  -2   3  -9  161.61    4.41
  -2  -3   9  159.38    3.96
  -2   3  -9  164.21    3.69
   2  -3  -9  167.52    4.36
   2   3   9  159.14    4.11
   2  -3   9  159.45    3.71
  -2  -3  -9  158.93    4.42
  -2   3   9  160.21    3.93
  -2  -3  -9  162.10    3.79
  -2   3   9  164.26    3.74
   2  -3   9  158.55    4.00
   2   3  -9  163.29    4.42
   2   3  -9  158.72    3.72
   3   3   9   12.34    0.74
  -3   3  -9   12.13    0.78
   3  -3  -9   14.35    0.81
  -3  -3   9   12.79    0.65
  -3   3  -9   13.34    0.59
   3  -3   9   13.25    0.71
  -3   3   9   14.13    0.64
  -3  -3  -9   13.56    0.85
   3   3  -9   12.55    0.78
  -3  -3  -9   13.07    0.64
   3  -3   9   13.61    0.59
   3   3  -9   13.31    0.59
  -3   3   9   13.05    0.57
  -4   3  -9  222.56    5.20
  -4  -3   9  225.53    5.36
   4  -3  -9  226.89    5.76
  -4   3  -9  230.60    5.82
   4   3   9  218.83    5.56
  -4  -3  -9  226.06    5.27
   4  -3   9  226.11    5.17
  -4  -3  -9  219.94    5.83
   4   3  -9  219.62    5.77
  -4   3   9  221.35    5.10
   4  -3   9  222.51    5.45
   4   3  -9  223.40    5.18
  -4   3   9  225.05    5.28
   5   3   9    1.17    0.36
  -5   3  -9    1.60    0.32
  -5   3  -9    1.61    0.38
  -5  -3   9    1.69    0.31
   5  -3  -9    1.26    0.33
  -5  -3  -9    1.18    0.33
   5   3  -9    1.52    0.32
  -5   3   9    1.56    0.29
   5  -3   9    1.53    0.31
  -5   3   9    1.72    0.28
   5  -3   9    0.78    0.31
   5   3  -9    1.67    0.36
  -6   3  -9  111.17    2.90
   6   3   9  105.99    3.08
   6  -3  -9  110.30    3.10
  -6  -3   9  102.36    2.84
  -6   3  -9  108.38    3.12
  -6   3   9  109.66    2.77
  -6   3   9  105.10    2.75
   6  -3   9  105.84    2.83
  -6  -3  -9  104.54    2.94
   6   3  -9  108.37    3.07
   6   3  -9  111.85    2.93
   6  -3   9  104.82    2.96
   7  -3  -9    7.47    0.67
   7   3   9    8.30    0.76
  -7   3  -9    8.35    0.70
  -7  -3   9    7.94    0.59
   7   3  -9    8.16    0.73
  -7  -3  -9    8.31    0.72
   7  -3   9    7.94    0.66
  -7   3   9    8.23    0.59
  -8   3  -9   99.93    2.85
  -8  -3   9   99.14    2.78
   8   3   9   98.85    2.97
   8  -3  -9  100.82    2.95
   8  -3   9  104.78    2.85
  -8  -3  -9   97.91    2.90
  -8   3   9  101.31    2.75
   8   3  -9   99.58    2.99
  -9   3  -9    0.56    0.37
  -9  -3   9    0.69    0.32
   9   3   9    0.05    0.34
   9   3  -9    0.84    0.44
  -9   3   9    0.39    0.33
   9  -3   9    0.53    0.39
  -9  -3  -9    0.87    0.39
  10   3   9   50.80    1.94
 -10   3  -9   52.98    1.92
 -10  -3   9   52.80    1.82
  10  -3   9   52.01    1.85
 -10  -3  -9   46.30    1.85
  10   3  -9   54.30    2.15
   0   3  10   -0.20    0.18
   0  -3  10    0.07    0.14
   0  -3 -10   -0.08    0.22
   0  -3 -10   -0.04    0.14
   0   3 -10    0.10    0.26
   0  -3  10   -0.09    0.16
  -1   3 -10  121.28    3.58
  -1  -3  10  123.15    2.87
   1  -3 -10  123.04    3.55
  -1  -3  10  122.95    3.15
   1  -3 -10  121.97    2.90
   1   3  10  118.31    3.22
   1  -3  10  119.42    3.16
  -1  -3 -10  125.57    3.61
  -1   3  10  117.60    3.12
   1   3 -10  122.61    3.60
  -1  -3 -10  120.90    2.93
   1  -3  10  120.28    2.86
  -2  -3  10    0.69    0.25
  -2   3 -10    0.84    0.33
   2  -3 -10    0.94    0.32
   2   3  10    0.74    0.28
  -2  -3 -10    0.84    0.21
  -2   3  10    0.63    0.23
   2   3 -10    1.11    0.35
  -2   3  10    0.43    0.19
  -2  -3 -10    0.56    0.31
   2   3 -10    0.87    0.21
   2  -3  10    0.71    0.27
   2  -3  10    0.96    0.22
  -3   3 -10  148.92    4.11
   3  -3 -10  149.12    4.05
   3   3  10  135.93    3.82
  -3  -3  10  146.10    3.67
   3   3 -10  148.31    4.10
  -3  -3 -10  134.04    4.09
  -3   3  10  141.54    3.61
   3   3 -10  147.43    3.47
  -3   3  10  148.20    3.45
   3  -3  10  145.79    3.44
  -3  -3 -10  147.93    3.54
   3  -3  10  144.96    3.76
   4  -3 -10    2.24    0.41
  -4  -3  10    2.78    0.38
   4   3  10    2.13    0.41
  -4   3 -10    2.64    0.46
  -4   3 -10    2.76    0.35
  -4  -3 -10    2.48    0.36
  -4   3  10    2.01    0.32
   4  -3  10    2.71    0.35
   4   3 -10    2.27    0.44
   4  -3  10    3.16    0.45
  -4  -3 -10    2.01    0.45
  -4   3  10    2.46    0.32
   4   3 -10    2.47    0.35
   5   3  10   83.46    2.57
  -5  -3  10   86.24    2.40
  -5   3 -10   86.80    2.36
   5  -3 -10   82.69    2.59
  -5   3 -10   86.43    2.64
   5  -3  10   86.81    2.30
  -5   3  10   89.19    2.32
   5   3 -10   84.95    2.62
  -5   3  10   84.35    2.24
   5   3 -10   84.72    2.35
  -5  -3 -10   77.55    2.36
   5  -3  10   81.69    2.48
  -6   3 -10   -0.11    0.26
   6  -3 -10   -0.07    0.26
  -6  -3  10    0.23    0.24
   6   3  10    0.02    0.32
  -6   3 -10   -0.16    0.23
   6  -3  10   -0.41    0.26
   6   3 -10    0.37    0.30
   6  -3  10   -0.04    0.26
  -6  -3 -10    0.02    0.27
  -6   3  10    0.07    0.21
  -6   3  10    0.62    0.27
   6   3 -10    0.05    0.27
   7   3  10   82.93    2.64
   7  -3 -10   83.50    2.63
  -7   3 -10   88.27    2.50
  -7  -3  10   85.07    2.45
   7   3 -10   87.76    2.59
   7  -3  10   86.95    2.45
  -7   3  10   85.69    2.38
  -7  -3 -10   83.33    2.55
  -8   3 -10    1.90    0.43
   8  -3 -10    2.21    0.44
   8   3  10    1.23    0.42
  -8  -3  10    1.53    0.37
  -8  -3 -10    2.50    0.50
  -8   3  10    1.57    0.39
   8  -3  10    0.74    0.38
   8   3 -10    1.42    0.47
  -9  -3  10   51.96    1.79
   9   3  10   53.92    1.97
  -9   3 -10   54.22    1.87
   9   3 -10   52.10    2.05
  -9  -3 -10   51.05    1.88
   0  -3  11   42.22    1.44
   0  -3 -11   44.16    1.77
   0  -3 -11   41.53    1.25
   0   3 -11   39.87    1.73
   0   3  11   43.22    1.48
  -1  -3  11    9.23    0.60
   1   3  11    9.97    0.66
   1  -3 -11    9.33    0.49
   1  -3 -11    9.04    0.82
  -1   3 -11   10.68    0.94
   1  -3  11    8.54    0.60
  -1  -3 -11    9.07    0.86
  -1  -3 -11    9.06    0.51
  -1   3  11    8.74    0.60
   1   3 -11   10.27    0.93
  -2   3 -11  131.66    3.82
   2  -3 -11  132.70    3.78
  -2  -3  11  123.38    3.34
   2   3  11  128.28    3.50
  -2   3  11  129.07    3.10
  -2   3  11  128.10    3.33
  -2  -3 -11  122.11    3.81
  -2  -3 -11  124.39    3.15
   2  -3  11  131.20    3.45
   2   3 -11  133.90    3.85
   3   3  11   17.08    0.93
  -3  -3  11   15.79    0.79
   3  -3 -11   16.58    0.96
  -3   3 -11   17.24    1.02
  -3   3  11   17.78    0.81
  -3   3  11   16.05    0.69
  -3  -3 -11   15.18    0.73
   3   3 -11   18.16    1.04
   3  -3  11   16.08    0.88
  -3  -3 -11   16.07    1.02
  -4   3 -11   53.38    1.94
  -4  -3  11   50.35    1.65
   4   3  11   50.99    1.83
   4  -3 -11   51.79    1.88
  -4   3  11   52.55    1.52
  -4  -3 -11   54.98    2.01
   4   3 -11   51.46    1.93
   4  -3  11   48.52    1.74
  -4   3  11   50.07    1.61
  -4  -3 -11   50.31    1.62
   5   3  11   -0.37    0.28
  -5  -3  11   -0.37    0.20
  -5   3 -11   -0.15    0.29
   5  -3 -11   -0.06    0.26
   5   3 -11   -0.06    0.26
  -5  -3 -11    0.17    0.26
  -5   3  11    0.12    0.22
  -5   3  11   -0.03    0.21
   5  -3  11    0.13    0.27
   6  -3 -11   70.28    2.33
  -6   3 -11   72.24    2.38
  -6  -3  11   71.81    2.14
   6   3  11   69.11    2.31
   6  -3  11   69.44    2.24
   6   3 -11   66.23    2.30
  -6   3  11   75.22    2.08
  -6  -3 -11   66.98    2.16
  -7  -3  11    4.54    0.52
  -7   3 -11    5.67    0.60
   7   3  11    4.61    0.64
   7  -3 -11    4.96    0.61
  -7  -3 -11    4.54    0.58
  -8  -3  11   35.65    1.41
   8   3  11   39.60    1.62
   8  -3 -11   37.80    1.56
  -8   3 -11   36.31    1.45
  -8  -3 -11   37.81    1.53
   9   3  11    2.79    0.58
  -9  -3  11    3.17    0.50
  -9   3 -11    3.04    0.52
  -9  -3 -11    2.13    0.49
   0  -3 -12    0.14    0.20
   0  -3 -12    0.09    0.30
   0   3 -12    0.13    0.29
   0   3  12    0.20    0.24
   0  -3  12    0.18    0.23
   1  -3 -12   49.11    1.99
  -1  -3  12   52.46    1.71
   1  -3 -12   50.34    1.48
   1   3  12   52.94    1.79
  -1   3 -12   52.39    2.05
   1   3 -12   53.98    2.09
  -1  -3 -12   52.82    1.52
  -1  -3 -12   50.31    2.05
  -1   3  12   51.88    1.70
   1  -3  12   51.42    1.75
   2   3  12   17.37    0.96
  -2   3 -12   17.11    1.09
   2  -3 -12   15.51    1.01
  -2  -3  12   16.67    0.84
   2  -3  12   16.46    0.91
  -2   3  12   15.52    0.69
   2   3 -12   15.52    1.03
  -2   3  12   15.22    0.80
  -2  -3 -12   15.58    0.73
  -2  -3 -12   15.91    1.07
   3   3  12   51.75    1.86
  -3  -3  12   50.16    1.69
   3  -3 -12   52.99    1.99
  -3   3 -12   50.98    1.99
  -3   3  12   52.10    1.51
   3  -3  12   50.67    1.80
   3   3 -12   52.79    2.05
  -3   3  12   51.38    1.67
  -3  -3 -12   51.70    2.05
  -3  -3 -12   52.07    1.60
   4  -3 -12    1.65    0.44
   4   3  12    2.11    0.47
  -4   3 -12    0.84    0.38
  -4  -3  12    1.50    0.36
  -4  -3 -12    1.27    0.48
   4   3 -12    1.64    0.46
  -4   3  12    0.93    0.31
   4  -3  12    1.57    0.39
  -4  -3 -12    1.50    0.33
   5   3  12   48.53    1.83
  -5   3 -12   49.48    1.90
   5  -3 -12   47.57    1.85
  -5  -3  12   47.50    1.65
   5   3 -12   49.61    1.91
  -5  -3 -12   46.10    1.64
  -5   3  12   50.93    1.61
   5  -3  12   46.32    1.76
   6   3  12    2.61    0.54
   6  -3 -12    2.51    0.50
  -6  -3  12    2.36    0.43
  -6   3  12    2.62    0.42
   6   3 -12    1.72    0.45
  -6  -3 -12    2.48    0.47
   6  -3  12    2.69    0.50
   7   3  12   44.67    1.79
   7  -3 -12   43.56    1.77
  -7  -3  12   44.25    1.62
  -7  -3 -12   46.79    1.71
   7   3 -12   44.67    1.76
  -8  -3  12    4.87    0.61
   8   3  12    4.52    0.68
   8  -3 -12    5.72    0.72
  -8  -3 -12    5.27    0.65
   0  -3 -13   52.69    1.54
   0  -3 -13   54.70    2.17
   0  -3  13   50.48    1.78
   0   3  13   52.26    1.81
   0   3 -13   52.04    2.14
   1  -3 -13    0.37    0.38
  -1  -3  13   -0.09    0.25
   1   3  13    0.58    0.34
  -1   3 -13   -0.03    0.35
   1  -3  13    0.17    0.29
  -1   3  13    0.36    0.24
  -1  -3 -13    0.25    0.40
  -1  -3 -13    0.16    0.22
  -1   3  13    0.73    0.32
   1   3 -13   -0.06    0.30
   2   3  13   32.25    1.39
   2  -3 -13   30.46    1.52
  -2   3 -13   30.62    1.55
  -2  -3  13   31.38    1.28
   2  -3  13   32.54    1.38
  -2   3  13   30.94    1.25
  -2  -3 -13   33.82    1.14
  -2  -3 -13   32.07    1.60
   2   3 -13   32.35    1.61
   3   3  13    3.16    0.54
  -3   3 -13    2.75    0.55
   3  -3 -13    2.90    0.56
  -3  -3  13    2.20    0.42
   3   3 -13    2.37    0.55
  -3  -3 -13    2.76    0.40
  -3  -3 -13    1.92    0.53
  -3   3  13    2.03    0.39
   3  -3  13    2.35    0.46
   4  -3 -13   29.68    1.43
  -4  -3  13   28.36    1.21
   4   3  13   28.65    1.36
  -4   3 -13   28.30    1.44
   4  -3  13   26.66    1.31
  -4   3  13   27.89    1.18
  -4  -3 -13   30.72    1.51
   4   3 -13   29.93    1.48
  -4  -3 -13   31.08    1.19
   5  -3 -13   -0.25    0.31
   5   3  13    0.51    0.38
  -5  -3  13    0.65    0.33
  -5   3 -13    0.33    0.39
   5  -3  13   -0.11    0.38
  -5  -3 -13    0.35    0.28
  -5   3  13    0.25    0.29
   5   3 -13    0.35    0.41
   6   3  13   20.57    1.17
  -6  -3  13   18.94    1.00
   6  -3 -13   19.05    1.13
   6   3 -13   20.15    1.15
   6  -3  13   18.91    1.11
  -6   3  13   19.79    0.97
  -6  -3 -13   18.77    1.03
   7  -3 -13    1.45    0.50
  -7  -3  13    1.14    0.38
   7   3  13    1.60    0.52
  -7  -3 -13    0.36    0.38
   7   3 -13    1.08    0.47
   0   3 -14    0.04    0.38
   0   3  14   -0.58    0.27
   0  -3  14    0.03    0.30
   0  -3 -14    0.35    0.39
  -1  -3  14    9.57    0.73
  -1   3 -14    9.15    0.99
   1   3  14   10.00    0.84
   1  -3 -14   10.32    1.04
   1   3 -14   10.12    1.03
  -1   3  14    7.82    0.73
  -1  -3 -14    9.68    1.02
   1  -3  14    9.94    0.86
   2  -3 -14    4.25    0.71
   2   3  14    4.18    0.59
  -2  -3  14    4.68    0.57
  -2   3 -14    5.08    0.73
   2   3 -14    3.69    0.71
  -2   3  14    4.60    0.55
  -2  -3 -14    4.49    0.48
   2  -3  14    4.14    0.58
  -2  -3 -14    3.67    0.70
  -3  -3  14   11.64    0.81
  -3   3 -14   13.27    1.03
   3   3  14   11.86    0.99
   3  -3 -14   10.24    1.00
  -3  -3 -14   10.77    0.69
   3   3 -14    9.92    1.03
  -3   3  14   11.35    0.77
  -3  -3 -14   12.03    1.12
   3  -3  14   12.62    0.88
   4  -3 -14    2.89    0.61
   4   3  14    2.54    0.54
  -4   3 -14    3.35    0.62
  -4  -3  14    3.22    0.49
   4  -3  14    2.82    0.56
  -4  -3 -14    3.46    0.49
   4   3 -14    2.99    0.61
  -4   3  14    3.50    0.49
  -5   3 -14   12.62    1.08
  -5  -3  14   11.13    0.80
   5  -3 -14   10.93    1.02
   5   3  14   11.61    1.01
  -5  -3 -14   11.48    0.79
   5  -3  14   11.79    0.98
   5   3 -14    9.85    0.98
  -5   3  14   11.82    0.76
  -6  -3  14    1.06    0.41
   6  -3 -14    1.29    0.49
   6   3  14    0.79    0.47
   6  -3  14    0.83    0.48
  -6  -3 -14    0.63    0.38
   6   3 -14    1.42    0.49
  -6   3  14    1.16    0.41
   0  -3  15   10.04    0.86
   0   3  15    8.77    0.80
   0   3 -15    7.98    0.98
   0  -3 -15    9.65    1.05
   1   3  15    0.17    0.37
  -1  -3  15   -0.40    0.30
  -1   3 -15   -0.40    0.35
   1  -3 -15    0.09    0.43
  -1  -3 -15   -0.14    0.38
   1   3 -15   -0.30    0.42
   1  -3  15   -0.01    0.35
  -1   3  15    0.15    0.36
  -2   3 -15    2.64    0.61
  -2  -3  15    1.62    0.43
   2   3  15    1.89    0.48
   2  -3 -15    2.58    0.61
   2  -3  15    0.81    0.43
   2   3 -15    1.46    0.53
  -2  -3 -15    1.63    0.57
  -2   3  15    1.54    0.43
   3   3  15    1.12    0.45
   3  -3 -15    1.25    0.53
  -3  -3  15    0.86    0.40
  -3   3 -15    1.86    0.56
  -3  -3 -15    1.30    0.55
   3   3 -15    1.98    0.58
   3  -3  15    0.91    0.47
  -3   3  15    1.60    0.42
  -4   3 -15    8.96    0.96
   4  -3 -15    9.54    1.01
   4   3  15    7.39    0.84
  -4  -3  15    7.15    0.73
   4   3 -15    7.46    0.94
  -4   3  15    9.08    0.78
   4  -3  15    6.84    0.80
  -5   3 -15    0.16    0.43
  -5  -3  15   -0.17    0.32
   5  -3 -15    0.04    0.41
   5   3  15    0.00    0.43
   5   3 -15    0.25    0.46
  -5   3  15    0.33    0.35
   5  -3  15    0.36    0.43
   0   3  16    0.04    0.39
   0  -3  16   -0.04    0.33
   0  -3 -16    0.25    0.49
   0   3 -16   -0.07    0.42
   1  -3 -16    0.42    0.50
  -1  -3  16    0.06    0.38
   1   3  16    1.61    0.51
  -1   3 -16    0.62    0.50
  -1   3  16    0.00    0.36
  -1  -3 -16    0.81    0.53
   1   3 -16   -0.16    0.44
   1  -3  16    0.15    0.40
  -2   3 -16   -0.14    0.42
   2   3  16   -0.35    0.37
   2  -3 -16    0.23    0.46
  -2  -3  16   -0.40    0.32
  -2   3  16   -0.22    0.35
   2  -3  16   -0.27    0.39
   2   3 -16   -0.32    0.44
  -2  -3 -16   -0.58    0.43
  -3   3 -16    0.57    0.51
  -3  -3 -16    0.65    0.51
  -3   3  16    0.16    0.37
   3  -3  16    0.29    0.44
   0  -4   0  271.74    5.78
   0  -4   0  268.46    5.93
   0  -4   0  273.27    5.74
   0  -4   0  258.78    6.26
  -1  -4   0    0.03    0.10
  -1  -4   0   -0.07    0.07
   1  -4   0    0.01    0.10
  -1  -4   0   -0.12    0.07
  -1  -4   0   -0.09    0.08
   1  -4   0   -0.10    0.07
   1  -4   0    0.02    0.06
  -1   4   0   -0.03    0.07
   2  -4   0  533.44   12.78
  -2  -4   0  569.79   11.83
  -2  -4   0  545.32   12.22
  -2   4   0  567.66   11.84
   2   4   0  548.42   12.71
   2   4   0  555.76   11.87
   2  -4   0  559.61   11.91
   3  -4   0   -0.25    0.12
   3   4   0   -0.41    0.10
   3  -4   0   -0.18    0.14
   3   4   0    0.04    0.10
  -3   4   0   -0.16    0.12
  -3  -4   0   -0.25    0.11
  -3  -4   0   -0.19    0.12
   4  -4   0  236.72    5.60
  -4  -4   0  233.28    5.39
   4  -4   0  234.57    5.15
  -4  -4   0  227.34    5.32
   4   4   0  235.72    5.36
  -4   4   0  236.59    5.24
   4  -4   0  226.15    5.39
   4   4   0  239.55    5.29
  -5  -4   0   -0.09    0.12
  -5   4   0    0.05    0.15
   5  -4   0   -0.17    0.16
   5  -4   0   -0.19    0.12
  -5  -4   0    0.10    0.17
   5   4   0   -0.01    0.16
  -5   4   0    0.03    0.08
   6   4   0  268.13    6.15
   6  -4   0  266.43    6.28
  -6   4   0  261.45    6.05
  -6  -4   0  260.86    6.17
  -6  -4   0  266.36    6.18
   6  -4   0  261.81    6.34
   7  -4   0    0.01    0.19
  -7   4   0    0.21    0.21
   7  -4   0    0.07    0.25
   7   4   0    0.05    0.26
  -7  -4   0    0.01    0.17
  -7  -4   0    0.26    0.21
  -8  -4   0  169.36    4.31
  -8  -4   0  170.10    4.39
  -8   4   0  174.94    4.34
   8   4   0  167.73    4.42
   8  -4   0  179.67    4.56
  -9  -4   0    0.00    0.23
  -9   4   0   -0.06    0.25
   9  -4   0   -0.20    0.34
  -9  -4   0    0.22    0.31
   9   4   0    0.10    0.34
  10  -4   0   73.35    2.45
  10   4   0   68.54    2.41
 -10   4   0   65.26    2.27
 -10  -4   0   71.18    2.33
 -10  -4   0   68.05    2.18
 -11  -4   0   -0.14    0.29
 -11  -4   0   -0.15    0.37
 -11   4   0    0.15    0.35
  11   4   0    0.21    0.45
  11  -4   0   -0.20    0.38
  12  -4   0   72.99    2.66
 -12   4   0   77.85    2.71
 -12  -4   0   73.97    2.59
  12   4   0   74.33    2.77
   0  -4  -1   -0.27    0.06
   0  -4   1   -0.18    0.06
   0   4  -1   -0.28    0.05
   0  -4  -1    0.02    0.10
   0  -4   1   -0.20    0.07
   0  -4  -1   -0.12    0.06
   0  -4  -1    0.02    0.10
   1  -4  -1  369.46    8.89
  -1  -4   1  402.16    8.15
   1  -4  -1  391.43    8.22
  -1  -4   1  391.57    8.24
  -1  -4   1  366.79    8.46
  -1   4  -1  395.05    8.19
  -1  -4  -1  397.21    8.21
   1  -4   1  359.57    8.91
  -1   4   1  391.68    8.21
   1  -4   1  372.08    8.37
  -1  -4  -1  380.24    8.53
  -1  -4  -1  391.35    8.21
  -1  -4  -1  387.10    8.85
   1   4  -1  382.36    8.91
  -1   4   1  376.36    8.43
  -2  -4   1    7.52    0.34
  -2   4  -1    7.81    0.32
   2  -4  -1    7.82    0.34
   2  -4  -1    7.63    0.37
  -2  -4   1    7.79    0.29
   2   4   1    8.22    0.31
  -2  -4  -1    7.85    0.30
  -2  -4  -1    8.30    0.39
   2  -4   1    7.55    0.37
   2   4  -1    8.06    0.37
  -2  -4  -1    7.71    0.33
  -2   4   1    8.41    0.22
   2   4  -1    8.18    0.32
   2  -4   1    8.34    0.22
   2  -4   1    7.83    0.34
  -3  -4   1  361.85    7.86
   3  -4  -1  363.96    7.95
  -3   4  -1  363.83    7.84
  -3  -4   1  355.56    8.07
   3  -4  -1  355.63    8.43
   3   4   1  356.83    7.86
   3  -4   1  368.52    7.96
   3  -4   1  349.82    7.84
   3   4  -1  374.39    8.36
  -3  -4  -1  342.07    8.26
  -3   4   1  361.02    7.84
  -3  -4  -1  372.24    7.90
  -3   4   1  365.56    7.83
   3  -4   1  356.16    8.45
  -3  -4  -1  362.89    8.13
   3   4  -1  364.45    7.87
   4  -4  -1    0.59    0.16
  -4  -4   1    0.57    0.16
  -4   4  -1    0.83    0.18
   4  -4  -1    0.96    0.23
  -4  -4   1    0.52    0.18
   4   4   1    0.88    0.20
  -4   4   1    0.92    0.09
   4   4  -1    0.98    0.12
  -4   4   1    0.75    0.16
  -4  -4  -1    0.87    0.20
   4  -4   1    0.51    0.20
   4  -4   1    0.85    0.11
  -4  -4  -1    0.60    0.17
   4  -4   1    0.54    0.16
   4   4  -1    0.58    0.17
  -5  -4   1  190.05    4.48
   5  -4  -1  185.03    4.61
  -5  -4   1  188.12    4.49
   5   4   1  191.98    4.47
  -5   4  -1  194.88    4.42
   5  -4  -1  180.33    4.58
  -5  -4  -1  186.23    4.50
   5   4  -1  192.67    4.38
  -5   4   1  183.61    4.36
   5  -4   1  187.03    4.62
   5  -4   1  196.40    4.29
   5   4  -1  192.44    4.46
   5  -4   1  180.98    4.54
  -5  -4  -1  187.41    4.52
  -5   4   1  201.50    4.24
  -6  -4   1    4.51    0.40
  -6  -4   1    4.07    0.45
   6  -4  -1    4.64    0.53
   6  -4  -1    4.76    0.36
   6   4   1    4.23    0.45
  -6   4  -1    4.94    0.46
   6   4  -1    5.01    0.47
  -6  -4  -1    4.98    0.46
  -6  -4  -1    5.60    0.53
   6  -4   1    4.77    0.37
  -6   4   1    4.61    0.43
   6  -4   1    4.41    0.49
  -7  -4   1  161.74    4.06
  -7  -4   1  168.44    4.18
   7  -4  -1  168.90    4.32
  -7   4  -1  160.97    4.07
   7   4   1  163.02    4.17
   7  -4  -1  163.44    4.12
   7   4  -1  162.93    4.15
   7  -4   1  170.31    4.15
  -7  -4  -1  166.14    4.17
   7  -4   1  169.41    4.26
  -7   4   1  169.54    4.06
  -7  -4  -1  154.54    4.09
  -8   4  -1    6.12    0.61
  -8  -4   1    7.16    0.52
   8   4   1    6.13    0.64
   8  -4  -1    7.58    0.76
  -8  -4   1    5.73    0.61
  -8  -4  -1    6.20    0.63
  -8   4   1    7.59    0.65
   8  -4   1    6.01    0.66
   8   4  -1    5.88    0.62
  -8  -4  -1    6.35    0.58
  -9  -4   1   87.79    2.50
   9   4   1   87.14    2.71
   9  -4  -1   88.50    2.77
  -9  -4   1   85.38    2.62
  -9   4  -1   87.60    2.62
  -9  -4  -1   86.53    2.52
   9  -4   1   85.85    2.70
   9   4  -1   85.04    2.67
  -9   4   1   83.72    2.55
  -9  -4  -1   83.30    2.59
 -10  -4   1   -0.32    0.25
  10   4   1   -0.03    0.36
 -10   4  -1    0.16    0.34
  10  -4  -1    0.87    0.46
 -10  -4   1    0.26    0.32
 -10   4   1   -0.35    0.29
  10  -4   1   -0.25    0.36
 -10  -4  -1    0.02    0.29
  10   4  -1   -0.11    0.38
 -10  -4  -1    0.45    0.37
 -11   4  -1   48.80    1.97
  11   4   1   46.71    2.03
 -11  -4   1   48.04    1.77
 -11  -4   1   50.16    1.94
  11  -4  -1   49.12    2.01
 -11  -4  -1   49.14    1.80
 -11   4   1   46.73    1.89
 -11  -4  -1   44.56    1.85
  11  -4   1   52.45    2.03
  11   4  -1   50.91    2.07
 -12  -4   1    3.40    0.64
  12  -4  -1    4.02    0.75
  12   4   1    3.90    0.79
 -12   4  -1    3.72    0.70
  12  -4   1    2.86    0.67
 -12  -4  -1    3.91    0.67
  12   4  -1    3.55    0.79
 -12   4   1    3.89    0.69
   0  -4   2  228.00    4.87
   0   4  -2  223.68    5.34
   0  -4  -2  230.26    4.79
   0  -4   2  223.61    4.97
   0  -4  -2  218.70    5.24
   0  -4  -2  224.89    4.84
   0   4   2  208.35    5.07
   0   4  -2  224.85    4.75
   1  -4  -2    0.11    0.10
  -1  -4   2   -0.01    0.04
  -1   4  -2    0.03    0.10
  -1  -4   2    0.12    0.08
  -1   4  -2    0.10    0.06
   1  -4  -2    0.15    0.06
  -1  -4   2   -0.01    0.06
  -1   4   2    0.26    0.08
  -1   4   2    0.10    0.07
   1  -4   2    0.20    0.06
  -1  -4  -2    0.07    0.07
  -1  -4  -2    0.02    0.06
  -1  -4  -2    0.02    0.08
  -1  -4  -2    0.01    0.09
   1   4  -2    0.16    0.13
   1  -4   2    0.32    0.09
  -2  -4   2  158.42    3.73
  -2   4  -2  163.91    3.61
  -2  -4   2  166.69    3.55
  -2  -4   2  159.54    3.63
   2  -4  -2  163.52    3.64
  -2   4  -2  164.06    3.99
   2   4   2  162.76    3.60
   2  -4  -2  157.86    3.93
  -2  -4  -2  161.31    3.85
  -2   4   2  167.72    3.62
   2   4  -2  164.47    3.98
   2  -4   2  164.04    3.62
  -2  -4  -2  163.50    3.83
   2  -4   2  160.04    3.66
  -2  -4  -2  164.16    3.65
  -3   4  -2    4.73    0.33
  -3  -4   2    5.11    0.30
   3  -4  -2    5.09    0.32
  -3  -4   2    5.30    0.30
   3  -4  -2    5.41    0.35
  -3   4  -2    5.10    0.29
   3   4   2    5.18    0.31
   3   4  -2    5.27    0.30
   3  -4   2    5.37    0.33
  -3  -4  -2    4.90    0.31
  -3   4   2    5.87    0.30
  -3  -4  -2    4.91    0.34
   3   4  -2    5.08    0.30
   3  -4   2    5.46    0.21
  -3  -4  -2    5.18    0.22
  -3   4   2    5.41    0.19
  -4  -4   2  165.45    3.99
   4  -4  -2  162.93    4.09
   4  -4  -2  171.91    4.20
  -4  -4   2  172.03    4.03
  -4   4  -2  169.81    4.22
   4   4   2  178.04    4.00
  -4   4  -2  175.82    3.97
  -4   4   2  166.53    3.81
  -4  -4  -2  169.39    4.04
  -4  -4  -2  173.41    4.13
  -4   4   2  173.51    3.92
   4  -4   2  171.98    4.07
   4  -4   2  178.34    3.88
   4   4  -2  175.86    3.98
   4   4  -2  170.81    4.09
   5   4   2    3.54    0.38
   5  -4  -2    3.46    0.33
  -5   4  -2    3.66    0.36
  -5  -4   2    3.50    0.33
  -5   4  -2    3.74    0.35
  -5  -4   2    3.04    0.37
   5  -4  -2    4.25    0.48
  -5  -4  -2    4.08    0.42
  -5  -4  -2    3.78    0.38
   5   4  -2    3.56    0.37
   5   4  -2    3.76    0.23
   5  -4   2    3.86    0.26
   5  -4   2    2.32    0.35
  -5   4   2    3.33    0.32
  -5   4   2    4.30    0.21
   6   4   2  107.70    2.88
  -6   4  -2  111.78    2.87
  -6  -4   2  111.05    2.81
   6  -4  -2  112.62    3.06
  -6  -4   2  108.72    2.89
  -6   4  -2  107.56    2.83
   6  -4  -2  111.48    2.86
   6  -4   2  110.14    2.95
  -6  -4  -2  107.69    2.88
  -6  -4  -2  106.83    2.90
  -6   4   2  110.75    2.77
   6   4  -2  111.10    2.87
   7  -4  -2    1.26    0.26
   7  -4  -2    1.33    0.39
  -7  -4   2    1.58    0.28
  -7   4  -2    1.44    0.27
  -7  -4   2    1.36    0.34
   7   4   2    1.37    0.35
  -7   4  -2    1.44    0.31
   7   4  -2    1.47    0.34
  -7  -4  -2    1.13    0.33
  -7  -4  -2    0.99    0.29
   7  -4   2    0.68    0.29
  -7   4   2    1.18    0.28
  -8   4  -2  125.57    3.32
  -8  -4   2  121.12    3.33
  -8  -4   2  120.89    3.19
   8  -4  -2  122.45    3.50
   8   4   2  120.19    3.36
  -8   4   2  120.24    3.20
   8  -4   2  124.94    3.39
  -8  -4  -2  120.83    3.28
   8   4  -2  116.95    3.32
  -8  -4  -2  124.14    3.33
  -9   4  -2   -0.07    0.26
   9   4   2   -0.25    0.29
  -9  -4   2    0.14    0.29
   9  -4  -2   -0.06    0.34
  -9  -4   2   -0.12    0.21
   9  -4   2    0.03    0.32
   9   4  -2    0.12    0.36
  -9   4   2    0.26    0.27
  -9  -4  -2    0.05    0.28
  -9  -4  -2    0.08    0.25
  10  -4  -2   98.81    3.11
 -10   4  -2   99.04    3.00
  10   4   2   96.05    3.05
 -10  -4   2   95.46    2.94
 -10  -4   2   96.27    2.78
  10   4  -2   97.74    3.05
 -10  -4  -2   96.86    2.87
 -10  -4  -2   92.62    2.88
 -10   4   2   96.31    2.89
  10  -4   2   96.45    2.97
  11  -4  -2    1.26    0.56
 -11   4  -2    1.57    0.50
 -11  -4   2    2.50    0.57
  11   4   2    1.48    0.55
 -11  -4   2    2.59    0.49
 -11  -4  -2    1.80    0.46
  11   4  -2    2.16    0.61
 -11  -4  -2    2.02    0.49
  11  -4   2    1.82    0.55
 -11   4   2    1.67    0.49
 -12  -4   2   53.01    2.06
  12  -4  -2   47.97    2.10
  12   4   2   46.87    2.09
 -12   4   2   49.25    2.01
 -12  -4  -2   48.61    1.96
   0   4  -3    0.05    0.04
   0   4  -3    0.00    0.10
   0  -4  -3    0.13    0.07
   0  -4  -3   -0.01    0.08
   0  -4   3    0.00    0.06
   0   4   3    0.16    0.09
   0  -4  -3    0.00    0.04
   0  -4   3   -0.05    0.06
   1   4   3  227.22    5.42
   1  -4  -3  233.36    5.11
  -1  -4   3  237.29    5.13
  -1   4  -3  230.36    5.67
   1  -4  -3  227.55    5.57
   1  -4  -3  237.94    5.04
  -1  -4   3  232.48    5.27
  -1   4  -3  237.37    5.06
   1   4   3  238.71    5.03
  -1  -4  -3  239.93    5.13
   1   4  -3  227.42    5.67
  -1   4   3  237.11    5.26
   1  -4   3  236.54    5.14
   1  -4   3  239.68    5.23
  -1  -4  -3  232.92    5.52
  -1   4   3  232.46    5.11
  -2  -4   3    0.08    0.08
  -2   4  -3    0.66    0.17
   2  -4  -3    0.21    0.11
   2  -4  -3    0.22    0.09
   2   4   3    0.12    0.08
  -2  -4   3    0.18    0.06
  -2  -4   3    0.03    0.08
   2   4   3    0.02    0.12
  -2   4  -3    0.02    0.08
  -2  -4  -3    0.02    0.08
  -2  -4  -3    0.09    0.08
  -2   4   3    0.08    0.09
   2  -4   3    0.28    0.11
   2   4  -3    0.22    0.13
   2  -4   3    0.07    0.07
  -2   4   3    0.07    0.06
  -3   4  -3  268.87    5.87
  -3  -4   3  260.09    6.00
   3   4   3  266.79    5.86
   3  -4  -3  267.13    6.31
   3  -4  -3  264.21    5.93
  -3   4  -3  263.84    6.36
   3   4   3  261.48    6.17
  -3  -4   3  252.60    5.82
   3   4  -3  265.14    5.86
   3  -4   3  269.74    5.93
  -3   4   3  256.96    5.81
  -3  -4  -3  271.23    6.15
  -3   4   3  272.83    5.86
   3   4  -3  267.52    6.30
  -3  -4  -3  268.24    5.91
  -3  -4  -3  260.63    6.17
   3  -4   3  263.86    5.89
   4   4   3    0.10    0.14
  -4  -4   3   -0.20    0.12
   4  -4  -3   -0.02    0.11
   4  -4  -3    0.12    0.15
  -4   4  -3    0.07    0.12
  -4  -4   3    0.05    0.11
  -4   4  -3    0.21    0.14
  -4   4   3    0.06    0.11
  -4   4   3   -0.01    0.07
   4   4  -3    0.04    0.12
  -4  -4  -3    0.18    0.14
  -4  -4  -3    0.03    0.14
   4  -4   3    0.40    0.17
  -4  -4  -3    0.04    0.07
   4   4  -3    0.01    0.11
   4  -4   3    0.12    0.10
  -5   4  -3  149.48    3.66
   5  -4  -3  149.25    3.85
  -5   4  -3  149.40    3.84
   5  -4  -3  156.68    3.82
  -5  -4   3  153.83    3.71
   5   4   3  153.50    3.70
  -5  -4   3  157.53    3.69
   5   4  -3  157.05    3.70
  -5  -4  -3  147.60    3.73
  -5  -4  -3  154.09    3.83
  -5   4   3  159.30    3.46
   5  -4   3  143.81    3.73
  -5   4   3  153.41    3.58
   5   4  -3  152.57    3.66
   5  -4   3  144.83    3.55
  -6  -4   3    1.56    0.31
   6  -4  -3    1.97    0.40
   6   4   3    1.41    0.31
  -6   4  -3    1.60    0.30
  -6   4  -3    2.41    0.31
   6  -4  -3    1.27    0.24
  -6  -4   3    1.37    0.26
  -6   4   3    1.27    0.25
   6   4  -3    1.36    0.28
  -6  -4  -3    1.09    0.27
  -6  -4  -3    0.77    0.26
   6  -4   3    1.46    0.31
   7  -4  -3  103.19    2.97
  -7   4  -3   98.86    2.68
  -7  -4   3   98.10    2.63
   7   4   3   97.89    2.76
   7  -4  -3  100.24    2.66
  -7   4  -3   95.89    2.71
  -7  -4   3   97.46    2.76
   7  -4   3  103.08    2.80
  -7   4   3   98.01    2.61
  -7  -4  -3   97.07    2.75
   7   4  -3   99.23    2.74
  -8   4  -3    0.46    0.28
  -8  -4   3    0.33    0.24
   8  -4  -3    0.01    0.31
   8   4   3    0.11    0.29
   8  -4  -3    0.51    0.23
  -8  -4   3    0.09    0.28
   8  -4   3    0.62    0.33
   8   4  -3    0.09    0.30
  -8  -4  -3    0.43    0.28
  -8  -4  -3    0.40    0.28
  -8   4   3    0.18    0.26
   9   4   3   96.01    2.94
  -9   4  -3   99.74    2.92
  -9  -4   3  101.88    2.93
  -9  -4   3   94.27    2.70
   9  -4  -3   97.87    3.07
   9   4  -3   92.18    2.89
  -9  -4  -3  100.49    2.87
   9  -4   3   95.73    2.88
  -9   4   3   96.30    2.76
  -9  -4  -3   93.80    2.83
 -10  -4   3   -0.31    0.24
  10  -4  -3   -0.06    0.40
 -10   4  -3    0.41    0.36
  10   4   3   -0.37    0.34
  10   4   3   -0.33    0.42
 -10  -4   3    0.35    0.37
  10  -4   3   -0.26    0.34
  10   4  -3   -0.25    0.33
 -10  -4  -3    0.05    0.32
 -10   4   3    0.15    0.33
  11  -4  -3   68.01    2.51
 -11  -4   3   69.65    2.41
 -11   4  -3   71.66    2.52
  11   4   3   70.41    2.37
  11   4   3   67.32    2.47
 -11  -4   3   65.81    2.19
  11  -4   3   70.02    2.40
 -11   4   3   63.00    2.28
  11   4  -3   65.68    2.46
 -11  -4  -3   63.78    2.29
  12  -4  -3    0.04    0.54
  12   4   3    0.35    0.53
 -12  -4  -3   -0.13    0.37
 -12   4   3   -0.62    0.35
   0   4   4   96.05    2.41
   0  -4  -4   99.15    2.10
   0  -4  -4  101.39    2.27
   0  -4   4   98.82    2.26
   0  -4   4   97.76    2.34
   0  -4  -4   92.15    2.49
   0   4  -4  100.05    2.11
   1  -4  -4   20.31    0.61
   1  -4  -4   20.37    0.50
  -1   4  -4   21.03    0.60
  -1  -4   4   20.32    0.61
  -1   4  -4   19.23    0.81
   1   4   4   20.17    0.52
  -1  -4   4   19.99    0.65
   1   4   4   19.16    0.74
  -1  -4  -4   20.47    0.62
   1   4  -4   20.29    0.82
   1  -4   4   19.65    0.62
  -1   4   4   21.23    0.65
   1  -4   4   20.83    0.62
  -1  -4  -4   19.45    0.69
   2  -4  -4  152.69    3.35
   2   4   4  148.12    3.69
  -2  -4   4  152.09    3.40
  -2   4  -4  150.20    3.41
  -2   4  -4  149.77    3.84
  -2  -4   4  146.65    3.51
   2   4   4  155.53    3.36
   2  -4  -4  149.27    3.73
  -2  -4   4  153.31    3.25
  -2   4   4  151.78    3.43
   2  -4   4  144.99    3.44
   2   4  -4  152.72    3.80
  -2  -4  -4  149.12    3.65
   2  -4   4  150.68    3.42
  -2  -4  -4  149.23    3.42
  -2   4   4  144.87    3.38
  -3   4  -4   42.55    1.35
   3  -4  -4   41.00    1.20
   3  -4  -4   42.00    1.28
  -3  -4   4   40.89    1.18
  -3   4  -4   42.13    1.19
   3   4   4   43.41    1.16
  -3  -4   4   39.36    1.11
  -3   4   4   41.80    1.08
  -3  -4  -4   42.09    1.17
   3  -4   4   43.47    1.21
   3  -4   4   41.81    1.12
  -3  -4  -4   43.90    1.22
  -3   4   4   41.10    1.13
   3   4  -4   40.49    1.14
   3   4  -4   43.13    1.29
   4  -4  -4  135.71    3.40
   4  -4  -4  123.12    3.29
  -4  -4   4  132.76    3.21
  -4   4  -4  130.17    3.44
   4   4   4  136.90    3.20
  -4  -4   4  135.12    3.16
  -4   4  -4  132.01    3.21
  -4   4   4  134.99    3.06
  -4  -4  -4  135.96    3.27
   4   4  -4  134.68    3.17
   4  -4   4  134.80    3.15
  -4  -4  -4  133.32    3.20
  -4   4   4  131.75    3.11
   4  -4   4  132.36    3.24
   4   4  -4  131.46    3.34
   5  -4  -4    3.04    0.42
   5   4   4    2.42    0.38
  -5  -4   4    2.60    0.33
   5   4   4    2.99    0.36
  -5  -4   4    2.74    0.30
  -5   4  -4    2.70    0.34
  -5   4  -4    3.05    0.36
   5  -4  -4    2.87    0.32
  -5   4   4    2.30    0.28
  -5   4   4    2.85    0.22
   5  -4   4    2.31    0.34
   5   4  -4    3.17    0.36
   5  -4   4    3.27    0.30
   5   4  -4    2.41    0.27
  -5  -4  -4    1.81    0.31
   6  -4  -4   75.89    2.34
  -6  -4   4   77.16    2.07
   6   4   4   71.70    2.21
   6   4   4   79.87    2.18
   6  -4  -4   77.01    2.13
  -6   4  -4   73.63    2.16
  -6   4  -4   75.22    2.16
  -6  -4   4   77.95    2.16
   6   4  -4   76.62    2.14
  -6  -4  -4   73.45    2.18
  -6   4   4   76.37    2.03
   6  -4   4   72.25    2.16
   7  -4  -4   35.23    1.50
  -7  -4   4   35.75    1.34
   7   4   4   35.22    1.35
  -7   4  -4   34.79    1.33
   7   4   4   34.96    1.36
  -7  -4   4   34.16    1.20
   7  -4  -4   34.28    1.20
  -7   4  -4   36.01    1.25
   7  -4   4   35.23    1.34
  -7   4   4   34.89    1.20
  -7  -4  -4   34.83    1.33
   7   4  -4   35.58    1.32
  -8   4  -4   62.85    2.04
  -8  -4   4   59.49    2.02
   8  -4  -4   61.38    1.85
   8   4   4   62.04    2.07
   8   4   4   61.74    2.04
   8  -4  -4   63.43    2.22
  -8  -4   4   60.07    1.86
  -8   4   4   61.15    1.88
   8   4  -4   58.36    1.99
   8  -4   4   65.31    2.04
  -9   4  -4    5.38    0.66
   9   4   4    5.04    0.68
   9   4   4    5.70    0.67
  -9  -4   4    6.14    0.70
  -9  -4   4    4.84    0.53
   9  -4  -4    6.24    0.81
  -9  -4  -4    5.50    0.63
   9   4  -4    5.73    0.70
  -9   4   4    6.54    0.63
   9  -4   4    5.06    0.63
  10   4   4   43.33    1.79
 -10  -4   4   42.43    1.54
  10   4   4   40.29    1.65
  10  -4  -4   44.35    1.88
 -10   4  -4   39.97    1.74
  10   4  -4   37.49    1.69
 -10   4   4   41.32    1.60
 -10  -4  -4   38.00    1.59
  10  -4   4   41.05    1.66
 -11  -4   4    2.63    0.49
 -11   4  -4    4.72    0.74
  11  -4  -4    2.78    0.69
  11   4   4    2.88    0.66
  11   4   4    3.04    0.62
 -11   4   4    3.93    0.61
  11  -4   4    2.28    0.56
 -11  -4  -4    3.64    0.60
  11   4  -4    2.92    0.67
   0  -4   5    0.09    0.09
   0   4   5   -0.02    0.11
   0  -4  -5    0.07    0.09
   0  -4   5   -0.05    0.09
   0  -4  -5   -0.04    0.10
   0   4  -5   -0.03    0.04
   0   4  -5   -0.05    0.14
  -1   4  -5  109.77    2.55
   1  -4  -5  108.25    2.93
   1  -4  -5  114.66    2.61
   1  -4  -5  114.63    2.44
  -1  -4   5  117.39    2.62
  -1  -4   5  111.43    2.73
   1   4   5  116.02    2.48
   1   4   5  109.67    2.85
  -1  -4  -5  115.18    2.64
   1  -4   5  113.38    2.70
   1   4  -5  115.70    3.07
  -1  -4  -5  112.71    2.92
   1  -4   5  112.24    2.62
  -1   4   5  113.45    2.72
  -2   4  -5   11.36    0.62
  -2  -4   5   11.29    0.49
   2   4   5   11.32    0.41
  -2  -4   5   11.23    0.44
  -2   4  -5   11.76    0.49
   2   4   5   10.52    0.58
  -2  -4   5   10.82    0.33
   2  -4  -5   11.93    0.41
   2  -4  -5   12.51    0.57
   2  -4   5   10.97    0.45
   2   4  -5   12.13    0.63
  -2   4   5   11.65    0.45
   2  -4   5   11.79    0.47
  -2   4   5   11.30    0.44
  -2  -4  -5   11.14    0.47
  -2  -4  -5   11.40    0.53
   3  -4  -5   58.28    1.72
  -3  -4   5   57.43    1.58
  -3   4  -5   57.43    1.80
  -3   4  -5   58.46    1.61
  -3  -4   5   59.14    1.45
   3  -4  -5   59.57    1.58
   3   4   5   60.28    1.53
   3   4   5   58.54    1.78
   3  -4   5   57.54    1.54
  -3  -4  -5   60.73    1.65
   3  -4   5   58.36    1.56
   3   4  -5   60.68    1.75
  -3  -4  -5   59.64    1.59
  -3   4   5   56.68    1.50
  -3   4   5   58.59    1.49
   3   4  -5   58.50    1.53
   4  -4  -5    6.87    0.45
  -4   4  -5    7.15    0.46
  -4  -4   5    7.25    0.42
  -4   4  -5    7.10    0.51
  -4  -4   5    7.20    0.40
   4  -4  -5    6.68    0.49
   4   4   5    6.50    0.42
   4   4   5    8.44    0.55
   4   4  -5    7.28    0.43
  -4   4   5    6.43    0.39
   4   4  -5    6.72    0.44
   4  -4   5    7.05    0.39
  -4   4   5    7.10    0.34
  -4  -4  -5    6.65    0.44
  -4  -4  -5    7.32    0.39
   4  -4   5    6.29    0.43
   5   4   5   78.63    2.10
   5  -4  -5   73.42    2.15
  -5   4  -5   77.74    2.24
  -5   4  -5   75.93    2.13
   5   4   5   74.78    2.25
  -5  -4   5   76.18    2.04
  -5  -4   5   75.09    2.03
   5  -4  -5   72.33    2.24
   5  -4   5   73.66    2.11
  -5  -4  -5   77.45    2.17
   5  -4   5   78.04    2.02
   5   4  -5   79.59    2.12
  -5   4   5   75.95    1.99
   5   4  -5   74.70    2.05
  -5   4   5   81.40    1.90
   6  -4  -5    7.99    0.75
  -6  -4   5    7.94    0.49
  -6  -4   5    8.60    0.56
  -6   4  -5    8.50    0.57
   6   4   5    9.32    0.62
   6  -4  -5    9.37    0.56
  -6   4  -5    6.72    0.59
   6   4   5    9.43    0.66
  -6  -4  -5    9.31    0.64
   6  -4   5    8.34    0.58
   6   4  -5    8.31    0.48
   6   4  -5    7.85    0.55
  -6   4   5    7.82    0.50
  -7   4  -5   36.35    1.32
  -7  -4   5   39.50    1.38
  -7  -4   5   36.47    1.25
   7   4   5   36.55    1.42
  -7   4  -5   34.95    1.37
   7  -4  -5   37.69    1.28
   7  -4  -5   35.34    1.54
   7   4   5   36.17    1.39
  -7  -4  -5   36.91    1.39
   7   4  -5   36.01    1.36
  -7   4   5   35.02    1.22
   7  -4   5   34.73    1.35
   8   4   5    2.97    0.49
   8  -4  -5    2.37    0.53
   8   4   5    2.40    0.49
  -8  -4   5    2.13    0.37
  -8   4  -5    2.71    0.48
   8  -4  -5    2.24    0.36
  -8   4   5    2.63    0.41
   8   4  -5    2.30    0.47
  -8  -4  -5    2.54    0.45
   8  -4   5    2.80    0.47
  -9  -4   5   24.78    1.07
   9   4   5   22.84    1.17
  -9   4  -5   24.60    1.23
   9  -4  -5   22.28    1.32
   9   4   5   25.19    1.25
  -9   4   5   24.28    1.09
   9   4  -5   23.17    1.22
   9  -4   5   24.91    1.19
  -9  -4  -5   25.95    1.20
 -10   4  -5    0.11    0.33
  10   4   5   -0.38    0.34
 -10  -4   5   -0.23    0.27
  10  -4  -5   -0.40    0.42
  10   4   5    0.57    0.40
 -10  -4  -5   -0.40    0.27
  10  -4   5   -0.45    0.32
  10   4  -5    0.39    0.42
 -10   4   5    0.02    0.31
  11   4   5   18.13    1.16
  11   4   5   18.30    1.18
 -11  -4   5   20.56    1.07
 -11   4  -5   18.85    1.18
  11  -4  -5   22.90    1.36
  11  -4   5   19.50    1.17
 -11  -4  -5   19.61    1.14
  11   4  -5   19.32    1.26
 -11   4   5   17.51    1.10
   0   4  -6   98.05    2.10
   0  -4  -6   98.06    2.30
   0  -4   6   97.23    2.28
   0  -4   6   96.64    2.40
   0  -4  -6   95.08    2.63
   0   4   6   95.36    2.46
  -1  -4   6   10.47    0.48
  -1   4  -6   11.32    0.66
  -1   4  -6   11.26    0.38
   1  -4  -6   11.06    0.44
   1   4   6   10.33    0.56
   1  -4  -6    9.42    0.56
  -1  -4   6   11.61    0.45
  -1  -4  -6   10.87    0.59
   1  -4   6   10.94    0.48
  -1  -4  -6   11.26    0.46
   1  -4   6   10.72    0.43
   1   4  -6   11.64    0.65
  -1   4   6   10.74    0.48
  -2   4  -6   27.87    1.12
  -2  -4   6   28.88    0.93
  -2  -4   6   28.93    0.70
  -2  -4   6   28.33    0.86
   2   4   6   29.69    0.77
   2  -4  -6   28.38    1.05
   2  -4  -6   30.05    0.78
  -2   4  -6   29.60    0.88
   2  -4   6   27.97    0.87
  -2  -4  -6   29.74    0.91
  -2   4   6   28.90    0.86
  -2  -4  -6   28.38    1.04
  -2   4   6   28.81    0.88
   2   4  -6   28.04    1.10
   2  -4   6   28.76    0.91
   3   4   6    2.27    0.35
  -3  -4   6    2.55    0.21
   3  -4  -6    1.73    0.28
   3   4   6    2.55    0.25
   3  -4  -6    2.58    0.28
  -3   4  -6    1.89    0.26
  -3  -4   6    1.65    0.23
  -3   4  -6    2.13    0.35
   3  -4   6    1.97    0.25
   3  -4   6    2.12    0.26
  -3   4   6    2.35    0.24
   3   4  -6    2.07    0.25
  -3   4   6    2.01    0.23
  -3  -4  -6    2.42    0.28
  -3  -4  -6    2.57    0.32
   3   4  -6    2.32    0.34
  -4  -4   6   28.64    0.96
   4   4   6   29.24    0.95
  -4   4  -6   27.18    0.99
  -4   4  -6   27.29    1.10
   4   4   6   28.05    1.12
   4  -4  -6   28.24    1.05
  -4  -4   6   28.56    0.87
   4  -4  -6   25.31    1.03
   4  -4   6   29.25    0.98
   4   4  -6   28.37    1.05
  -4   4   6   27.40    0.85
  -4  -4  -6   29.22    1.00
  -4  -4  -6   27.83    1.00
  -4   4   6   27.60    0.89
   4   4  -6   27.72    0.93
   4  -4   6   28.11    0.95
  -5  -4   6    0.12    0.15
  -5   4  -6    0.21    0.21
   5  -4  -6   -0.02    0.18
   5  -4  -6    0.15    0.25
   5   4   6    0.22    0.21
  -5   4  -6   -0.07    0.17
   5   4   6    0.11    0.22
   5  -4   6   -0.09    0.19
  -5   4   6    0.00    0.16
   5  -4   6    0.17    0.18
  -5  -4  -6   -0.08    0.16
   5   4  -6    0.05    0.18
  -5   4   6    0.06    0.13
   5   4  -6    0.06    0.19
   6  -4  -6   42.84    1.67
   6   4   6   47.47    1.50
  -6   4  -6   46.66    1.53
  -6   4  -6   45.35    1.55
   6   4   6   44.15    1.58
   6  -4  -6   44.50    1.49
  -6  -4   6   46.41    1.41
   6  -4   6   42.57    1.48
  -6   4   6   44.36    1.36
   6   4  -6   45.65    1.43
   6   4  -6   45.27    1.49
   6  -4   6   43.28    1.39
  -6  -4  -6   42.44    1.52
   7  -4  -6    7.02    0.55
  -7   4  -6    8.66    0.72
   7   4   6    6.25    0.64
   7   4   6    6.76    0.64
  -7  -4   6    5.86    0.51
   7  -4  -6    6.63    0.77
   7  -4   6    6.20    0.60
  -7  -4  -6    6.75    0.65
   7   4  -6    7.65    0.67
  -7   4   6    6.77    0.56
  -8  -4   6    6.02    0.55
   8  -4  -6    5.68    0.77
   8   4   6    6.10    0.64
   8   4   6    6.32    0.66
  -8   4  -6    6.19    0.67
   8  -4  -6    6.02    0.55
  -8  -4  -6    5.08    0.60
   8   4  -6    6.27    0.66
  -8   4   6    6.55    0.59
   8  -4   6    6.12    0.62
   9   4   6   -0.23    0.34
  -9  -4   6    0.25    0.28
   9  -4  -6    0.45    0.46
   9   4   6    0.50    0.37
  -9   4  -6    0.01    0.33
  -9   4   6    0.12    0.27
   9   4  -6    0.22    0.35
   9  -4   6   -0.11    0.34
  -9  -4  -6    0.26    0.31
  10   4   6    6.57    0.73
 -10   4  -6    8.60    0.84
  10  -4  -6    9.89    1.06
 -10  -4   6    9.64    0.72
  10   4   6    8.54    0.82
  10  -4   6    8.44    0.83
  10   4  -6    7.98    0.91
 -10  -4  -6    8.29    0.81
 -10   4   6    8.48    0.79
 -11   4  -6    0.47    0.41
  11   4   6    0.85    0.47
  11  -4  -6    0.70    0.53
  11   4   6    1.29    0.53
 -11  -4   6    1.09    0.40
  11   4  -6    1.47    0.57
 -11   4   6    0.93    0.47
 -11  -4  -6    0.47    0.41
  11  -4   6    0.56    0.47
   0  -4  -7   -0.04    0.12
   0   4   7   -0.05    0.12
   0  -4  -7    0.04    0.18
   0  -4   7   -0.06    0.11
   0   4  -7   -0.03    0.05
   0   4  -7    0.26    0.22
   0  -4   7    0.14    0.13
   1  -4  -7    3.05    0.38
   1  -4  -7    2.64    0.25
  -1   4  -7    2.62    0.19
  -1   4  -7    2.89    0.41
   1   4   7    2.94    0.35
  -1  -4   7    3.10    0.31
  -1  -4   7    2.87    0.25
   1   4  -7    3.71    0.47
  -1  -4  -7    2.61    0.36
   1  -4   7    3.18    0.32
  -1  -4  -7    2.95    0.28
   1  -4   7    3.20    0.28
  -1   4   7    2.74    0.29
  -2   4  -7   14.17    0.78
   2  -4  -7   12.61    0.69
  -2   4  -7   12.71    0.51
   2   4   7   13.09    0.69
  -2  -4   7   12.83    0.58
  -2  -4   7   12.13    0.51
  -2  -4  -7   13.61    0.72
  -2  -4  -7   12.54    0.55
   2  -4   7   12.44    0.58
  -2   4   7   13.18    0.53
  -2   4   7   13.14    0.56
   2   4  -7   14.17    0.76
   2  -4   7   12.87    0.53
  -3  -4   7    0.48    0.17
   3  -4  -7    0.86    0.19
  -3   4  -7    0.50    0.18
  -3   4  -7    0.34    0.22
   3  -4  -7    0.80    0.24
   3   4   7    0.61    0.23
   3  -4   7    1.24    0.24
   3   4  -7    0.57    0.18
  -3   4   7    0.64    0.18
   3   4  -7    0.47    0.22
   3  -4   7    0.56    0.18
  -3  -4  -7    0.77    0.20
  -3  -4  -7    1.30    0.28
  -3   4   7    0.46    0.15
   4   4   7    3.92    0.35
  -4  -4   7    3.20    0.34
   4  -4  -7    3.90    0.44
  -4   4  -7    3.79    0.39
  -4   4  -7    3.70    0.46
   4   4   7    4.33    0.49
   4  -4  -7    4.00    0.45
  -4  -4  -7    3.44    0.38
  -4  -4  -7    3.79    0.42
  -4   4   7    4.41    0.32
  -4   4   7    3.32    0.31
   4  -4   7    3.19    0.36
   4   4  -7    3.14    0.41
   4  -4   7    3.15    0.36
   4   4  -7    3.99    0.38
   5  -4  -7    4.22    0.46
   5   4   7    4.15    0.49
   5  -4  -7    3.03    0.48
  -5   4  -7    4.19    0.45
   5   4   7    3.69    0.38
  -5  -4   7    3.64    0.38
  -5   4  -7    3.84    0.47
  -5  -4  -7    4.31    0.46
  -5   4   7    4.21    0.39
   5  -4   7    4.68    0.45
   5  -4   7    4.72    0.46
   5   4  -7    3.58    0.41
  -5   4   7    3.91    0.33
   5   4  -7    4.28    0.46
  -6  -4   7   11.05    0.62
   6  -4  -7   10.73    0.90
  -6   4  -7   11.50    0.72
   6  -4  -7   12.40    0.72
   6   4   7   12.77    0.80
   6   4   7   12.98    0.69
  -6   4  -7   11.71    0.68
  -6   4   7   12.41    0.62
  -6  -4  -7   11.31    0.73
  -6   4   7   11.56    0.53
   6   4  -7   11.63    0.66
   6   4  -7   11.12    0.68
   6  -4   7   12.22    0.67
   6  -4   7   11.97    0.69
  -7  -4   7    8.00    0.56
  -7   4  -7    7.75    0.66
   7  -4  -7    9.72    0.91
   7   4   7    8.39    0.74
   7   4   7    8.34    0.61
   7  -4  -7    7.11    0.62
   7   4  -7    7.86    0.69
  -7   4   7    7.64    0.53
  -7  -4  -7    7.16    0.67
   7  -4   7    7.24    0.65
   8   4   7    9.50    0.81
   8  -4  -7    7.34    0.64
  -8   4  -7    8.82    0.76
  -8  -4   7    7.58    0.63
   8  -4  -7    8.48    0.92
   8   4   7    8.15    0.70
  -8  -4  -7    7.47    0.73
  -8   4   7    8.67    0.68
   8  -4   7    8.51    0.73
   8   4  -7    7.78    0.76
   9  -4  -7    0.63    0.52
  -9   4  -7    1.93    0.47
  -9  -4   7    1.11    0.35
   9   4   7    0.96    0.42
   9  -4   7    1.34    0.43
  -9  -4  -7    1.49    0.43
  -9   4   7    1.06    0.35
   9   4  -7    1.21    0.46
 -10  -4   7   -0.10    0.29
  10   4   7    0.38    0.42
 -10   4  -7   -0.01    0.36
  10  -4  -7   -0.30    0.47
  10   4  -7    0.45    0.46
  10  -4   7   -0.17    0.36
 -10   4   7   -0.16    0.30
 -10  -4  -7    0.68    0.40
  11   4   7    3.55    0.66
  11  -4  -7    2.48    0.71
 -11   4  -7    4.15    0.67
  11  -4   7    3.33    0.60
 -11   4   7    4.35    0.64
  11   4  -7    3.89    0.75
   0   4   8    1.80    0.29
   0  -4   8    1.50    0.21
   0   4  -8    1.24    0.32
   0  -4  -8    1.91    0.23
   0  -4  -8    2.09    0.37
   0  -4   8    1.91    0.27
  -1   4  -8    1.75    0.17
  -1  -4   8    1.92    0.27
   1  -4  -8    1.57    0.22
   1  -4  -8    1.38    0.30
   1   4   8    0.72    0.23
  -1   4  -8    1.46    0.34
  -1  -4   8    1.40    0.21
   1  -4   8    1.63    0.26
   1   4  -8    1.37    0.33
  -1  -4  -8    1.46    0.22
  -1   4   8    1.94    0.27
   1  -4   8    1.83    0.23
  -1  -4  -8    2.40    0.39
   2  -4  -8    2.20    0.36
   2   4   8    1.88    0.33
  -2   4  -8    2.18    0.23
  -2  -4   8    2.20    0.29
  -2   4  -8    1.75    0.36
  -2  -4   8    1.95    0.24
   2  -4   8    3.05    0.34
  -2   4   8    2.72    0.28
   2  -4   8    2.05    0.24
  -2  -4  -8    2.28    0.38
  -2   4   8    2.39    0.29
  -2  -4  -8    2.47    0.28
   2   4  -8    2.36    0.40
  -3   4  -8   10.82    0.54
  -3   4  -8   10.73    0.71
   3   4   8   12.11    0.72
  -3  -4   8   11.72    0.59
   3  -4  -8   11.01    0.67
   3  -4   8   12.01    0.61
  -3   4   8   10.39    0.51
  -3  -4  -8   10.78    0.70
   3   4  -8    9.80    0.69
  -3  -4  -8   11.09    0.56
   3  -4   8   10.92    0.53
  -3   4   8   11.25    0.54
   3   4  -8   12.15    0.55
   4   4   8    0.43    0.25
   4  -4  -8    0.29    0.23
  -4  -4   8    0.68    0.22
  -4   4  -8    0.03    0.18
  -4   4  -8    0.19    0.22
  -4   4   8    0.56    0.20
  -4   4   8    0.24    0.17
   4   4  -8    0.51    0.25
  -4  -4  -8    0.44    0.22
   4  -4   8    0.26    0.22
  -4  -4  -8   -0.07    0.21
   4  -4   8    1.06    0.26
   4   4  -8    0.25    0.19
  -5   4  -8   -0.18    0.23
  -5  -4   8    0.14    0.18
  -5   4  -8    0.21    0.22
   5   4   8   -0.05    0.26
   5  -4  -8    0.21    0.25
  -5   4   8    0.30    0.17
   5  -4   8    0.16    0.22
   5  -4   8    0.20    0.23
   5   4  -8    0.20    0.22
  -5  -4  -8   -0.11    0.18
   5   4  -8    0.19    0.23
  -5   4   8    0.26    0.20
   6  -4  -8    1.14    0.34
   6   4   8    0.16    0.27
  -6  -4   8    0.80    0.27
  -6   4  -8    0.18    0.26
  -6   4  -8    0.57    0.27
   6  -4   8    0.47    0.26
   6   4  -8    0.62    0.28
  -6  -4  -8    0.80    0.30
   6  -4   8    1.49    0.35
  -6   4   8    0.42    0.20
   6   4  -8    0.31    0.25
  -6   4   8    0.39    0.23
  -7  -4   8    3.19    0.41
  -7   4  -8    3.63    0.49
   7   4   8    3.69    0.53
   7  -4  -8    3.06    0.45
   7  -4   8    2.87    0.46
  -7  -4  -8    2.86    0.46
  -7   4   8    3.38    0.42
   7   4  -8    1.80    0.40
   8   4   8    0.10    0.35
  -8   4  -8    0.61    0.33
  -8  -4   8    0.17    0.24
   8  -4  -8   -0.04    0.29
   8   4  -8    0.77    0.38
  -8  -4  -8    0.45    0.35
   8  -4   8    0.93    0.38
  -8   4   8    1.97    0.39
  -9  -4   8    2.68    0.44
   9   4   8    2.62    0.54
  -9   4  -8    1.94    0.47
   9  -4   8    1.89    0.45
  -9   4   8    2.47    0.48
   9   4  -8    2.73    0.58
  -9  -4  -8    1.74    0.44
  10   4   8    0.00    0.41
 -10   4  -8    0.48    0.41
 -10  -4   8    0.54    0.36
 -10   4   8    1.26    0.42
  10   4  -8    1.07    0.50
 -10  -4  -8   -0.10    0.34
  10  -4   8    0.64    0.45
   0  -4   9    0.13    0.14
   0  -4  -9   -0.11    0.14
   0  -4   9    0.10    0.17
   0  -4  -9    0.05    0.22
   0   4  -9    0.01    0.23
   0   4   9    0.22    0.20
   1  -4  -9    7.05    0.65
   1  -4  -9    6.52    0.38
  -1   4  -9    5.51    0.62
  -1  -4   9    6.12    0.37
   1   4   9    6.89    0.57
  -1  -4   9    6.26    0.46
   1   4  -9    5.98    0.64
  -1  -4  -9    5.44    0.39
  -1   4   9    5.90    0.44
  -1  -4  -9    5.86    0.61
   1  -4   9    6.37    0.37
   1  -4   9    6.43    0.46
  -2  -4   9    4.38    0.35
   2  -4  -9    4.05    0.52
   2   4   9    4.35    0.49
  -2   4  -9    3.75    0.52
  -2  -4   9    4.42    0.41
   2  -4   9    4.36    0.36
   2  -4   9    3.37    0.39
  -2   4   9    4.16    0.36
   2   4  -9    4.92    0.59
  -2   4   9    4.53    0.41
  -2  -4  -9    3.20    0.34
  -2  -4  -9    4.58    0.57
   3   4   9   10.36    0.69
  -3   4  -9   10.27    0.72
   3  -4  -9   10.15    0.70
  -3  -4   9   11.95    0.61
  -3   4  -9    9.60    0.51
   3  -4   9   10.61    0.52
  -3  -4  -9   10.33    0.58
   3   4  -9    9.86    0.51
   3  -4   9   10.60    0.63
  -3   4   9   10.72    0.56
  -3   4   9   10.18    0.52
   3   4  -9    9.71    0.70
  -3  -4  -9    8.35    0.75
   4  -4  -9    0.26    0.25
   4   4   9   -0.13    0.22
  -4   4  -9   -0.05    0.25
  -4   4  -9    0.06    0.20
  -4  -4   9   -0.01    0.18
  -4   4   9    0.03    0.18
  -4   4   9    0.08    0.16
   4   4  -9   -0.24    0.21
   4   4  -9    0.00    0.19
  -4  -4  -9   -0.01    0.23
   4  -4   9    0.33    0.24
   4  -4   9    0.35    0.21
  -4  -4  -9    0.17    0.21
  -5   4  -9    4.38    0.53
   5  -4  -9    4.36    0.51
   5   4   9    3.59    0.50
  -5  -4   9    4.98    0.48
  -5   4  -9    5.17    0.50
   5   4  -9    4.12    0.50
   5   4  -9    4.69    0.48
  -5   4   9    4.06    0.39
   5  -4   9    3.64    0.43
   5  -4   9    4.02    0.48
  -5  -4  -9    3.92    0.47
  -5   4   9    5.20    0.45
   6   4   9    5.54    0.61
  -6   4  -9    3.54    0.52
  -6   4  -9    5.53    0.54
  -6  -4   9    3.97    0.44
   6  -4  -9    4.05    0.52
  -6   4   9    3.90    0.44
   6   4  -9    3.79    0.49
   6   4  -9    5.79    0.58
   6  -4   9    4.33    0.51
  -6  -4  -9    3.67    0.50
   6  -4   9    4.04    0.50
  -7  -4   9    6.67    0.59
   7   4   9    6.53    0.71
   7  -4  -9    6.72    0.66
  -7   4  -9    5.86    0.61
   7   4  -9    6.49    0.66
  -7  -4  -9    8.47    0.73
  -7   4   9    7.31    0.61
   7  -4   9    6.37    0.62
  -8  -4   9    3.60    0.48
   8  -4  -9    2.85    0.49
  -8   4  -9    3.73    0.53
   8   4   9    3.15    0.54
   8  -4   9    2.77    0.50
  -8   4   9    2.58    0.45
   8   4  -9    4.04    0.59
  -8  -4  -9    2.65    0.50
  -9   4  -9    0.44    0.37
   9   4   9    1.13    0.47
  -9  -4   9   -0.02    0.27
  -9  -4  -9    0.48    0.36
   9   4  -9    0.17    0.43
   9  -4   9    0.03    0.37
  -9   4   9    0.43    0.35
 -10  -4   9    0.21    0.33
  10   4   9    0.21    0.42
 -10   4  -9    0.24    0.37
 -10  -4  -9    0.39    0.40
 -10   4   9   -0.13    0.35
  10  -4   9   -0.05    0.39
  10   4  -9    0.25    0.44
   0  -4 -10   21.44    0.79
   0   4 -10   22.84    1.18
   0  -4 -10   22.77    1.13
   0  -4  10   21.60    0.75
   0  -4  10   20.99    0.90
   0   4  10   22.15    0.94
  -1  -4  10    3.77    0.41
   1  -4 -10    4.17    0.54
   1   4  10    4.55    0.49
   1  -4 -10    4.49    0.38
  -1   4 -10    3.42    0.54
  -1  -4  10    3.99    0.34
   1  -4  10    3.53    0.42
   1   4 -10    3.67    0.55
  -1  -4 -10    3.80    0.37
   1  -4  10    3.72    0.34
  -1  -4 -10    4.00    0.57
  -1   4  10    3.75    0.42
  -2  -4  10   27.22    1.04
  -2  -4  10   26.25    0.90
   2   4  10   26.50    1.14
  -2   4 -10   31.90    1.37
   2  -4 -10   27.91    1.25
  -2   4  10   25.87    1.01
   2  -4  10   28.72    1.09
   2   4 -10   29.04    0.93
  -2  -4 -10   27.97    1.32
   2  -4  10   27.47    0.91
  -2  -4 -10   27.91    0.97
  -2   4  10   27.23    0.93
   2   4 -10   27.93    1.32
  -3   4 -10    0.19    0.28
  -3  -4  10    0.07    0.20
   3   4  10    0.07    0.25
   3  -4 -10    0.37    0.27
   3   4 -10    0.16    0.27
  -3  -4 -10   -0.15    0.18
   3  -4  10    0.35    0.25
   3  -4  10    0.18    0.19
  -3   4  10    0.11    0.19
  -3   4  10    0.23    0.20
  -3  -4 -10   -0.18    0.24
   3   4 -10    0.01    0.18
  -4   4 -10   11.97    0.84
   4   4  10   14.17    0.87
  -4  -4  10   14.67    0.73
   4  -4 -10   13.67    0.83
   4  -4  10   14.68    0.69
  -4  -4 -10   12.28    0.86
  -4  -4 -10   12.71    0.70
   4   4 -10   12.86    0.84
  -4   4  10   13.77    0.65
   4  -4  10   12.77    0.75
   4   4 -10   12.91    0.66
  -4   4  10   14.58    0.68
   5  -4 -10    0.05    0.28
  -5  -4  10   -0.14    0.18
  -5   4 -10   -0.18    0.26
   5   4  10    0.31    0.33
   5  -4  10    0.03    0.26
   5   4 -10    0.19    0.23
   5   4 -10    0.23    0.28
  -5  -4 -10   -0.49    0.18
  -5   4  10   -0.03    0.19
   5  -4  10    0.06    0.24
  -5   4  10    0.07    0.20
   6  -4 -10   28.24    1.24
   6   4  10   28.38    1.30
  -6   4 -10   28.52    1.14
  -6   4 -10   28.64    1.29
  -6  -4  10   28.57    1.14
   6   4 -10   29.34    1.18
   6  -4  10   28.32    1.14
   6   4 -10   28.24    1.25
  -6  -4 -10   26.20    1.19
  -6   4  10   26.39    1.04
   7  -4 -10    3.11    0.53
  -7   4 -10    3.91    0.52
  -7  -4  10    2.84    0.45
   7   4  10    2.40    0.50
   7  -4  10    3.21    0.47
   7   4 -10    2.94    0.50
  -7  -4 -10    2.80    0.48
  -7   4  10    2.63    0.41
  -8   4 -10   21.12    1.06
   8  -4 -10   21.02    1.09
   8   4  10   22.13    1.17
  -8  -4  10   19.43    0.99
  -8  -4 -10   19.67    1.09
   8  -4  10   20.68    1.03
  -8   4  10   21.03    1.01
   8   4 -10   22.11    1.18
   9   4  10    0.29    0.41
  -9  -4  10    0.19    0.30
  -9   4 -10    0.22    0.37
  -9   4  10   -0.10    0.33
  -9  -4 -10    0.05    0.35
   9   4 -10   -0.38    0.42
   9  -4  10    0.07    0.38
   0  -4 -11    0.22    0.18
   0  -4  11    0.01    0.16
   0   4 -11   -0.27    0.26
   0  -4 -11   -0.10    0.26
   0  -4  11    0.06    0.20
   0   4  11    0.05    0.22
   1   4  11   50.48    1.73
   1  -4 -11   50.88    1.46
   1  -4 -11   53.16    1.97
  -1   4 -11   52.58    2.01
  -1  -4  11   49.32    1.42
  -1  -4  11   51.64    1.66
  -1  -4 -11   55.92    2.04
  -1  -4 -11   51.33    1.50
   1   4 -11   49.95    1.99
   1  -4  11   51.29    1.68
  -1   4  11   50.57    1.64
   2   4  11    0.13    0.27
  -2   4 -11    1.40    0.43
   2  -4 -11    0.71    0.35
  -2  -4  11    0.71    0.26
   2   4 -11    0.40    0.33
  -2   4  11    0.15    0.21
  -2  -4 -11    0.35    0.21
   2  -4  11   -0.03    0.23
  -2  -4 -11    0.15    0.32
  -2   4  11    0.91    0.25
   2   4 -11    0.71    0.22
  -3   4 -11   23.46    1.20
  -3  -4  11   20.20    0.93
   3   4  11   21.03    1.07
   3  -4 -11   20.75    1.11
  -3   4  11   22.23    0.85
   3  -4  11   20.44    1.00
  -3   4  11   20.78    0.90
   3   4 -11   23.62    1.20
   3   4 -11   22.44    0.86
  -3  -4 -11   21.89    0.90
  -3  -4 -11   21.79    1.20
   4   4  11   -0.42    0.26
  -4  -4  11    0.03    0.22
  -4   4 -11   -0.21    0.26
   4  -4 -11   -0.02    0.30
  -4   4  11    0.07    0.22
  -4   4  11   -0.03    0.21
   4   4 -11    0.09    0.30
  -4  -4 -11   -0.10    0.21
   4   4 -11    0.00    0.21
  -4  -4 -11   -0.07    0.31
   4  -4  11    0.08    0.25
  -5  -4  11   25.41    1.07
   5   4  11   22.75    1.18
  -5   4 -11   25.63    1.25
   5  -4 -11   25.51    1.22
   5   4 -11   26.27    1.07
  -5   4  11   24.96    0.98
   5  -4  11   26.98    1.17
  -5  -4 -11   24.10    1.09
  -5   4  11   26.38    1.02
   5   4 -11   23.89    1.22
  -6   4 -11    0.19    0.33
   6  -4 -11    0.52    0.33
   6   4  11    0.27    0.35
  -6  -4  11    0.23    0.26
  -6   4  11    0.43    0.28
  -6  -4 -11   -0.01    0.30
   6   4 -11    0.38    0.34
   6   4 -11    0.10    0.32
   7   4  11   19.87    1.13
   7  -4 -11   18.18    1.03
  -7  -4  11   18.79    0.97
  -7  -4 -11   18.25    1.03
  -7   4  11   17.61    0.90
   7   4 -11   20.63    1.06
  -8  -4  11    0.56    0.32
   8  -4 -11    0.58    0.38
   8   4  11    1.08    0.47
  -8  -4 -11    0.52    0.38
   9   4  11   28.71    1.38
  -9  -4  11   25.51    1.21
  -9  -4 -11   25.08    1.29
   0  -4 -12   67.87    1.84
   0   4  12   66.10    2.08
   0  -4 -12   67.49    2.43
   0   4 -12   63.28    2.41
   0  -4  12   65.48    2.05
   1  -4 -12    1.21    0.42
   1  -4 -12    2.36    0.33
  -1  -4  12    1.52    0.35
   1   4  12    1.80    0.40
  -1   4 -12    1.27    0.43
  -1  -4 -12    2.69    0.57
  -1   4  12    1.88    0.36
  -1  -4 -12    1.55    0.30
   1   4 -12    1.44    0.45
   1  -4  12    2.57    0.41
  -2  -4  12   36.81    1.37
   2   4  12   36.55    1.48
  -2   4 -12   38.42    1.67
   2  -4 -12   39.11    1.66
  -2  -4 -12   37.25    1.25
  -2   4  12   37.44    1.35
   2  -4  12   39.67    1.47
  -2  -4 -12   34.84    1.66
   2   4 -12   37.90    1.69
  -2   4  12   35.74    1.20
   3   4  12    0.41    0.32
   3  -4 -12    0.84    0.36
  -3   4 -12    0.18    0.32
  -3  -4  12    0.41    0.26
  -3   4  12    0.15    0.24
   3  -4  12    0.02    0.30
   3   4 -12    0.10    0.32
  -3   4  12    0.07    0.22
  -3  -4 -12    0.27    0.24
  -3  -4 -12    0.16    0.36
   4   4  12   49.22    1.83
   4  -4 -12   46.72    1.86
  -4  -4  12   46.13    1.63
  -4   4 -12   49.34    1.93
  -4  -4 -12   48.03    1.59
  -4   4  12   49.15    1.50
   4   4 -12   46.37    1.91
  -4   4  12   48.67    1.59
   4  -4  12   49.33    1.76
   5  -4 -12   -0.08    0.29
  -5   4 -12   -0.08    0.34
  -5  -4  12   -0.01    0.25
   5   4  12    0.28    0.36
   5   4 -12   -0.14    0.32
   5  -4  12   -0.26    0.31
  -5   4  12    0.44    0.27
  -5  -4 -12   -0.12    0.26
  -5   4  12   -0.16    0.23
  -6   4 -12   34.22    1.52
  -6  -4  12   32.69    1.32
   6  -4 -12   30.77    1.46
   6   4  12   32.81    1.46
  -6  -4 -12   32.07    1.35
   6   4 -12   33.43    1.49
   7   4  12    3.24    0.59
   7  -4 -12    3.05    0.58
  -7  -4  12    2.61    0.46
  -7  -4 -12    2.11    0.49
  -8  -4  12   21.55    1.11
   8  -4 -12   22.09    1.20
   8   4  12   23.03    1.24
  -8  -4 -12   23.35    1.20
   0   4 -13    0.54    0.37
   0  -4  13   -0.12    0.24
   0  -4 -13    0.41    0.40
   0   4  13    0.39    0.31
   0  -4 -13   -0.17    0.20
   1  -4 -13   71.21    2.60
   1   4  13   69.65    2.28
  -1  -4  13   68.57    2.20
  -1   4 -13   73.19    2.63
  -1   4  13   70.10    2.19
  -1  -4 -13   72.06    2.64
   1   4 -13   70.04    2.62
  -1  -4 -13   70.29    1.99
   1  -4  13   73.67    2.28
  -1   4  13   70.32    1.98
   2   4  13    7.03    0.72
  -2  -4  13    8.02    0.70
  -2   4 -13    9.24    0.93
   2  -4 -13    8.50    0.88
  -2  -4 -13    9.62    0.97
   2  -4  13    8.33    0.76
  -2  -4 -13    8.89    0.58
  -2   4  13    9.09    0.57
  -2   4  13    7.86    0.67
   2   4 -13    9.96    1.00
   3  -4 -13   74.44    2.66
  -3   4 -13   78.96    2.72
  -3  -4  13   74.41    2.34
   3   4  13   70.74    2.47
   3  -4  13   78.06    2.46
  -3  -4 -13   81.48    2.79
   3   4 -13   78.90    2.78
  -3   4  13   80.62    2.32
  -3  -4 -13   75.07    2.19
  -4  -4  13    1.78    0.40
   4   4  13    1.55    0.45
   4  -4 -13    1.59    0.48
  -4   4 -13    0.90    0.41
  -4   4  13    1.26    0.34
   4   4 -13    1.33    0.45
   4  -4  13    0.66    0.41
  -4  -4 -13    0.70    0.34
  -5  -4  13   72.53    2.24
   5  -4 -13   71.23    2.49
   5   4  13   66.37    2.36
  -5   4 -13   69.44    2.48
  -5  -4 -13   68.16    2.17
   5   4 -13   67.98    2.48
   5  -4  13   67.30    2.31
  -5   4  13   72.60    2.15
  -6  -4  13    1.93    0.43
   6  -4 -13    1.56    0.48
   6   4  13    1.58    0.49
  -6  -4 -13    2.24    0.46
   6   4 -13    2.05    0.53
   7  -4 -13   39.23    1.74
   7   4  13   44.42    1.79
  -7  -4  13   42.75    1.62
  -7  -4 -13   41.46    1.66
   0  -4 -14   73.50    2.12
   0  -4 -14   80.02    2.88
   0   4 -14   76.94    2.85
   0  -4  14   78.01    2.46
   0   4  14   78.69    2.45
   1   4  14    0.41    0.35
  -1  -4  14    0.08    0.28
  -1   4 -14   -0.14    0.35
   1  -4 -14    0.37    0.38
   1   4 -14    0.01    0.40
  -1  -4 -14   -0.60    0.33
   1  -4  14   -0.20    0.30
  -1  -4 -14    0.17    0.25
  -1   4  14    0.39    0.31
   2  -4 -14   76.07    2.75
  -2  -4  14   72.68    2.34
  -2   4 -14   78.74    2.79
   2   4  14   70.64    2.44
  -2  -4 -14   74.26    2.78
  -2   4  14   72.24    2.31
   2  -4  14   76.06    2.46
  -2  -4 -14   76.42    2.16
   2   4 -14   77.03    2.85
  -3  -4  14    0.36    0.30
   3  -4 -14    0.15    0.36
  -3   4 -14    0.14    0.39
   3   4  14   -0.28    0.32
  -3   4  14    0.16    0.29
   3  -4  14    0.07    0.35
  -3  -4 -14    0.65    0.47
  -3  -4 -14    0.09    0.25
   3   4 -14    0.08    0.37
  -4  -4  14   69.01    2.28
  -4   4 -14   76.09    2.65
   4   4  14   70.83    2.48
   4  -4 -14   68.73    2.58
   4  -4  14   74.43    2.46
  -4   4  14   73.00    2.25
   4   4 -14   74.30    2.72
  -4  -4 -14   70.42    2.18
   5  -4 -14    0.60    0.42
  -5   4 -14    0.35    0.42
  -5  -4  14    0.16    0.35
   5   4  14    0.26    0.40
   5  -4  14    0.24    0.41
  -5   4  14   -0.28    0.29
  -5  -4 -14    0.21    0.33
   5   4 -14    0.61    0.43
   6  -4 -14   59.20    2.28
  -6  -4  14   57.92    2.03
   6   4  14   60.27    2.23
  -6  -4 -14   58.06    2.02
   6   4 -14   62.20    2.32
   0  -4  15    0.19    0.36
   0   4 -15   -0.08    0.39
   0  -4 -15    0.01    0.42
   0   4  15    0.15    0.37
  -1  -4  15   71.30    2.37
   1   4  15   74.79    2.46
   1  -4 -15   72.16    2.78
  -1   4 -15   73.98    2.80
  -1   4  15   72.54    2.36
   1   4 -15   70.84    2.82
   1  -4  15   68.00    2.38
  -1  -4 -15   73.75    2.79
   2  -4 -15    3.52    0.70
  -2  -4  15    4.85    0.61
   2   4  15    5.16    0.72
  -2   4 -15    4.32    0.75
  -2   4  15    4.07    0.57
   2  -4  15    4.49    0.65
  -2  -4 -15    4.61    0.80
   2   4 -15    5.18    0.83
  -3  -4  15   51.16    1.89
   3   4  15   48.22    2.00
  -3   4 -15   50.88    2.20
   3  -4 -15   51.76    2.21
   3  -4  15   54.69    2.05
  -3  -4 -15   58.92    2.31
  -3   4  15   50.96    1.84
   3   4 -15   54.48    2.33
   4  -4 -15    1.08    0.50
  -4  -4  15    0.20    0.34
  -4   4 -15    0.96    0.48
   4   4  15    1.10    0.49
   4  -4  15    0.77    0.46
  -4  -4 -15    0.39    0.35
   4   4 -15    0.68    0.48
  -4   4  15    0.82    0.37
  -5   4 -15   71.09    2.63
  -5   4  15   72.47    2.28
   5   4 -15   69.60    2.67
   5  -4  15   68.05    2.46
  -5  -4 -15   71.54    2.27
   0  -4  16   78.23    2.59
   0   4  16   74.14    2.54
   0  -4 -16   71.41    2.90
   0   4 -16   80.96    3.05
   1   4  16    3.53    0.62
  -1   4 -16    5.43    0.87
   1  -4 -16    4.81    0.82
  -1  -4  16    5.07    0.68
   1   4 -16    5.92    0.92
  -1   4  16    4.57    0.63
  -1  -4 -16    3.89    0.78
   1  -4  16    4.66    0.70
   2   4  16   58.39    2.27
   2  -4 -16   60.76    2.55
  -2  -4  16   60.36    2.19
  -2   4 -16   64.67    2.57
  -2   4  16   60.24    2.15
   2   4 -16   65.48    2.70
   2  -4  16   63.95    2.31
  -2  -4 -16   64.17    2.58
  -3   4 -16    4.94    0.78
  -3   4  16    3.75    0.59
  -3  -4 -16    4.10    0.79
   3  -4  16    3.87    0.67
   0  -5   0    0.10    0.08
   0  -5   0   -0.01    0.06
   0  -5   0   -0.09    0.08
   0  -5   0   -0.05    0.06
  -1  -5   0    0.11    0.09
  -1   5   0    0.52    0.10
  -1  -5   0    0.28    0.08
   1  -5   0    0.13    0.08
   1  -5   0    0.51    0.15
   1  -5   0    0.06    0.08
  -1  -5   0   -0.05    0.07
  -1  -5   0    0.09    0.10
   2  -5   0   32.02    0.87
  -2   5   0   29.77    0.84
   2   5   0   32.63    0.93
  -2  -5   0   30.93    0.91
  -2  -5   0   31.70    0.83
  -2  -5   0   30.15    0.91
  -2   5   0   31.48    0.74
   2   5   0   30.95    0.84
   3  -5   0    0.24    0.14
   3   5   0    0.66    0.14
  -3   5   0    0.16    0.11
   3   5   0   -0.13    0.10
  -3  -5   0    0.07    0.12
  -3  -5   0    0.10    0.11
   3  -5   0   -0.14    0.12
   4   5   0   57.44    1.56
   4  -5   0   57.34    1.66
   4   5   0   61.32    1.48
  -4   5   0   58.54    1.55
  -4  -5   0   59.61    1.60
   4  -5   0   57.21    1.65
  -4  -5   0   60.98    1.64
   5  -5   0    0.02    0.18
  -5   5   0    0.33    0.17
  -5  -5   0    0.17    0.16
  -5  -5   0    0.38    0.18
   5  -5   0    0.07    0.15
   5   5   0   -0.09    0.15
  -6   5   0   15.44    0.70
   6   5   0   15.18    0.74
  -6  -5   0   15.02    0.71
   6  -5   0   15.38    0.69
  -6  -5   0   15.93    0.78
   6  -5   0   16.29    0.83
  -7  -5   0    0.35    0.25
   7   5   0    0.31    0.27
  -7  -5   0    0.15    0.18
  -7   5   0    0.40    0.23
   7  -5   0   -0.08    0.25
   7  -5   0    0.19    0.20
  -8  -5   0   19.53    0.91
   8   5   0   19.78    1.02
  -8   5   0   18.48    0.92
   8  -5   0   22.70    1.12
  -8  -5   0   19.01    0.99
  -9   5   0   -0.06    0.26
   9   5   0   -0.09    0.31
   9  -5   0    0.28    0.35
  -9  -5   0   -0.09    0.29
  -9  -5   0   -0.16    0.20
  10  -5   0   -0.21    0.35
 -10  -5   0    0.41    0.36
 -10   5   0   -0.17    0.30
 -10  -5   0    0.13    0.27
  10   5   0    0.08    0.39
 -11  -5   0   -0.01    0.28
 -11   5   0    0.12    0.38
 -11  -5   0    0.49    0.41
  11   5   0    0.12    0.48
  11  -5   0    0.21    0.44
 -12  -5   0    5.03    0.73
   0  -5  -1    0.79    0.11
   0  -5   1    1.31    0.15
   0  -5  -1    0.99    0.16
   0  -5  -1    1.21    0.12
   0  -5   1    0.75    0.16
   0  -5   1    0.98    0.12
   0   5  -1    0.57    0.09
   0  -5  -1    0.69    0.13
  -1  -5   1    0.80    0.09
   1  -5  -1    0.69    0.14
  -1   5  -1    0.66    0.10
   1  -5  -1    0.65    0.11
  -1  -5   1    0.84    0.12
  -1  -5   1    1.05    0.14
  -1  -5  -1    0.52    0.10
   1  -5   1    0.74    0.13
  -1  -5  -1    0.75    0.14
  -1   5   1    0.79    0.13
  -1   5   1    0.68    0.11
   1  -5   1    0.65    0.15
  -1  -5  -1    0.65    0.11
   1  -5   1    0.80    0.09
  -1  -5  -1    0.96    0.16
   1   5  -1    0.68    0.16
   2  -5  -1   45.69    1.29
   2  -5  -1   46.90    1.16
  -2   5  -1   44.52    1.14
   2   5   1   45.38    1.13
  -2  -5   1   45.65    1.09
  -2  -5   1   44.85    1.15
  -2  -5   1   44.54    1.21
  -2  -5  -1   45.52    1.21
  -2  -5  -1   44.66    1.14
   2  -5   1   44.42    1.04
  -2   5   1   46.50    1.05
   2  -5   1   45.62    1.18
  -2  -5  -1   45.07    1.26
   2  -5   1   44.58    1.31
  -2   5   1   46.11    1.15
   2   5  -1   45.28    1.28
  -3   5  -1    7.70    0.36
  -3  -5   1    7.56    0.35
   3   5   1    7.41    0.36
   3  -5  -1    7.36    0.38
   3  -5  -1    7.60    0.40
  -3  -5   1    7.25    0.38
  -3  -5  -1    7.24    0.31
   3   5  -1    7.24    0.36
   3   5  -1    7.45    0.37
  -3  -5  -1    6.87    0.41
   3  -5   1    7.62    0.41
  -3  -5  -1    7.88    0.37
   3  -5   1    7.22    0.39
  -4  -5   1   11.42    0.51
  -4   5  -1   10.87    0.48
  -4  -5   1   10.71    0.50
   4   5   1   11.20    0.36
   4  -5  -1    9.81    0.50
   4  -5  -1    9.65    0.53
   4   5   1   11.72    0.51
  -4  -5  -1   10.18    0.52
   4   5  -1   10.59    0.40
  -4   5   1   10.37    0.47
   4  -5   1   10.38    0.52
   4  -5   1   10.84    0.55
   4   5  -1   10.58    0.49
  -4  -5  -1   10.65    0.52
   5   5   1    8.12    0.48
   5  -5  -1    8.94    0.47
  -5   5  -1    7.78    0.47
  -5  -5   1    7.51    0.45
   5  -5  -1    7.50    0.54
  -5  -5   1    7.52    0.49
  -5   5   1    7.94    0.45
   5  -5   1    8.17    0.47
   5   5  -1    7.40    0.47
   5  -5   1    7.47    0.51
  -5  -5  -1    7.10    0.50
  -5  -5  -1    7.92    0.50
   6   5   1   45.74    1.48
   6  -5  -1   45.85    1.59
   6  -5  -1   44.60    1.42
  -6  -5   1   47.44    1.44
  -6  -5   1   45.37    1.50
  -6   5  -1   50.21    1.47
   6  -5   1   46.97    1.44
   6   5  -1   47.51    1.48
  -6  -5  -1   44.88    1.51
   6  -5   1   47.58    1.57
  -6  -5  -1   47.15    1.47
  -6   5   1   44.14    1.39
   7   5   1    0.26    0.26
  -7  -5   1    0.41    0.24
  -7   5  -1    0.56    0.25
   7  -5  -1   -0.19    0.27
  -7  -5   1    0.45    0.22
   7  -5  -1    1.78    0.30
  -7   5   1    0.35    0.22
  -7  -5  -1    0.22    0.23
   7  -5   1    0.48    0.23
  -7  -5  -1    0.42    0.23
   7   5  -1    0.65    0.28
   7  -5   1    0.34    0.28
   8  -5  -1    3.27    0.56
  -8  -5   1    2.52    0.45
  -8   5  -1    2.85    0.45
  -8  -5   1    2.35    0.38
   8   5   1    2.20    0.43
   8  -5  -1    2.22    0.36
  -8  -5  -1    2.68    0.41
  -8  -5  -1    2.78    0.47
   8   5  -1    2.66    0.46
   8  -5   1    3.39    0.52
  -8   5   1    3.09    0.43
   9   5   1    0.13    0.36
  -9   5  -1    0.21    0.28
   9  -5  -1    0.02    0.35
  -9  -5   1   -0.18    0.29
  -9  -5   1   -0.04    0.24
  -9   5   1    0.41    0.29
  -9  -5  -1   -0.06    0.22
   9   5  -1   -0.11    0.33
  -9  -5  -1    0.15    0.29
   9  -5   1    0.15    0.34
 -10  -5   1    7.94    0.80
 -10  -5   1    6.86    0.66
 -10   5  -1    7.05    0.75
  10  -5  -1    6.32    0.80
  10   5   1    7.65    0.83
 -10  -5  -1    8.02    0.79
  10  -5   1    6.52    0.80
 -10  -5  -1    7.19    0.69
 -10   5   1    6.09    0.68
  10   5  -1    6.25    0.78
 -11  -5   1    0.27    0.36
  11  -5  -1    0.05    0.41
 -11   5  -1    0.10    0.38
 -11  -5   1    0.29    0.32
  11   5   1    0.16    0.47
  11  -5   1    0.14    0.43
 -11   5   1    0.12    0.38
 -11  -5  -1    0.01    0.29
  11   5  -1    0.57    0.49
 -11  -5  -1    0.03    0.38
 -12  -5   1    1.30    0.53
 -12  -5  -1    1.78    0.56
   0  -5  -2   -0.04    0.06
   0  -5   2   -0.01    0.08
   0  -5  -2   -0.04    0.09
   0  -5  -2    0.00    0.07
   0   5  -2    0.07    0.12
   0   5   2    0.19    0.12
   0  -5   2   -0.01    0.07
   0   5  -2   -0.03    0.05
  -1   5  -2   12.43    0.37
   1  -5  -2   11.11    0.36
   1  -5  -2   11.00    0.47
  -1  -5   2   11.77    0.31
  -1  -5   2   11.29    0.40
  -1  -5   2   11.26    0.42
  -1   5  -2   10.85    0.52
   1  -5   2   12.02    0.37
   1  -5   2   11.55    0.42
  -1  -5  -2   10.90    0.40
  -1  -5  -2   10.98    0.35
  -1   5   2   10.85    0.39
  -1  -5  -2   11.19    0.44
  -1  -5  -2   11.38    0.50
  -1   5   2   12.05    0.42
   1   5  -2   10.72    0.51
   2   5   2    8.45    0.32
  -2  -5   2    8.90    0.29
  -2  -5   2    8.15    0.37
  -2   5  -2    8.27    0.34
   2  -5  -2    8.70    0.34
  -2  -5   2    8.39    0.35
   2  -5  -2    8.21    0.41
  -2   5  -2    8.23    0.44
  -2   5   2    8.81    0.29
  -2  -5  -2    8.52    0.36
  -2  -5  -2    8.38    0.35
   2  -5   2    8.57    0.28
  -2   5   2    8.54    0.36
   2   5  -2    9.65    0.46
  -2  -5  -2    7.93    0.43
   3  -5  -2   25.93    0.82
  -3   5  -2   24.85    0.90
  -3  -5   2   25.95    0.83
   3  -5  -2   25.52    0.87
  -3  -5   2   25.92    0.74
   3   5   2   25.96    0.78
  -3   5  -2   26.77    0.80
   3   5  -2   25.77    0.85
  -3   5   2   26.13    0.78
   3   5  -2   26.12    0.79
  -3  -5  -2   26.60    0.75
  -3  -5  -2   25.49    0.81
  -3   5   2   26.18    0.64
   3  -5   2   25.30    0.65
  -3  -5  -2   26.74    0.91
  -4   5  -2    8.36    0.47
   4   5   2    8.82    0.44
  -4  -5   2    8.16    0.43
   4  -5  -2    8.61    0.49
  -4  -5   2    8.40    0.44
  -4   5  -2    8.54    0.43
   4  -5  -2    9.23    0.47
  -4  -5  -2    8.27    0.30
  -4   5   2    8.63    0.26
   4   5  -2    8.16    0.43
  -4  -5  -2    8.09    0.47
   4  -5   2    7.96    0.28
   4   5  -2    8.80    0.39
   4  -5   2    9.26    0.50
  -4   5   2    7.96    0.42
   4  -5   2    8.03    0.47
  -4  -5  -2    8.48    0.49
   5  -5  -2   41.31    1.35
  -5   5  -2   46.70    1.40
  -5   5  -2   45.25    1.34
  -5  -5   2   41.79    1.35
   5  -5  -2   44.31    1.46
   5   5   2   45.40    1.36
  -5  -5   2   43.74    1.33
  -5  -5  -2   46.32    1.43
  -5  -5  -2   41.61    1.38
   5   5  -2   45.47    1.21
   5  -5   2   45.61    1.44
  -5   5   2   45.58    1.30
   5   5  -2   45.54    1.35
   5  -5   2   44.95    1.39
  -6   5  -2    0.21    0.18
  -6  -5   2    0.34    0.22
  -6  -5   2    0.49    0.20
   6  -5  -2    0.64    0.21
   6   5   2    0.00    0.20
   6  -5  -2    0.46    0.25
  -6   5  -2    0.41    0.21
   6   5  -2    0.59    0.23
  -6  -5  -2    0.51    0.25
  -6   5   2    0.41    0.19
   6  -5   2    0.41    0.26
  -6  -5  -2    0.04    0.18
  -7   5  -2   23.73    1.00
   7   5   2   21.82    1.00
  -7  -5   2   23.10    0.94
  -7  -5   2   24.34    1.05
   7  -5  -2   26.11    1.19
   7  -5  -2   22.33    0.91
  -7   5  -2   23.06    0.92
   7  -5   2   23.08    1.07
  -7   5   2   23.28    0.94
  -7  -5  -2   21.93    0.98
   7   5  -2   23.97    1.02
  -7  -5  -2   23.91    1.06
  -8  -5   2    0.21    0.26
   8   5   2    0.34    0.30
  -8   5  -2    0.07    0.24
  -8  -5   2   -0.10    0.21
   8  -5  -2    0.00    0.22
   8  -5  -2   -0.19    0.30
  -8  -5  -2   -0.35    0.18
  -8  -5  -2   -0.14    0.26
   8   5  -2    0.02    0.27
  -8   5   2    0.08    0.24
   8  -5   2   -0.37    0.25
  -9  -5   2    3.65    0.56
  -9  -5   2    3.83    0.50
  -9   5  -2    3.92    0.54
   9   5   2    4.04    0.59
   9  -5  -2    3.90    0.66
  -9  -5  -2    4.14    0.56
  -9  -5  -2    3.95    0.52
  -9   5   2    4.21    0.54
   9   5  -2    4.42    0.60
   9  -5   2    4.05    0.59
 -10   5  -2   -0.11    0.32
  10  -5  -2    0.01    0.39
  10   5   2    0.26    0.39
 -10  -5   2    0.62    0.31
 -10  -5   2   -0.21    0.31
 -10  -5  -2    0.15    0.33
 -10   5   2    0.00    0.33
  10   5  -2   -0.36    0.34
  10  -5   2   -0.02    0.38
 -10  -5  -2   -0.05    0.27
 -11  -5   2    8.10    0.87
 -11   5  -2   10.66    0.98
 -11  -5   2    7.77    0.76
  11   5   2   10.88    1.04
  11  -5  -2    7.70    0.93
 -11   5   2    7.91    0.82
 -11  -5  -2    8.96    0.87
  11   5  -2    7.50    0.88
  11  -5   2    8.58    0.91
 -11  -5  -2    9.41    0.85
  12   5   2    0.95    0.60
 -12  -5  -2    1.03    0.48
   0  -5   3   88.98    2.11
   0  -5   3   89.16    2.08
   0   5   3   86.77    2.23
   0  -5  -3   85.83    2.26
   0   5  -3   86.56    2.39
   0   5  -3   89.43    1.94
   0  -5  -3   92.13    1.96
   0  -5  -3   89.82    2.07
  -1   5  -3    4.27    0.34
   1  -5  -3    4.54    0.25
  -1   5  -3    4.77    0.21
   1  -5  -3    4.70    0.20
  -1  -5   3    4.26    0.26
   1   5   3    4.80    0.40
  -1  -5   3    5.09    0.27
   1  -5  -3    4.77    0.31
   1   5   3    4.55    0.20
   1  -5   3    4.42    0.23
  -1   5   3    5.38    0.27
   1   5  -3    4.86    0.14
  -1  -5  -3    4.71    0.26
   1   5  -3    4.29    0.40
  -1   5   3    4.70    0.25
  -1  -5  -3    5.06    0.29
   1  -5   3    4.62    0.26
  -2  -5   3   97.87    2.10
   2  -5  -3   96.05    2.49
   2   5   3   98.47    2.21
  -2  -5   3   95.23    2.34
  -2  -5   3   95.93    2.27
  -2   5  -3   96.00    2.57
  -2   5  -3   96.71    2.23
   2  -5  -3   94.05    2.21
   2  -5   3   98.06    2.29
   2  -5   3   93.24    2.23
  -2  -5  -3   93.70    2.27
  -2  -5  -3   97.69    2.39
  -2   5   3   98.29    2.24
   2   5  -3   96.87    2.57
  -2   5   3   95.67    2.25
   3  -5  -3    6.05    0.38
  -3  -5   3    6.26    0.35
   3  -5  -3    6.57    0.35
  -3  -5   3    6.77    0.29
  -3   5  -3    6.02    0.33
  -3   5  -3    5.64    0.41
   3   5   3    6.22    0.33
   3   5  -3    6.10    0.38
   3  -5   3    5.86    0.26
   3   5  -3    5.87    0.34
  -3  -5  -3    5.27    0.34
   3  -5   3    5.83    0.37
  -3   5   3    6.32    0.33
  -3  -5  -3    6.12    0.29
  -3  -5  -3    5.31    0.41
  -3   5   3    5.98    0.24
   4   5   3   52.78    1.45
  -4   5  -3   51.14    1.45
  -4  -5   3   51.84    1.47
   4  -5  -3   49.15    1.51
  -4   5  -3   52.23    1.58
  -4  -5   3   51.52    1.42
   4  -5  -3   52.02    1.54
   4   5  -3   51.69    1.47
   4  -5   3   52.42    1.30
  -4   5   3   54.13    1.26
   4   5  -3   50.66    1.44
   4  -5   3   56.11    1.54
  -4  -5  -3   52.77    1.50
  -4  -5  -3   55.75    1.35
  -4   5   3   52.17    1.41
  -4  -5  -3   55.23    1.62
   5  -5  -3    2.78    0.33
  -5   5  -3    3.07    0.35
  -5  -5   3    3.18    0.36
  -5   5  -3    2.42    0.31
   5  -5  -3    3.76    0.43
   5   5   3    2.42    0.32
  -5  -5   3    3.64    0.35
   5   5  -3    2.98    0.27
   5   5  -3    3.20    0.35
   5  -5   3    2.76    0.37
  -5  -5  -3    2.86    0.37
  -5  -5  -3    3.17    0.37
  -5   5   3    2.12    0.27
   6   5   3   50.99    1.60
  -6  -5   3   51.47    1.61
  -6   5  -3   50.92    1.58
   6  -5  -3   50.00    1.56
  -6   5  -3   52.58    1.60
   6  -5  -3   46.80    1.71
  -6  -5   3   52.39    1.56
  -6  -5  -3   51.10    1.66
  -6   5   3   51.22    1.50
  -6  -5  -3   52.69    1.67
   6  -5   3   50.27    1.65
   6   5  -3   52.82    1.60
   7   5   3    3.09    0.46
  -7  -5   3    3.82    0.48
  -7  -5   3    4.36    0.45
  -7   5  -3    2.96    0.43
  -7   5  -3    3.78    0.42
   7  -5  -3    3.35    0.38
   7  -5  -3    3.56    0.53
   7   5  -3    3.30    0.46
  -7  -5  -3    3.34    0.46
   7  -5   3    2.55    0.42
  -7   5   3    3.61    0.41
  -7  -5  -3    2.85    0.41
  -8   5  -3   26.07    1.14
   8  -5  -3   23.54    0.98
  -8  -5   3   24.29    1.03
   8   5   3   25.47    1.18
  -8  -5   3   25.17    1.15
   8  -5  -3   23.86    1.24
  -8   5   3   24.73    1.04
  -8  -5  -3   25.46    1.12
  -8  -5  -3   25.36    1.14
   8   5  -3   24.67    1.14
   8  -5   3   24.44    1.15
  -9   5  -3    4.04    0.57
   9   5   3    4.00    0.60
   9  -5  -3    3.19    0.59
  -9  -5   3    3.61    0.57
  -9  -5   3    4.77    0.52
  -9   5   3    4.12    0.53
  -9  -5  -3    3.29    0.51
  -9  -5  -3    3.34    0.52
   9  -5   3    4.64    0.62
   9   5  -3    3.36    0.56
  10   5   3   28.94    1.37
  10   5   3   30.61    1.48
  10  -5  -3   29.51    1.50
 -10  -5   3   27.82    1.36
 -10   5  -3   29.09    1.39
 -10  -5   3   27.02    1.22
  10   5  -3   26.30    1.36
  10  -5   3   27.05    1.34
 -10  -5  -3   29.76    1.34
 -10   5   3   26.90    1.26
 -10  -5  -3   31.42    1.39
 -11   5  -3    1.07    0.48
  11  -5  -3    1.06    0.54
  11   5   3    0.57    0.51
 -11  -5   3    0.86    0.38
  11   5   3    1.40    0.51
  11   5  -3    0.73    0.51
  11  -5   3    1.32    0.52
 -11  -5  -3    1.09    0.46
 -11   5   3    1.36    0.44
   0  -5  -4    0.04    0.05
   0  -5  -4   -0.05    0.09
   0   5   4   -0.04    0.11
   0   5  -4    0.07    0.06
   0  -5   4    0.24    0.10
   0  -5   4    0.12    0.10
   0  -5  -4    0.26    0.13
   0   5  -4    0.06    0.15
   1   5   4  312.53    6.54
   1   5   4  287.66    7.02
   1  -5  -4  305.12    7.25
  -1   5  -4  307.71    6.57
  -1  -5   4  311.26    6.67
  -1  -5   4  302.91    6.86
   1  -5  -4  303.08    6.64
  -1   5  -4  305.20    7.40
   1  -5  -4  312.06    6.53
   1   5  -4  290.64    7.38
   1  -5   4  309.25    6.82
  -1   5   4  309.98    6.86
  -1  -5  -4  305.42    6.66
  -1  -5  -4  302.94    7.20
   1  -5   4  308.44    6.68
   2  -5  -4    2.57    0.18
  -2  -5   4    2.48    0.23
  -2   5  -4    3.31    0.36
  -2  -5   4    2.51    0.10
   2  -5  -4    2.27    0.27
   2   5   4    2.84    0.34
   2   5   4    2.40    0.20
  -2  -5   4    2.51    0.24
  -2   5  -4    2.28    0.21
   2   5  -4    2.46    0.32
   2  -5   4    2.43    0.20
  -2   5   4    2.31    0.20
  -2   5   4    2.08    0.21
   2  -5   4    2.26    0.23
  -2  -5  -4    2.47    0.24
  -2  -5  -4    2.35    0.23
  -3  -5   4   99.35    2.55
   3  -5  -4  105.72    2.48
   3   5   4  103.32    2.77
   3   5   4  105.86    2.46
  -3   5  -4   98.68    2.78
  -3   5  -4  103.81    2.48
   3  -5  -4  102.62    2.72
  -3  -5   4  106.56    2.35
  -3   5   4  105.20    2.41
   3  -5   4  100.50    2.43
   3   5  -4  105.50    2.75
   3   5  -4  102.60    2.48
  -3  -5  -4  103.63    2.52
   3  -5   4  103.48    2.53
  -3   5   4  101.90    2.45
  -3  -5  -4  103.73    2.58
  -4   5  -4   -0.06    0.16
   4   5   4    0.28    0.16
   4  -5  -4    0.32    0.17
   4   5   4    0.67    0.25
  -4   5  -4    0.34    0.17
  -4  -5   4    0.24    0.15
  -4  -5   4    0.27    0.14
   4  -5  -4    0.34    0.18
  -4  -5  -4    1.01    0.22
  -4   5   4    0.13    0.14
   4  -5   4    0.22    0.18
  -4   5   4    0.27    0.10
   4   5  -4    0.35    0.16
  -4  -5  -4    0.19    0.11
   4   5  -4    0.41    0.18
   4  -5   4    0.30    0.12
  -5  -5   4   52.37    1.53
  -5   5  -4   53.31    1.56
  -5   5  -4   50.53    1.63
   5  -5  -4   50.06    1.65
  -5  -5   4   53.32    1.54
   5   5   4   53.78    1.56
   5  -5  -4   52.40    1.60
   5   5   4   51.24    1.69
   5  -5   4   51.56    1.39
   5   5  -4   49.90    1.49
  -5   5   4   52.75    1.48
  -5   5   4   54.39    1.31
   5  -5   4   53.98    1.62
  -5  -5  -4   52.43    1.62
   5   5  -4   52.67    1.54
   6   5   4    0.81    0.29
  -6  -5   4    1.30    0.27
   6  -5  -4    1.41    0.29
   6  -5  -4    0.73    0.32
  -6   5  -4    1.09    0.27
  -6  -5   4    1.06    0.30
  -6   5  -4    0.94    0.26
   6   5   4    1.40    0.32
  -6   5   4    1.20    0.25
   6   5  -4    1.03    0.27
  -6  -5  -4    1.20    0.31
   6  -5   4    0.61    0.28
  -7  -5   4   52.58    1.71
   7  -5  -4   48.23    1.58
   7  -5  -4   50.87    1.85
  -7   5  -4   51.58    1.65
   7   5   4   51.01    1.69
   7   5   4   50.39    1.73
  -7   5  -4   52.20    1.69
  -7  -5   4   48.31    1.57
   7  -5   4   48.03    1.68
  -7  -5  -4   47.60    1.68
  -7   5   4   51.70    1.56
   7   5  -4   50.54    1.67
  -8  -5   4    5.86    0.55
   8  -5  -4    5.59    0.52
   8   5   4    5.27    0.60
  -8  -5   4    5.73    0.64
   8  -5  -4    5.62    0.73
   8   5   4    5.73    0.63
  -8   5  -4    5.13    0.59
   8  -5   4    5.37    0.60
  -8   5   4    4.95    0.53
  -8  -5  -4    5.30    0.60
   8   5  -4    4.62    0.57
   9   5   4   83.43    2.56
  -9   5  -4   76.71    2.50
   9  -5  -4   83.97    2.73
   9   5   4   82.03    2.57
  -9  -5   4   78.66    2.36
  -9   5   4   74.81    2.34
   9   5  -4   77.94    2.51
   9  -5   4   77.54    2.47
  -9  -5  -4   76.22    2.44
 -10  -5   4   -0.04    0.26
  10  -5  -4    0.30    0.45
  10   5   4   -0.18    0.41
 -10   5  -4   -0.21    0.35
  10   5   4    0.05    0.39
  10  -5   4    0.41    0.37
  10   5  -4    0.47    0.42
 -10  -5  -4   -0.06    0.32
 -10   5   4   -0.21    0.32
  11  -5  -4   47.81    2.09
 -11  -5   4   49.91    1.82
 -11   5  -4   49.18    2.03
  11   5   4   47.86    2.00
  11   5   4   48.14    1.94
  11   5  -4   50.05    2.05
 -11  -5  -4   49.33    1.89
  11  -5   4   50.14    1.95
 -11   5   4   48.59    1.88
   0  -5  -5  422.38    8.89
   0  -5  -5  406.01    9.67
   0   5   5  407.26    8.69
   0  -5   5  405.55    9.15
   0   5   5  407.77    9.25
   0   5  -5  402.80    9.85
   0  -5   5  419.02    8.91
  -1  -5   5    6.17    0.33
  -1   5  -5    5.95    0.47
   1  -5  -5    5.48    0.39
  -1  -5   5    6.19    0.36
   1  -5  -5    6.20    0.32
   1  -5  -5    5.89    0.19
   1   5   5    5.68    0.41
  -1   5  -5    5.67    0.28
   1   5   5    6.10    0.22
   1  -5   5    5.37    0.32
  -1  -5  -5    5.78    0.33
  -1   5   5    5.85    0.33
   1  -5   5    5.53    0.32
  -1  -5  -5    4.91    0.36
   1   5  -5    6.49    0.48
  -2  -5   5  106.09    2.46
  -2  -5   5  101.81    2.55
  -2   5  -5  102.98    2.87
  -2   5  -5  103.11    2.46
   2  -5  -5  104.43    2.33
   2  -5  -5  103.28    2.75
   2   5   5  107.53    2.37
  -2  -5  -5  101.17    2.66
   2   5  -5  101.88    2.83
  -2   5   5  101.14    2.44
  -2   5   5  103.61    2.48
   2  -5   5  101.24    2.48
  -2  -5  -5  102.82    2.48
   2  -5   5  102.53    2.47
  -3  -5   5    6.96    0.28
  -3  -5   5    6.14    0.39
   3   5   5    6.35    0.36
   3   5   5    5.41    0.50
   3  -5  -5    6.79    0.36
  -3   5  -5    6.55    0.51
  -3   5  -5    6.52    0.39
   3  -5  -5    5.56    0.42
   3  -5   5    6.34    0.35
   3   5  -5    6.40    0.38
  -3  -5  -5    6.05    0.37
  -3  -5  -5    6.92    0.40
  -3   5   5    7.14    0.38
  -3   5   5    6.82    0.33
   3  -5   5    6.21    0.40
   3   5  -5    7.19    0.48
  -4   5  -5  122.60    3.41
   4  -5  -5  127.27    3.14
  -4  -5   5  117.08    2.98
  -4  -5   5  128.33    3.15
   4   5   5  123.93    3.37
   4  -5  -5  122.85    3.33
   4   5   5  133.88    3.09
  -4   5  -5  127.75    3.12
  -4   5   5  123.83    3.02
   4   5  -5  127.20    3.07
   4  -5   5  128.55    3.05
  -4  -5  -5  133.27    3.17
   4   5  -5  126.64    3.31
   4  -5   5  133.20    3.15
  -4   5   5  131.30    2.98
  -4  -5  -5  129.56    3.16
  -5   5  -5   -0.05    0.16
   5   5   5    0.24    0.20
   5   5   5    0.11    0.21
  -5  -5   5    0.05    0.17
   5  -5  -5    0.09    0.22
   5  -5  -5   -0.17    0.18
  -5  -5   5    0.09    0.14
  -5   5  -5   -0.09    0.18
  -5   5   5    0.18    0.17
   5   5  -5   -0.08    0.16
  -5   5   5    0.06    0.11
   5  -5   5    0.13    0.14
   5  -5   5   -0.19    0.17
   5   5  -5   -0.15    0.15
  -5  -5  -5    0.27    0.20
  -6   5  -5   52.88    1.68
  -6   5  -5   51.03    1.62
  -6  -5   5   49.82    1.54
   6   5   5   50.62    1.60
   6  -5  -5   49.35    1.59
   6   5   5   49.64    1.72
   6  -5  -5   47.49    1.72
   6   5  -5   50.48    1.58
  -6   5   5   48.80    1.48
   6  -5   5   48.19    1.61
  -6  -5  -5   47.77    1.64
   7   5   5    0.24    0.30
   7   5   5    0.96    0.33
   7  -5  -5   -0.02    0.21
   7  -5  -5   -0.03    0.33
  -7  -5   5    0.35    0.21
  -7   5  -5    0.43    0.28
  -7   5  -5    0.52    0.26
  -7  -5  -5   -0.09    0.22
   7   5  -5    0.41    0.28
   7  -5   5    0.31    0.27
  -7   5   5    0.41    0.25
   8  -5  -5   98.95    3.13
  -8   5  -5  105.59    3.00
   8   5   5  110.16    3.03
   8  -5  -5  101.62    2.88
   8   5   5  103.50    3.06
  -8  -5   5  103.77    2.85
  -8   5   5  102.08    2.79
  -8  -5  -5  106.84    2.99
   8   5  -5   97.35    2.92
   8  -5   5  103.08    2.94
   9   5   5    3.31    0.59
   9   5   5    1.98    0.51
  -9  -5   5    2.28    0.42
   9  -5  -5    2.96    0.63
  -9   5  -5    2.20    0.49
   9  -5   5    2.00    0.47
  -9  -5  -5    1.83    0.43
   9   5  -5    2.80    0.53
  -9   5   5    2.15    0.44
 -10  -5   5   62.59    2.06
  10   5   5   64.29    2.25
  10  -5  -5   65.11    2.43
  10   5   5   61.79    2.23
 -10   5  -5   65.33    2.30
  10   5  -5   59.24    2.22
  10  -5   5   61.68    2.14
 -10  -5  -5   61.15    2.13
 -10   5   5   56.62    2.02
  11  -5  -5    1.64    0.61
  11   5   5    1.88    0.56
 -11   5  -5    1.42    0.50
  11   5   5    1.21    0.52
 -11  -5   5    0.47    0.35
  11  -5   5    1.31    0.52
 -11  -5  -5    1.01    0.46
  11   5  -5    1.51    0.56
 -11   5   5    1.74    0.49
   0  -5   6    0.05    0.11
   0  -5  -6    0.02    0.14
   0  -5   6   -0.04    0.11
   0   5  -6   -0.12    0.17
   0  -5  -6   -0.04    0.11
   0   5   6    0.01    0.14
  -1   5  -6  160.30    3.53
  -1   5  -6  161.46    4.24
  -1  -5   6  162.81    3.81
   1   5   6  157.21    3.94
   1  -5  -6  156.07    4.07
  -1  -5   6  161.60    3.65
   1  -5  -6  161.53    3.65
  -1  -5  -6  159.81    4.06
  -1   5   6  161.01    3.79
  -1  -5  -6  164.16    3.67
   1  -5   6  159.48    3.77
   1  -5   6  156.72    3.65
   1   5  -6  152.95    4.20
   2   5   6    3.14    0.22
  -2   5  -6    3.23    0.28
  -2  -5   6    3.05    0.28
   2  -5  -6    3.39    0.18
  -2  -5   6    3.69    0.34
   2  -5  -6    2.38    0.33
   2   5   6    3.16    0.39
  -2   5  -6    2.56    0.40
  -2   5   6    2.78    0.26
  -2  -5  -6    2.93    0.29
  -2   5   6    2.83    0.27
   2  -5   6    3.79    0.31
   2   5  -6    3.49    0.41
  -2  -5  -6    3.43    0.36
   2  -5   6    2.99    0.29
   3  -5  -6  205.96    4.56
  -3   5  -6  207.82    4.68
   3  -5  -6  195.28    5.09
   3   5   6  204.72    4.58
  -3   5  -6  201.12    5.22
  -3  -5   6  200.72    4.79
   3   5   6  204.55    5.03
  -3  -5  -6  206.39    4.70
   3  -5   6  198.23    4.72
  -3   5   6  210.97    4.68
  -3   5   6  203.97    4.61
   3   5  -6  204.65    4.64
  -3  -5  -6  205.80    5.02
   3   5  -6  198.51    5.14
   3  -5   6  199.29    4.66
   4  -5  -6    0.06    0.17
   4  -5  -6    0.22    0.20
  -4  -5   6    0.11    0.16
   4   5   6   -0.08    0.15
   4   5   6    0.05    0.20
  -4   5  -6   -0.10    0.16
  -4   5  -6    0.21    0.22
  -4  -5  -6    0.12    0.16
   4  -5   6   -0.16    0.13
  -4   5   6   -0.02    0.11
  -4   5   6   -0.03    0.15
   4  -5   6   -0.12    0.17
   4   5  -6    0.03    0.17
   4   5  -6    0.16    0.17
  -4  -5  -6   -0.01    0.15
   5  -5  -6  191.81    4.92
  -5   5  -6  196.59    4.67
   5   5   6  199.55    4.92
  -5  -5   6  198.25    4.67
  -5   5  -6  197.44    5.04
   5   5   6  200.49    4.61
   5  -5  -6  181.44    4.69
  -5   5   6  197.98    4.46
  -5  -5  -6  191.63    4.68
   5  -5   6  192.34    4.59
   5  -5   6  189.66    4.63
   5   5  -6  192.52    4.58
  -5   5   6  188.46    4.49
   5   5  -6  192.34    4.86
   6  -5  -6    5.00    0.59
   6   5   6    5.43    0.54
  -6   5  -6    5.59    0.56
  -6  -5   6    5.49    0.48
  -6   5  -6    6.26    0.59
   6  -5  -6    5.37    0.51
   6   5   6    4.48    0.54
   6   5  -6    5.77    0.53
  -6   5   6    5.94    0.49
  -6  -5  -6    4.94    0.53
   6  -5   6    5.03    0.54
   7  -5  -6  111.50    3.10
   7   5   6  112.32    3.21
  -7  -5   6  115.40    3.00
   7  -5  -6  109.77    3.26
   7   5   6  117.65    3.09
  -7   5  -6  112.87    3.20
  -7   5  -6  107.70    3.08
   7  -5   6  108.98    3.04
  -7  -5  -6  112.51    3.11
   7   5  -6  111.91    3.06
  -7   5   6  110.17    2.90
   8  -5  -6    0.62    0.44
   8   5   6    0.68    0.38
   8   5   6    0.63    0.37
  -8  -5   6    0.86    0.29
   8  -5  -6    1.48    0.36
  -8   5  -6    0.36    0.31
   8   5  -6    0.69    0.34
  -8  -5  -6    0.69    0.34
  -8   5   6    0.81    0.30
   8  -5   6    0.70    0.37
  -9   5  -6   63.32    2.23
  -9  -5   6   67.95    2.12
   9   5   6   69.04    2.24
   9   5   6   70.15    2.31
   9  -5  -6   68.62    2.47
   9  -5   6   66.77    2.19
  -9  -5  -6   66.00    2.21
   9   5  -6   67.68    2.29
  -9   5   6   63.05    2.07
  10   5   6   -0.22    0.39
  10   5   6    0.13    0.41
  10  -5  -6    0.21    0.50
 -10   5  -6   -0.32    0.34
 -10  -5   6    0.31    0.32
  10  -5   6   -0.03    0.38
 -10  -5  -6    0.09    0.31
  10   5  -6    0.38    0.43
 -10   5   6    0.14    0.34
  11   5   6   50.25    1.96
 -11  -5   6   47.51    1.78
  11  -5  -6   52.52    2.19
 -11   5  -6   49.61    1.98
 -11   5   6   44.32    1.81
  11  -5   6   46.22    1.84
  11   5  -6   47.63    2.05
 -11  -5  -6   44.13    1.82
   0   5  -7   69.02    2.18
   0  -5   7   67.58    1.72
   0  -5  -7   67.76    1.74
   0  -5  -7   65.94    2.04
   0  -5   7   69.18    1.84
   0   5   7   68.03    1.90
   1  -5  -7    0.07    0.13
  -1  -5   7    0.25    0.15
   1  -5  -7    0.27    0.20
   1   5   7    0.16    0.19
  -1   5  -7    0.17    0.09
  -1   5  -7    0.10    0.23
  -1  -5   7    0.13    0.13
  -1  -5  -7    0.07    0.13
   1  -5   7   -0.05    0.13
   1   5  -7    0.14    0.20
  -1  -5  -7   -0.01    0.17
   1  -5   7    0.08    0.14
  -1   5   7    0.14    0.14
  -2  -5   7  168.50    4.01
  -2   5  -7  164.38    3.77
  -2   5  -7  168.59    4.45
  -2  -5   7  167.36    3.83
   2   5   7  162.74    4.18
   2  -5  -7  161.91    4.30
   2   5  -7  170.19    4.43
  -2  -5  -7  166.11    3.87
  -2  -5  -7  170.02    4.31
   2  -5   7  162.13    3.83
  -2   5   7  166.79    3.94
  -2   5   7  167.70    3.83
   2  -5   7  164.93    3.97
   3  -5  -7    0.52    0.22
  -3   5  -7    0.81    0.29
  -3   5  -7    0.38    0.18
   3   5   7    1.13    0.30
  -3  -5   7    0.99    0.22
  -3  -5  -7    1.00    0.26
   3  -5   7    0.73    0.20
   3  -5   7    1.04    0.22
  -3   5   7    0.76    0.19
  -3  -5  -7    1.24    0.24
  -3   5   7    0.68    0.18
   3   5  -7    0.66    0.26
   3   5  -7    1.31    0.23
  -4  -5   7  183.80    4.43
   4   5   7  187.82    4.68
  -4   5  -7  184.45    4.34
  -4   5  -7  176.17    4.80
   4  -5  -7  181.94    4.73
  -4  -5  -7  189.01    4.40
   4   5  -7  178.85    4.72
  -4   5   7  178.09    4.24
  -4   5   7  189.66    4.30
  -4  -5  -7  185.36    4.64
   4  -5   7  183.16    4.34
   4   5  -7  180.17    4.29
   4  -5   7  183.96    4.39
  -5  -5   7    0.68    0.23
  -5   5  -7    0.22    0.24
   5  -5  -7    0.25    0.25
   5   5   7    0.66    0.30
  -5   5  -7    0.56    0.23
   5   5  -7    0.42    0.22
   5   5  -7    0.54    0.25
   5  -5   7    0.52    0.26
  -5  -5  -7    0.87    0.27
  -5   5   7    0.87    0.20
   5  -5   7    0.67    0.24
  -5   5   7    0.49    0.20
  -6   5  -7  184.57    4.46
  -6   5  -7  183.33    4.78
   6   5   7  183.84    4.69
   6  -5  -7  161.95    4.53
  -6  -5   7  181.77    4.44
   6  -5  -7  182.36    4.70
  -6   5   7  181.14    4.31
   6   5  -7  186.65    4.63
   6   5  -7  179.44    4.42
  -6  -5  -7  175.26    4.49
   6  -5   7  178.42    4.45
   7   5   7    1.05    0.36
   7  -5  -7    1.06    0.34
  -7  -5   7    1.01    0.29
   7  -5  -7    1.05    0.42
  -7   5  -7    0.80    0.30
  -7   5  -7    0.70    0.33
   7  -5   7    0.83    0.33
  -7   5   7    1.32    0.31
  -7  -5  -7    1.03    0.33
   7   5  -7    1.49    0.39
   8   5   7   70.13    2.34
  -8  -5   7   70.21    2.14
  -8   5  -7   69.99    2.23
   8  -5  -7   70.06    2.45
   8  -5  -7   70.40    2.20
  -8  -5  -7   68.99    2.25
   8  -5   7   71.08    2.21
   8   5  -7   70.80    2.27
  -8   5   7   70.82    2.11
  -9  -5   7    0.58    0.32
  -9   5  -7    0.98    0.39
   9   5   7    0.83    0.44
  -9   5   7    0.54    0.34
   9  -5   7    0.90    0.38
  -9  -5  -7    0.72    0.37
   9   5  -7    0.65    0.42
 -10   5  -7   48.75    1.88
  10   5   7   51.31    1.94
 -10  -5   7   47.06    1.74
 -10   5   7   49.41    1.78
  10  -5   7   47.48    1.80
  10   5  -7   48.42    1.98
 -10  -5  -7   46.35    1.82
   0  -5  -8    0.00    0.18
   0   5  -8    0.04    0.21
   0  -5   8    0.35    0.17
   0   5   8    0.33    0.19
   0  -5   8    0.00    0.14
   0  -5  -8    0.13    0.15
  -1  -5   8  133.24    3.32
  -1   5  -8  137.15    3.77
  -1  -5   8  133.84    3.14
   1  -5  -8  129.42    3.63
   1  -5  -8  135.84    3.15
   1   5   8  134.97    3.45
   1   5  -8  133.43    3.75
  -1  -5  -8  131.18    3.65
  -1  -5  -8  134.81    3.18
   1  -5   8  132.34    3.31
  -1   5   8  133.12    3.32
   1  -5   8  131.58    3.14
  -2   5  -8    7.18    0.67
   2   5   8    6.22    0.56
   2  -5  -8    8.22    0.58
  -2  -5   8    6.88    0.40
  -2  -5   8    6.92    0.46
   2  -5   8    6.97    0.42
  -2  -5  -8    6.93    0.43
  -2   5   8    7.34    0.42
  -2  -5  -8    6.72    0.61
   2   5  -8    6.96    0.66
  -2   5   8    7.47    0.45
   2  -5   8    6.80    0.44
  -3   5  -8  170.65    3.93
  -3   5  -8  166.25    4.52
   3   5   8  167.17    4.33
  -3  -5   8  168.61    4.11
   3  -5  -8  165.61    4.43
   3   5  -8  167.33    3.94
   3  -5   8  168.65    4.10
   3  -5   8  164.20    3.95
  -3  -5  -8  170.13    4.44
  -3   5   8  170.09    3.93
  -3  -5  -8  167.84    4.00
  -3   5   8  168.86    4.02
   3   5  -8  168.51    4.50
  -4   5  -8    2.32    0.41
   4   5   8    2.72    0.43
  -4   5  -8    2.81    0.35
   4  -5  -8    2.36    0.39
  -4  -5   8    2.12    0.32
  -4  -5  -8    2.73    0.40
   4   5  -8    2.66    0.42
   4  -5   8    2.87    0.35
  -4  -5  -8    2.33    0.34
  -4   5   8    2.12    0.28
   4   5  -8    2.00    0.31
   4  -5   8    3.16    0.38
  -4   5   8    2.11    0.29
  -5   5  -8  147.60    3.56
  -5  -5   8  142.05    3.60
   5  -5  -8  143.70    3.87
   5   5   8  143.47    3.84
  -5   5  -8  141.23    3.92
   5   5  -8  140.74    3.53
  -5  -5  -8  142.30    3.63
   5  -5   8  142.82    3.61
   5   5  -8  139.45    3.82
  -5   5   8  136.04    3.43
  -5   5   8  143.28    3.44
   5  -5   8  138.44    3.54
   6  -5  -8    0.99    0.33
  -6   5  -8    1.00    0.31
  -6   5  -8    1.37    0.36
   6   5   8    1.09    0.39
  -6  -5   8    1.52    0.32
   6   5  -8    1.49    0.33
   6  -5   8    1.46    0.36
  -6   5   8    1.41    0.30
  -6  -5  -8    0.86    0.31
   6   5  -8    1.43    0.34
   7  -5  -8  118.64    3.25
  -7   5  -8  113.46    3.07
   7   5   8  113.46    3.27
  -7  -5   8  110.11    3.03
  -7  -5  -8  111.00    3.15
  -7   5   8  109.48    2.94
   7   5  -8  110.68    3.11
   7  -5   8  114.16    3.09
   8   5   8    5.87    0.69
  -8   5  -8    7.61    0.70
   8  -5  -8    5.43    0.60
  -8  -5   8    6.22    0.59
   8   5  -8    5.76    0.68
  -8   5   8    6.30    0.60
  -8  -5  -8    5.42    0.63
   8  -5   8    6.77    0.68
  -9   5  -8   60.70    2.06
   9   5   8   58.58    2.12
  -9  -5   8   60.38    1.98
   9  -5   8   59.26    2.02
  -9   5   8   58.61    1.95
  -9  -5  -8   59.63    2.08
   9   5  -8   58.98    2.13
 -10  -5   8    0.11    0.31
  10   5   8   -0.49    0.36
 -10   5  -8    0.12    0.37
 -10   5   8   -0.02    0.36
  10   5  -8   -0.02    0.42
  10  -5   8   -0.72    0.37
 -10  -5  -8   -0.24    0.31
   0  -5  -9  186.35    4.28
   0   5  -9  185.95    5.03
   0   5   9  183.16    4.55
   0  -5   9  186.04    4.26
   0  -5  -9  186.39    4.95
   0  -5   9  183.53    4.49
   1  -5  -9    0.75    0.28
  -1  -5   9    0.90    0.24
   1  -5  -9    0.51    0.18
  -1   5  -9    0.78    0.32
  -1  -5   9    0.21    0.18
   1   5   9    0.95    0.29
   1   5  -9    0.83    0.32
   1  -5   9    0.70    0.21
   1  -5   9    0.52    0.19
  -1  -5  -9    0.83    0.31
  -1  -5  -9    0.62    0.19
  -1   5   9    0.59    0.22
   2   5   9  216.45    5.51
   2  -5  -9  228.68    5.80
  -2  -5   9  227.60    5.36
  -2  -5   9  221.97    5.09
  -2   5  -9  223.14    5.87
   2  -5   9  224.95    5.36
   2  -5   9  220.65    5.09
  -2   5   9  227.59    5.12
   2   5  -9  227.55    5.90
  -2  -5  -9  223.72    5.84
  -2   5   9  220.80    5.28
  -2  -5  -9  221.22    5.14
   3  -5  -9   12.25    0.76
   3   5   9   12.53    0.78
  -3  -5   9   13.21    0.68
  -3   5  -9   12.77    0.82
  -3  -5  -9   13.58    0.66
  -3   5   9   13.27    0.63
   3  -5   9   13.30    0.70
   3  -5   9   12.36    0.61
  -3  -5  -9   13.53    0.83
   3   5  -9   14.64    0.87
   3   5  -9   13.38    0.62
  -3   5   9   13.46    0.61
  -4   5  -9  110.88    3.23
  -4  -5   9  109.97    2.89
   4   5   9  111.18    3.13
   4  -5  -9  106.21    3.14
  -4   5   9  110.03    2.78
   4   5  -9  109.92    3.18
   4  -5   9  109.93    2.79
   4  -5   9  108.34    2.91
  -4  -5  -9  109.35    2.86
  -4   5   9  108.43    2.73
   4   5  -9  106.65    2.76
  -4  -5  -9  105.64    3.15
  -5   5  -9    1.73    0.33
   5  -5  -9    1.14    0.34
  -5  -5   9    1.37    0.30
   5   5   9    1.09    0.36
  -5   5  -9    1.25    0.35
   5   5  -9    0.71    0.27
  -5  -5  -9    0.53    0.28
   5   5  -9    1.15    0.35
   5  -5   9    1.04    0.31
  -5   5   9    0.90    0.27
   5  -5   9    0.95    0.30
  -5   5   9    0.63    0.23
  -6   5  -9  109.89    2.91
   6  -5  -9  110.13    3.17
   6   5   9  108.03    3.16
  -6   5  -9  109.86    3.21
  -6  -5   9  109.61    2.95
   6   5  -9  107.76    2.94
  -6   5   9  108.52    2.82
   6  -5   9  107.89    2.91
  -6  -5  -9  105.69    3.00
   6   5  -9  106.08    3.11
  -7  -5   9    2.52    0.40
   7  -5  -9    2.57    0.45
   7   5   9    1.85    0.46
  -7   5  -9    3.30    0.46
   7  -5   9    2.24    0.44
  -7  -5  -9    2.44    0.47
  -7   5   9    2.58    0.40
   7   5  -9    2.50    0.48
  -8   5  -9   89.32    2.62
   8  -5  -9   93.34    2.77
   8   5   9   93.61    2.83
  -8  -5   9   90.67    2.61
   8   5  -9   82.16    2.69
  -8  -5  -9   88.59    2.72
  -8   5   9   88.69    2.55
   8  -5   9   88.04    2.61
  -9  -5   9    0.20    0.31
   9   5   9    0.54    0.44
  -9   5  -9    0.73    0.36
   9  -5   9    0.56    0.41
   9   5  -9    0.33    0.39
  -9  -5  -9    0.29    0.35
  -9   5   9    0.50    0.36
 -10  -5   9   73.86    2.42
  10   5   9   79.84    2.63
 -10   5  -9   77.81    2.51
 -10   5   9   77.55    2.46
  10  -5   9   76.42    2.46
  10   5  -9   74.42    2.65
   0  -5 -10    0.10    0.18
   0   5 -10    0.09    0.25
   0  -5 -10    0.04    0.25
   0  -5  10    0.14    0.20
   0   5  10    0.26    0.22
   0  -5  10   -0.22    0.16
   1   5  10  137.51    3.67
  -1   5 -10  139.46    4.05
   1  -5 -10  145.98    4.01
  -1  -5  10  139.18    3.32
   1  -5 -10  138.92    3.35
  -1  -5  10  143.99    3.58
   1   5 -10  136.38    4.05
   1  -5  10  139.51    3.58
  -1  -5 -10  141.51    3.40
  -1  -5 -10  144.28    4.05
   1  -5  10  136.34    3.32
  -1   5  10  138.26    3.56
  -2  -5  10    6.74    0.44
  -2   5 -10    7.02    0.72
  -2  -5  10    6.59    0.50
   2   5  10    6.91    0.65
   2  -5 -10    7.34    0.71
   2  -5  10    6.80    0.57
  -2  -5 -10    6.48    0.46
   2   5 -10    7.60    0.76
  -2   5  10    6.80    0.45
  -2  -5 -10    6.63    0.72
   2  -5  10    7.67    0.46
  -2   5  10    7.18    0.49
  -3   5 -10  116.25    3.45
   3  -5 -10  113.19    3.37
   3   5  10  117.81    3.28
  -3  -5  10  115.46    3.06
  -3   5  10  115.31    2.99
   3  -5  10  118.92    2.90
  -3  -5 -10  113.78    2.95
  -3  -5 -10  108.80    3.41
  -3   5  10  117.30    2.89
   3   5 -10  117.29    2.89
   3   5 -10  118.90    3.48
   3  -5  10  116.74    3.11
   4   5  10    1.67    0.44
   4  -5 -10    1.23    0.37
  -4   5 -10    1.37    0.39
  -4  -5  10    1.53    0.33
   4   5 -10    1.84    0.33
  -4  -5 -10    1.20    0.30
   4   5 -10    1.52    0.40
  -4   5  10    1.02    0.25
  -4   5  10    1.27    0.29
   4  -5  10    1.45    0.34
   4  -5  10    1.00    0.30
   5   5  10   66.92    2.23
   5  -5 -10   64.10    2.20
  -5   5 -10   66.54    2.27
  -5  -5  10   68.00    2.04
  -5   5  10   68.13    1.91
   5  -5  10   67.47    2.09
   5  -5  10   69.70    1.99
   5   5 -10   66.99    1.98
  -5   5  10   68.08    1.91
   5   5 -10   67.43    2.25
  -5  -5 -10   64.38    2.04
  -6   5 -10    0.07    0.31
   6  -5 -10   -0.29    0.27
  -6  -5  10    0.22    0.24
   6   5  10   -0.08    0.31
   6   5 -10   -0.10    0.25
   6   5 -10    0.06    0.29
   6  -5  10   -0.06    0.29
  -6   5  10   -0.13    0.23
  -6  -5 -10   -0.15    0.26
  -7  -5  10   65.26    2.06
   7   5  10   67.05    2.28
   7  -5 -10   65.30    2.24
   7   5 -10   66.33    2.15
  -7  -5 -10   65.29    2.17
  -7   5  10   67.26    2.01
   7  -5  10   67.34    2.09
  -8  -5  10    0.62    0.33
   8   5  10    0.47    0.39
   8  -5 -10    0.15    0.36
   8   5 -10    0.05    0.37
  -8   5  10    0.24    0.31
  -8  -5 -10   -0.07    0.31
   8  -5  10    0.23    0.35
  -9  -5  10   61.77    2.08
  -9   5 -10   65.05    2.13
   9   5  10   63.91    2.27
   9   5 -10   62.35    2.29
   9  -5  10   63.79    2.11
  -9  -5 -10   62.63    2.20
  -9   5  10   63.13    2.06
   0  -5 -11  100.28    3.13
   0  -5  11   99.11    2.72
   0   5 -11   94.26    3.13
   0  -5 -11   97.85    2.51
   0   5  11   98.76    2.76
   0  -5  11   98.30    2.46
   1  -5 -11    0.68    0.35
   1   5  11    0.30    0.26
  -1   5 -11    0.17    0.30
   1  -5 -11    0.41    0.22
  -1  -5  11    0.25    0.24
  -1  -5  11    0.38    0.21
   1  -5  11    0.07    0.22
   1  -5  11   -0.01    0.19
  -1  -5 -11    0.14    0.32
  -1   5  11    0.26    0.25
   1   5 -11    0.08    0.29
  -1  -5 -11   -0.03    0.20
  -2   5 -11   57.76    2.13
   2  -5 -11   61.15    2.13
  -2  -5  11   57.64    1.62
   2   5  11   55.71    1.92
  -2  -5  11   57.83    1.81
   2   5 -11   57.09    1.62
  -2  -5 -11   57.23    2.15
   2  -5  11   58.85    1.86
  -2   5  11   58.89    1.66
  -2  -5 -11   55.31    1.68
   2   5 -11   58.50    2.17
  -2   5  11   56.89    1.77
   2  -5  11   58.57    1.63
  -3   5 -11   13.52    0.93
   3  -5 -11   14.79    0.94
  -3  -5  11   14.29    0.76
   3   5  11   16.19    0.94
   3  -5  11   15.30    0.70
  -3  -5 -11   11.72    0.91
   3   5 -11   13.56    0.68
   3  -5  11   16.28    0.84
  -3  -5 -11   14.23    0.72
  -3   5  11   15.45    0.71
  -3   5  11   13.38    0.70
   3   5 -11   14.76    0.96
   4   5  11   75.49    2.40
  -4  -5  11   72.10    2.18
  -4   5 -11   72.44    2.47
   4  -5 -11   73.82    2.45
  -4   5  11   74.85    2.05
  -4  -5 -11   69.57    2.12
  -4   5  11   74.20    2.11
   4   5 -11   69.55    2.46
   4  -5  11   76.74    2.07
   4   5 -11   72.01    2.07
   4  -5  11   74.42    2.28
  -5   5 -11    0.26    0.33
  -5  -5  11    0.29    0.26
   5   5  11    0.04    0.34
   5  -5 -11    0.26    0.30
   5  -5  11   -0.11    0.27
  -5   5  11   -0.13    0.21
  -5   5  11    0.26    0.26
   5   5 -11   -0.21    0.29
   5  -5  11    0.06    0.28
   5   5 -11    0.09    0.26
  -5  -5 -11    0.40    0.28
   6   5  11   34.92    1.52
  -6   5 -11   35.61    1.53
  -6  -5  11   33.99    1.33
   6  -5 -11   34.13    1.48
   6  -5  11   35.31    1.33
  -6  -5 -11   34.26    1.40
   6   5 -11   33.95    1.47
   6   5 -11   37.35    1.41
  -6   5  11   33.84    1.25
  -7  -5  11    4.07    0.52
   7  -5 -11    4.53    0.61
   7   5  11    3.77    0.61
  -7   5  11    4.00    0.51
   7   5 -11    3.63    0.57
   7  -5  11    3.71    0.55
  -7  -5 -11    4.41    0.59
   8  -5 -11   57.73    2.09
  -8  -5  11   56.36    1.93
   8   5  11   54.94    2.09
  -8  -5 -11   56.10    2.01
   8   5 -11   53.33    2.03
  -8   5  11   58.69    1.88
   0  -5 -12   -0.41    0.15
   0   5  12   -0.27    0.24
   0  -5 -12   -0.21    0.29
   0  -5  12   -0.33    0.18
   0   5 -12    0.23    0.35
  -1  -5  12   47.32    1.61
   1  -5 -12   46.17    1.42
   1  -5 -12   46.88    1.91
   1   5  12   45.61    1.68
  -1   5 -12   48.10    1.95
  -1   5  12   44.81    1.57
   1   5 -12   45.13    1.93
  -1   5  12   45.39    1.42
  -1  -5 -12   45.12    1.44
   1  -5  12   48.19    1.64
  -1  -5 -12   47.78    1.97
   2  -5 -12    2.42    0.51
   2   5  12    2.00    0.44
  -2   5 -12    2.23    0.51
  -2  -5  12    2.14    0.39
  -2  -5 -12    2.86    0.37
   2  -5  12    1.88    0.39
  -2   5  12    2.29    0.37
  -2   5  12    1.88    0.33
   2   5 -12    2.89    0.56
  -2  -5 -12    1.75    0.49
  -3  -5  12   52.93    1.79
   3   5  12   51.48    1.94
   3  -5 -12   55.12    2.08
  -3   5 -12   55.44    2.11
  -3  -5 -12   53.40    1.69
   3  -5  12   56.48    1.90
  -3  -5 -12   55.98    2.17
   3   5 -12   56.51    2.16
  -3   5  12   56.14    1.76
  -3   5  12   56.47    1.66
   4  -5 -12    6.80    0.75
  -4   5 -12    7.05    0.80
   4   5  12    7.72    0.77
  -4  -5  12    7.78    0.67
  -4  -5 -12    8.10    0.67
   4  -5  12    8.56    0.77
   4   5 -12    7.16    0.81
  -4   5  12    8.96    0.62
  -4   5  12    8.03    0.56
  -5  -5  12   58.54    1.95
  -5   5 -12   61.41    2.22
   5  -5 -12   55.48    2.15
   5   5  12   63.96    2.18
   5   5 -12   59.49    2.21
  -5  -5 -12   58.69    1.94
  -5   5  12   62.12    1.87
  -5   5  12   59.94    1.81
   5  -5  12   59.65    2.06
  -6   5 -12    2.07    0.51
   6   5  12    2.83    0.59
   6  -5 -12    2.21    0.51
  -6  -5  12    1.97    0.41
   6   5 -12    1.73    0.45
  -6   5  12    2.96    0.44
  -6  -5 -12    2.09    0.45
   7  -5 -12   40.52    1.72
   7   5  12   43.04    1.75
  -7  -5  12   39.21    1.54
  -7  -5 -12   40.65    1.63
   8   5  12    4.76    0.69
  -8  -5  12    3.18    0.52
   8  -5 -12    4.00    0.65
  -8  -5 -12    4.36    0.67
   0  -5  13   15.80    0.88
   0  -5 -13   14.84    0.74
   0   5  13   13.85    0.85
   0  -5 -13   17.77    1.17
   0   5 -13   15.11    1.09
  -1   5 -13    1.03    0.46
   1   5  13    1.03    0.37
  -1  -5  13    1.83    0.39
   1  -5 -13    1.48    0.49
  -1  -5 -13    1.05    0.46
   1  -5  13    1.89    0.40
  -1   5  13    0.68    0.27
   1   5 -13    0.92    0.43
  -1  -5 -13    1.28    0.32
  -1   5  13    1.72    0.39
  -2  -5  13   26.54    1.15
  -2   5 -13   26.69    1.43
   2   5  13   23.45    1.22
   2  -5 -13   24.81    1.36
  -2   5  13   25.29    1.00
  -2  -5 -13   23.87    1.40
   2  -5  13   25.55    1.20
  -2   5  13   24.45    1.10
  -2  -5 -13   26.20    1.03
   2   5 -13   26.38    1.44
  -3   5 -13    3.27    0.60
  -3  -5  13    4.11    0.52
   3  -5 -13    3.74    0.65
   3   5  13    3.98    0.60
  -3  -5 -13    3.63    0.47
   3  -5  13    3.13    0.52
  -3   5  13    3.79    0.45
  -3   5  13    2.84    0.44
   3   5 -13    4.43    0.72
  -3  -5 -13    2.97    0.62
   4  -5 -13   42.54    1.79
  -4  -5  13   38.51    1.51
  -4   5 -13   41.11    1.79
   4   5  13   40.38    1.70
  -4   5  13   41.11    1.40
  -4  -5 -13   40.93    1.49
   4  -5  13   42.11    1.66
   4   5 -13   41.44    1.84
  -4   5  13   42.76    1.48
   5  -5 -13    0.41    0.42
   5   5  13    0.07    0.37
  -5   5 -13    0.54    0.42
  -5  -5  13    0.59    0.34
  -5  -5 -13    0.46    0.34
  -5   5  13    0.30    0.30
   5  -5  13   -0.12    0.36
   5   5 -13    0.60    0.42
  -6  -5  13   36.49    1.44
  -6   5 -13   35.42    1.63
   6   5  13   35.48    1.61
   6  -5 -13   31.70    1.56
  -6  -5 -13   34.87    1.44
   6   5 -13   36.01    1.64
   7  -5 -13   -0.30    0.35
  -7  -5  13   -0.25    0.30
   7   5  13   -0.43    0.36
  -7  -5 -13    0.04    0.38
   0  -5 -14   -0.33    0.34
   0   5 -14    0.07    0.41
   0  -5  14    0.17    0.32
   0  -5 -14   -0.29    0.22
   0   5  14    0.16    0.33
   1  -5 -14    9.54    1.00
  -1  -5  14   11.29    0.78
   1   5  14   11.84    0.87
  -1   5 -14   11.28    1.09
   1  -5  14   11.21    0.80
  -1   5  14   10.93    0.66
  -1  -5 -14   10.66    1.06
  -1   5  14   10.53    0.77
  -1  -5 -14   10.54    0.64
   1   5 -14   10.76    1.08
   2   5  14    4.35    0.65
  -2   5 -14    5.98    0.82
   2  -5 -14    5.58    0.81
  -2  -5  14    5.41    0.63
  -2   5  14    5.82    0.62
   2  -5  14    5.41    0.66
  -2  -5 -14    5.14    0.81
   2   5 -14    6.60    0.88
  -2   5  14    4.89    0.51
  -2  -5 -14    6.07    0.57
   3  -5 -14   12.23    1.11
  -3  -5  14   10.97    0.78
   3   5  14   11.99    1.01
  -3   5 -14   11.73    1.07
   3  -5  14   12.88    0.89
  -3   5  14   12.41    0.78
   3   5 -14   11.99    1.13
  -3  -5 -14   10.52    0.72
  -3  -5 -14   13.50    1.19
  -4   5 -14    1.85    0.55
  -4  -5  14    2.28    0.47
   4  -5 -14    2.45    0.55
   4   5  14    2.56    0.56
   4  -5  14    2.34    0.54
   4   5 -14    2.21    0.60
  -4   5  14    2.67    0.45
  -4  -5 -14    1.92    0.43
   5   5  14    8.81    0.90
  -5   5 -14    8.94    0.94
   5  -5 -14    9.26    0.95
  -5  -5  14    8.45    0.78
   5   5 -14   11.61    1.07
  -5  -5 -14    8.82    0.77
  -6  -5  14    0.11    0.33
   6  -5 -14    0.32    0.43
   6   5  14    0.46    0.44
  -6  -5 -14   -0.14    0.36
   6   5 -14    0.12    0.44
   0  -5  15   12.03    0.88
   0   5 -15   10.95    1.13
   0  -5 -15    9.45    1.08
   0   5  15   11.95    0.89
  -1  -5  15    0.03    0.32
  -1   5 -15    0.18    0.43
   1   5  15   -0.05    0.32
   1  -5 -15    0.11    0.43
   1   5 -15    0.22    0.44
  -1   5  15    0.29    0.32
  -1  -5 -15   -0.09    0.44
   1  -5  15    0.38    0.35
   2  -5 -15    9.36    1.04
  -2  -5  15    8.87    0.81
   2   5  15    8.90    0.87
  -2   5 -15    8.39    0.99
  -2   5  15    9.88    0.82
   2  -5  15    9.97    0.90
  -2  -5 -15    8.80    0.71
   2   5 -15    9.81    1.08
  -2  -5 -15    9.26    1.05
   3  -5 -15    0.31    0.42
  -3  -5  15   -0.02    0.33
  -3   5 -15   -0.18    0.40
   3   5  15   -0.31    0.40
  -3  -5 -15    0.01    0.28
   3  -5  15    0.18    0.40
   3   5 -15    0.02    0.44
  -3  -5 -15    0.51    0.47
  -3   5  15   -0.16    0.30
   4  -5 -15    0.05    0.42
  -4   5 -15    0.08    0.40
   4   5  15    0.12    0.40
  -4  -5  15    0.40    0.37
  -4  -5 -15    0.70    0.36
  -4   5  15    0.43    0.36
   4   5 -15    0.15    0.48
   4  -5  15   -0.06    0.41
   0   5 -16   -0.18    0.43
   0  -5  16    0.28    0.38
   0   5  16    0.12    0.35
   0  -5 -16   -0.06    0.43
  -1   5 -16    2.20    0.65
  -1  -5  16    0.94    0.46
   1   5  16    1.35    0.51
   1  -5 -16    1.53    0.63
   1  -5  16    1.35    0.49
  -1   5  16    1.48    0.47
   1   5 -16    1.49    0.58
  -1  -5 -16    1.09    0.57
  -2   5 -16    0.01    0.41
  -2   5  16    0.16    0.38
  -2  -5 -16   -0.08    0.43
   2  -5  16    0.04    0.41
   0  -6   0  266.44    6.49
   0  -6   0  275.80    6.13
   0  -6   0  275.89    5.91
   0  -6   0  276.86    5.96
   1  -6   0   -0.24    0.09
  -1  -6   0   -0.07    0.10
   1  -6   0   -0.18    0.07
   1  -6   0   -0.02    0.08
  -1  -6   0   -0.30    0.09
  -1  -6   0   -0.09    0.08
  -1   6   0   -0.28    0.06
  -1  -6   0   -0.08    0.07
  -2  -6   0  152.74    3.60
  -2  -6   0  156.62    3.40
   2  -6   0  151.60    3.46
  -2  -6   0  154.62    3.44
   2  -6   0  145.66    3.41
  -2  -6   0  153.76    3.72
   2  -6   0  152.38    3.80
  -2   6   0  155.33    3.43
  -3   6   0   -0.08    0.10
  -3  -6   0   -0.02    0.12
   3   6   0    0.08    0.12
   3   6   0   -0.05    0.11
   3  -6   0   -0.08    0.13
   3  -6   0   -0.17    0.10
  -3  -6   0   -0.10    0.09
   4  -6   0  756.98   17.64
   4   6   0  788.88   17.46
  -4   6   0  751.71   16.35
   4   6   0  741.71   16.40
   4  -6   0  759.09   16.51
  -4  -6   0  784.10   16.39
  -4  -6   0  748.11   16.88
  -5  -6   0    0.01    0.15
   5   6   0   -0.08    0.17
   5  -6   0    0.62    0.23
   5  -6   0   -0.08    0.16
  -5  -6   0    0.06    0.14
  -5   6   0   -0.04    0.15
  -6  -6   0  237.12    5.81
   6  -6   0  237.11    5.93
  -6  -6   0  252.54    5.93
   6  -6   0  258.20    6.11
  -6   6   0  257.11    5.75
   6   6   0  249.47    5.80
  -7  -6   0    0.10    0.21
  -7  -6   0   -0.10    0.20
  -7   6   0   -0.28    0.19
   7  -6   0   -0.24    0.20
   7  -6   0    0.27    0.30
   7   6   0    0.05    0.23
   8   6   0  108.12    3.04
  -8  -6   0  105.30    2.99
  -8   6   0  107.64    2.96
  -8  -6   0  108.59    3.05
   8  -6   0  110.97    3.00
   8  -6   0  112.56    3.19
  -9  -6   0   -0.07    0.23
   9   6   0   -0.44    0.32
   9  -6   0   -0.17    0.32
  -9   6   0   -0.10    0.25
  -9  -6   0    0.11    0.29
 -10  -6   0   35.51    1.45
 -10  -6   0   37.15    1.55
 -10   6   0   34.93    1.48
  10   6   0   34.82    1.58
  10  -6   0   33.26    1.57
 -11  -6   0   -0.03    0.39
 -11  -6   0    0.19    0.32
 -11   6   0    0.23    0.38
  11   6   0    0.12    0.42
  11  -6   0   -0.66    0.40
   0  -6   1    0.05    0.12
   0  -6  -1   -0.05    0.10
   0  -6   1    0.03    0.08
   0  -6  -1   -0.15    0.09
   0   6  -1   -0.09    0.06
   0  -6   1    0.04    0.09
   0  -6  -1   -0.10    0.07
   0  -6  -1   -0.03    0.07
  -1  -6   1  148.11    3.32
  -1   6  -1  152.67    3.27
   1  -6  -1  141.71    3.64
   1  -6  -1  147.23    3.30
  -1  -6   1  148.16    3.43
   1  -6  -1  137.88    3.40
  -1  -6   1  150.16    3.23
   1  -6   1  146.68    3.33
  -1  -6  -1  151.46    3.29
  -1  -6  -1  147.51    3.50
  -1  -6  -1  150.11    3.29
  -1  -6  -1  147.31    3.61
   1  -6   1  147.91    3.33
   1  -6   1  144.33    3.67
   1   6  -1  151.64    3.68
  -1   6   1  150.62    3.30
  -2  -6   1    2.96    0.27
  -2   6  -1    2.78    0.21
   2  -6  -1    3.42    0.23
   2  -6  -1    3.22    0.31
   2   6   1    3.86    0.22
  -2  -6   1    3.03    0.19
  -2  -6   1    3.20    0.23
  -2  -6  -1    2.99    0.29
   2  -6   1    2.86    0.25
  -2   6   1    3.11    0.17
   2  -6   1    2.81    0.30
  -2   6   1    3.26    0.23
  -2  -6  -1    3.26    0.25
  -2  -6  -1    2.89    0.21
   2  -6   1    3.27    0.15
   2   6  -1    2.74    0.29
  -3  -6   1  220.53    4.79
  -3  -6   1  210.63    5.03
   3   6   1  215.91    4.84
  -3   6  -1  217.39    4.84
   3  -6  -1  215.24    4.89
   3   6  -1  218.72    5.22
  -3  -6  -1  221.81    5.10
  -3  -6  -1  215.19    4.84
   3  -6   1  215.70    4.92
  -3   6   1  218.42    4.85
   3  -6   1  218.31    5.30
  -3  -6  -1  215.34    5.13
   3   6  -1  220.41    4.86
   4   6   1    4.22    0.25
   4  -6  -1    3.28    0.35
   4  -6  -1    4.53    0.40
  -4  -6   1    3.41    0.33
  -4   6  -1    3.80    0.33
   4   6   1    3.90    0.34
  -4  -6   1    4.46    0.31
  -4  -6  -1    4.57    0.33
   4  -6   1    3.52    0.36
   4  -6   1    3.89    0.38
  -4   6   1    3.63    0.31
  -4  -6  -1    3.74    0.38
   4   6  -1    3.49    0.32
   4   6  -1    3.93    0.28
   5  -6  -1  254.12    6.19
  -5  -6   1  254.74    5.96
   5  -6  -1  251.25    5.94
   5   6   1  251.20    5.82
  -5  -6   1  254.69    5.82
  -5   6  -1  250.56    5.78
  -5  -6  -1  260.27    5.87
   5  -6   1  256.43    6.20
  -5   6   1  260.64    5.77
   5  -6   1  250.34    5.93
  -5  -6  -1  258.11    6.02
   5   6  -1  251.74    5.81
   6   6   1    0.94    0.28
   6  -6  -1    0.82    0.23
  -6  -6   1    0.57    0.22
  -6   6  -1    0.89    0.25
  -6  -6   1    0.57    0.21
   6  -6  -1    0.62    0.27
   6  -6   1    0.95    0.27
  -6   6   1    0.35    0.19
   6  -6   1    0.29    0.25
   6   6  -1    0.36    0.22
  -6  -6  -1    0.82    0.26
  -6  -6  -1    0.13    0.21
   7  -6  -1  122.68    3.38
  -7  -6   1  120.07    3.19
  -7   6  -1  122.62    3.16
   7  -6  -1  123.13    3.25
   7   6   1  119.73    3.21
  -7  -6   1  118.74    3.22
   7  -6   1  123.69    3.26
  -7  -6  -1  123.07    3.25
  -7  -6  -1  121.07    3.25
   7  -6   1  120.91    3.33
   7   6  -1  120.24    3.20
  -7   6   1  124.25    3.14
  -8  -6   1    3.69    0.48
   8  -6  -1    4.42    0.61
  -8  -6   1    4.38    0.56
  -8   6  -1    4.21    0.50
   8   6   1    3.55    0.50
   8  -6  -1    3.75    0.44
  -8  -6  -1    3.33    0.47
  -8  -6  -1    3.82    0.53
   8   6  -1    3.01    0.49
   8  -6   1    3.89    0.46
   8  -6   1    4.13    0.58
  -8   6   1    4.84    0.53
   9  -6  -1   85.95    2.73
  -9  -6   1   84.85    2.57
  -9  -6   1   81.56    2.46
  -9   6  -1   82.25    2.51
   9   6   1   81.75    2.58
   9   6  -1   84.35    2.60
   9  -6   1   85.25    2.67
  -9  -6  -1   79.93    2.49
  -9   6   1   75.53    2.42
  -9  -6  -1   84.23    2.57
  10  -6  -1   -0.21    0.37
 -10   6  -1   -0.12    0.32
 -10  -6   1    0.02    0.27
 -10  -6   1    0.20    0.34
  10   6   1    0.28    0.38
  10  -6   1   -0.50    0.37
 -10   6   1   -0.30    0.30
 -10  -6  -1   -0.01    0.35
 -10  -6  -1   -0.19    0.25
  10   6  -1    0.02    0.35
 -11  -6   1   60.77    2.15
  11  -6  -1   61.13    2.30
 -11   6  -1   54.04    2.09
  11   6   1   57.04    2.22
 -11  -6   1   53.20    1.99
 -11  -6  -1   58.39    2.12
 -11   6   1   54.45    2.06
  11  -6   1   56.04    2.20
  11   6  -1   59.42    2.25
 -11  -6  -1   53.20    2.01
   0   6  -2  334.66    6.98
   0  -6  -2  317.15    7.68
   0   6   2  318.40    7.39
   0  -6  -2  327.40    7.07
   0   6  -2  334.90    7.80
   0  -6  -2  333.94    7.03
   0  -6   2  320.77    7.25
  -1   6  -2    0.88    0.12
   1  -6  -2    0.85    0.12
  -1  -6   2    1.07    0.10
  -1  -6   2    0.84    0.15
  -1  -6   2    0.96    0.15
   1  -6  -2    0.97    0.19
  -1   6  -2    0.73    0.19
  -1  -6  -2    0.77    0.13
  -1  -6  -2    1.17    0.18
  -1  -6  -2    0.87    0.12
  -1  -6  -2    0.74    0.18
  -1   6   2    1.04    0.15
  -1   6   2    0.94    0.15
   1  -6   2    0.89    0.12
   1  -6   2    0.67    0.14
   1   6  -2    1.24    0.23
  -2   6  -2  300.15    7.23
  -2   6  -2  304.18    6.55
  -2  -6   2  294.30    6.80
   2  -6  -2  292.13    7.16
  -2  -6   2  312.27    6.46
  -2  -6   2  301.48    6.61
   2   6   2  304.44    6.55
   2  -6  -2  300.57    6.57
   2  -6   2  305.27    6.64
  -2  -6  -2  302.14    6.59
   2  -6   2  300.63    6.63
  -2   6   2  304.34    6.59
  -2  -6  -2  304.62    7.07
   2   6  -2  292.52    7.21
  -2   6   2  309.54    6.66
  -2  -6  -2  296.60    6.92
  -3  -6   2    2.65    0.27
  -3   6  -2    2.34    0.29
   3  -6  -2    2.31    0.28
  -3  -6   2    2.23    0.19
   3   6   2    2.70    0.25
  -3   6  -2    2.90    0.26
   3  -6  -2    2.36    0.25
  -3  -6  -2    2.60    0.32
   3  -6   2    2.22    0.29
  -3  -6  -2    2.85    0.23
  -3   6   2    2.52    0.24
   3  -6   2    1.87    0.24
  -3   6   2    2.52    0.13
   3  -6   2    2.45    0.13
   3   6  -2    2.21    0.27
   3   6  -2    2.42    0.24
  -3  -6  -2    1.89    0.23
  -4  -6   2   72.31    1.91
   4  -6  -2   72.45    1.90
   4   6   2   68.17    1.82
  -4   6  -2   69.73    1.83
  -4   6  -2   68.09    2.00
   4  -6  -2   68.90    1.97
  -4  -6   2   71.99    1.79
  -4  -6  -2   70.17    1.99
   4   6  -2   71.79    1.89
  -4  -6  -2   69.56    1.77
  -4  -6  -2   73.09    1.88
   4   6  -2   71.78    1.84
   4  -6   2   71.64    1.92
   4  -6   2   72.22    2.02
  -4   6   2   69.37    1.81
  -5   6  -2    0.04    0.14
   5  -6  -2    0.12    0.17
  -5   6  -2   -0.06    0.16
  -5  -6   2    0.10    0.15
  -5  -6   2   -0.05    0.15
   5  -6  -2    0.21    0.20
   5   6   2    0.14    0.18
  -5  -6  -2    0.05    0.16
   5  -6   2    0.00    0.18
   5  -6   2    0.14    0.19
   5   6  -2    0.22    0.16
  -5   6   2    0.19    0.15
  -5  -6  -2   -0.14    0.17
  -6  -6   2  106.33    2.86
   6  -6  -2  101.86    2.97
   6  -6  -2  110.45    2.95
  -6  -6   2  110.99    2.88
  -6   6  -2  111.53    2.97
   6   6   2  114.73    2.88
  -6   6  -2  113.33    2.85
  -6   6   2  113.54    2.80
  -6  -6  -2  108.53    2.92
   6   6  -2  113.15    2.87
   6  -6   2  105.12    2.95
  -6  -6  -2  110.28    2.96
  -7  -6   2    0.18    0.21
   7  -6  -2   -0.22    0.25
  -7  -6   2   -0.31    0.20
   7  -6  -2   -0.03    0.20
  -7   6  -2   -0.08    0.21
  -7   6  -2    0.11    0.21
   7   6   2    0.37    0.28
   7  -6   2   -0.09    0.24
  -7  -6  -2    0.04    0.21
  -7  -6  -2    0.20    0.25
  -7   6   2    0.02    0.20
   7   6  -2    0.18    0.24
  -8   6  -2  107.64    2.94
   8  -6  -2  110.78    3.18
  -8  -6   2  104.85    2.90
  -8   6  -2  106.99    2.95
   8  -6  -2  108.37    2.92
   8   6   2  103.08    2.97
  -8  -6   2  107.47    2.99
  -8  -6  -2  106.78    2.99
   8   6  -2  101.85    2.96
  -8  -6  -2  101.23    2.96
   8  -6   2  104.02    3.04
  -8   6   2  102.57    2.85
  -9  -6   2   -0.17    0.31
   9   6   2   -0.12    0.31
   9  -6  -2   -0.23    0.34
  -9   6  -2   -0.01    0.26
  -9  -6   2    0.07    0.27
   9   6  -2   -0.21    0.29
  -9  -6  -2   -0.12    0.30
  -9  -6  -2   -0.27    0.23
   9  -6   2    0.35    0.37
  -9   6   2    0.23    0.29
 -10  -6   2   87.52    2.70
 -10  -6   2   83.23    2.57
  10   6   2   77.26    2.67
  10  -6  -2   87.61    2.88
 -10   6  -2   82.26    2.66
 -10   6   2   80.39    2.58
 -10  -6  -2   82.61    2.64
  10  -6   2   85.67    2.75
 -10  -6  -2   89.28    2.70
  10   6  -2   85.83    2.76
  11   6   2   -0.22    0.40
  11  -6  -2    0.20    0.46
 -11   6  -2    0.79    0.45
 -11  -6   2    0.34    0.36
  11  -6   2    0.22    0.43
 -11   6   2    0.19    0.39
 -11  -6  -2   -0.11    0.32
 -11  -6  -2    0.24    0.37
  11   6  -2    0.63    0.49
   0   6  -3   -0.05    0.14
   0  -6   3   -0.10    0.08
   0  -6   3    0.08    0.11
   0  -6  -3    0.09    0.12
   0   6  -3   -0.02    0.06
   0   6   3   -0.12    0.11
   0  -6  -3    0.04    0.09
   0  -6  -3   -0.03    0.06
  -1  -6   3  319.33    6.99
  -1  -6   3  313.29    7.17
   1  -6  -3  321.26    6.88
  -1   6  -3  327.11    7.71
   1  -6  -3  307.71    7.57
   1   6   3  310.87    7.36
  -1   6  -3  329.00    6.88
   1  -6   3  318.63    7.00
  -1   6   3  320.81    7.18
   1  -6   3  316.85    7.10
   1   6  -3  317.50    7.70
  -1  -6  -3  324.77    6.88
  -1   6   3  323.44    6.97
  -1  -6  -3  323.80    6.97
   1   6  -3  327.26    6.79
  -1  -6  -3  316.54    7.52
   2   6   3    0.63    0.12
   2  -6  -3    0.71    0.12
  -2   6  -3    0.69    0.13
  -2  -6   3    0.59    0.15
  -2  -6   3    0.95    0.17
   2  -6  -3    1.02    0.20
   2   6   3    0.77    0.20
  -2  -6   3    0.87    0.09
  -2   6  -3    0.71    0.20
  -2   6   3    0.72    0.12
   2  -6   3    0.78    0.11
   2  -6   3    0.77    0.16
  -2  -6  -3    1.09    0.23
  -2  -6  -3    0.61    0.14
  -2   6   3    0.61    0.14
  -2  -6  -3    0.90    0.16
   2   6  -3    0.75    0.21
  -3  -6   3  136.59    2.99
   3   6   3  134.48    3.10
  -3   6  -3  130.30    3.49
   3  -6  -3  134.09    3.43
  -3   6  -3  135.08    3.12
   3  -6  -3  137.05    3.13
  -3  -6   3  131.82    3.25
  -3   6   3  138.75    3.04
   3   6  -3  137.00    3.46
  -3  -6  -3  140.20    3.28
  -3  -6  -3  132.08    3.16
  -3  -6  -3  132.43    3.41
   3  -6   3  133.86    3.19
   3   6  -3  136.53    3.15
   3  -6   3  128.24    3.05
  -3   6   3  135.62    3.13
  -4   6  -3    0.41    0.16
   4  -6  -3    0.76    0.20
  -4  -6   3    0.56    0.15
   4   6   3    0.76    0.19
  -4  -6   3    0.49    0.17
   4  -6  -3    0.59    0.20
  -4   6  -3    0.60    0.21
   4   6  -3    0.54    0.19
  -4  -6  -3    0.71    0.20
  -4   6   3    0.83    0.19
  -4  -6  -3    0.63    0.14
  -4   6   3    0.62    0.10
   4   6  -3    0.69    0.19
  -4  -6  -3    0.37    0.18
   4  -6   3    0.84    0.22
   4  -6   3    0.59    0.10
   5  -6  -3   66.35    1.93
  -5  -6   3   68.83    1.82
  -5   6  -3   66.73    1.84
  -5  -6   3   65.92    1.86
   5  -6  -3   68.78    1.95
  -5   6  -3   69.44    1.99
   5   6   3   62.84    1.82
  -5  -6  -3   65.69    1.89
   5   6  -3   65.20    1.79
   5  -6   3   67.93    1.94
  -5  -6  -3   66.12    1.99
   6  -6  -3    0.47    0.25
   6  -6  -3    0.43    0.21
  -6  -6   3    0.36    0.21
   6   6   3    0.02    0.21
  -6   6  -3    0.56    0.23
  -6   6  -3    0.24    0.21
  -6  -6   3    0.47    0.21
  -6   6   3   -0.01    0.17
   6  -6   3   -0.03    0.21
  -6  -6  -3    0.11    0.20
  -6  -6  -3    0.27    0.24
   6   6  -3    0.17    0.21
  -7   6  -3  114.10    3.05
  -7  -6   3  110.24    2.95
   7  -6  -3  111.48    3.01
   7   6   3  107.91    2.98
   7  -6  -3  110.27    3.17
  -7   6  -3  113.22    2.97
  -7  -6   3  114.36    3.01
   7   6  -3  108.75    2.96
  -7  -6  -3  106.03    3.01
  -7   6   3  107.55    2.86
  -7  -6  -3  106.28    3.05
   7  -6   3  113.38    3.08
   8   6   3    0.23    0.31
  -8   6  -3   -0.13    0.26
   8  -6  -3   -0.14    0.33
  -8  -6   3    0.44    0.26
   8  -6  -3   -0.04    0.23
  -8  -6   3   -0.20    0.26
  -8  -6  -3    0.31    0.30
   8   6  -3    0.72    0.31
   8  -6   3    0.31    0.31
  -8  -6  -3    0.14    0.26
  -8   6   3    0.13    0.24
   9   6   3   98.89    2.94
   9  -6  -3  102.61    3.15
  -9  -6   3   95.57    2.79
  -9   6  -3   96.28    2.89
   9   6  -3   96.13    2.91
  -9   6   3   95.65    2.78
  -9  -6  -3   98.24    2.94
   9  -6   3   98.40    2.95
  -9  -6  -3   99.85    2.91
  10  -6  -3   -0.17    0.46
 -10   6  -3    0.42    0.37
  10   6   3    0.21    0.42
 -10  -6   3   -0.57    0.26
  10   6  -3    0.43    0.41
 -10   6   3    0.34    0.33
 -10  -6  -3   -0.19    0.30
 -10  -6  -3    0.21    0.37
  10  -6   3    0.02    0.37
 -11   6  -3   74.40    2.59
  11  -6  -3   74.79    2.71
 -11  -6   3   72.77    2.40
  11   6   3   72.79    2.60
  11   6   3   76.18    2.57
  11   6  -3   70.19    2.56
 -11  -6  -3   72.94    2.46
  11  -6   3   73.45    2.54
 -11   6   3   70.29    2.43
   0  -6  -4  150.60    3.86
   0   6   4  151.44    3.74
   0  -6   4  155.56    3.62
   0   6  -4  153.90    4.05
   0  -6   4  161.15    3.55
   0  -6  -4  160.18    3.38
   0   6  -4  153.58    3.35
   0  -6  -4  158.19    3.53
   1  -6  -4    0.24    0.11
   1  -6  -4    0.24    0.15
   1  -6  -4    0.30    0.08
   1   6   4    0.19    0.07
  -1  -6   4    0.23    0.11
   1   6   4    0.08    0.15
  -1  -6   4    0.14    0.12
  -1   6  -4    0.25    0.09
  -1   6  -4    0.29    0.18
  -1  -6  -4    0.26    0.13
  -1  -6  -4    0.21    0.11
   1  -6   4    0.16    0.10
  -1   6   4    0.01    0.10
   1  -6   4    0.03    0.11
   1   6  -4    0.13    0.17
   2  -6  -4  159.96    3.52
  -2  -6   4  159.23    3.76
   2  -6  -4  155.26    3.99
  -2   6  -4  158.75    4.11
  -2  -6   4  163.54    3.39
  -2   6  -4  161.35    3.58
  -2  -6   4  160.22    3.64
   2   6   4  163.66    4.00
   2   6   4  161.82    3.54
   2  -6   4  155.01    3.64
   2   6  -4  153.51    4.09
  -2   6   4  161.33    3.65
  -2  -6  -4  155.89    3.64
  -2  -6  -4  156.64    3.89
  -2   6   4  158.39    3.62
   2  -6   4  158.93    3.66
   3   6   4    6.56    0.49
   3  -6  -4    6.27    0.33
   3  -6  -4    6.39    0.43
  -3   6  -4    6.45    0.36
  -3  -6   4    6.46    0.25
  -3   6  -4    6.55    0.49
   3   6   4    6.55    0.35
  -3  -6   4    6.17    0.38
  -3   6   4    6.48    0.37
  -3  -6  -4    6.84    0.36
   3  -6   4    6.48    0.41
  -3  -6  -4    6.40    0.38
   3   6  -4    6.54    0.46
  -3   6   4    6.60    0.29
   3   6  -4    6.37    0.37
   3  -6   4    5.92    0.29
  -4   6  -4   48.89    1.58
   4  -6  -4   51.58    1.43
  -4   6  -4   47.39    1.39
   4  -6  -4   47.81    1.53
   4   6   4   49.65    1.62
  -4  -6   4   48.65    1.43
  -4  -6   4   50.65    1.28
   4   6   4   49.10    1.38
   4   6  -4   49.59    1.49
  -4  -6  -4   48.73    1.34
   4   6  -4   48.28    1.40
   4  -6   4   47.92    1.26
  -4  -6  -4   49.18    1.45
  -4   6   4   50.53    1.23
   4  -6   4   51.62    1.48
  -4   6   4   49.08    1.37
   5   6   4    0.39    0.25
  -5   6  -4    0.93    0.26
   5  -6  -4    0.56    0.22
  -5  -6   4    0.65    0.19
  -5   6  -4    0.61    0.22
  -5  -6   4    0.73    0.21
   5  -6  -4    1.08    0.27
   5   6   4    0.87    0.24
   5   6  -4    1.24    0.23
   5  -6   4    0.67    0.24
   5   6  -4    0.88    0.23
  -5  -6  -4    1.08    0.27
  -5   6   4    1.11    0.22
   6   6   4   91.55    2.59
  -6   6  -4   88.84    2.41
  -6  -6   4   85.92    2.37
   6   6   4   91.62    2.42
  -6  -6   4   87.28    2.38
   6  -6  -4   82.04    2.50
   6  -6  -4   89.00    2.48
  -6   6  -4   84.20    2.50
  -6   6   4   87.60    2.31
  -6  -6  -4   88.14    2.47
   6   6  -4   85.54    2.38
   6  -6   4   85.24    2.46
  -7  -6   4   19.65    0.87
  -7   6  -4   18.27    0.90
   7  -6  -4   18.63    0.87
  -7   6  -4   18.81    0.90
   7   6   4   17.83    0.92
   7   6   4   17.88    0.97
   7  -6  -4   17.59    1.00
  -7   6   4   18.59    0.83
   7  -6   4   18.95    0.97
  -7  -6  -4   19.53    0.96
   7   6  -4   18.48    0.90
   8   6   4   42.71    1.62
   8  -6  -4   41.18    1.72
  -8  -6   4   40.90    1.45
  -8   6  -4   42.74    1.57
   8   6   4   39.01    1.52
   8  -6  -4   41.26    1.44
   8  -6   4   40.71    1.56
   8   6  -4   40.74    1.55
  -8   6   4   40.81    1.43
  -8  -6  -4   40.80    1.57
   9  -6  -4    1.22    0.51
  -9  -6   4    0.99    0.34
   9   6   4    1.11    0.45
  -9   6  -4    0.35    0.33
   9   6   4    0.54    0.41
   9   6  -4    0.67    0.40
  -9   6   4    0.92    0.34
  -9  -6  -4    0.61    0.37
   9  -6   4    1.26    0.44
  10   6   4   58.22    2.12
  10  -6  -4   54.84    2.22
 -10   6  -4   56.52    2.09
 -10  -6   4   55.30    1.92
  10   6   4   55.69    2.12
 -10  -6  -4   53.46    1.99
 -10   6   4   56.26    1.95
  10   6  -4   56.30    2.10
  10  -6   4   58.69    2.09
  11   6   4    1.48    0.58
 -11   6  -4    0.25    0.46
  11  -6  -4    0.94    0.59
  11   6   4    0.96    0.54
 -11  -6   4    0.44    0.37
 -11  -6  -4    0.54    0.42
  11  -6   4    0.92    0.50
 -11   6   4    0.67    0.44
  11   6  -4    0.75    0.51
   0  -6   5    0.13    0.12
   0  -6  -5   -0.06    0.05
   0   6  -5    0.34    0.21
   0  -6  -5   -0.04    0.14
   0  -6  -5    0.04    0.11
   0   6   5    0.02    0.13
   0  -6   5    0.02    0.12
   1  -6  -5   50.73    1.12
  -1  -6   5   49.73    1.31
  -1   6  -5   50.27    1.22
  -1  -6   5   47.58    1.35
   1  -6  -5   48.69    1.29
   1   6   5   48.14    1.14
  -1   6  -5   50.18    1.65
   1   6   5   46.59    1.49
   1  -6  -5   49.07    1.50
   1  -6   5   49.10    1.31
  -1  -6  -5   48.23    1.45
   1  -6   5   48.44    1.32
   1   6  -5   47.29    1.62
  -1  -6  -5   49.16    1.31
  -1   6   5   47.61    1.35
  -2   6  -5    0.08    0.11
  -2  -6   5    0.17    0.14
   2   6   5    0.24    0.20
  -2  -6   5    0.27    0.14
   2  -6  -5    0.18    0.16
  -2   6  -5    0.21    0.20
   2  -6  -5    0.32    0.09
   2   6   5    0.11    0.10
   2  -6   5    0.14    0.13
  -2  -6  -5    0.25    0.15
  -2   6   5   -0.03    0.12
   2  -6   5    0.44    0.13
  -2   6   5    0.14    0.11
  -2  -6  -5    0.24    0.13
   2   6  -5    0.11    0.17
   3  -6  -5   94.82    2.60
  -3  -6   5   90.56    2.40
   3   6   5   94.86    2.65
   3  -6  -5   95.12    2.23
   3   6   5   94.62    2.26
  -3   6  -5   97.77    2.33
  -3   6  -5   89.91    2.67
   3  -6   5   90.49    2.28
  -3   6   5   95.88    2.31
  -3  -6  -5   92.03    2.36
   3   6  -5   93.43    2.32
  -3   6   5   96.05    2.26
  -3  -6  -5   95.72    2.46
   3   6  -5   94.49    2.63
   3  -6   5   96.07    2.37
   4   6   5    4.13    0.36
  -4   6  -5    3.29    0.41
   4   6   5    3.00    0.42
  -4   6  -5    3.32    0.35
   4  -6  -5    3.66    0.40
  -4  -6   5    4.15    0.39
   4  -6  -5    3.77    0.35
   4  -6   5    3.57    0.38
   4   6  -5    3.99    0.41
  -4   6   5    3.02    0.31
   4  -6   5    3.09    0.27
   4   6  -5    3.12    0.33
  -4   6   5    3.48    0.24
  -4  -6  -5    3.57    0.31
  -4  -6  -5    3.40    0.36
  -5  -6   5   80.66    2.16
   5  -6  -5   75.23    2.17
  -5   6  -5   77.51    2.34
  -5   6  -5   76.45    2.14
   5   6   5   77.67    2.11
   5  -6  -5   80.91    2.29
   5   6   5   79.92    2.39
   5  -6   5   77.68    2.19
  -5  -6  -5   81.06    2.22
  -5   6   5   74.38    2.05
   5   6  -5   80.35    2.13
   5   6  -5   80.38    2.20
   6   6   5    2.31    0.44
   6  -6  -5    2.09    0.40
  -6  -6   5    1.65    0.31
  -6   6  -5    2.26    0.39
   6  -6  -5    1.84    0.35
  -6   6  -5    2.77    0.40
   6   6   5    1.89    0.35
  -6  -6  -5    1.51    0.34
  -6   6   5    1.96    0.32
   6  -6   5    2.10    0.38
   6   6  -5    2.49    0.37
   7   6   5   39.79    1.57
   7  -6  -5   41.10    1.43
   7  -6  -5   35.74    1.54
  -7   6  -5   43.34    1.52
   7   6   5   44.75    1.50
  -7  -6   5   41.12    1.40
  -7   6  -5   41.25    1.48
   7  -6   5   38.84    1.47
   7   6  -5   39.62    1.44
  -7   6   5   36.91    1.32
  -7  -6  -5   39.89    1.49
   8  -6  -5    0.06    0.27
   8  -6  -5    0.11    0.37
  -8  -6   5    0.01    0.24
   8   6   5   -0.13    0.32
  -8   6  -5    0.10    0.28
   8   6   5   -0.12    0.34
   8   6  -5    0.01    0.29
  -8   6   5    0.01    0.24
  -8  -6  -5   -0.07    0.31
   8  -6   5    0.30    0.34
  -9   6  -5   14.25    0.94
   9   6   5   15.77    1.00
   9   6   5   14.45    1.01
  -9  -6   5   15.33    0.87
   9  -6  -5   14.78    1.09
  -9   6   5   13.62    0.83
   9  -6   5   13.32    0.89
  -9  -6  -5   15.24    0.96
   9   6  -5   15.70    1.00
  10   6   5    0.24    0.43
 -10   6  -5    0.14    0.37
 -10  -6   5    0.23    0.31
  10  -6  -5   -0.17    0.49
  10   6   5    0.00    0.43
  10   6  -5    0.21    0.41
 -10   6   5    0.11    0.34
  10  -6   5    0.03    0.36
 -10  -6  -5   -0.14    0.31
 -11   6  -5   11.15    1.06
  11   6   5   13.51    1.14
 -11  -6   5   11.66    0.86
  11   6   5   10.25    1.01
  11  -6  -5   14.75    1.29
  11  -6   5   10.62    0.96
 -11   6   5   11.41    0.95
 -11  -6  -5   10.95    0.96
  11   6  -5   12.88    1.14
   0  -6  -6   19.10    0.68
   0  -6  -6   19.14    0.82
   0   6   6   20.03    0.79
   0  -6   6   20.43    0.73
   0  -6   6   19.90    0.68
   0   6  -6   18.71    0.92
  -1  -6   6   -0.09    0.12
   1  -6  -6    0.29    0.18
  -1  -6   6    0.03    0.12
   1   6   6    0.21    0.17
  -1   6  -6    0.20    0.10
  -1   6  -6    0.13    0.20
   1  -6  -6    0.06    0.13
   1  -6   6   -0.07    0.11
   1  -6   6   -0.17    0.11
  -1  -6  -6   -0.04    0.13
   1   6  -6   -0.24    0.18
  -1  -6  -6   -0.02    0.13
  -1   6   6   -0.03    0.13
  -2  -6   6   12.26    0.57
   2  -6  -6   14.10    0.40
   2   6   6   12.40    0.69
   2  -6  -6   11.98    0.65
  -2   6  -6   12.10    0.74
  -2  -6   6   13.66    0.55
  -2   6  -6   12.31    0.52
   2  -6   6   12.33    0.55
  -2   6   6   12.98    0.54
  -2  -6  -6   13.60    0.63
   2  -6   6   12.90    0.54
  -2  -6  -6   12.13    0.54
   2   6  -6   13.75    0.76
  -2   6   6   12.97    0.53
   3  -6  -6    2.53    0.34
  -3   6  -6    2.79    0.31
   3  -6  -6    2.30    0.22
  -3   6  -6    1.25    0.32
   3   6   6    2.31    0.25
  -3  -6   6    2.64    0.32
   3   6   6    2.15    0.36
  -3  -6  -6    2.58    0.31
   3   6  -6    2.47    0.29
  -3  -6  -6    2.18    0.29
  -3   6   6    1.99    0.26
   3  -6   6    2.27    0.26
  -3   6   6    2.40    0.24
   3  -6   6    2.44    0.30
   3   6  -6    2.56    0.38
  -4   6  -6   71.72    1.97
   4  -6  -6   73.55    1.87
  -4   6  -6   70.92    2.23
   4   6   6   71.02    1.87
   4  -6  -6   69.92    2.12
  -4  -6   6   72.73    1.99
  -4  -6  -6   69.83    1.97
   4  -6   6   71.31    1.87
   4   6  -6   70.45    1.92
   4  -6   6   70.90    1.96
  -4  -6  -6   71.49    1.97
   4   6  -6   70.48    2.12
  -4   6   6   70.44    1.88
  -4   6   6   72.23    1.80
  -5   6  -6    0.65    0.24
   5  -6  -6    0.54    0.24
   5  -6  -6    0.26    0.24
  -5   6  -6    0.11    0.25
   5   6   6    0.31    0.26
   5   6   6    0.61    0.24
  -5  -6   6    0.35    0.20
   5   6  -6    0.11    0.20
  -5   6   6    0.68    0.22
   5  -6   6    0.15    0.23
   5   6  -6    0.38    0.22
  -5  -6  -6    0.40    0.25
   6   6   6   11.40    0.68
   6   6   6    9.58    0.72
   6  -6  -6    9.35    0.63
  -6   6  -6   10.21    0.71
   6  -6  -6   10.24    0.70
  -6   6  -6   10.89    0.67
  -6  -6   6   11.64    0.63
   6  -6   6    9.77    0.67
  -6   6   6    9.60    0.57
  -6  -6  -6    9.95    0.69
   6   6  -6   10.07    0.65
  -7   6  -6    0.48    0.30
  -7   6  -6   -0.29    0.23
   7  -6  -6    0.17    0.26
   7  -6  -6    0.31    0.33
   7   6   6    0.15    0.31
   7   6   6    0.57    0.33
  -7  -6   6    0.13    0.21
  -7  -6  -6    0.05    0.26
  -7   6   6    0.15    0.23
   7  -6   6    0.29    0.28
   7   6  -6   -0.47    0.24
   8  -6  -6   19.61    0.96
   8  -6  -6   18.22    1.13
   8   6   6   18.59    1.08
   8   6   6   21.67    1.08
  -8   6  -6   19.68    1.05
  -8  -6   6   20.50    0.97
   8  -6   6   20.70    1.04
  -8  -6  -6   21.63    1.08
   8   6  -6   18.48    1.01
  -8   6   6   20.30    0.94
   9  -6  -6    0.45    0.45
  -9   6  -6    0.38    0.37
   9   6   6    0.17    0.38
  -9  -6   6   -0.15    0.24
  -9   6   6    0.27    0.32
   9  -6   6    0.19    0.38
  -9  -6  -6   -0.55    0.26
   9   6  -6    0.07    0.34
  10  -6  -6    2.04    0.65
 -10  -6   6    2.53    0.47
  10   6   6    2.31    0.57
 -10   6  -6    3.05    0.58
  10   6  -6    1.69    0.53
 -10  -6  -6    1.45    0.47
 -10   6   6    1.38    0.42
  10  -6   6    1.48    0.48
 -11   6  -6    0.35    0.48
 -11  -6   6    0.74    0.40
  11   6   6    0.05    0.47
  11  -6  -6    0.91    0.58
 -11   6   6    0.45    0.42
   0   6   7    0.23    0.16
   0  -6  -7    0.19    0.17
   0  -6   7    0.14    0.14
   0  -6   7   -0.19    0.11
   0  -6  -7   -0.12    0.12
   0   6  -7   -0.06    0.18
  -1  -6   7    2.60    0.30
   1  -6  -7    2.61    0.37
   1  -6  -7    2.62    0.27
  -1  -6   7    2.46    0.27
  -1   6  -7    3.29    0.46
   1   6   7    3.43    0.40
   1  -6   7    2.66    0.29
   1  -6   7    2.76    0.28
  -1  -6  -7    2.22    0.27
  -1  -6  -7    3.13    0.38
  -1   6   7    2.73    0.31
   1   6  -7    3.10    0.44
   2  -6  -7    0.09    0.20
  -2   6  -7   -0.08    0.19
  -2  -6   7    0.38    0.17
   2   6   7    0.31    0.22
  -2  -6   7    0.14    0.16
   2  -6   7   -0.12    0.15
  -2   6   7    0.04    0.13
   2  -6   7    0.28    0.15
  -2  -6  -7    0.02    0.18
  -2   6   7    0.30    0.15
  -2  -6  -7    0.16    0.15
   2   6  -7    0.34    0.23
  -3  -6   7    9.22    0.53
  -3   6  -7    9.24    0.67
   3   6   7   10.24    0.67
  -3   6  -7    9.52    0.51
   3  -6  -7   11.01    0.66
   3   6  -7    8.54    0.48
   3  -6   7   10.64    0.53
  -3   6   7   10.72    0.51
  -3   6   7   10.02    0.48
   3  -6   7    8.86    0.49
   3   6  -7    8.45    0.63
  -3  -6  -7   10.83    0.60
  -3  -6  -7    9.17    0.51
  -4  -6   7    0.36    0.19
  -4   6  -7    0.48    0.22
  -4   6  -7    0.23    0.25
   4  -6  -7    0.67    0.26
   4   6   7    0.40    0.26
  -4  -6  -7    0.68    0.22
   4   6  -7    0.04    0.20
   4   6  -7    0.71    0.24
  -4   6   7    0.30    0.16
   4  -6   7   -0.07    0.19
   4  -6   7    0.18    0.17
  -4  -6  -7    0.37    0.22
  -4   6   7    0.45    0.19
  -5  -6   7   11.36    0.63
  -5   6  -7    8.31    0.66
   5  -6  -7    9.50    0.65
   5   6   7    9.05    0.69
  -5   6  -7    9.33    0.61
   5   6  -7   11.78    0.69
   5  -6   7    9.75    0.63
  -5  -6  -7   10.88    0.65
  -5   6   7   10.89    0.57
   5   6  -7    9.75    0.58
  -6  -6   7    6.24    0.54
  -6   6  -7    5.32    0.59
   6   6   7    6.86    0.69
  -6   6  -7    6.41    0.59
   6  -6  -7    5.07    0.54
   6   6  -7    6.64    0.58
   6  -6   7    4.96    0.54
  -6  -6  -7    5.16    0.56
  -6   6   7    5.51    0.49
  -7  -6   7    0.63    0.27
   7   6   7    0.39    0.36
   7  -6  -7    0.97    0.33
  -7   6  -7    0.02    0.26
  -7   6  -7    0.59    0.32
   7   6  -7   -0.14    0.28
  -7  -6  -7    0.18    0.29
   7  -6   7    0.25    0.30
  -7   6   7    0.46    0.27
   8   6   7    2.04    0.47
  -8   6  -7    1.70    0.41
  -8  -6   7    1.30    0.36
   8  -6  -7    0.56    0.34
  -8  -6  -7    1.16    0.40
   8   6  -7    0.51    0.34
  -8   6   7    1.16    0.35
   8  -6   7    0.67    0.37
   9   6   7    2.08    0.55
  -9   6  -7    1.68    0.44
  -9  -6   7    2.18    0.42
   9  -6   7    1.27    0.44
  -9  -6  -7    1.73    0.44
  -9   6   7    2.37    0.45
   9   6  -7    1.61    0.47
  10   6   7    0.15    0.45
 -10   6  -7   -0.43    0.32
 -10  -6   7    0.00    0.31
  10   6  -7   -0.15    0.39
 -10   6   7    0.34    0.38
 -10  -6  -7    0.16    0.38
  10  -6   7   -0.02    0.39
   0  -6  -8   14.95    0.81
   0   6   8   15.11    0.73
   0   6  -8   13.71    0.85
   0  -6  -8   15.32    0.63
   0  -6   8   15.42    0.61
   0  -6   8   14.71    0.67
   1  -6  -8    2.04    0.26
  -1  -6   8    2.16    0.27
  -1  -6   8    2.61    0.33
   1   6   8    2.17    0.35
   1  -6  -8    2.20    0.38
  -1   6  -8    1.40    0.39
  -1   6   8    1.99    0.28
  -1  -6  -8    1.79    0.34
   1  -6   8    1.83    0.28
   1  -6   8    1.53    0.24
  -1  -6  -8    1.86    0.27
   1   6  -8    1.63    0.39
   2   6   8   -0.07    0.21
  -2  -6   8    0.80    0.22
  -2  -6   8    0.81    0.21
   2  -6  -8    0.96    0.29
  -2   6  -8    0.53    0.29
  -2  -6  -8    0.55    0.24
   2   6  -8    0.11    0.25
  -2   6   8    0.30    0.19
   2  -6   8    0.52    0.19
  -2   6   8    0.49    0.19
   2  -6   8    0.40    0.19
  -2  -6  -8    0.75    0.21
  -3   6  -8    1.92    0.42
  -3  -6   8    2.26    0.32
   3  -6  -8    2.16    0.39
   3   6   8    1.64    0.36
  -3   6   8    1.87    0.28
   3  -6   8    2.23    0.31
   3   6  -8    2.13    0.42
  -3   6   8    2.55    0.29
   3   6  -8    1.67    0.28
  -3  -6  -8    2.78    0.41
  -3  -6  -8    2.05    0.30
   3  -6   8    2.39    0.32
  -4  -6   8    3.03    0.38
   4   6   8    3.17    0.49
  -4   6  -8    2.80    0.45
   4  -6  -8    2.49    0.41
   4  -6   8    2.94    0.38
  -4  -6  -8    3.43    0.42
  -4   6   8    3.21    0.32
   4   6  -8    2.52    0.34
   4  -6   8    3.25    0.38
   4   6  -8    2.04    0.39
  -4   6   8    2.98    0.34
   5   6   8    0.65    0.33
   5  -6  -8    0.46    0.28
  -5   6  -8    0.45    0.25
  -5  -6   8    0.58    0.24
  -5   6  -8    0.66    0.32
   5  -6   8    0.99    0.31
   5   6  -8    0.39    0.27
  -5   6   8    0.74    0.25
  -5  -6  -8    0.82    0.28
   5   6  -8    0.80    0.26
  -6  -6   8    3.20    0.42
   6  -6  -8    3.33    0.48
  -6   6  -8    2.48    0.46
   6   6   8    2.22    0.46
  -6   6  -8    1.56    0.36
   6  -6   8    1.95    0.42
   6   6  -8    2.89    0.44
  -6  -6  -8    2.85    0.45
  -6   6   8    2.79    0.39
   7  -6  -8    3.21    0.50
  -7   6  -8    3.72    0.50
   7   6   8    2.82    0.52
  -7  -6   8    2.59    0.41
  -7   6  -8    3.04    0.52
  -7   6   8    2.63    0.40
   7   6  -8    2.87    0.48
  -7  -6  -8    3.10    0.51
   7  -6   8    3.06    0.50
   8   6   8    2.12    0.50
  -8   6  -8    2.49    0.46
   8  -6  -8    1.29    0.41
  -8  -6   8    1.56    0.38
  -8  -6  -8    1.93    0.45
   8   6  -8    2.53    0.51
  -8   6   8    1.88    0.41
   8  -6   8    1.75    0.43
  -9   6  -8    0.28    0.34
   9   6   8    0.11    0.40
  -9  -6   8    0.27    0.30
   9  -6  -8    0.24    0.35
  -9  -6  -8    0.58    0.36
  -9   6   8    0.17    0.31
   9  -6   8    0.49    0.42
   9   6  -8    0.64    0.44
 -10  -6   8    7.31    0.75
 -10   6  -8    7.68    0.81
  10   6   8    7.55    0.87
  10  -6   8    7.69    0.81
 -10  -6  -8    6.23    0.75
  10   6  -8    7.71    0.92
 -10   6   8    7.00    0.74
   0   6  -9    0.23    0.28
   0   6   9    0.07    0.20
   0  -6   9    0.15    0.18
   0  -6  -9   -0.10    0.16
   0  -6  -9    0.21    0.23
   0  -6   9    0.19    0.18
   1  -6  -9    1.51    0.35
  -1   6  -9    1.86    0.41
  -1  -6   9    2.42    0.29
   1  -6  -9    2.06    0.28
  -1  -6   9    2.12    0.32
   1   6   9    2.13    0.37
   1  -6   9    2.37    0.30
  -1   6   9    2.17    0.31
  -1  -6  -9    1.69    0.28
  -1  -6  -9    2.81    0.46
   1  -6   9    2.50    0.34
   1   6  -9    1.15    0.37
  -2   6  -9    0.15    0.29
   2   6   9    0.57    0.28
  -2  -6   9    0.76    0.23
  -2  -6   9    0.46    0.19
   2  -6  -9    0.20    0.24
   2   6  -9    0.23    0.27
  -2   6   9    0.30    0.20
   2  -6   9    0.52    0.23
   2  -6   9    0.62    0.22
  -2  -6  -9    0.24    0.28
  -2   6   9    0.56    0.22
  -2  -6  -9    0.51    0.20
   3   6   9   10.05    0.72
  -3   6  -9    8.00    0.75
  -3  -6   9    9.93    0.60
   3  -6  -9    9.76    0.69
   3   6  -9   11.40    0.79
   3  -6   9   10.29    0.57
   3  -6   9   10.04    0.61
  -3   6   9   10.51    0.57
  -3  -6  -9    9.41    0.56
  -3   6   9   11.27    0.57
  -3  -6  -9   11.77    0.76
   3   6  -9   10.57    0.56
  -4   6  -9    0.32    0.31
   4   6   9    0.55    0.30
  -4  -6   9   -0.02    0.20
   4  -6  -9    0.12    0.25
  -4   6   9    0.18    0.21
   4   6  -9    0.50    0.23
   4  -6   9    0.27    0.23
   4  -6   9    0.15    0.23
  -4  -6  -9    0.18    0.22
   4   6  -9    0.46    0.30
  -4   6   9    0.38    0.21
  -5  -6   9   27.61    1.11
   5   6   9   30.21    1.32
  -5   6  -9   32.88    1.36
   5  -6  -9   28.86    1.26
   5   6  -9   29.06    1.12
  -5  -6  -9   28.35    1.16
  -5   6   9   29.19    1.06
   5   6  -9   28.51    1.24
   5  -6   9   28.72    1.12
   6   6   9    2.40    0.49
  -6  -6   9    2.38    0.39
   6  -6  -9    2.60    0.47
  -6   6  -9    1.69    0.41
   6   6  -9    1.99    0.39
   6   6  -9    2.16    0.42
  -6  -6  -9    2.05    0.41
   6  -6   9    1.94    0.40
  -6   6   9    2.57    0.39
  -7  -6   9    1.57    0.35
   7  -6  -9    1.04    0.40
  -7   6  -9    2.06    0.47
   7   6   9    1.55    0.48
   7   6  -9    1.75    0.43
   7  -6   9    1.40    0.41
  -7  -6  -9    0.73    0.35
  -7   6   9    2.10    0.38
  -8   6  -9    0.65    0.35
   8   6   9    0.14    0.37
  -8  -6   9    0.31    0.28
   8  -6  -9    0.50    0.37
   8  -6   9    0.41    0.37
  -8   6   9    0.85    0.36
  -8  -6  -9    0.29    0.34
   8   6  -9    0.30    0.35
  -9  -6   9    0.25    0.32
   9  -6  -9    0.20    0.39
  -9   6  -9   -0.16    0.34
   9   6   9    0.76    0.41
   9  -6   9    0.31    0.42
  -9   6   9    0.07    0.33
   9   6  -9    0.71    0.45
  -9  -6  -9    0.62    0.39
   0  -6 -10   58.98    1.68
   0  -6 -10   59.80    2.12
   0   6 -10   61.30    2.21
   0  -6  10   61.65    1.83
   0  -6  10   58.72    1.65
   0   6  10   61.10    1.88
  -1  -6  10    0.90    0.27
   1   6  10    1.16    0.31
   1  -6 -10    0.98    0.25
   1  -6 -10    1.34    0.37
  -1   6 -10    1.21    0.39
  -1  -6  10    1.53    0.26
  -1  -6 -10    1.39    0.26
   1   6 -10    1.58    0.42
  -1   6  10    0.92    0.27
   1  -6  10    1.34    0.29
   1  -6  10    1.33    0.26
  -1  -6 -10    0.89    0.37
  -2   6 -10   17.70    1.04
   2  -6 -10   18.50    1.02
  -2  -6  10   19.20    0.76
  -2  -6  10   17.51    0.83
   2   6  10   18.11    0.95
   2   6 -10   18.87    1.09
   2  -6  10   17.91    0.85
   2  -6  10   18.22    0.75
  -2  -6 -10   19.08    0.79
  -2  -6 -10   18.68    1.05
  -2   6  10   18.75    0.81
  -2   6  10   18.67    0.77
  -3  -6  10    0.23    0.22
  -3   6 -10   -0.10    0.29
   3   6  10   -0.05    0.24
   3  -6 -10    0.21    0.26
   3  -6  10    0.11    0.21
  -3   6  10    0.09    0.19
  -3  -6 -10   -0.08    0.21
   3  -6  10    0.23    0.24
   3   6 -10   -0.01    0.21
   3   6 -10    0.13    0.27
  -3   6  10    0.32    0.21
  -3  -6 -10    0.02    0.26
   4   6  10   36.29    1.50
   4  -6 -10   36.47    1.50
  -4   6 -10   37.28    1.56
  -4  -6  10   36.69    1.33
   4  -6  10   39.53    1.38
  -4   6  10   35.99    1.22
   4  -6  10   37.09    1.27
  -4  -6 -10   37.28    1.33
   4   6 -10   36.20    1.25
  -4   6  10   36.41    1.23
   4   6 -10   35.19    1.51
  -5   6 -10    0.26    0.31
  -5  -6  10    0.86    0.29
   5   6  10    0.65    0.39
   5  -6 -10    0.29    0.30
   5  -6  10    1.06    0.34
  -5   6  10    0.85    0.27
   5   6 -10    0.82    0.36
   5   6 -10    0.92    0.30
  -5  -6 -10    0.69    0.30
   6   6  10    5.36    0.66
  -6  -6  10    5.05    0.55
  -6   6 -10    4.78    0.63
   6  -6 -10    6.28    0.67
   6   6 -10    5.24    0.62
   6  -6  10    4.72    0.55
   6   6 -10    4.27    0.52
  -6  -6 -10    5.80    0.63
  -6   6  10    4.69    0.49
   7   6  10   -0.20    0.35
  -7  -6  10    0.19    0.27
   7  -6 -10    0.09    0.31
   7  -6  10   -0.31    0.32
  -7  -6 -10   -0.38    0.26
   7   6 -10    0.04    0.32
  -7   6  10   -0.11    0.27
  -8  -6  10   18.88    0.98
   8   6  10   17.82    1.10
   8  -6 -10   19.32    1.08
  -8  -6 -10   16.78    1.03
   8  -6  10   21.22    1.08
   8   6 -10   18.63    1.11
  -8   6  10   17.94    0.94
   9   6  10    0.57    0.47
   9  -6 -10    0.64    0.43
  -9  -6  10    0.83    0.40
  -9   6  10    0.76    0.41
   9  -6  10    1.31    0.45
  -9  -6 -10    0.50    0.40
   9   6 -10    0.35    0.42
   0   6  11    0.18    0.26
   0  -6  11   -0.17    0.19
   0  -6  11    0.10    0.22
   0  -6 -11   -0.03    0.29
   0  -6 -11    0.24    0.21
   0   6 -11   -0.10    0.30
   1  -6 -11   68.08    1.87
   1   6  11   65.15    2.12
  -1   6 -11   69.31    2.43
   1  -6 -11   68.43    2.36
  -1  -6  11   64.23    2.01
  -1  -6  11   68.27    1.84
  -1  -6 -11   68.08    2.39
  -1  -6 -11   65.70    1.88
   1   6 -11   62.97    2.39
  -1   6  11   67.52    2.02
   1  -6  11   67.39    1.84
   1  -6  11   65.54    2.02
   2   6  11    0.20    0.29
  -2  -6  11    0.37    0.24
  -2  -6  11    0.85    0.26
  -2   6 -11    1.08    0.41
   2  -6 -11    0.73    0.34
  -2  -6 -11    0.15    0.31
  -2  -6 -11    0.88    0.26
  -2   6  11    0.90    0.28
   2  -6  11    0.57    0.25
   2   6 -11    0.39    0.34
  -2   6  11    0.47    0.23
   2  -6  11    0.59    0.29
   3   6  11   17.80    1.01
  -3   6 -11   18.21    1.09
  -3  -6  11   18.42    0.89
   3  -6 -11   18.18    1.04
   3   6 -11   17.67    0.81
  -3  -6 -11   17.99    1.09
  -3   6  11   20.01    0.87
  -3  -6 -11   17.43    0.83
   3  -6  11   18.44    0.81
  -3   6  11   19.39    0.83
   3  -6  11   21.37    0.98
   4  -6 -11    1.10    0.38
  -4  -6  11    0.66    0.30
  -4   6 -11    0.54    0.36
   4   6  11    1.18    0.40
  -4  -6 -11    0.77    0.31
   4   6 -11    1.22    0.42
   4   6 -11    0.78    0.27
  -4   6  11    1.08    0.29
   4  -6  11    1.15    0.33
   4  -6  11    0.76    0.32
  -4   6  11    1.01    0.29
  -5  -6  11    3.06    0.45
   5  -6 -11    3.47    0.57
   5   6  11    2.88    0.58
  -5   6 -11    2.96    0.54
  -5   6  11    3.20    0.43
  -5  -6 -11    4.22    0.53
   5  -6  11    3.52    0.48
   5   6 -11    2.77    0.52
   5   6 -11    2.84    0.44
  -6  -6  11    0.07    0.25
   6  -6 -11   -0.04    0.33
   6   6  11   -0.07    0.34
  -6   6 -11    0.28    0.33
  -6   6  11    0.18    0.27
   6   6 -11    0.09    0.31
  -6  -6 -11   -0.54    0.25
   6   6 -11    0.21    0.35
   6  -6  11   -0.36    0.30
   7   6  11   16.86    1.11
   7  -6 -11   16.97    1.03
  -7  -6  11   19.03    0.98
  -7   6  11   17.20    0.91
   7  -6  11   16.70    0.96
   7   6 -11   19.61    1.07
  -7  -6 -11   15.85    1.00
   8  -6 -11    0.61    0.41
   8   6  11   -0.04    0.40
  -8  -6  11    0.57    0.36
  -8  -6 -11    0.75    0.44
   8   6 -11    0.13    0.41
   8  -6  11   -0.46    0.37
  -8   6  11    0.03    0.31
   0  -6  12   73.42    2.25
   0   6  12   76.51    2.31
   0   6 -12   74.98    2.68
   0  -6 -12   75.43    2.66
   0  -6 -12   73.19    2.06
  -1   6 -12    0.42    0.37
   1  -6 -12   -0.12    0.20
   1  -6 -12    0.40    0.34
   1   6  12    0.63    0.33
  -1  -6  12    0.41    0.27
   1   6 -12    0.17    0.36
   1  -6  12    0.00    0.23
  -1   6  12    0.37    0.29
  -1  -6 -12   -0.02    0.20
  -1   6  12    0.10    0.22
  -1  -6 -12    0.36    0.36
   2  -6 -12   72.47    2.54
   2   6  12   73.10    2.35
  -2   6 -12   74.81    2.60
  -2  -6  12   69.15    2.18
   2   6 -12   67.34    2.56
   2  -6  12   75.94    2.26
  -2  -6 -12   72.05    2.06
  -2   6  12   74.25    2.17
  -2   6  12   71.78    2.02
  -2  -6 -12   65.37    2.53
  -3   6 -12   -0.20    0.28
  -3  -6  12    0.41    0.28
   3   6  12    0.54    0.35
   3  -6 -12   -0.15    0.30
   3   6 -12    0.05    0.33
  -3  -6 -12    0.29    0.25
  -3   6  12    0.06    0.25
  -3   6  12    0.22    0.23
  -3  -6 -12   -0.37    0.33
   3  -6  12   -0.17    0.26
  -4   6 -12    9.72    0.91
   4  -6 -12    9.74    0.90
  -4  -6  12   12.51    0.76
   4   6  12   12.15    0.92
  -4   6  12   10.87    0.67
   4  -6  12   12.10    0.82
   4   6 -12   11.47    0.91
  -4   6  12   10.44    0.67
  -4  -6 -12   11.30    0.73
  -5  -6  12    0.78    0.34
   5   6  12    0.76    0.42
   5  -6 -12    1.09    0.42
  -5   6 -12    0.75    0.38
   5   6 -12    1.01    0.45
  -5  -6 -12    1.01    0.35
  -5   6  12    0.51    0.31
  -6   6 -12   20.22    1.19
  -6  -6  12   22.42    1.07
   6  -6 -12   19.65    1.16
   6   6  12   23.96    1.27
  -6   6  12   21.18    0.98
   6   6 -12   22.66    1.22
  -6  -6 -12   20.61    1.10
  -7  -6  12    0.92    0.39
   7  -6 -12    0.51    0.40
   7   6  12    0.53    0.42
  -7   6  12    0.88    0.36
  -7  -6 -12    0.69    0.41
   0   6  13    0.14    0.30
   0   6 -13    0.15    0.36
   0  -6 -13   -0.04    0.38
   0  -6  13   -0.07    0.25
   0  -6 -13   -0.30    0.21
   1  -6 -13   60.81    2.32
  -1   6 -13   59.66    2.32
  -1  -6  13   56.03    1.92
   1   6  13   60.08    2.04
   1   6 -13   57.08    2.32
   1  -6  13   55.88    1.94
  -1  -6 -13   56.09    1.75
  -1   6  13   56.27    1.75
  -1   6  13   59.18    1.92
  -1  -6 -13   59.73    2.36
  -2   6 -13    1.97    0.54
  -2  -6  13    1.85    0.40
   2  -6 -13    2.17    0.55
   2   6  13    1.73    0.48
   2  -6  13    2.21    0.46
  -2  -6 -13    1.89    0.38
  -2   6  13    2.30    0.39
  -2   6  13    2.09    0.41
  -2  -6 -13    2.73    0.62
   2   6 -13    1.75    0.52
   3  -6 -13   72.86    2.55
   3   6  13   65.92    2.32
  -3  -6  13   66.50    2.17
  -3   6 -13   68.38    2.51
  -3  -6 -13   68.84    2.06
   3  -6  13   71.01    2.28
   3   6 -13   66.34    2.55
  -3  -6 -13   66.29    2.53
  -3   6  13   65.12    1.97
  -3   6  13   68.37    2.10
  -4   6 -13    0.55    0.40
  -4  -6  13    0.19    0.28
   4  -6 -13    0.30    0.37
   4   6  13    0.41    0.42
  -4  -6 -13    0.42    0.32
  -4   6  13   -0.16    0.27
   4  -6  13   -0.02    0.33
  -4   6  13    0.36    0.28
   4   6 -13    0.42    0.41
  -5  -6  13   69.05    2.23
   5  -6 -13   71.76    2.51
  -5   6 -13   65.31    2.45
   5   6  13   69.35    2.42
  -5   6  13   66.58    2.04
   5   6 -13   70.68    2.54
  -5  -6 -13   68.06    2.19
   6   6  13   -0.84    0.38
   6  -6 -13    0.28    0.43
  -6   6 -13    0.65    0.43
  -6  -6  13    0.64    0.34
  -6  -6 -13    0.50    0.39
   6   6 -13   -0.29    0.36
   7  -6 -13   46.09    1.96
  -7  -6 -13   49.55    1.86
   0   6  14   35.48    1.48
   0  -6 -14   33.90    1.25
   0  -6  14   32.44    1.42
   0  -6 -14   34.73    1.76
   0   6 -14   37.64    1.80
  -1   6 -14    0.24    0.39
   1   6  14    0.12    0.35
   1  -6 -14    0.09    0.38
  -1  -6  14    0.14    0.30
  -1  -6 -14    0.33    0.44
  -1   6  14    0.43    0.34
  -1  -6 -14   -0.03    0.26
   1   6 -14    0.42    0.45
   1  -6  14    0.69    0.37
  -1   6  14    0.06    0.27
  -2  -6  14   60.10    2.05
   2  -6 -14   63.64    2.46
  -2   6 -14   63.57    2.45
   2   6  14   64.19    2.24
   2  -6  14   62.78    2.15
   2   6 -14   55.15    2.39
  -2  -6 -14   60.48    1.88
  -2  -6 -14   58.17    2.42
  -2   6  14   61.06    2.02
  -2   6  14   56.95    1.82
  -3  -6  14    0.17    0.32
   3   6  14    0.38    0.45
  -3   6 -14   -0.09    0.39
   3  -6 -14    0.48    0.43
  -3   6  14    0.43    0.31
  -3  -6 -14    0.87    0.33
  -3   6  14    0.27    0.30
   3   6 -14    0.45    0.43
   3  -6  14    0.02    0.36
  -4  -6  14   73.19    2.43
   4   6  14   79.98    2.67
  -4   6 -14   74.90    2.76
   4  -6 -14   81.98    2.85
   4  -6  14   76.60    2.56
  -4   6  14   77.39    2.36
   4   6 -14   80.87    2.89
  -4  -6 -14   76.73    2.35
  -5  -6  14   -0.16    0.30
   5  -6 -14    0.36    0.44
   5   6  14   -0.09    0.39
  -5   6 -14    0.30    0.40
  -5  -6 -14   -0.20    0.34
   5   6 -14    0.63    0.48
   0  -6 -15   -0.17    0.26
   0   6  15    0.61    0.40
   0  -6 -15   -0.07    0.45
   0   6 -15    0.55    0.48
   0  -6  15   -0.16    0.30
   1  -6 -15   61.25    2.48
  -1  -6  15   52.74    2.01
   1   6  15   59.65    2.14
  -1   6 -15   60.45    2.46
  -1  -6 -15   57.60    1.82
  -1  -6 -15   60.57    2.48
   1   6 -15   53.36    2.40
   1  -6  15   56.60    2.08
  -1   6  15   56.99    2.02
  -2   6 -15   -0.06    0.39
   2  -6 -15   -0.07    0.39
   2   6  15    0.29    0.42
  -2  -6  15   -0.67    0.27
  -2  -6 -15    0.42    0.32
  -2   6  15    0.17    0.33
   2  -6  15    0.00    0.37
  -2  -6 -15   -0.14    0.41
   2   6 -15    0.13    0.46
  -3  -6  15   74.31    2.49
   3   6  15   77.05    2.69
  -3   6 -15   77.29    2.87
   3  -6 -15   82.92    2.96
  -3  -6 -15   77.87    2.36
   3   6 -15   79.82    3.01
  -3   6  15   74.01    2.41
   3  -6  15   78.34    2.63
  -4   6 -15   -0.03    0.39
   4  -6  15   -0.23    0.38
   4   6 -15    0.41    0.44
  -4  -6 -15   -0.31    0.28
  -4   6  15    0.28    0.32
   0   6  16   57.01    2.17
   0  -6 -16   61.13    2.60
   0  -6  16   60.76    2.21
  -1   6  16    0.44    0.41
  -1  -6 -16   -0.01    0.49
   1  -6  16    0.04    0.36
   0  -7   0   -0.10    0.09
   0  -7   0   -0.06    0.10
   0  -7   0   -0.15    0.09
   0  -7   0    0.07    0.15
   1  -7   0    0.01    0.11
   1  -7   0    0.46    0.12
  -1  -7   0   -0.01    0.09
  -1  -7   0    0.41    0.13
  -1  -7   0   -0.09    0.12
   1  -7   0    0.18    0.15
  -1  -7   0    0.01    0.11
  -1   7   0   -0.05    0.09
  -2  -7   0   15.62    0.51
  -2  -7   0   15.30    0.62
  -2  -7   0   15.03    0.60
   2  -7   0   15.15    0.55
   2  -7   0   15.48    0.48
  -2   7   0   16.37    0.54
  -2  -7   0   15.69    0.53
   2  -7   0   15.48    0.66
   3   7   0    0.22    0.14
  -3  -7   0    0.01    0.13
  -3   7   0    0.01    0.12
  -3  -7   0    0.00    0.10
   3  -7   0    0.11    0.13
   3   7   0    0.07    0.14
   3  -7   0    0.16    0.16
  -4  -7   0    5.48    0.40
   4  -7   0    5.37    0.39
  -4  -7   0    5.71    0.36
   4   7   0    5.73    0.34
   4  -7   0    5.95    0.44
  -4   7   0    5.41    0.36
   4   7   0    5.63    0.38
  -5  -7   0    0.75    0.22
  -5   7   0    0.35    0.17
   5  -7   0    0.14    0.20
  -5  -7   0    0.18    0.17
   5   7   0    0.39    0.19
   5  -7   0    0.29    0.20
   6  -7   0   -0.11    0.18
  -6  -7   0    0.06    0.19
  -6  -7   0    0.14    0.20
   6  -7   0   -0.03    0.22
  -6   7   0   -0.12    0.17
   6   7   0    0.33    0.22
   7   7   0   -0.01    0.24
  -7  -7   0    0.04    0.22
   7  -7   0   -0.28    0.25
  -7   7   0    0.60    0.27
  -7  -7   0    0.26    0.27
   7  -7   0    0.25    0.26
   8  -7   0    0.56    0.36
   8   7   0    0.38    0.31
  -8  -7   0    1.29    0.38
  -8   7   0    0.32    0.26
  -8  -7   0    0.26    0.25
   8  -7   0    0.32    0.28
   9  -7   0   -0.31    0.34
   9   7   0    0.07    0.33
  -9  -7   0    0.07    0.27
  -9  -7   0   -0.15    0.31
  -9   7   0    0.09    0.28
 -10  -7   0   -0.25    0.28
  10   7   0    0.58    0.42
  10  -7   0    0.30    0.43
 -10  -7   0   -0.66    0.31
 -10   7   0   -0.16    0.31
  11  -7   0    0.38    0.48
  11   7   0    0.29    0.44
 -11   7   0    0.20    0.37
 -11  -7   0   -0.24    0.27
 -11  -7   0    0.07    0.39
   0  -7  -1    0.24    0.10
   0  -7  -1    0.81    0.13
   0  -7   1    0.19    0.15
   0  -7   1    0.26    0.11
   0  -7  -1    0.49    0.15
   0  -7   1    0.19    0.10
   0   7  -1    0.22    0.08
   0  -7  -1    0.49    0.14
   1  -7  -1    0.98    0.16
  -1   7  -1    0.81    0.13
   1  -7  -1    1.86    0.25
  -1  -7   1    0.70    0.14
  -1  -7   1    0.83    0.16
  -1  -7   1    0.70    0.11
   1  -7  -1    0.71    0.13
  -1  -7  -1    0.82    0.18
   1  -7   1    0.72    0.12
  -1   7   1    0.66    0.13
  -1  -7  -1    1.00    0.15
  -1  -7  -1    0.73    0.13
   1  -7   1    0.68    0.14
   1  -7   1    0.56    0.18
  -1  -7  -1    0.81    0.18
   1   7  -1    1.10    0.21
  -2   7  -1   42.57    1.11
  -2  -7   1   43.97    1.06
  -2  -7   1   43.47    1.14
   2  -7  -1   40.13    1.12
  -2  -7   1   42.01    1.21
   2  -7  -1   40.96    1.31
  -2   7   1   42.75    1.07
   2  -7   1   44.24    1.05
  -2   7   1   42.50    1.13
  -2  -7  -1   41.64    1.11
  -2  -7  -1   43.48    1.11
   2   7  -1   39.79    1.29
  -2  -7  -1   43.10    1.25
   2  -7   1   42.70    1.16
  -2  -7  -1   41.65    1.26
   2  -7   1   40.64    1.32
   3  -7  -1    1.02    0.19
  -3   7  -1    0.60    0.16
   3   7   1    0.72    0.17
  -3  -7   1    0.81    0.14
   3  -7  -1    0.41    0.18
  -3  -7   1    0.78    0.19
   3  -7   1    0.69    0.18
  -3   7   1    0.89    0.17
  -3  -7  -1    0.68    0.16
  -3  -7  -1    0.62    0.19
   3   7  -1    0.76    0.19
   3  -7   1    1.15    0.24
  -3  -7  -1    0.73    0.15
   3   7  -1    0.80    0.17
   4   7   1   33.39    1.02
   4   7   1   33.33    0.99
  -4  -7   1   32.87    1.09
  -4  -7   1   32.85    0.98
  -4   7  -1   32.01    1.01
   4  -7  -1   32.60    1.14
   4  -7  -1   35.38    1.09
  -4  -7  -1   31.71    1.13
   4   7  -1   34.97    1.06
  -4  -7  -1   34.23    1.04
   4   7  -1   32.83    1.02
   4  -7   1   34.04    1.10
  -4   7   1   32.42    1.02
   4  -7   1   33.43    1.16
  -5  -7   1    0.16    0.17
  -5   7  -1    0.16    0.16
  -5  -7   1    0.47    0.18
   5  -7  -1    0.08    0.17
   5   7   1    0.00    0.17
   5  -7  -1    0.30    0.21
   5  -7   1    0.03    0.17
  -5   7   1    0.06    0.15
   5  -7   1    0.15    0.19
  -5  -7  -1    0.07    0.16
   5   7  -1    0.18    0.17
  -5  -7  -1    0.28    0.18
   6  -7  -1   20.41    0.97
  -6  -7   1   22.29    0.93
   6   7   1   20.27    0.89
  -6   7  -1   24.05    0.92
  -6  -7   1   24.20    0.94
   6  -7  -1   21.88    0.93
  -6  -7  -1   21.73    0.94
  -6   7   1   22.59    0.88
   6  -7   1   24.06    0.96
  -6  -7  -1   22.70    0.96
   6  -7   1   20.87    0.97
   6   7  -1   23.06    0.92
  -7   7  -1    0.09    0.22
  -7  -7   1    0.47    0.25
  -7  -7   1    0.27    0.25
   7  -7  -1    0.16    0.23
   7   7   1    0.08    0.24
   7  -7  -1    0.32    0.29
   7  -7   1    0.24    0.25
  -7  -7  -1    0.16    0.25
  -7  -7  -1    0.03    0.21
   7  -7   1   -0.29    0.22
  -7   7   1   -0.07    0.21
   7   7  -1    0.18    0.25
   8  -7  -1    6.34    0.57
   8   7   1    6.50    0.64
   8  -7  -1    5.50    0.68
  -8   7  -1    5.43    0.58
  -8  -7   1    6.51    0.66
  -8  -7   1    6.24    0.60
  -8  -7  -1    5.60    0.61
  -8   7   1    7.01    0.61
  -8  -7  -1    6.69    0.65
   8  -7   1    5.92    0.58
   8   7  -1    6.95    0.68
   8  -7   1    5.59    0.67
  -9   7  -1   -0.30    0.27
  -9  -7   1    0.61    0.29
   9   7   1    0.45    0.37
   9  -7  -1    0.79    0.44
  -9  -7   1    0.18    0.35
   9  -7   1    0.24    0.37
  -9   7   1    0.20    0.27
   9   7  -1    0.68    0.36
  -9  -7  -1    0.40    0.36
  -9  -7  -1    0.68    0.33
 -10  -7   1   -0.36    0.35
  10  -7  -1    0.82    0.50
 -10   7  -1    0.09    0.30
 -10  -7   1    0.30    0.34
  10   7   1    0.33    0.42
 -10  -7  -1   -0.07    0.34
  10   7  -1    0.52    0.44
  10  -7   1   -0.02    0.42
 -10  -7  -1   -0.06    0.28
 -10   7   1    0.11    0.31
  11   7   1    0.25    0.48
 -11  -7   1    0.25    0.35
 -11   7  -1    0.35    0.38
  11  -7  -1   -0.22    0.45
  11   7  -1   -0.42    0.43
 -11  -7  -1    0.53    0.43
  11  -7   1   -0.17    0.42
 -11  -7  -1   -0.05    0.33
 -11   7   1    0.33    0.37
   0   7  -2    0.11    0.15
   0  -7   2   -0.02    0.09
   0  -7   2    0.00    0.10
   0  -7  -2   -0.10    0.09
   0   7   2    0.19    0.14
   0  -7  -2    0.07    0.13
   0   7  -2   -0.02    0.07
   0  -7  -2    0.01    0.08
  -1  -7   2    4.90    0.28
  -1   7  -2    4.58    0.23
  -1   7  -2    4.61    0.41
  -1  -7   2    4.20    0.19
   1  -7  -2    4.54    0.25
  -1  -7   2    3.87    0.28
   1  -7  -2    4.15    0.32
  -1  -7  -2    3.95    0.23
   1  -7   2    4.07    0.27
  -1   7   2    4.38    0.26
   1  -7   2    3.93    0.23
  -1  -7  -2    4.65    0.31
   1   7  -2    3.83    0.39
  -1  -7  -2    4.64    0.26
  -1  -7  -2    4.70    0.36
  -1   7   2    3.92    0.30
   2  -7  -2    0.02    0.14
  -2   7  -2   -0.03    0.14
  -2  -7   2    0.03    0.08
   2  -7  -2   -0.15    0.09
  -2  -7   2    0.01    0.11
  -2  -7   2    0.12    0.12
  -2   7  -2    0.00    0.09
   2   7   2   -0.02    0.09
  -2  -7  -2    0.12    0.11
  -2   7   2    0.05    0.08
   2  -7   2    0.10    0.12
  -2  -7  -2   -0.21    0.11
   2  -7   2   -0.05    0.06
  -2  -7  -2    0.00    0.13
   2   7  -2    0.13    0.15
  -2   7   2    0.03    0.11
  -3   7  -2   41.49    1.36
   3  -7  -2   40.98    1.15
  -3  -7   2   41.83    1.05
   3  -7  -2   40.65    1.30
   3   7   2   41.34    1.13
  -3   7  -2   40.90    1.14
  -3  -7   2   39.96    1.23
  -3  -7  -2   43.90    1.21
   3  -7   2   40.04    0.98
   3  -7   2   39.72    1.33
   3   7  -2   41.43    1.17
  -3  -7  -2   42.57    1.17
  -3   7   2   42.16    0.98
   3   7  -2   42.21    1.33
   3  -7   2   41.87    1.21
  -3   7   2   40.35    1.15
  -3  -7  -2   41.63    1.32
  -4  -7   2    0.00    0.14
   4   7   2    0.05    0.15
   4  -7  -2    0.09    0.15
  -4  -7   2    0.08    0.11
  -4   7  -2   -0.01    0.13
   4  -7  -2   -0.05    0.14
   4   7  -2    0.29    0.16
  -4  -7  -2    0.01    0.11
  -4  -7  -2   -0.01    0.17
   4  -7   2    0.08    0.16
   4  -7   2    0.02    0.18
  -4  -7  -2    0.60    0.18
  -4   7   2    0.08    0.14
   4   7  -2    0.03    0.14
  -5  -7   2   29.88    1.04
  -5   7  -2   28.18    0.99
   5  -7  -2   30.11    1.09
   5  -7  -2   28.14    1.06
  -5   7  -2   29.05    1.09
   5   7   2   28.79    0.99
  -5  -7   2   29.12    0.96
   5  -7   2   28.44    1.08
  -5  -7  -2   26.60    1.08
  -5  -7  -2   28.85    1.03
   5   7  -2   29.36    1.01
  -5   7   2   29.14    0.98
   5  -7   2   28.99    1.08
  -6  -7   2    0.42    0.22
  -6   7  -2    0.39    0.21
   6   7   2    0.65    0.26
  -6   7  -2    0.70    0.24
   6  -7  -2    1.07    0.28
  -6  -7   2    0.68    0.23
   6  -7  -2    0.40    0.26
   6  -7   2    0.39    0.23
  -6  -7  -2    0.95    0.28
   6   7  -2    0.30    0.21
  -6   7   2    0.26    0.20
  -6  -7  -2    0.66    0.25
   6  -7   2    0.10    0.22
  -7  -7   2   14.74    0.79
  -7   7  -2   17.58    0.85
   7   7   2   16.57    0.86
   7  -7  -2   17.69    0.83
  -7  -7   2   15.11    0.82
  -7   7  -2   17.29    0.82
   7  -7  -2   13.81    0.87
   7   7  -2   16.90    0.85
  -7  -7  -2   15.23    0.86
  -7   7   2   18.74    0.82
   7  -7   2   17.45    0.93
  -7  -7  -2   16.00    0.86
  -8  -7   2    0.69    0.29
   8  -7  -2    1.19    0.40
   8   7   2    1.31    0.39
  -8  -7   2    0.46    0.32
   8  -7  -2    1.25    0.33
  -8   7  -2    0.79    0.34
  -8   7  -2    0.67    0.28
   8   7  -2   -0.08    0.27
  -8   7   2    0.80    0.29
  -8  -7  -2    0.70    0.29
   8  -7   2    0.15    0.34
  -8  -7  -2    0.86    0.34
  -9   7  -2    5.19    0.61
   9  -7  -2    7.27    0.81
   9   7   2    6.07    0.68
  -9  -7   2    5.00    0.59
  -9  -7  -2    6.36    0.70
  -9   7   2    4.96    0.57
   9   7  -2    4.54    0.61
   9  -7   2    5.40    0.71
  -9  -7  -2    6.24    0.67
 -10  -7   2   -0.28    0.26
 -10   7  -2   -0.20    0.34
  10  -7  -2   -0.06    0.41
  10   7   2   -0.24    0.38
  10  -7   2   -0.10    0.37
 -10   7   2    0.18    0.34
 -10  -7  -2   -0.12    0.34
 -10  -7  -2    0.56    0.36
  10   7  -2   -0.08    0.35
 -11   7  -2    4.72    0.73
  11   7   2    4.12    0.71
  11  -7  -2    5.39    0.79
 -11  -7   2    5.01    0.65
 -11  -7  -2    5.98    0.76
  11   7  -2    4.61    0.75
 -11   7   2    5.10    0.71
 -11  -7  -2    3.49    0.61
  11  -7   2    4.35    0.71
   0   7   3   91.03    2.41
   0  -7   3   91.12    2.24
   0  -7  -3   95.11    2.12
   0   7  -3   94.82    2.07
   0   7  -3   95.89    2.60
   0  -7  -3   92.00    2.20
   0  -7   3   93.43    2.23
   0  -7  -3   91.96    2.45
  -1  -7   3    0.51    0.15
  -1   7  -3    0.60    0.11
   1  -7  -3    0.75    0.18
  -1  -7   3    0.37    0.14
   1  -7  -3    0.67    0.12
  -1   7  -3    0.92    0.23
   1   7   3    0.68    0.21
   1   7  -3    0.59    0.08
   1   7  -3    0.54    0.21
   1  -7   3    0.49    0.11
   1  -7   3    0.52    0.14
  -1  -7  -3    0.29    0.13
  -1   7   3    0.62    0.15
  -1  -7  -3    0.66    0.17
  -1  -7  -3    0.72    0.12
  -1   7   3    0.56    0.14
  -2   7  -3   84.75    1.94
  -2  -7   3   82.68    2.01
  -2  -7   3   80.50    2.08
   2   7   3   82.14    1.92
   2  -7  -3   80.76    1.92
  -2   7  -3   81.87    2.32
   2  -7  -3   77.66    2.22
  -2  -7   3   83.05    1.81
   2   7   3   81.65    2.25
  -2   7   3   84.51    2.00
  -2  -7  -3   83.72    2.15
   2  -7   3   80.04    1.93
  -2   7   3   80.47    1.95
   2  -7   3   81.94    2.03
  -2  -7  -3   80.83    2.25
   2   7  -3   78.32    2.31
  -2  -7  -3   80.68    2.00
  -3   7  -3    4.95    0.47
   3   7   3    6.01    0.34
   3  -7  -3    5.97    0.33
  -3  -7   3    6.74    0.40
  -3  -7   3    6.55    0.37
  -3   7  -3    6.55    0.36
  -3  -7   3    6.56    0.27
   3  -7  -3    6.51    0.43
  -3   7   3    6.49    0.26
  -3  -7  -3    5.89    0.36
  -3  -7  -3    7.06    0.50
   3   7  -3    6.01    0.36
   3   7  -3    6.00    0.44
  -3  -7  -3    6.75    0.36
  -3   7   3    6.66    0.37
   3  -7   3    5.95    0.26
   4  -7  -3   73.62    1.92
  -4  -7   3   74.22    1.78
  -4   7  -3   69.90    2.14
   4   7   3   74.64    1.90
   4  -7  -3   74.41    2.11
  -4   7  -3   72.40    1.90
  -4  -7   3   71.50    1.99
  -4  -7  -3   73.61    1.95
   4  -7   3   75.20    2.00
  -4   7   3   73.43    1.90
   4   7  -3   73.94    1.93
   4   7  -3   72.72    2.04
  -4  -7  -3   74.82    1.91
  -4  -7  -3   71.59    2.12
   5  -7  -3    0.49    0.21
  -5   7  -3    0.32    0.18
  -5   7  -3    0.99    0.26
   5   7   3    0.53    0.21
   5  -7  -3    0.49    0.21
  -5  -7   3    0.32    0.16
  -5  -7   3    0.37    0.18
  -5  -7  -3    0.03    0.19
  -5   7   3    0.19    0.16
   5  -7   3    0.41    0.22
  -5  -7  -3    0.37    0.20
   5   7  -3    0.43    0.20
  -6  -7   3   28.83    1.05
  -6   7  -3   30.70    1.10
   6  -7  -3   28.57    1.18
   6   7   3   28.83    1.09
   6  -7  -3   31.32    1.14
  -6  -7   3   28.26    1.08
  -6   7  -3   30.29    1.17
   6   7  -3   29.01    1.08
   6  -7   3   28.69    1.16
  -6  -7  -3   30.57    1.21
  -6   7   3   27.08    1.02
  -6  -7  -3   30.23    1.16
  -7   7  -3    0.18    0.24
   7  -7  -3    0.39    0.26
   7  -7  -3    0.18    0.30
  -7  -7   3    0.39    0.26
   7   7   3    0.24    0.27
  -7   7  -3    0.60    0.27
   7   7  -3    0.63    0.27
  -7  -7  -3    0.00    0.24
   7  -7   3    0.02    0.26
  -7  -7  -3    0.23    0.25
  -7   7   3    0.27    0.23
   8  -7  -3   26.05    1.10
  -8   7  -3   26.73    1.16
  -8  -7   3   25.88    1.10
   8   7   3   24.89    1.16
  -8   7  -3   26.88    1.12
   8  -7  -3   24.18    1.26
   8   7  -3   24.52    1.15
  -8  -7  -3   26.62    1.19
  -8   7   3   25.81    1.09
   8  -7   3   24.92    1.20
  -8  -7  -3   23.59    1.16
   9  -7  -3   -0.32    0.36
   9   7   3   -0.05    0.33
  -9   7  -3    0.65    0.34
  -9  -7   3    0.36    0.29
   9  -7   3    0.52    0.40
  -9   7   3    0.36    0.31
   9   7  -3    0.99    0.42
  -9  -7  -3    0.70    0.36
  -9  -7  -3    0.30    0.33
  10   7   3   19.00    1.14
 -10  -7   3   17.70    1.03
  10  -7  -3   21.56    1.32
 -10   7  -3   22.44    1.19
  10   7  -3   20.85    1.21
 -10  -7  -3   20.34    1.15
 -10  -7  -3   23.11    1.20
 -10   7   3   19.32    1.06
  10  -7   3   22.01    1.23
 -11  -7   3    0.38    0.37
 -11   7  -3    0.11    0.41
  11  -7  -3   -0.43    0.48
  11   7   3    0.52    0.48
  11   7   3   -0.36    0.45
  11  -7   3    0.83    0.51
 -11   7   3    0.24    0.38
 -11  -7  -3    0.03    0.40
  11   7  -3    0.08    0.44
   0   7   4    0.03    0.13
   0   7  -4    0.24    0.19
   0  -7   4   -0.28    0.09
   0  -7   4    0.01    0.10
   0  -7  -4   -0.01    0.10
   0  -7  -4    0.04    0.13
   0  -7  -4   -0.14    0.07
   0   7  -4    0.01    0.06
   1   7   4  223.23    4.85
   1  -7  -4  227.66    4.98
  -1  -7   4  223.21    5.14
   1   7   4  212.72    5.33
  -1   7  -4  233.57    4.86
   1  -7  -4  225.14    4.85
  -1  -7   4  225.67    5.01
  -1   7  -4  219.52    5.61
   1  -7  -4  218.71    5.46
  -1   7   4  228.31    5.15
  -1  -7  -4  228.48    5.00
   1   7  -4  220.34    4.74
  -1   7   4  227.60    4.99
   1  -7   4  223.80    5.01
  -1  -7  -4  216.94    5.40
   1   7  -4  217.50    5.63
   1  -7   4  219.91    5.07
  -2   7  -4    2.01    0.33
   2  -7  -4    2.04    0.19
  -2   7  -4    2.16    0.21
   2   7   4    2.62    0.37
  -2  -7   4    2.15    0.11
  -2  -7   4    1.76    0.23
  -2  -7   4    1.91    0.23
   2  -7  -4    2.42    0.32
   2   7   4    1.98    0.19
   2  -7   4    2.01    0.26
  -2   7   4    2.18    0.24
   2  -7   4    2.26    0.21
  -2   7   4    2.58    0.22
  -2  -7  -4    2.31    0.25
  -2  -7  -4    1.98    0.25
   2   7  -4    2.42    0.36
  -3  -7   4   73.35    1.96
  -3   7  -4   72.33    2.18
  -3   7  -4   72.46    1.84
   3   7   4   73.72    2.16
   3   7   4   73.02    1.81
  -3  -7   4   72.21    1.88
   3  -7  -4   71.61    1.79
   3   7  -4   73.13    1.88
   3   7  -4   74.06    2.15
  -3   7   4   75.03    1.76
  -3  -7  -4   75.98    1.96
   3  -7   4   73.36    1.92
   3  -7   4   70.29    1.77
  -3   7   4   71.58    1.86
  -3  -7  -4   74.06    1.90
  -4  -7   4    0.49    0.19
  -4   7  -4    0.28    0.16
   4   7   4    0.60    0.26
  -4   7  -4    0.22    0.20
   4  -7  -4    0.52    0.17
   4  -7  -4    0.40    0.21
   4   7   4    0.66    0.19
   4  -7   4    0.56    0.20
   4   7  -4    0.45    0.20
   4   7  -4    0.45    0.18
  -4  -7  -4    0.22    0.18
  -4   7   4    0.48    0.18
  -4  -7  -4    0.79    0.17
   5  -7  -4    8.96    0.58
   5  -7  -4   10.98    0.60
  -5  -7   4    9.47    0.55
  -5   7  -4   10.05    0.56
   5   7   4    9.43    0.66
  -5   7  -4   10.15    0.64
   5   7   4   10.20    0.56
  -5  -7  -4   10.47    0.67
   5   7  -4   10.00    0.58
   5   7  -4   11.16    0.56
  -5  -7  -4    8.84    0.58
   5  -7   4    9.31    0.61
  -5   7   4    9.77    0.53
   6  -7  -4    1.21    0.33
  -6   7  -4    1.41    0.30
  -6   7  -4    1.53    0.33
   6  -7  -4    1.47    0.32
  -6  -7   4    1.24    0.28
   6   7   4    1.47    0.36
   6   7   4    1.00    0.30
   6  -7   4    1.38    0.34
  -6  -7  -4    0.98    0.30
   6   7  -4    1.27    0.29
  -6   7   4    0.96    0.25
  -6  -7  -4    1.29    0.32
  -7  -7   4   54.49    1.71
   7   7   4   52.70    1.72
   7   7   4   52.48    1.85
  -7   7  -4   53.98    1.78
   7  -7  -4   54.48    1.74
  -7   7  -4   52.53    1.72
   7  -7  -4   50.05    1.82
  -7  -7  -4   54.55    1.86
  -7  -7  -4   51.79    1.77
   7   7  -4   49.22    1.69
   7  -7   4   50.21    1.76
  -7   7   4   51.56    1.63
  -8   7  -4   -0.03    0.27
   8   7   4   -0.03    0.31
   8   7   4    0.25    0.36
   8  -7  -4    0.09    0.36
   8  -7  -4   -0.30    0.25
  -8   7  -4   -0.16    0.25
  -8  -7   4    0.11    0.26
  -8   7   4    0.02    0.24
   8  -7   4    0.30    0.32
  -8  -7  -4   -0.18    0.27
   8   7  -4   -0.09    0.28
   9  -7  -4  105.79    3.28
   9   7   4  105.81    3.17
  -9   7  -4  105.44    3.08
   9   7   4  104.05    3.07
  -9  -7   4  103.27    2.98
  -9  -7  -4  104.05    3.07
  -9   7   4   98.43    2.89
   9   7  -4  103.24    3.06
   9  -7   4  102.21    3.06
  10  -7  -4   -0.21    0.48
 -10   7  -4   -0.38    0.34
  10   7   4    0.23    0.42
  10   7   4    0.73    0.45
 -10  -7   4   -0.29    0.28
  10   7  -4    0.35    0.41
 -10   7   4   -0.05    0.31
 -10  -7  -4    0.44    0.40
  10  -7   4    0.51    0.44
  11   7   4   62.65    2.38
  11  -7  -4   65.57    2.49
  11   7   4   66.83    2.43
 -11  -7   4   63.69    2.21
 -11   7  -4   62.22    2.36
 -11  -7  -4   64.14    2.27
  11   7  -4   58.06    2.33
  11  -7   4   62.41    2.29
 -11   7   4   58.24    2.17
   0  -7  -5  225.49    5.61
   0  -7   5  224.88    5.26
   0  -7  -5  229.64    5.13
   0   7   5  225.58    5.40
   0  -7   5  233.74    5.15
   0  -7  -5  235.44    4.93
   0   7  -5  226.65    5.85
   1   7   5    3.27    0.39
  -1  -7   5    2.82    0.28
  -1   7  -5    2.77    0.41
   1  -7  -5    2.68    0.34
  -1  -7   5    2.82    0.28
  -1   7  -5    3.61    0.22
   1   7   5    3.03    0.19
   1  -7  -5    3.11    0.17
   1  -7  -5    2.89    0.27
   1  -7   5    2.96    0.28
   1   7  -5    2.75    0.40
   1  -7   5    3.34    0.29
  -1   7   5    3.13    0.30
  -1  -7  -5    2.51    0.26
  -1  -7  -5    2.72    0.32
   2  -7  -5  224.39    5.50
  -2   7  -5  220.49    4.92
   2  -7  -5  226.17    4.84
   2   7   5  222.45    4.87
  -2   7  -5  218.64    5.65
   2   7   5  219.38    5.40
  -2  -7   5  222.83    5.17
  -2  -7   5  223.22    5.02
  -2  -7  -5  223.60    5.02
  -2   7   5  224.37    5.07
  -2   7   5  220.11    4.99
   2   7  -5  209.65    5.60
  -2  -7  -5  225.40    5.40
   2  -7   5  218.39    5.06
   2  -7   5  221.85    5.03
   3   7   5    0.52    0.16
   3  -7  -5    0.51    0.22
  -3  -7   5    0.63    0.19
  -3   7  -5    0.65    0.18
  -3  -7   5    0.38    0.17
   3  -7  -5    0.73    0.15
  -3   7  -5    0.43    0.24
   3   7   5    0.44    0.25
  -3   7   5    0.62    0.17
  -3  -7  -5    0.74    0.20
  -3  -7  -5    0.79    0.19
   3   7  -5    0.92    0.27
   3  -7   5    0.51    0.15
  -3   7   5    0.75    0.15
   3  -7   5    0.65    0.20
   4   7   5   62.33    1.69
   4   7   5   60.71    2.00
   4  -7  -5   62.80    1.93
   4  -7  -5   63.46    1.67
  -4   7  -5   61.50    1.73
  -4  -7   5   65.13    1.81
  -4   7  -5   61.52    2.00
   4   7  -5   61.36    1.90
  -4   7   5   64.33    1.72
  -4  -7  -5   64.61    1.80
   4  -7   5   65.45    1.81
   4   7  -5   64.70    1.75
  -5   7  -5    1.17    0.32
   5   7   5    1.15    0.25
   5   7   5    0.90    0.32
  -5   7  -5    1.05    0.26
  -5  -7   5    1.22    0.27
   5  -7  -5    1.35    0.30
   5  -7  -5    1.45    0.28
  -5   7   5    0.80    0.22
   5   7  -5    1.21    0.27
   5  -7   5    1.21    0.29
   5   7  -5    1.01    0.26
  -5  -7  -5    0.47    0.23
   6   7   5   48.38    1.56
  -6  -7   5   49.39    1.59
   6  -7  -5   51.12    1.66
  -6   7  -5   48.80    1.59
   6   7   5   48.98    1.77
  -6   7  -5   48.27    1.71
   6  -7  -5   50.65    1.67
  -6  -7  -5   49.32    1.65
  -6   7   5   48.97    1.52
   6  -7   5   48.87    1.65
   7  -7  -5    0.54    0.34
  -7   7  -5   -0.19    0.23
   7   7   5   -0.23    0.28
  -7   7  -5    0.05    0.24
  -7  -7   5    0.04    0.23
   7  -7  -5   -0.07    0.25
   7   7   5   -0.19    0.26
  -7  -7  -5    0.06    0.25
  -7   7   5   -0.04    0.21
   7  -7   5    0.11    0.28
   7   7  -5    0.19    0.26
  -8   7  -5   93.96    2.72
   8  -7  -5   93.72    2.70
   8  -7  -5   81.45    2.78
  -8  -7   5   90.49    2.63
   8   7   5   95.22    2.71
   8   7   5   89.41    2.83
  -8  -7  -5   90.94    2.72
  -8   7   5   86.61    2.52
   8  -7   5   89.06    2.70
   8   7  -5   93.19    2.70
   9   7   5   -0.13    0.35
   9   7   5   -0.39    0.38
  -9   7  -5   -0.14    0.31
   9  -7  -5   -0.06    0.39
  -9  -7   5    0.12    0.29
   9  -7  -5    0.62    0.33
  -9  -7  -5    0.16    0.31
   9  -7   5   -0.12    0.37
  -9   7   5    0.37    0.30
   9   7  -5    0.59    0.38
 -10   7  -5   61.56    2.23
 -10  -7   5   59.20    2.05
  10   7   5   61.70    2.29
  10  -7  -5   59.61    2.35
  10   7   5   59.82    2.20
  10   7  -5   58.17    2.18
 -10  -7  -5   58.50    2.12
  10  -7   5   61.22    2.16
 -10   7   5   58.03    2.04
 -11   7  -5   -0.29    0.37
  11  -7  -5   -0.42    0.46
 -11  -7   5   -0.61    0.31
  11   7   5    0.23    0.45
 -11  -7  -5   -0.01    0.39
   0  -7  -6   -0.02    0.12
   0  -7  -6    0.07    0.15
   0  -7   6   -0.06    0.12
   0   7  -6   -0.16    0.19
   0   7   6    0.09    0.16
   0  -7   6    0.05    0.13
  -1  -7   6  103.51    2.58
  -1  -7   6  105.21    2.50
  -1   7  -6   99.28    2.98
   1  -7  -6  103.46    2.48
   1  -7  -6  100.51    2.80
   1   7   6   97.93    2.73
   1  -7   6  100.65    2.54
   1   7  -6   97.79    2.95
   1  -7   6  101.89    2.49
  -1  -7  -6  106.01    2.51
  -1  -7  -6  102.63    2.78
  -1   7   6  101.76    2.58
  -2  -7   6    1.20    0.22
  -2   7  -6    1.00    0.19
   2   7   6    0.82    0.27
  -2   7  -6    0.36    0.25
  -2  -7   6    1.19    0.22
   2  -7  -6    1.19    0.28
   2  -7   6    1.16    0.20
   2  -7   6    0.80    0.20
  -2  -7  -6    1.06    0.24
   2   7  -6    0.83    0.29
  -2   7   6    0.89    0.21
  -2  -7  -6    1.05    0.21
  -2   7   6    1.72    0.22
   3  -7  -6  169.00    4.36
  -3  -7   6  168.82    4.08
  -3   7  -6  165.52    4.48
  -3   7  -6  167.17    3.91
   3   7   6  174.89    4.35
  -3  -7   6  169.60    3.94
   3  -7   6  163.77    3.94
   3  -7   6  165.95    3.96
  -3   7   6  169.20    3.90
  -3  -7  -6  165.40    3.95
  -3   7   6  161.94    3.90
  -3  -7  -6  170.36    4.21
   3   7  -6  163.78    4.40
   4  -7  -6    0.03    0.20
  -4   7  -6    0.41    0.27
  -4   7  -6    0.22    0.19
   4   7   6    0.37    0.25
  -4  -7   6    0.45    0.21
  -4  -7  -6    0.42    0.20
   4   7  -6    0.41    0.20
   4   7  -6    0.23    0.21
   4  -7   6    0.08    0.21
  -4   7   6    0.13    0.18
  -5   7  -6  183.54    4.80
  -5   7  -6  179.74    4.34
  -5  -7   6  181.20    4.42
   5   7   6  175.14    4.66
   5  -7  -6  178.16    4.67
   5  -7  -6  179.68    4.27
   5  -7   6  183.13    4.40
   5   7  -6  180.23    4.60
   5   7  -6  176.68    4.31
  -5   7   6  174.21    4.24
  -5  -7  -6  180.62    4.40
   6  -7  -6    0.07    0.24
  -6   7  -6    0.00    0.21
  -6  -7   6    0.15    0.22
   6   7   6   -0.19    0.26
  -6   7  -6   -0.10    0.24
   6  -7  -6    0.07    0.26
   6  -7   6    0.14    0.25
  -6  -7  -6    0.16    0.25
  -6   7   6   -0.12    0.18
   6   7  -6   -0.11    0.22
   7  -7  -6   93.94    2.79
  -7   7  -6   98.82    2.91
  -7  -7   6   96.33    2.69
   7   7   6   96.72    2.92
  -7   7  -6   98.20    2.75
   7  -7  -6   91.36    2.77
  -7  -7  -6   88.34    2.73
   7  -7   6   95.27    2.75
  -7   7   6   98.41    2.60
   7   7  -6   92.70    2.69
   8  -7  -6    2.26    0.44
  -8  -7   6    1.76    0.40
  -8   7  -6    1.11    0.38
   8  -7  -6    1.39    0.48
   8   7   6    1.14    0.44
  -8  -7  -6    0.93    0.37
   8   7  -6    1.45    0.43
  -8   7   6    1.55    0.37
   8  -7   6    3.03    0.51
   9  -7  -6   56.55    1.94
  -9   7  -6   57.90    2.08
   9   7   6   60.17    2.15
  -9  -7   6   56.74    1.93
   9  -7   6   56.86    2.01
  -9   7   6   53.20    1.85
  -9  -7  -6   52.71    1.97
   9   7  -6   53.51    2.01
 -10  -7   6   -0.22    0.28
  10   7   6   -0.32    0.43
 -10   7  -6   -0.12    0.32
 -10   7   6    0.12    0.33
  10  -7   6   -0.02    0.40
  10   7  -6    0.51    0.43
 -10  -7  -6    0.12    0.37
   0   7  -7   97.23    2.93
   0  -7  -7   98.35    2.41
   0  -7  -7   95.41    2.74
   0  -7   7   97.57    2.41
   0   7   7   96.97    2.59
   0  -7   7   96.68    2.50
   1  -7  -7    0.17    0.15
  -1  -7   7   -0.06    0.13
   1   7   7   -0.30    0.14
  -1  -7   7    0.12    0.16
  -1   7  -7   -0.12    0.21
   1  -7  -7    0.03    0.17
   1  -7   7    0.19    0.16
   1   7  -7    0.00    0.24
  -1   7   7   -0.11    0.12
  -1  -7  -7    0.18    0.18
  -1  -7  -7    0.00    0.14
   1  -7   7    0.03    0.16
  -2   7  -7  115.81    3.33
   2  -7  -7  111.32    3.15
   2   7   7  112.73    3.11
  -2  -7   7  115.20    2.79
  -2  -7   7  116.35    2.92
   2  -7   7  109.43    2.83
   2  -7   7  115.43    2.80
  -2   7   7  112.51    2.77
   2   7  -7  112.00    3.26
  -2   7   7  113.85    2.82
  -2  -7  -7  115.96    3.10
  -2  -7  -7  111.87    2.80
  -3  -7   7    0.48    0.20
  -3   7  -7    0.20    0.25
   3   7   7    0.36    0.25
  -3  -7   7    0.64    0.21
   3  -7  -7    0.24    0.23
  -3  -7  -7    0.48    0.22
  -3   7   7    0.64    0.19
   3   7  -7    0.49    0.19
   3   7  -7    0.24    0.23
  -3  -7  -7    0.51    0.21
   3  -7   7    0.56    0.21
  -3   7   7    0.30    0.18
   3  -7   7    0.38    0.18
   4  -7  -7  230.42    5.85
  -4   7  -7  228.87    5.34
   4   7   7  228.70    5.75
  -4   7  -7  227.74    5.98
  -4  -7   7  231.06    5.50
  -4   7   7  228.10    5.29
   4   7  -7  224.96    5.32
  -4  -7  -7  232.88    5.40
   4  -7   7  228.19    5.37
   4   7  -7  234.79    5.87
  -5   7  -7    1.59    0.34
   5   7   7    1.62    0.40
  -5  -7   7    2.74    0.37
  -5   7  -7    2.14    0.44
   5  -7  -7    2.71    0.43
  -5   7   7    2.49    0.34
  -5  -7  -7    1.60    0.33
   5  -7   7    2.31    0.40
   5   7  -7    2.60    0.38
   5   7  -7    2.33    0.38
  -6   7  -7  174.29    4.26
   6   7   7  172.52    4.53
  -6   7  -7  174.82    4.64
   6  -7  -7  167.39    4.50
  -6  -7   7  169.66    4.26
   6   7  -7  165.63    4.20
  -6   7   7  162.67    4.09
   6  -7   7  159.87    4.22
  -6  -7  -7  169.37    4.29
  -7   7  -7    0.36    0.33
   7  -7  -7    0.07    0.28
  -7   7  -7    0.24    0.30
  -7  -7   7    0.02    0.25
   7   7   7   -0.12    0.34
   7  -7   7    0.19    0.30
   7   7  -7    0.27    0.30
  -7   7   7    0.49    0.26
  -7  -7  -7    0.15    0.28
  -8  -7   7   48.79    1.73
   8  -7  -7   51.84    1.82
  -8   7  -7   55.43    1.89
   8   7   7   55.50    1.98
  -8   7   7   50.34    1.69
  -8  -7  -7   47.11    1.82
   8  -7   7   52.25    1.84
   8   7  -7   47.20    1.79
   9   7   7    0.14    0.40
  -9   7  -7    0.16    0.35
  -9  -7   7   -0.13    0.26
   9  -7  -7   -0.22    0.32
   9   7  -7    0.08    0.38
  -9  -7  -7    0.04    0.31
   9  -7   7   -0.17    0.36
  -9   7   7   -0.01    0.31
 -10   7  -7   30.76    1.48
  10   7   7   27.56    1.47
 -10  -7   7   32.53    1.39
 -10   7   7   31.27    1.39
  10   7  -7   30.82    1.52
 -10  -7  -7   30.75    1.43
  10  -7   7   29.05    1.41
   0   7  -8    0.06    0.25
   0  -7   8    0.23    0.17
   0  -7  -8    0.12    0.17
   0  -7  -8    0.07    0.21
   0   7   8    0.03    0.17
   0  -7   8    0.03    0.17
  -1  -7   8   94.23    2.36
  -1   7  -8   91.59    2.88
   1  -7  -8   95.05    2.76
   1  -7  -8   93.88    2.36
  -1  -7   8   92.08    2.47
   1   7   8   90.25    2.61
  -1  -7  -8   93.54    2.38
  -1   7   8   94.42    2.48
   1  -7   8   93.08    2.45
   1  -7   8   92.74    2.35
   1   7  -8   91.17    2.87
  -1  -7  -8   94.53    2.73
  -2  -7   8    0.63    0.22
   2   7   8    0.34    0.27
   2  -7  -8    0.43    0.25
  -2  -7   8    0.33    0.18
  -2   7  -8    0.66    0.31
  -2  -7  -8    0.25    0.23
   2   7  -8    0.35    0.27
  -2   7   8    0.24    0.17
  -2   7   8    0.38    0.19
   2  -7   8    0.31    0.19
   2  -7   8    0.22    0.19
  -2  -7  -8    0.66    0.21
  -3   7  -8  134.71    3.93
  -3  -7   8  138.18    3.38
  -3  -7   8  140.97    3.54
   3   7   8  140.25    3.77
   3  -7  -8  132.17    3.80
  -3   7   8  141.10    3.38
   3   7  -8  147.33    3.93
   3  -7   8  134.88    3.45
  -3  -7  -8  138.56    3.74
  -3  -7  -8  139.86    3.43
   3   7  -8  143.84    3.39
  -3   7   8  141.16    3.40
   3  -7   8  134.77    3.39
   4   7   8    1.13    0.34
  -4  -7   8    1.37    0.30
  -4   7  -8    1.15    0.37
   4  -7  -8    1.55    0.36
   4   7  -8    0.79    0.31
   4  -7   8    1.18    0.30
  -4   7   8    0.86    0.25
   4   7  -8    1.35    0.29
  -4  -7  -8    0.73    0.27
   5   7   8  149.33    4.12
  -5   7  -8  152.12    4.25
  -5  -7   8  150.86    3.87
   5  -7  -8  150.43    4.15
   5   7  -8  152.72    4.11
  -5  -7  -8  157.27    3.89
   5  -7   8  150.42    3.81
   5   7  -8  152.25    3.79
  -5   7   8  150.01    3.71
   6  -7  -8   -0.11    0.26
   6   7   8   -0.11    0.33
  -6  -7   8   -0.02    0.23
  -6   7  -8   -0.12    0.29
   6  -7   8    0.55    0.31
  -6   7   8    0.47    0.26
   6   7  -8    0.06    0.25
  -6  -7  -8    0.45    0.29
   7   7   8  110.10    3.24
   7  -7  -8  110.02    3.19
  -7   7  -8  108.15    2.99
  -7   7  -8  110.55    3.27
  -7  -7   8  107.98    3.00
  -7  -7  -8  106.67    3.09
   7  -7   8  105.02    3.00
   7   7  -8  104.31    3.00
  -7   7   8  103.15    2.87
   8  -7  -8    0.11    0.34
  -8   7  -8    0.60    0.35
   8   7   8   -0.41    0.34
  -8  -7   8    0.22    0.30
  -8   7   8   -0.09    0.28
   8   7  -8    0.14    0.35
   8  -7   8   -0.19    0.34
  -8  -7  -8    0.02    0.32
   9  -7  -8   45.78    1.74
   9   7   8   45.91    1.87
  -9   7  -8   45.15    1.73
  -9  -7   8   44.28    1.68
  -9  -7  -8   47.35    1.82
   9   7  -8   44.65    1.82
   9  -7   8   43.44    1.71
  -9   7   8   44.08    1.65
 -10   7  -8   -0.03    0.35
 -10  -7   8    0.05    0.32
  10   7   8    0.49    0.50
  10  -7   8   -0.29    0.37
  10   7  -8   -0.49    0.41
 -10   7   8    0.10    0.37
   0  -7  -9  211.90    4.90
   0  -7  -9  212.04    5.57
   0   7  -9  209.59    5.68
   0  -7   9  210.53    5.09
   0  -7   9  213.09    4.89
   0   7   9  211.62    5.17
   1   7   9    0.14    0.25
  -1   7  -9    0.44    0.31
  -1  -7   9    0.34    0.21
   1  -7  -9    0.42    0.20
   1  -7  -9    0.24    0.28
  -1  -7   9    0.54    0.23
  -1   7   9    0.40    0.22
   1  -7   9    0.20    0.19
   1   7  -9    0.29    0.28
   1  -7   9    0.43    0.21
  -1  -7  -9    0.11    0.19
  -1  -7  -9    0.27    0.28
  -2  -7   9  160.86    3.79
  -2  -7   9  157.58    3.97
   2   7   9  150.81    4.14
   2  -7  -9  162.74    4.35
  -2   7  -9  157.62    4.44
  -2   7   9  157.38    3.88
   2   7  -9  161.11    4.45
  -2  -7  -9  166.04    4.35
  -2  -7  -9  156.31    3.81
   2  -7   9  152.54    3.92
   2  -7   9  156.50    3.78
  -2   7   9  158.41    3.79
  -3   7  -9   -0.15    0.25
   3   7   9    0.22    0.28
   3  -7  -9    0.36    0.27
  -3  -7   9   -0.05    0.19
  -3  -7  -9    0.15    0.20
   3  -7   9   -0.12    0.18
  -3  -7  -9    0.15    0.26
   3  -7   9    0.48    0.23
   3   7  -9    0.20    0.21
  -3   7   9    0.12    0.19
   3   7  -9    0.18    0.26
  -3   7   9    0.09    0.19
   4   7   9   88.13    2.68
  -4  -7   9   87.02    2.44
   4  -7  -9   84.17    2.67
  -4   7  -9   87.35    2.78
   4   7  -9   84.92    2.70
  -4  -7  -9   86.89    2.41
  -4   7   9   86.81    2.32
   4   7  -9   85.16    2.33
   4  -7   9   86.45    2.37
  -5  -7   9   -0.22    0.20
   5   7   9   -0.06    0.31
  -5   7  -9   -0.01    0.26
   5  -7  -9    0.42    0.30
  -5  -7  -9    0.05    0.26
  -5   7   9    0.40    0.24
   5   7  -9   -0.05    0.25
   5   7  -9    0.22    0.29
   5  -7   9    0.37    0.27
  -6   7  -9   90.59    2.83
   6  -7  -9   86.33    2.74
  -6  -7   9   94.21    2.58
   6   7   9   88.18    2.77
  -6   7   9   87.38    2.43
  -6  -7  -9   84.65    2.59
   6  -7   9   88.46    2.54
   6   7  -9   83.89    2.51
   7   7   9    0.02    0.34
   7  -7  -9    0.02    0.32
  -7  -7   9    0.14    0.26
  -7   7  -9    0.15    0.33
   7  -7   9    0.00    0.31
  -7  -7  -9   -0.08    0.30
   7   7  -9   -0.16    0.30
  -7   7   9    0.17    0.29
   8  -7  -9   96.88    2.96
   8   7   9   93.03    2.97
  -8  -7   9   94.61    2.79
  -8   7   9   94.48    2.70
   8  -7   9   92.77    2.79
  -8  -7  -9   90.23    2.85
   8   7  -9   96.16    2.89
  -9  -7   9    1.06    0.41
   9   7   9    0.82    0.50
   9  -7  -9    0.43    0.44
   9  -7   9    0.07    0.41
   9   7  -9    1.27    0.50
  -9  -7  -9    0.32    0.36
  -9   7   9    0.79    0.41
[truncated: 928,672 more chars]
